# Supplementary material for: ACE2 Netlas: In silico Functional Characterization and Drug-Gene Interactions of ACE2 Gene Network to Understand Its Potential Involvement in COVID-19 Susceptibility
Source: Front Genet. 2021 Aug 27;12:698033. doi: 10.3389/fgene.2021.698033 (PMC8429844; doi:10.3389/fgene.2021.698033)
Supplement: Supplementary file 1 [file Data_Sheet_1.xlsx]

## Sheet: TableS1.ACEgene-network_list
Gene (HGNC_Symbol)	Ensembl ID	Description	Chromosome	Start position	End position	Band	Source
AAMP	ENSG00000127837	angio-associated, migratory cell protein [Source:HGNC Symbol;Acc:18]	2	219128850	219134980	q35	genemania/BioGrid
ACE	ENSG00000159640	angiotensin I converting enzyme [Source:HGNC Symbol;Acc:2707]	17	61554422	61599205	q23.3	genemania
ACE2	ENSG00000130234	angiotensin I converting enzyme 2 [Source:HGNC Symbol;Acc:13557]	X	15579156	15620271	p22.2	stringdb/genemania/genenetwork/biogrid/APID
AGT	ENSG00000135744	angiotensinogen (serpin peptidase inhibitor, clade A, member 8) [Source:HGNC Symbol;Acc:333]	1	230838269	230850043	q42.2	stringdb/genemania/APID/functionalnet
ALDOB	ENSG00000136872	aldolase B, fructose-bisphosphate [Source:HGNC Symbol;Acc:417]	9	104182860	104198105	q31.1	genenetwork.nl
APOA1	ENSG00000118137	apolipoprotein A-I [Source:HGNC Symbol;Acc:600]	11	116706467	116708666	q23.3	genenetwork.nl
APOBEC1	ENSG00000111701	apolipoprotein B mRNA editing enzyme, catalytic polypeptide 1 [Source:HGNC Symbol;Acc:604]	12	7801996	7818499	p13.31	genenetwork.nl
C1orf116	ENSG00000182795	chromosome 1 open reading frame 116 [Source:HGNC Symbol;Acc:28667]	1	207191866	207206101	q32.2	genemania
CALM1	ENSG00000198668	calmodulin 1 (phosphorylase kinase, delta) [Source:HGNC Symbol;Acc:1442]	14	90862846	90874605	q32.11	APID/BioGrid
CALM2	ENSG00000143933	calmodulin 2 (phosphorylase kinase, delta) [Source:HGNC Symbol;Acc:1445]	2	47387221	47403740	p21	APID
CAT	ENSG00000121691	catalase [Source:HGNC Symbol;Acc:1516]	11	34460472	34493609	p13	genemania/Biogrid/APID
CLCA1	ENSG00000016490	chloride channel accessory 1 [Source:HGNC Symbol;Acc:2015]	1	86934051	86965972	p22.3	genenetwork.nl
DEFA5	ENSG00000164816	defensin, alpha 5, Paneth cell-specific [Source:HGNC Symbol;Acc:2764]	8	6912831	6914256	p23.1	BioGrid
DEFA6	ENSG00000164822	defensin, alpha 6, Paneth cell-specific [Source:HGNC Symbol;Acc:2765]	8	6782215	6783598	p23.1	genenetwork.nl
DLEU2	ENSG00000231607	deleted in lymphocytic leukemia 2 (non-protein coding) [Source:HGNC Symbol;Acc:13748]	13	50601269	50699856	q14.2	BioGrid
DPEP1	ENSG00000015413	dipeptidase 1 (renal) [Source:HGNC Symbol;Acc:3002]	16	89679716	89704839	q24.3	genemania
DPP4	ENSG00000197635	dipeptidyl-peptidase 4 [Source:HGNC Symbol;Acc:3009]	2	162848751	162931052	q24.2	stringdb
FABP1	ENSG00000163586	fatty acid binding protein 1, liver [Source:HGNC Symbol;Acc:3555]	2	88422510	88427635	p11.2	genenetwork.nl
FABP2	ENSG00000145384	fatty acid binding protein 2, intestinal [Source:HGNC Symbol;Acc:3556]	4	120238405	120243545	q26	genenetwork.nl
GHRL	ENSG00000157017	ghrelin/obestatin prepropeptide [Source:HGNC Symbol;Acc:18129]	3	10327359	10334631	p25.3	genemania/APID/functionalnet
HRAS	ENSG00000174775	Harvey rat sarcoma viral oncogene homolog [Source:HGNC Symbol;Acc:5173]	11	532242	537287	p15.5	BioGrid
ISYNA1	ENSG00000105655	inositol-3-phosphate synthase 1 [Source:HGNC Symbol;Acc:29821]	19	18545198	18549111	p13.11	genemania/APID/Biogrid
IYD	ENSG00000009765	iodotyrosine deiodinase [Source:HGNC Symbol;Acc:21071]	6	150690028	150727105	q25.1	genenetwork.nl
KDM3A	ENSG00000115548	lysine (K)-specific demethylase 3A [Source:HGNC Symbol;Acc:20815]	2	86667770	86719839	p11.2	genemania
LACTB2	ENSG00000147592	lactamase, beta 2 [Source:HGNC Symbol;Acc:18512]	8	71547553	71581409	q13.3	genemania
LRRC15	ENSG00000172061	leucine rich repeat containing 15 [Source:HGNC Symbol;Acc:20818]	3	194075976	194090472	q29	functionalnet
LRRC19	ENSG00000184434	leucine rich repeat containing 19 [Source:HGNC Symbol;Acc:23379]	9	26993134	27005691	p21.2	genenetwork.nl
MEP1A	ENSG00000112818	meprin A, alpha (PABA peptide hydrolase) [Source:HGNC Symbol;Acc:7015]	6	46761127	46807515	p12.3	stringdb
MEP1B	ENSG00000141434	meprin A, beta [Source:HGNC Symbol;Acc:7020]	18	29765032	29800367	q12.1	stringdb
MME	ENSG00000196549	membrane metallo-endopeptidase [Source:HGNC Symbol;Acc:7154]	3	154741913	154901497	q25.2	stringdb
NR5A1	ENSG00000136931	nuclear receptor subfamily 5, group A, member 1 [Source:HGNC Symbol;Acc:7983]	9	127243516	127269709	q33.3	functionalnet
NR5A2	ENSG00000116833	nuclear receptor subfamily 5, group A, member 2 [Source:HGNC Symbol;Acc:7984]	1	199996730	200146552	q32.1	functionalnet
NTS	ENSG00000133636	neurotensin [Source:HGNC Symbol;Acc:8038]	12	86268073	86276770	q21.31	APID/functionalnet
PDE9A	ENSG00000160191	phosphodiesterase 9A [Source:HGNC Symbol;Acc:8795]	21	44073746	44195619	q22.3	genemania
PLA2G12B	ENSG00000138308	phospholipase A2, group XIIB [Source:HGNC Symbol;Acc:18555]	10	74694928	74714536	q22.1	genenetwork.nl
POU2F1	ENSG00000143190	POU class 2 homeobox 1 [Source:HGNC Symbol;Acc:9212]	1	167190066	167396582	q24.1	genemania
PRCP	ENSG00000137509	prolylcarboxypeptidase (angiotensinase C) [Source:HGNC Symbol;Acc:9344]	11	82534544	82681626	q14.1	stringdb
RASEF	ENSG00000165105	RAS and EF-hand domain containing [Source:HGNC Symbol;Acc:26464]	9	85594500	85678092	q21.32	genemania
RORA	ENSG00000069667	RAR-related orphan receptor A [Source:HGNC Symbol;Acc:10258]	15	60780483	61521518	q22.2	functionalnet
RORB	ENSG00000198963	RAR-related orphan receptor B [Source:HGNC Symbol;Acc:10259]	9	77112281	77308093	q21.13	functionalnet
RORC	ENSG00000143365	RAR-related orphan receptor C [Source:HGNC Symbol;Acc:10260]	1	151778547	151804348	q21.3	functionalnet
RPS18P1	ENSG00000225831	ribosomal protein S18 pseudogene 1 [Source:HGNC Symbol;Acc:16550]	20	5513524	5513981	p12.3	genenetwork.nl
SI	ENSG00000090402	sucrase-isomaltase (alpha-glucosidase) [Source:HGNC Symbol;Acc:10856]	3	164696686	164796283	q26.1	genenetwork.nl
SLC10A2	ENSG00000125255	solute carrier family 10 (sodium/bile acid cotransporter), member 2 [Source:HGNC Symbol;Acc:10906]	13	103696350	103719196	q33.1	genemania
SLC12A6	ENSG00000140199	solute carrier family 12 (potassium/chloride transporter), member 6 [Source:HGNC Symbol;Acc:10914]	15	34525460	34630261	q14	genemania
SLC37A1	ENSG00000160190	solute carrier family 37 (glucose-6-phosphate transporter), member 1 [Source:HGNC Symbol;Acc:11024]	21	43916118	44001550	q22.3	genemania
SLC3A1	ENSG00000138079	solute carrier family 3 (amino acid transporter heavy chain), member 1 [Source:HGNC Symbol;Acc:11025]	2	44502599	44548633	p21	genenetwork.nl
SLC44A4	ENSG00000204385	solute carrier family 44, member 4 [Source:HGNC Symbol;Acc:13941]	6	31830969	31846823	p21.33	genemania
SLC6A19	ENSG00000174358	solute carrier family 6 (neutral amino acid transporter), member 19 [Source:HGNC Symbol;Acc:27960]	5	1201710	1225232	p15.33	BioGrid
TINAG	ENSG00000137251	tubulointerstitial nephritis antigen [Source:HGNC Symbol;Acc:14599]	6	54172657	54254950	p12.1	genenetwork.nl
TMEM27	ENSG00000147003	transmembrane protein 27 [Source:HGNC Symbol;Acc:29437]	X	15645441	15683154	p22.2	genemania/genenetwork.nl
TMPRSS2	ENSG00000184012	transmembrane protease, serine 2 [Source:HGNC Symbol;Acc:11876]	21	42836478	42903043	q22.3	genemania
TRPM4	ENSG00000130529	transient receptor potential cation channel, subfamily M, member 4 [Source:HGNC Symbol;Acc:17993]	19	49660998	49715093	q13.33	genemania
XPNPEP2	ENSG00000122121	X-prolyl aminopeptidase (aminopeptidase P) 2, membrane-bound [Source:HGNC Symbol;Acc:12823]	X	128872950	128903514	q26.1	stringdb
AC009336.19							genenetwork.nl
ADGRG7							genenetwork.nl
CTD-2501B8.1							genemania
RP11-167H9.4							genenetwork.nl
RP11-267C16.2							genenetwork.nl
RP11-292E2.1							genenetwork.nl
S							APID

## Sheet: TableS2.TissueEnrichment
Category	GeneSet	N_genes	N_overlap	p	adjP	genes	Column1	Column2	Column3	Column4	Column5	Column6	Column7	Column8	Column9	Column10	Column11	Column12	Column13	Column14	Column15	Column16	Column17	Column18	Column19	Column20	Column21	Column22	Column23	Column24	Column25	Column26	Column27	Column28	Column29	Column30	Column31	Column32	Column33	Column34	Column35	Column36	Column37	Column38	Column39	Column40	Column41	Column42	Column43
DEG.up	Small_Intestine_Terminal_Ileum	1883	31	1.07074e-16	5.78198e-15	ENSG00000159640:ENSG00000130234:ENSG00000136872:ENSG00000118137:ENSG00000111701:ENSG00000016490:ENSG00000164816:ENSG00000164822:ENSG00000015413:ENSG00000197635:ENSG00000163586:ENSG00000145384:ENSG00000009765:ENSG00000184434:ENSG00000112818:ENSG00000141434:ENSG00000196549:ENSG00000133636:ENSG00000160191:ENSG00000138308:ENSG00000165105:ENSG00000090402:ENSG00000125255:ENSG00000160190:ENSG00000138079…
DEG.up	Colon_Transverse	1135	22	7.6031e-13	4.10567e-11	ENSG00000130234:ENSG00000111701:ENSG00000016490:ENSG00000164816:ENSG00000164822:ENSG00000163586:ENSG00000145384:ENSG00000184434:ENSG00000112818:ENSG00000141434:ENSG00000160191:ENSG00000138308:ENSG00000165105:ENSG00000090402:ENSG00000160190:ENSG00000138079:ENSG00000204385:ENSG00000174358:ENSG00000137251:ENSG00000184012:ENSG00000130529:ENSG00000116833
DEG.twoside	Small_Intestine_Terminal_Ileum	3142	31	1.33364e-10	7.20165e-09	ENSG00000159640:ENSG00000130234:ENSG00000136872:ENSG00000118137:ENSG00000111701:ENSG00000016490:ENSG00000164816:ENSG00000164822:ENSG00000015413:ENSG00000197635:ENSG00000163586:ENSG00000145384:ENSG00000009765:ENSG00000184434:ENSG00000112818:ENSG00000141434:ENSG00000196549:ENSG00000133636:ENSG00000160191:ENSG00000138308:ENSG00000165105:ENSG00000090402:ENSG00000125255:ENSG00000160190:ENSG00000138079…
DEG.twoside	Colon_Transverse	2542	27	9.43507e-10	5.09494e-08	ENSG00000130234:ENSG00000135744:ENSG00000118137:ENSG00000111701:ENSG00000182795:ENSG00000016490:ENSG00000164816:ENSG00000164822:ENSG00000163586:ENSG00000145384:ENSG00000184434:ENSG00000112818:ENSG00000141434:ENSG00000160191:ENSG00000138308:ENSG00000165105:ENSG00000090402:ENSG00000140199:ENSG00000160190:ENSG00000138079:ENSG00000204385:ENSG00000174358:ENSG00000137251:ENSG00000184012:ENSG00000130529…
DEG.up	Kidney_Cortex	961	16	1.93346e-08	1.04407e-06	ENSG00000130234:ENSG00000136872:ENSG00000015413:ENSG00000197635:ENSG00000163586:ENSG00000147592:ENSG00000184434:ENSG00000196549:ENSG00000138308:ENSG00000125255:ENSG00000138079:ENSG00000204385:ENSG00000174358:ENSG00000137251:ENSG00000147003:ENSG00000184012
DEG.up	Liver	1099	11	0.00046296	0.0249999	ENSG00000135744:ENSG00000136872:ENSG00000118137:ENSG00000163586:ENSG00000009765:ENSG00000147592:ENSG00000138308:ENSG00000147003:ENSG00000184012:ENSG00000143365:ENSG00000116833
DEG.up	Pancreas	550	7	0.00145821	0.0787434	ENSG00000136872:ENSG00000015413:ENSG00000165105:ENSG00000138079:ENSG00000184012:ENSG00000143365:ENSG00000116833
DEG.up	Stomach	786	8	0.00271027	0.146355	ENSG00000136872:ENSG00000118137:ENSG00000182795:ENSG00000157017:ENSG00000165105:ENSG00000204385:ENSG00000147003:ENSG00000184012
DEG.twoside	Prostate	2735	16	0.00711949	0.384453	ENSG00000130234:ENSG00000118137:ENSG00000182795:ENSG00000197635:ENSG00000105655:ENSG00000196549:ENSG00000160191:ENSG00000165105:ENSG00000140199:ENSG00000160190:ENSG00000204385:ENSG00000184012:ENSG00000130529:ENSG00000143365:ENSG00000069667:ENSG00000198963
DEG.up	Adipose_Subcutaneous	1704	6	0.432587	1	ENSG00000159640:ENSG00000130234:ENSG00000197635:ENSG00000196549:ENSG00000137509:ENSG00000116833
DEG.up	Adipose_Visceral_Omentum	1437	4	0.65804	1	ENSG00000130234:ENSG00000197635:ENSG00000196549:ENSG00000116833
DEG.up	Adrenal_Gland	1209	5	0.317598	1	ENSG00000147592:ENSG00000137509:ENSG00000204385:ENSG00000136931:ENSG00000069667
DEG.up	Artery_Aorta	2110	4	0.904075	1	ENSG00000135744:ENSG00000105655:ENSG00000140199:ENSG00000130529
DEG.up	Artery_Coronary	1604	2	0.964282	1	ENSG00000135744:ENSG00000105655
DEG.up	Artery_Tibial	2179	4	0.917336	1	ENSG00000135744:ENSG00000105655:ENSG00000115548:ENSG00000198963
DEG.up	Bladder	729	1	0.899976	1	ENSG00000160191
DEG.up	Brain_Amygdala	1442	3	0.833297	1	ENSG00000135744:ENSG00000133636:ENSG00000198963
DEG.up	Brain_Anterior_cingulate_cortex_BA24	1870	2	0.983383	1	ENSG00000135744:ENSG00000198963
DEG.up	Brain_Caudate_basal_ganglia	1707	3	0.908091	1	ENSG00000135744:ENSG00000133636:ENSG00000198963
DEG.up	Brain_Cerebellar_Hemisphere	4269	3	0.999953	1	ENSG00000135744:ENSG00000160191:ENSG00000143190
DEG.up	Brain_Cerebellum	4077	4	0.999484	1	ENSG00000135744:ENSG00000160191:ENSG00000143190:ENSG00000160190
DEG.up	Brain_Cortex	2167	2	0.99317	1	ENSG00000135744:ENSG00000198963
DEG.up	Brain_Frontal_Cortex_BA9	2429	2	0.996968	1	ENSG00000135744:ENSG00000198963
DEG.up	Brain_Hippocampus	1546	2	0.957976	1	ENSG00000135744:ENSG00000133636
DEG.up	Brain_Hypothalamus	1985	3	0.953135	1	ENSG00000135744:ENSG00000133636:ENSG00000198963
DEG.up	Brain_Nucleus_accumbens_basal_ganglia	1839	2	0.981804	1	ENSG00000135744:ENSG00000198963
DEG.up	Brain_Putamen_basal_ganglia	1350	2	0.928104	1	ENSG00000135744:ENSG00000198963
DEG.up	Brain_Spinal_cord_cervical_c-1	1620	2	0.965858	1	ENSG00000135744:ENSG00000133636
DEG.up	Brain_Substantia_nigra	1281	2	0.913568	1	ENSG00000135744:ENSG00000133636
DEG.up	Breast_Mammary_Tissue	1441	6	0.284669	1	ENSG00000130234:ENSG00000197635:ENSG00000196549:ENSG00000165105:ENSG00000204385:ENSG00000116833
DEG.up	Cells_Cultured_fibroblasts	3692	5	0.993841	1	ENSG00000197635:ENSG00000147592:ENSG00000196549:ENSG00000137509:ENSG00000172061
DEG.up	Cells_EBV-transformed_lymphocytes	3866	6	0.987999	1	ENSG00000147592:ENSG00000143190:ENSG00000125255:ENSG00000140199:ENSG00000160190:ENSG00000137251
DEG.up	Cervix_Ectocervix	189	1	0.444494	1	ENSG00000105655
DEG.up	Cervix_Endocervix	1741	1	0.996531	1	ENSG00000105655
DEG.up	Colon_Sigmoid	1269	6	0.196134	1	ENSG00000016490:ENSG00000163586:ENSG00000145384:ENSG00000184434:ENSG00000112818:ENSG00000160191
DEG.up	Esophagus_Gastroesophageal_Junction	1017	1	0.960783	1	ENSG00000160191
DEG.up	Esophagus_Mucosa	1767	5	0.648269	1	ENSG00000182795:ENSG00000165105:ENSG00000140199:ENSG00000160190:ENSG00000184012
DEG.up	Esophagus_Muscularis	1047	1	0.96446	1	ENSG00000160191
DEG.up	Fallopian_Tube	456	1	0.760458	1	ENSG00000105655
DEG.up	Heart_Atrial_Appendage	574	4	0.101016	1	ENSG00000130234:ENSG00000135744:ENSG00000118137:ENSG00000138308
DEG.up	Heart_Left_Ventricle	395	3	0.122773	1	ENSG00000130234:ENSG00000135744:ENSG00000118137
DEG.up	Kidney_Medulla	93	1	0.250614	1	ENSG00000105655
DEG.up	Lung	3066	9	0.622182	1	ENSG00000159640:ENSG00000182795:ENSG00000197635:ENSG00000196549:ENSG00000165105:ENSG00000140199:ENSG00000204385:ENSG00000184012:ENSG00000130529
DEG.up	Minor_Salivary_Gland	1292	7	0.101682	1	ENSG00000182795:ENSG00000165105:ENSG00000160190:ENSG00000204385:ENSG00000184012:ENSG00000130529:ENSG00000143365
DEG.up	Muscle_Skeletal	879	2	0.762255	1	ENSG00000143365:ENSG00000069667
DEG.up	Nerve_Tibial	4189	6	0.994662	1	ENSG00000118137:ENSG00000105655:ENSG00000115548:ENSG00000196549:ENSG00000160191:ENSG00000143190
DEG.up	Ovary	3697	5	0.993922	1	ENSG00000118137:ENSG00000105655:ENSG00000143190:ENSG00000147003:ENSG00000136931
DEG.up	Pituitary	3273	10	0.570099	1	ENSG00000159640:ENSG00000136872:ENSG00000105655:ENSG00000133636:ENSG00000165105:ENSG00000160190:ENSG00000204385:ENSG00000143365:ENSG00000136931:ENSG00000198963
DEG.up	Prostate	2035	12	0.0197729	1	ENSG00000182795:ENSG00000197635:ENSG00000105655:ENSG00000196549:ENSG00000160191:ENSG00000165105:ENSG00000160190:ENSG00000204385:ENSG00000184012:ENSG00000130529:ENSG00000143365:ENSG00000198963
DEG.up	Skin_Not_Sun_Exposed_Suprapubic	2054	6	0.620722	1	ENSG00000182795:ENSG00000115548:ENSG00000130529:ENSG00000143365:ENSG00000069667:ENSG00000172061
DEG.up	Skin_Sun_Exposed_Lower_leg	2183	6	0.68123	1	ENSG00000182795:ENSG00000115548:ENSG00000130529:ENSG00000143365:ENSG00000069667:ENSG00000172061
DEG.up	Spleen	2702	7	0.748751	1	ENSG00000015413:ENSG00000197635:ENSG00000157017:ENSG00000105655:ENSG00000160191:ENSG00000140199:ENSG00000136931
DEG.up	Testis	5977	13	0.958848	1	ENSG00000159640:ENSG00000130234:ENSG00000118137:ENSG00000015413:ENSG00000105655:ENSG00000115548:ENSG00000147592:ENSG00000138308:ENSG00000090402:ENSG00000140199:ENSG00000160190:ENSG00000143365:ENSG00000136931
DEG.up	Thyroid	3755	10	0.750585	1	ENSG00000159640:ENSG00000130234:ENSG00000009765:ENSG00000165105:ENSG00000160190:ENSG00000147003:ENSG00000184012:ENSG00000130529:ENSG00000143365:ENSG00000172061
DEG.up	Uterus	4026	3	0.999891	1	ENSG00000105655:ENSG00000143190:ENSG00000116833
DEG.up	Vagina	2026	3	0.957728	1	ENSG00000182795:ENSG00000137509:ENSG00000140199
DEG.up	Whole_Blood	1322	2	0.922501	1	ENSG00000196549:ENSG00000140199
DEG.down	Adipose_Subcutaneous	1320	2	0.922086	1	ENSG00000135744:ENSG00000143365
DEG.down	Adipose_Visceral_Omentum	1410	5	0.443216	1	ENSG00000136872:ENSG00000118137:ENSG00000160190:ENSG00000204385:ENSG00000143365
DEG.down	Adrenal_Gland	3012	7	0.844156	1	ENSG00000159640:ENSG00000136872:ENSG00000174775:ENSG00000115548:ENSG00000140199:ENSG00000130529:ENSG00000143365
DEG.down	Artery_Aorta	1334	7	0.115324	1	ENSG00000159640:ENSG00000130234:ENSG00000118137:ENSG00000197635:ENSG00000196549:ENSG00000160191:ENSG00000160190
DEG.down	Artery_Coronary	868	4	0.279955	1	ENSG00000136872:ENSG00000015413:ENSG00000197635:ENSG00000160191
DEG.down	Artery_Tibial	1761	5	0.645205	1	ENSG00000159640:ENSG00000197635:ENSG00000196549:ENSG00000160191:ENSG00000160190
DEG.down	Bladder	104	0	1	1
DEG.down	Brain_Amygdala	7055	11	0.999421	1	ENSG00000159640:ENSG00000121691:ENSG00000105655:ENSG00000115548:ENSG00000147592:ENSG00000143190:ENSG00000137509:ENSG00000140199:ENSG00000160190:ENSG00000130529:ENSG00000069667
DEG.down	Brain_Anterior_cingulate_cortex_BA24	6065	11	0.992554	1	ENSG00000159640:ENSG00000121691:ENSG00000105655:ENSG00000115548:ENSG00000147592:ENSG00000143190:ENSG00000137509:ENSG00000140199:ENSG00000160190:ENSG00000130529:ENSG00000069667
DEG.down	Brain_Caudate_basal_ganglia	6231	8	0.999812	1	ENSG00000121691:ENSG00000115548:ENSG00000147592:ENSG00000137509:ENSG00000140199:ENSG00000160190:ENSG00000130529:ENSG00000069667
DEG.down	Brain_Cerebellar_Hemisphere	2411	6	0.77268	1	ENSG00000159640:ENSG00000121691:ENSG00000105655:ENSG00000147592:ENSG00000137509:ENSG00000130529
DEG.down	Brain_Cerebellum	2513	6	0.806954	1	ENSG00000159640:ENSG00000118137:ENSG00000121691:ENSG00000105655:ENSG00000147592:ENSG00000130529
DEG.down	Brain_Cortex	5008	8	0.994383	1	ENSG00000159640:ENSG00000121691:ENSG00000115548:ENSG00000147592:ENSG00000137509:ENSG00000140199:ENSG00000130529:ENSG00000069667
DEG.down	Brain_Frontal_Cortex_BA9	4483	9	0.957176	1	ENSG00000159640:ENSG00000121691:ENSG00000197635:ENSG00000105655:ENSG00000115548:ENSG00000147592:ENSG00000137509:ENSG00000130529:ENSG00000069667
DEG.down	Brain_Hippocampus	6868	12	0.997348	1	ENSG00000159640:ENSG00000121691:ENSG00000105655:ENSG00000115548:ENSG00000147592:ENSG00000160191:ENSG00000143190:ENSG00000137509:ENSG00000140199:ENSG00000160190:ENSG00000130529:ENSG00000069667
DEG.down	Brain_Hypothalamus	5355	8	0.997689	1	ENSG00000159640:ENSG00000121691:ENSG00000115548:ENSG00000143190:ENSG00000137509:ENSG00000140199:ENSG00000130529:ENSG00000069667
DEG.down	Brain_Nucleus_accumbens_basal_ganglia	5859	9	0.998214	1	ENSG00000118137:ENSG00000121691:ENSG00000115548:ENSG00000147592:ENSG00000196549:ENSG00000137509:ENSG00000140199:ENSG00000130529:ENSG00000069667
DEG.down	Brain_Putamen_basal_ganglia	7145	10	0.999861	1	ENSG00000121691:ENSG00000105655:ENSG00000115548:ENSG00000147592:ENSG00000143190:ENSG00000137509:ENSG00000140199:ENSG00000160190:ENSG00000130529:ENSG00000069667
DEG.down	Brain_Spinal_cord_cervical_c-1	4587	7	0.994265	1	ENSG00000159640:ENSG00000197635:ENSG00000105655:ENSG00000115548:ENSG00000160190:ENSG00000130529:ENSG00000069667
DEG.down	Brain_Substantia_nigra	6536	9	0.999738	1	ENSG00000121691:ENSG00000105655:ENSG00000115548:ENSG00000143190:ENSG00000137509:ENSG00000140199:ENSG00000160190:ENSG00000130529:ENSG00000069667
DEG.down	Breast_Mammary_Tissue	918	4	0.315023	1	ENSG00000135744:ENSG00000136872:ENSG00000118137:ENSG00000163586
DEG.down	Cells_Cultured_fibroblasts	1736	6	0.450711	1	ENSG00000135744:ENSG00000105655:ENSG00000115548:ENSG00000160191:ENSG00000143190:ENSG00000069667
DEG.down	Cells_EBV-transformed_lymphocytes	2077	4	0.897113	1	ENSG00000174775:ENSG00000105655:ENSG00000160191:ENSG00000137509
DEG.down	Cervix_Ectocervix	2	0	1	1
DEG.down	Cervix_Endocervix	5	0	1	1
DEG.down	Colon_Sigmoid	1538	5	0.521226	1	ENSG00000130234:ENSG00000135744:ENSG00000118137:ENSG00000015413:ENSG00000165105
DEG.down	Colon_Transverse	1407	5	0.441352	1	ENSG00000135744:ENSG00000118137:ENSG00000182795:ENSG00000140199:ENSG00000069667
DEG.down	Esophagus_Gastroesophageal_Junction	1417	3	0.82413	1	ENSG00000197635:ENSG00000140199:ENSG00000160190
DEG.down	Esophagus_Mucosa	3139	8	0.776881	1	ENSG00000159640:ENSG00000135744:ENSG00000136872:ENSG00000121691:ENSG00000197635:ENSG00000157017:ENSG00000160191:ENSG00000143365
DEG.down	Esophagus_Muscularis	1591	6	0.368321	1	ENSG00000136872:ENSG00000118137:ENSG00000197635:ENSG00000196549:ENSG00000140199:ENSG00000160190
DEG.down	Fallopian_Tube	1	0	1	1
DEG.down	Heart_Atrial_Appendage	7428	9	0.999986	1	ENSG00000159640:ENSG00000174775:ENSG00000115548:ENSG00000160191:ENSG00000143190:ENSG00000140199:ENSG00000160190:ENSG00000143365:ENSG00000069667
DEG.down	Heart_Left_Ventricle	8588	12	0.999985	1	ENSG00000159640:ENSG00000197635:ENSG00000174775:ENSG00000115548:ENSG00000196549:ENSG00000160191:ENSG00000143190:ENSG00000137509:ENSG00000140199:ENSG00000160190:ENSG00000130529:ENSG00000069667
DEG.down	Kidney_Cortex	5070	5	0.999895	1	ENSG00000182795:ENSG00000115548:ENSG00000143190:ENSG00000140199:ENSG00000069667
DEG.down	Kidney_Medulla	0	0	1	1
DEG.down	Liver	7257	9	0.999974	1	ENSG00000174775:ENSG00000105655:ENSG00000115548:ENSG00000160191:ENSG00000143190:ENSG00000137509:ENSG00000140199:ENSG00000160190:ENSG00000130529
DEG.down	Lung	825	4	0.250402	1	ENSG00000135744:ENSG00000136872:ENSG00000118137:ENSG00000015413
DEG.down	Minor_Salivary_Gland	1674	2	0.970707	1	ENSG00000135744:ENSG00000196549
DEG.down	Muscle_Skeletal	6154	10	0.997669	1	ENSG00000159640:ENSG00000197635:ENSG00000105655:ENSG00000115548:ENSG00000160191:ENSG00000143190:ENSG00000137509:ENSG00000140199:ENSG00000160190:ENSG00000130529
DEG.down	Nerve_Tibial	788	6	0.0340267	1	ENSG00000130234:ENSG00000136872:ENSG00000163586:ENSG00000160190:ENSG00000204385:ENSG00000069667
DEG.down	Ovary	1444	5	0.464258	1	ENSG00000159640:ENSG00000135744:ENSG00000160191:ENSG00000204385:ENSG00000130529
DEG.down	Pancreas	8739	13	0.999968	1	ENSG00000159640:ENSG00000135744:ENSG00000197635:ENSG00000174775:ENSG00000115548:ENSG00000147592:ENSG00000160191:ENSG00000143190:ENSG00000137509:ENSG00000140199:ENSG00000160190:ENSG00000130529:ENSG00000069667
DEG.down	Pituitary	1762	2	0.977243	1	ENSG00000121691:ENSG00000130529
DEG.down	Prostate	700	4	0.16983	1	ENSG00000130234:ENSG00000118137:ENSG00000140199:ENSG00000069667
DEG.down	Skin_Not_Sun_Exposed_Suprapubic	2344	4	0.942775	1	ENSG00000159640:ENSG00000135744:ENSG00000196549:ENSG00000204385
DEG.down	Skin_Sun_Exposed_Lower_leg	2136	3	0.96809	1	ENSG00000135744:ENSG00000196549:ENSG00000165105
DEG.down	Small_Intestine_Terminal_Ileum	1259	0	1	1
DEG.down	Spleen	1936	8	0.244927	1	ENSG00000159640:ENSG00000135744:ENSG00000118137:ENSG00000163586:ENSG00000204385:ENSG00000130529:ENSG00000143365:ENSG00000069667
DEG.down	Stomach	2301	8	0.418418	1	ENSG00000135744:ENSG00000015413:ENSG00000197635:ENSG00000105655:ENSG00000115548:ENSG00000137509:ENSG00000140199:ENSG00000069667
DEG.down	Testis	2631	6	0.841635	1	ENSG00000135744:ENSG00000182795:ENSG00000121691:ENSG00000197635:ENSG00000196549:ENSG00000160191
DEG.down	Thyroid	980	3	0.589679	1	ENSG00000015413:ENSG00000197635:ENSG00000196549
DEG.down	Uterus	791	3	0.444409	1	ENSG00000130234:ENSG00000135744:ENSG00000196549
DEG.down	Vagina	600	2	0.557496	1	ENSG00000135744:ENSG00000118137
DEG.down	Whole_Blood	6350	9	0.999546	1	ENSG00000127837:ENSG00000118137:ENSG00000174775:ENSG00000105655:ENSG00000147592:ENSG00000143190:ENSG00000160190:ENSG00000143365:ENSG00000069667
DEG.twoside	Adipose_Subcutaneous	3024	8	0.738249	1	ENSG00000159640:ENSG00000130234:ENSG00000135744:ENSG00000197635:ENSG00000196549:ENSG00000137509:ENSG00000143365:ENSG00000116833
DEG.twoside	Adipose_Visceral_Omentum	2847	9	0.526502	1	ENSG00000130234:ENSG00000136872:ENSG00000118137:ENSG00000197635:ENSG00000196549:ENSG00000160190:ENSG00000204385:ENSG00000143365:ENSG00000116833
DEG.twoside	Adrenal_Gland	4221	12	0.679181	1	ENSG00000159640:ENSG00000136872:ENSG00000174775:ENSG00000115548:ENSG00000147592:ENSG00000137509:ENSG00000140199:ENSG00000204385:ENSG00000130529:ENSG00000143365:ENSG00000136931:ENSG00000069667
DEG.twoside	Artery_Aorta	3444	11	0.504896	1	ENSG00000159640:ENSG00000130234:ENSG00000135744:ENSG00000118137:ENSG00000197635:ENSG00000105655:ENSG00000196549:ENSG00000160191:ENSG00000140199:ENSG00000160190:ENSG00000130529
DEG.twoside	Artery_Coronary	2472	6	0.793666	1	ENSG00000135744:ENSG00000136872:ENSG00000015413:ENSG00000197635:ENSG00000105655:ENSG00000160191
DEG.twoside	Artery_Tibial	3940	9	0.886541	1	ENSG00000159640:ENSG00000135744:ENSG00000197635:ENSG00000105655:ENSG00000115548:ENSG00000196549:ENSG00000160191:ENSG00000160190:ENSG00000198963
DEG.twoside	Bladder	833	1	0.928543	1	ENSG00000160191
DEG.twoside	Brain_Amygdala	8497	14	0.999779	1	ENSG00000159640:ENSG00000135744:ENSG00000121691:ENSG00000105655:ENSG00000115548:ENSG00000147592:ENSG00000133636:ENSG00000143190:ENSG00000137509:ENSG00000140199:ENSG00000160190:ENSG00000130529:ENSG00000069667:ENSG00000198963
DEG.twoside	Brain_Anterior_cingulate_cortex_BA24	7935	13	0.9996	1	ENSG00000159640:ENSG00000135744:ENSG00000121691:ENSG00000105655:ENSG00000115548:ENSG00000147592:ENSG00000143190:ENSG00000137509:ENSG00000140199:ENSG00000160190:ENSG00000130529:ENSG00000069667:ENSG00000198963
DEG.twoside	Brain_Caudate_basal_ganglia	7938	11	0.999962	1	ENSG00000135744:ENSG00000121691:ENSG00000115548:ENSG00000147592:ENSG00000133636:ENSG00000137509:ENSG00000140199:ENSG00000160190:ENSG00000130529:ENSG00000069667:ENSG00000198963
DEG.twoside	Brain_Cerebellar_Hemisphere	6680	9	0.999831	1	ENSG00000159640:ENSG00000135744:ENSG00000121691:ENSG00000105655:ENSG00000147592:ENSG00000160191:ENSG00000143190:ENSG00000137509:ENSG00000130529
DEG.twoside	Brain_Cerebellum	6590	10	0.999282	1	ENSG00000159640:ENSG00000135744:ENSG00000118137:ENSG00000121691:ENSG00000105655:ENSG00000147592:ENSG00000160191:ENSG00000143190:ENSG00000160190:ENSG00000130529
DEG.twoside	Brain_Cortex	7175	10	0.999874	1	ENSG00000159640:ENSG00000135744:ENSG00000121691:ENSG00000115548:ENSG00000147592:ENSG00000137509:ENSG00000140199:ENSG00000130529:ENSG00000069667:ENSG00000198963
DEG.twoside	Brain_Frontal_Cortex_BA9	6912	11	0.999135	1	ENSG00000159640:ENSG00000135744:ENSG00000121691:ENSG00000197635:ENSG00000105655:ENSG00000115548:ENSG00000147592:ENSG00000137509:ENSG00000130529:ENSG00000069667:ENSG00000198963
DEG.twoside	Brain_Hippocampus	8414	14	0.999715	1	ENSG00000159640:ENSG00000135744:ENSG00000121691:ENSG00000105655:ENSG00000115548:ENSG00000147592:ENSG00000133636:ENSG00000160191:ENSG00000143190:ENSG00000137509:ENSG00000140199:ENSG00000160190:ENSG00000130529:ENSG00000069667
DEG.twoside	Brain_Hypothalamus	7340	11	0.999748	1	ENSG00000159640:ENSG00000135744:ENSG00000121691:ENSG00000115548:ENSG00000133636:ENSG00000143190:ENSG00000137509:ENSG00000140199:ENSG00000130529:ENSG00000069667:ENSG00000198963
DEG.twoside	Brain_Nucleus_accumbens_basal_ganglia	7698	11	0.999917	1	ENSG00000135744:ENSG00000118137:ENSG00000121691:ENSG00000115548:ENSG00000147592:ENSG00000196549:ENSG00000137509:ENSG00000140199:ENSG00000130529:ENSG00000069667:ENSG00000198963
DEG.twoside	Brain_Putamen_basal_ganglia	8495	12	0.999979	1	ENSG00000135744:ENSG00000121691:ENSG00000105655:ENSG00000115548:ENSG00000147592:ENSG00000143190:ENSG00000137509:ENSG00000140199:ENSG00000160190:ENSG00000130529:ENSG00000069667:ENSG00000198963
DEG.twoside	Brain_Spinal_cord_cervical_c-1	6207	9	0.999315	1	ENSG00000159640:ENSG00000135744:ENSG00000197635:ENSG00000105655:ENSG00000115548:ENSG00000133636:ENSG00000160190:ENSG00000130529:ENSG00000069667
DEG.twoside	Brain_Substantia_nigra	7817	11	0.999944	1	ENSG00000135744:ENSG00000121691:ENSG00000105655:ENSG00000115548:ENSG00000133636:ENSG00000143190:ENSG00000137509:ENSG00000140199:ENSG00000160190:ENSG00000130529:ENSG00000069667
DEG.twoside	Breast_Mammary_Tissue	2359	10	0.185994	1	ENSG00000130234:ENSG00000135744:ENSG00000136872:ENSG00000118137:ENSG00000197635:ENSG00000163586:ENSG00000196549:ENSG00000165105:ENSG00000204385:ENSG00000116833
DEG.twoside	Cells_Cultured_fibroblasts	5428	11	0.970758	1	ENSG00000135744:ENSG00000197635:ENSG00000105655:ENSG00000115548:ENSG00000147592:ENSG00000196549:ENSG00000160191:ENSG00000143190:ENSG00000137509:ENSG00000069667:ENSG00000172061
DEG.twoside	Cells_EBV-transformed_lymphocytes	5943	10	0.996023	1	ENSG00000174775:ENSG00000105655:ENSG00000147592:ENSG00000160191:ENSG00000143190:ENSG00000137509:ENSG00000125255:ENSG00000140199:ENSG00000160190:ENSG00000137251
DEG.twoside	Cervix_Ectocervix	191	1	0.447957	1	ENSG00000105655
DEG.twoside	Cervix_Endocervix	1746	1	0.99659	1	ENSG00000105655
DEG.twoside	Colon_Sigmoid	2807	11	0.242196	1	ENSG00000130234:ENSG00000135744:ENSG00000118137:ENSG00000016490:ENSG00000015413:ENSG00000163586:ENSG00000145384:ENSG00000184434:ENSG00000112818:ENSG00000160191:ENSG00000165105
DEG.twoside	Esophagus_Gastroesophageal_Junction	2434	4	0.953497	1	ENSG00000197635:ENSG00000160191:ENSG00000140199:ENSG00000160190
DEG.twoside	Esophagus_Mucosa	4906	13	0.785732	1	ENSG00000159640:ENSG00000135744:ENSG00000136872:ENSG00000182795:ENSG00000121691:ENSG00000197635:ENSG00000157017:ENSG00000160191:ENSG00000165105:ENSG00000140199:ENSG00000160190:ENSG00000184012:ENSG00000143365
DEG.twoside	Esophagus_Muscularis	2638	7	0.724942	1	ENSG00000136872:ENSG00000118137:ENSG00000197635:ENSG00000196549:ENSG00000160191:ENSG00000140199:ENSG00000160190
DEG.twoside	Fallopian_Tube	457	1	0.761217	1	ENSG00000105655
DEG.twoside	Heart_Atrial_Appendage	8002	13	0.999671	1	ENSG00000159640:ENSG00000130234:ENSG00000135744:ENSG00000118137:ENSG00000174775:ENSG00000115548:ENSG00000160191:ENSG00000138308:ENSG00000143190:ENSG00000140199:ENSG00000160190:ENSG00000143365:ENSG00000069667
DEG.twoside	Heart_Left_Ventricle	8983	15	0.999852	1	ENSG00000159640:ENSG00000130234:ENSG00000135744:ENSG00000118137:ENSG00000197635:ENSG00000174775:ENSG00000115548:ENSG00000196549:ENSG00000160191:ENSG00000143190:ENSG00000137509:ENSG00000140199:ENSG00000160190:ENSG00000130529:ENSG00000069667
DEG.twoside	Kidney_Cortex	6031	21	0.294176	1	ENSG00000130234:ENSG00000136872:ENSG00000182795:ENSG00000015413:ENSG00000197635:ENSG00000163586:ENSG00000115548:ENSG00000147592:ENSG00000184434:ENSG00000196549:ENSG00000138308:ENSG00000143190:ENSG00000125255:ENSG00000140199:ENSG00000138079:ENSG00000204385:ENSG00000174358:ENSG00000137251:ENSG00000147003:ENSG00000184012:ENSG00000069667
DEG.twoside	Kidney_Medulla	93	1	0.250614	1	ENSG00000105655
DEG.twoside	Liver	8356	20	0.956117	1	ENSG00000135744:ENSG00000136872:ENSG00000118137:ENSG00000163586:ENSG00000174775:ENSG00000105655:ENSG00000009765:ENSG00000115548:ENSG00000147592:ENSG00000160191:ENSG00000138308:ENSG00000143190:ENSG00000137509:ENSG00000140199:ENSG00000160190:ENSG00000147003:ENSG00000184012:ENSG00000130529:ENSG00000143365:ENSG00000116833
DEG.twoside	Lung	3891	13	0.426174	1	ENSG00000159640:ENSG00000135744:ENSG00000136872:ENSG00000118137:ENSG00000182795:ENSG00000015413:ENSG00000197635:ENSG00000196549:ENSG00000165105:ENSG00000140199:ENSG00000204385:ENSG00000184012:ENSG00000130529
DEG.twoside	Minor_Salivary_Gland	2966	9	0.579521	1	ENSG00000135744:ENSG00000182795:ENSG00000196549:ENSG00000165105:ENSG00000160190:ENSG00000204385:ENSG00000184012:ENSG00000130529:ENSG00000143365
DEG.twoside	Muscle_Skeletal	7033	12	0.998266	1	ENSG00000159640:ENSG00000197635:ENSG00000105655:ENSG00000115548:ENSG00000160191:ENSG00000143190:ENSG00000137509:ENSG00000140199:ENSG00000160190:ENSG00000130529:ENSG00000143365:ENSG00000069667
DEG.twoside	Nerve_Tibial	4977	12	0.879479	1	ENSG00000130234:ENSG00000136872:ENSG00000118137:ENSG00000163586:ENSG00000105655:ENSG00000115548:ENSG00000196549:ENSG00000160191:ENSG00000143190:ENSG00000160190:ENSG00000204385:ENSG00000069667
DEG.twoside	Ovary	5141	10	0.975486	1	ENSG00000159640:ENSG00000135744:ENSG00000118137:ENSG00000105655:ENSG00000160191:ENSG00000143190:ENSG00000204385:ENSG00000147003:ENSG00000130529:ENSG00000136931
DEG.twoside	Pancreas	9289	20	0.99336	1	ENSG00000159640:ENSG00000135744:ENSG00000136872:ENSG00000015413:ENSG00000197635:ENSG00000174775:ENSG00000115548:ENSG00000147592:ENSG00000160191:ENSG00000143190:ENSG00000137509:ENSG00000165105:ENSG00000140199:ENSG00000160190:ENSG00000138079:ENSG00000184012:ENSG00000130529:ENSG00000143365:ENSG00000116833:ENSG00000069667
DEG.twoside	Pituitary	5035	12	0.88966	1	ENSG00000159640:ENSG00000136872:ENSG00000121691:ENSG00000105655:ENSG00000133636:ENSG00000165105:ENSG00000160190:ENSG00000204385:ENSG00000130529:ENSG00000143365:ENSG00000136931:ENSG00000198963
DEG.twoside	Skin_Not_Sun_Exposed_Suprapubic	4398	10	0.902747	1	ENSG00000159640:ENSG00000135744:ENSG00000182795:ENSG00000115548:ENSG00000196549:ENSG00000204385:ENSG00000130529:ENSG00000143365:ENSG00000069667:ENSG00000172061
DEG.twoside	Skin_Sun_Exposed_Lower_leg	4319	9	0.941515	1	ENSG00000135744:ENSG00000182795:ENSG00000115548:ENSG00000196549:ENSG00000165105:ENSG00000130529:ENSG00000143365:ENSG00000069667:ENSG00000172061
DEG.twoside	Spleen	4638	15	0.469183	1	ENSG00000159640:ENSG00000135744:ENSG00000118137:ENSG00000015413:ENSG00000197635:ENSG00000163586:ENSG00000157017:ENSG00000105655:ENSG00000160191:ENSG00000140199:ENSG00000204385:ENSG00000130529:ENSG00000143365:ENSG00000136931:ENSG00000069667
DEG.twoside	Stomach	3087	16	0.0217076	1	ENSG00000135744:ENSG00000136872:ENSG00000118137:ENSG00000182795:ENSG00000015413:ENSG00000197635:ENSG00000157017:ENSG00000105655:ENSG00000115548:ENSG00000137509:ENSG00000165105:ENSG00000140199:ENSG00000204385:ENSG00000147003:ENSG00000184012:ENSG00000069667
DEG.twoside	Testis	8608	19	0.985752	1	ENSG00000159640:ENSG00000130234:ENSG00000135744:ENSG00000118137:ENSG00000182795:ENSG00000121691:ENSG00000015413:ENSG00000197635:ENSG00000105655:ENSG00000115548:ENSG00000147592:ENSG00000196549:ENSG00000160191:ENSG00000138308:ENSG00000090402:ENSG00000140199:ENSG00000160190:ENSG00000143365:ENSG00000136931
DEG.twoside	Thyroid	4735	13	0.736862	1	ENSG00000159640:ENSG00000130234:ENSG00000015413:ENSG00000197635:ENSG00000009765:ENSG00000196549:ENSG00000165105:ENSG00000160190:ENSG00000147003:ENSG00000184012:ENSG00000130529:ENSG00000143365:ENSG00000172061
DEG.twoside	Uterus	4817	6	0.999044	1	ENSG00000130234:ENSG00000135744:ENSG00000105655:ENSG00000196549:ENSG00000143190:ENSG00000116833
DEG.twoside	Vagina	2626	5	0.923454	1	ENSG00000135744:ENSG00000118137:ENSG00000182795:ENSG00000137509:ENSG00000140199
DEG.twoside	Whole_Blood	7672	11	0.99991	1	ENSG00000127837:ENSG00000118137:ENSG00000174775:ENSG00000105655:ENSG00000147592:ENSG00000196549:ENSG00000143190:ENSG00000140199:ENSG00000160190:ENSG00000143365:ENSG00000069667
[truncated: 5,000 more columns]

## Sheet: TableS3.Gene-expression-SC2
gene_symbol	category	Adjusted (pvalue)	logFC		Legend
ACE2	SC2_no_virus	1.36575e-06	1.25764		gene_symbol	Official Gene Symbol
PRCP	SC2_no_virus	0.0255205	-0.331999		category	Differential Gene Expression Analysis Category
CALM2	SC2_no_virus	0.0132418	0.368461		Adjusted (pvalue)	Adjusted p-value across genome-wide genes
RORB	SC2_no_virus	0.00145361	0.837957		logFC	log fold change of expression
NR5A2	SC2_other_virus	0.0239414	-0.54191		The data is extracted from Mick et. al (https://github.com/czbiohub/covid19-transcriptomics-pathogenesis-diagnostics-results)
CAT	SC2_other_virus	0.014961	0.356771
NTS	SC2_other_virus	0.00145442	1.28723
PRCP	SC2_other_virus	0.00672055	-0.400095
SLC12A6	SC2_other_virus	0.000759911	-0.735959
CALM2	SC2_other_virus	1.61938e-08	0.888839
FABP2	SC2_other_virus	0.0149931	-0.550036
GHRL	SC2_other_virus	0.00112978	-0.868282
SLC37A1	SC2_other_virus	0.000618001	0.596832
HRAS	SC2_other_virus	0.0458134	0.484353
C1orf116	SC2_other_virus	0.0498155	-0.439499
LRRC19	SC2_other_virus	0.00649855	0.681247
MME	SC2_other_virus	0.000525818	-1.4934
CALM1	SC2_other_virus	6.08327e-05	0.711914
RORB	SC2_other_virus	0.00386634	0.809152
SLC44A4	SC2_other_virus	0.000134753	0.818564
IYD	other_virus_no_virus	0.0109441	-0.540948
NR5A2	other_virus_no_virus	0.0114782	0.622208
CAT	other_virus_no_virus	1.78e-05	-0.63077
ACE2	other_virus_no_virus	0.00305531	0.910276
NTS	other_virus_no_virus	0.00919941	-1.08267
CALM2	other_virus_no_virus	0.000774369	-0.520378
GHRL	other_virus_no_virus	0.0177223	0.662994
SLC37A1	other_virus_no_virus	0.0382422	-0.379768
DPP4	other_virus_no_virus	0.0395437	0.690725
CALM1	other_virus_no_virus	0.000235704	-0.662145
SLC44A4	other_virus_no_virus	0.00166389	-0.689276

## Sheet: TableS4.Gene-Drug Interaction
search_term	match_term	match_type	gene	drug	interaction_types	sources	pmids
ACE	ACE	Definite	ACE	RAMIPRIL	inhibitor	TdgClinicalTrial|GuideToPharmacologyInteractions|ChemblInteractions|TEND|DrugBank	11030016|11929321|16398929|11752352
ACE	ACE	Definite	ACE	TRANDOLAPRIL	inhibitor	TdgClinicalTrial|GuideToPharmacologyInteractions|ChemblInteractions|TEND|DrugBank	11030016|11929321|11752352
ACE	ACE	Definite	ACE	CANDOXATRIL	inhibitor	TdgClinicalTrial|TEND|DrugBank	16642666|11300648
ACE	ACE	Definite	ACE	LISINOPRIL	inhibitor	PharmGKB|TdgClinicalTrial|GuideToPharmacologyInteractions|TEND|DrugBank	11030016|11929321|17618628|9506845|11752352
ACE	ACE	Definite	ACE	RESCINNAMINE	inhibitor	TdgClinicalTrial|TEND|DrugBank	16431399|11752352|17139284|17016423
ACE	ACE	Definite	ACE	CAPTOPRIL	inhibitor	PharmGKB|TdgClinicalTrial|GuideToPharmacologyInteractions|ChemblInteractions|NCI|TEND|DrugBank	2839262|16889963|2442780|3937925|11030016|11929321|3320343|17618628|3325392|3038284|15236580|20014331|7042175|6275810|11752352|12424228|12489813|2875891|9863143|8864563
ACE	ACE	Definite	ACE	CILAZAPRIL	inhibitor	TdgClinicalTrial|GuideToPharmacologyInteractions|TEND|DrugBank	10398211|10205231|1382157|1382161|11752352|10446934|18423812
ACE	ACE	Definite	ACE	SPIRAPRIL	inhibitor	TdgClinicalTrial|GuideToPharmacologyInteractions|TEND|DrugBank	11929321|16126915|12613273|11752352|20524801
ACE	ACE	Definite	ACE	TEMOCAPRIL	inhibitor	DrugBank	8513851
ACE	ACE	Definite	ACE	ZOFENOPRIL	inhibitor	GuideToPharmacologyInteractions|DrugBank	17355163
ACE	ACE	Definite	ACE	BENAZEPRIL	inhibitor	TdgClinicalTrial|GuideToPharmacologyInteractions|TEND
ACE	ACE	Definite	ACE	BENAZEPRILAT	inhibitor	GuideToPharmacologyInteractions
ACE	ACE	Definite	ACE	ENALAPRIL	inhibitor	TdgClinicalTrial|GuideToPharmacologyInteractions|TEND
ACE	ACE	Definite	ACE	ENALAPRILAT	inhibitor	GuideToPharmacologyInteractions
ACE	ACE	Definite	ACE	FASIDOTRIL	inhibitor	GuideToPharmacologyInteractions
ACE	ACE	Definite	ACE	FASIDOTRILAT	inhibitor	GuideToPharmacologyInteractions
ACE	ACE	Definite	ACE	FOSINOPRIL	inhibitor	TdgClinicalTrial|GuideToPharmacologyInteractions|TEND
ACE	ACE	Definite	ACE	IMIDAPRIL	inhibitor	PharmGKB|GuideToPharmacologyInteractions
ACE	ACE	Definite	ACE	IMIDAPRILAT	inhibitor	GuideToPharmacologyInteractions
ACE	ACE	Definite	ACE	MOEXIPRIL	inhibitor	TdgClinicalTrial|GuideToPharmacologyInteractions|TEND
ACE	ACE	Definite	ACE	PERINDOPRIL	inhibitor	TdgClinicalTrial|GuideToPharmacologyInteractions|TEND
ACE	ACE	Definite	ACE	PERINDOPRILAT	inhibitor	GuideToPharmacologyInteractions
ACE	ACE	Definite	ACE	QUINAPRILAT	inhibitor	GuideToPharmacologyInteractions
ACE	ACE	Definite	ACE	RAMIPRILAT	inhibitor	GuideToPharmacologyInteractions
ACE	ACE	Definite	ACE	CHEMBL1235767	inhibitor	GuideToPharmacologyInteractions
ACE	ACE	Definite	ACE	SPIRAPRILAT	inhibitor	GuideToPharmacologyInteractions
ACE	ACE	Definite	ACE	TRANDOLAPRILAT	inhibitor	GuideToPharmacologyInteractions
ACE	ACE	Definite	ACE	MOEXIPRIL HYDROCHLORIDE	inhibitor	ChemblInteractions
ACE	ACE	Definite	ACE	ENALAPRILAT HYDRATE	inhibitor	ChemblInteractions
ACE	ACE	Definite	ACE	ENALAPRIL MALEATE	inhibitor	ChemblInteractions|NCI	3038326
ACE	ACE	Definite	ACE	SPIRAPRIL HYDROCHLORIDE	inhibitor	ChemblInteractions
ACE	ACE	Definite	ACE	PERINDOPRIL ERBUMINE	inhibitor	ChemblInteractions
ACE	ACE	Definite	ACE	LISINOPRIL HYDRATE	inhibitor	ChemblInteractions
ACE	ACE	Definite	ACE	PERINDOPRIL ARGININE	inhibitor	ChemblInteractions
ACE	ACE	Definite	ACE	QUINAPRIL HYDROCHLORIDE	inhibitor	ChemblInteractions
ACE	ACE	Definite	ACE	FOSINOPRIL SODIUM	inhibitor	ChemblInteractions
ACE	ACE	Definite	ACE	BENAZEPRIL HYDROCHLORIDE	inhibitor	ChemblInteractions
ACE	ACE	Definite	ACE	VASOPRESSIN		NCI	6289972
ACE	ACE	Definite	ACE	DESERPIDINE		TdgClinicalTrial|TEND
ACE	ACE	Definite	ACE	INDOMETHACIN		NCI	3937925
ACE	ACE	Definite	ACE	SPIRONOLACTONE		PharmGKB
ACE	ACE	Definite	ACE	OMAPATRILAT		DrugBank	11588409|10598120|12584671|10856268|12487427
ACE	ACE	Definite	ACE	QUINAPRIL		TdgClinicalTrial|TEND
ACE	ACE	Definite	ACE	CHEMBL3187812		TdgClinicalTrial
ACE	ACE	Definite	ACE	HYDROCHLOROTHIAZIDE		PharmGKB
ACE2	ACE2	Definite	ACE2	LISINOPRIL	inhibitor	TdgClinicalTrial|DrugBank	11030016|11929321|11752352|1536695
ACE2	ACE2	Definite	ACE2	CHEMBL260273	inhibitor	GuideToPharmacologyInteractions
ACE2	ACE2	Definite	ACE2	CHEMBL429844	inhibitor	GuideToPharmacologyInteractions
ACE2	ACE2	Definite	ACE2	FLUTAMIDE		GuideToPharmacologyInteractions
AGT	AGT	Definite	AGT	QUINAPRIL		NCI	12693379|11849656
AGT	AGT	Definite	AGT	SPARSENTAN		DrugBank
AGT	AGT	Definite	AGT	CYCLOSPORINE		NCI	10642325
AGT	AGT	Definite	AGT	ENALAPRIL		NCI	11928713
AGT	AGT	Definite	AGT	MESTRANOL		NCI	3023023
AGT	AGT	Definite	AGT	HYDROCHLOROTHIAZIDE		PharmGKB
AGT	AGT	Definite	AGT	HYDROCORTISONE		NCI	15576665
ALDOB	ALDOB	Definite	ALDOB	CHEMBL1232920		DrugBank	10592235|17139284|17016423
ALDOB	ALDOB	Definite	ALDOB	CHEMBL1161998		DrugBank	10592235|17139284|17016423
APOA1	APOA1	Definite	APOA1	LAMIVUDINE		NCI	17538878
APOA1	APOA1	Definite	APOA1	GLUCAGON		NCI	3130065
APOA1	APOA1	Definite	APOA1	ALCOHOL		NCI	10956052
APOA1	APOA1	Definite	APOA1	RITONAVIR		PharmGKB
APOA1	APOA1	Definite	APOA1	FUROSEMIDE		NCI	1446618
APOA1	APOA1	Definite	APOA1	TESTOSTERONE		NCI	1764091
APOA1	APOA1	Definite	APOA1	TRETINOIN		NCI	9392425
APOA1	APOA1	Definite	APOA1	APABETALONE		TdgClinicalTrial
APOA1	APOA1	Definite	APOA1	FENOFIBRATE		PharmGKB
CALM1	CALM1	Definite	CALM1	DIBUCAINE	inhibitor	DrugBank	6140014|6262771|7680317|8382768
CALM1	CALM1	Definite	CALM1	PERPHENAZINE	inhibitor	DrugBank	12366848|2885243|11409178|10516112
CALM1	CALM1	Definite	CALM1	FELODIPINE	other	DrugBank	2964559|2442519|2933041|3178884|4074665|2833901
CALM1	CALM1	Definite	CALM1	PIMOZIDE	inhibitor	DrugBank	2120879|1965307|2386945|3134891|6146939
CALM1	CALM1	Definite	CALM1	NIFEDIPINE	inhibitor	DrugBank	2933041
CALM1	CALM1	Definite	CALM1	BEPRIDIL	binder	TEND|DrugBank	2964559|2933041
CALM1	CALM1	Definite	CALM1	APRINDINE	inhibitor	TEND|DrugBank	6186851
CALM1	CALM1	Definite	CALM1	PRENYLAMINE		DrugBank	2933041
CALM1	CALM1	Definite	CALM1	FLUNARIZINE		TEND|DrugBank	17139284|17016423
CALM1	CALM1	Definite	CALM1	MELATONIN		DrugBank	15229223|19463840
CALM1	CALM1	Definite	CALM1	TRIMETHYLLYSINE		DrugBank	10592235|17139284|17016423
CALM1	CALM1	Definite	CALM1	TERT-BUTANOL		DrugBank	17139284|17016423
CALM1	CALM1	Definite	CALM1	MYRISTIC ACID		DrugBank	10592235
CALM1	CALM1	Definite	CALM1	CHEMBL605003		DrugBank	10592235
CALM1	CALM1	Definite	CALM1	CHEMBL41631		DrugBank	10592235
CAT	CAT	Definite	CAT	FOMEPIZOLE	inhibitor	DrugBank	240743|3416882|8423764
CLCA1	CLCA1	Definite	CLCA1	TALNIFLUMATE		TdgClinicalTrial
DEFA5	DEFA5	Definite	DEFA5	VOLANESORSEN SODIUM		NCI	9169780
DPEP1	DPEP1	Definite	DPEP1	CILASTATIN	inhibitor	TdgClinicalTrial|TEND|DrugBank|TTD	2571484|3474745|3780719|3480361|3038022|7492120|9573653|11752352|17139284|17016423
DPEP1	DPEP1	Definite	DPEP1	CILASTATIN SODIUM	inhibitor	ChemblInteractions
DPEP1	DPEP1	Definite	DPEP1	DEXAMETHASONE		NCI	9806799
DPP4	DPP4	Definite	DPP4	SAXAGLIPTIN HYDROCHLORIDE	inhibitor	ChemblInteractions
DPP4	DPP4	Definite	DPP4	CARMEGLIPTIN	inhibitor	ChemblInteractions
DPP4	DPP4	Definite	DPP4	VILDAGLIPTIN	inhibitor	TdgClinicalTrial|GuideToPharmacologyInteractions|ChemblInteractions|DrugBank|TTD	8100523|15562200|19149538
DPP4	DPP4	Definite	DPP4	BEGELOMAB	antibody|inhibitor	GuideToPharmacologyInteractions|ChemblInteractions
DPP4	DPP4	Definite	DPP4	ALOGLIPTIN	inhibitor	TdgClinicalTrial|GuideToPharmacologyInteractions|DrugBank|TTD
DPP4	DPP4	Definite	DPP4	DESERPIDINE	inhibitor	GuideToPharmacologyInteractions
DPP4	DPP4	Definite	DPP4	LINAGLIPTIN	inhibitor	GuideToPharmacologyInteractions|ChemblInteractions|DrugBank|TTD	22149370
DPP4	DPP4	Definite	DPP4	OMARIGLIPTIN	inhibitor	GuideToPharmacologyInteractions|ChemblInteractions
DPP4	DPP4	Definite	DPP4	SAXAGLIPTIN	inhibitor	TdgClinicalTrial|GuideToPharmacologyInteractions|TEND|DrugBank|TTD	16033281|10592235
DPP4	DPP4	Definite	DPP4	SITAGLIPTIN	inhibitor	TdgClinicalTrial|GuideToPharmacologyInteractions|TEND
DPP4	DPP4	Definite	DPP4	CHEMBL386369	inhibitor	TTD
DPP4	DPP4	Definite	DPP4	CHEMBL1672127	inhibitor	TTD
DPP4	DPP4	Definite	DPP4	DENAGLIPTIN	inhibitor	TTD
DPP4	DPP4	Definite	DPP4	CHEMBL77538	inhibitor	TTD
DPP4	DPP4	Definite	DPP4	GOSOGLIPTIN	inhibitor	ChemblInteractions|DrugBank	10592235
DPP4	DPP4	Definite	DPP4	TRELAGLIPTIN SUCCINATE	inhibitor	ChemblInteractions
DPP4	DPP4	Definite	DPP4	ALOGLIPTIN BENZOATE	inhibitor	ChemblInteractions
DPP4	DPP4	Definite	DPP4	SITAGLIPTIN PHOSPHATE	inhibitor	ChemblInteractions
DPP4	DPP4	Definite	DPP4	CHEMBL34062		DrugBank	10592235|17139284|17016423
DPP4	DPP4	Definite	DPP4	CHEMBL374936		DrugBank	10592235
DPP4	DPP4	Definite	DPP4	CHEMBL63895		DrugBank	10592235
DPP4	DPP4	Definite	DPP4	CHEMBL383705		DrugBank	10592235|17139284|17016423
DPP4	DPP4	Definite	DPP4	CHEMBL233360		DrugBank	10592235
DPP4	DPP4	Definite	DPP4	CHEMBL452289		DrugBank	10592235
DPP4	DPP4	Definite	DPP4	CHEMBL385711		DrugBank	10592235
DPP4	DPP4	Definite	DPP4	CHEMBL525028		DrugBank	10592235
DPP4	DPP4	Definite	DPP4	CHEMBL227954		DrugBank	10592235
DPP4	DPP4	Definite	DPP4	ENALAPRIL		NCI	16678199
DPP4	DPP4	Definite	DPP4	CHEMBL237786		DrugBank	10592235
DPP4	DPP4	Definite	DPP4	CHEMBL237337		DrugBank	10592235
DPP4	DPP4	Definite	DPP4	CHEMBL1230044		DrugBank	10592235
DPP4	DPP4	Definite	DPP4	CHEMBL257036		DrugBank	10592235
DPP4	DPP4	Definite	DPP4	CHEMBL1232261		DrugBank	10592235
DPP4	DPP4	Definite	DPP4	CHEMBL1230763		DrugBank	10592235
DPP4	DPP4	Definite	DPP4	CAPTOPRIL		NCI	17531305
DPP4	DPP4	Definite	DPP4	CHEMBL1234200		DrugBank	10592235
DPP4	DPP4	Definite	DPP4	CHEMBL272114		DrugBank	10592235
DPP4	DPP4	Definite	DPP4	CHEMBL225210		DrugBank	10592235
DPP4	DPP4	Definite	DPP4	CHEMBL1197118		DrugBank	10592235
DPP4	DPP4	Definite	DPP4	CHEMBL425584		DrugBank	10592235
DPP4	DPP4	Definite	DPP4	CHEMBL218289		DrugBank	10592235
DPP4	DPP4	Definite	DPP4	CHEMBL1230015		DrugBank	10592235
DPP4	DPP4	Definite	DPP4	CHEMBL217271		DrugBank	10592235
DPP4	DPP4	Definite	DPP4	CHEMBL381806		DrugBank	10592235
DPP4	DPP4	Definite	DPP4	CHEMBL235134		DrugBank	10592235
DPP4	DPP4	Definite	DPP4	CHEMBL564249		DrugBank	10592235
DPP4	DPP4	Definite	DPP4	CHEMBL250787		DrugBank	10592235
DPP4	DPP4	Definite	DPP4	CHEMBL382127		DrugBank	10592235
FABP1	FABP1	Definite	FABP1	DEXAMETHASONE		NCI	15324484|15532708
FABP1	FABP1	Definite	FABP1	CLOFIBRATE		NCI	2328261
GHRL	GHRL	Definite	GHRL	RALOXIFENE		NCI	18164562
GHRL	GHRL	Definite	GHRL	PIOGLITAZONE		NCI	16682836
GHRL	GHRL	Definite	GHRL	LORAZEPAM		TdgClinicalTrial
GHRL	GHRL	Definite	GHRL	CELECOXIB		NCI	18414388
GHRL	GHRL	Definite	GHRL	ETANERCEPT		NCI	18400355
GHRL	GHRL	Definite	GHRL	SODIUM beta-NICOTINAMIDE ADENINE DINUCLEOTIDE PHOSPHATE		NCI	18197141
GHRL	GHRL	Definite	GHRL	ANAKINRA		NCI	16959954
GHRL	GHRL	Definite	GHRL	EPINEPHRINE		NCI	16527847
GHRL	GHRL	Definite	GHRL	MACIMORELIN		TdgClinicalTrial
GHRL	GHRL	Definite	GHRL	RISPERIDONE		NCI	18480685
GHRL	GHRL	Definite	GHRL	STAUROSPORINE		NCI	17187875
GHRL	GHRL	Definite	GHRL	GONADOTROPIN, CHORIONIC		NCI	17535999
GHRL	GHRL	Definite	GHRL	ROFECOXIB		NCI	16868036
HRAS	HRAS	Definite	HRAS	LONAFARNIB	inhibitor	GuideToPharmacologyInteractions
HRAS	HRAS	Definite	HRAS	DOCETAXEL		NCI	16983095
HRAS	HRAS	Definite	HRAS	STREPTOZOTOCIN		NCI	8171758
HRAS	HRAS	Definite	HRAS	PD-173074		CKB	22869148
HRAS	HRAS	Definite	HRAS	GEMCITABINE		NCI	16818479
HRAS	HRAS	Definite	HRAS	ANTIBIOTIC		NCI	9422737
HRAS	HRAS	Definite	HRAS	PANITUMUMAB		CKB	22797062
HRAS	HRAS	Definite	HRAS	E-6201		CKB	23039341
HRAS	HRAS	Definite	HRAS	EDARAVONE		NCI	3489774
HRAS	HRAS	Definite	HRAS	BEVACIZUMAB		NCI	15998951
HRAS	HRAS	Definite	HRAS	RIGOSERTIB		CKB	27104980
HRAS	HRAS	Definite	HRAS	DASATINIB		CKB	27222538
HRAS	HRAS	Definite	HRAS	N-METHYL-N-NITROSUREA		NCI	10391687
HRAS	HRAS	Definite	HRAS	DIETHYLSTILBESTROL		NCI	1980008
HRAS	HRAS	Definite	HRAS	TRIFLUOROETHANOL		DrugBank	10592235|17139284|17016423
HRAS	HRAS	Definite	HRAS	VITAMIN E		NCI	9750015|16166287
HRAS	HRAS	Definite	HRAS	BUPARLISIB		CKB	26544513
HRAS	HRAS	Definite	HRAS	PD-0325901		CIViC	26544513
HRAS	HRAS	Definite	HRAS	NITROGLYCERIN		NCI	8968066
HRAS	HRAS	Definite	HRAS	HYDROXYUREA		NCI	12041671
HRAS	HRAS	Definite	HRAS	CHEMBL35482		NCI	12883735
HRAS	HRAS	Definite	HRAS	TIPIFARNIB		CGI
HRAS	HRAS	Definite	HRAS	AZD-4547		CKB	22869148
HRAS	HRAS	Definite	HRAS	CHEMBL387187		CIViC	26561417
HRAS	HRAS	Definite	HRAS	CABOZANTINIB		CKB	27525386
HRAS	HRAS	Definite	HRAS	ALPELISIB		CKB
HRAS	HRAS	Definite	HRAS	BRYOSTATIN		NCI	16483930
HRAS	HRAS	Definite	HRAS	EPOETIN BETA		NCI	9104820
HRAS	HRAS	Definite	HRAS	BINIMETINIB		CKB	26544513
HRAS	HRAS	Definite	HRAS	1,6-HEXANEDIOL		DrugBank	10592235|17139284|17016423
HRAS	HRAS	Definite	HRAS	SELUMETINIB		CKB|CIViC	26544513|27222538
HRAS	HRAS	Definite	HRAS	DIMETHYL SULFOXIDE		NCI	3856429
HRAS	HRAS	Definite	HRAS	GUANOSINE TRIPHOSPHATE		DrugBank	10592235|17139284|17016423
HRAS	HRAS	Definite	HRAS	AZD-8055		CKB|CIViC	26544513
HRAS	HRAS	Definite	HRAS	CHEMBL384759		DrugBank	10592235|17139284|17016423
HRAS	HRAS	Definite	HRAS	DACTOLISIB		CKB	21831957
HRAS	HRAS	Definite	HRAS	HEXAMETHYLENEBISACETAMIDE		NCI	3856429
HRAS	HRAS	Definite	HRAS	SIROLIMUS		CKB	26882569
HRAS	HRAS	Definite	HRAS	MK-2206		CKB	21289267
HRAS	HRAS	Definite	HRAS	EVEROLIMUS		CKB|CIViC	26544513
HRAS	HRAS	Definite	HRAS	METFORMIN		CKB	26921394|26951660
HRAS	HRAS	Definite	HRAS	CHEMBL1221512		NCI	9515813
HRAS	HRAS	Definite	HRAS	CETUXIMAB		CKB	22797062
HRAS	HRAS	Definite	HRAS	SF-1126		CKB	25425962
HRAS	HRAS	Definite	HRAS	TRAMETINIB		CKB	26343583|28783719|26882569|27222538
HRAS	HRAS	Definite	HRAS	CI-1040		CKB	26267534
ISYNA1	ISYNA1	Definite	ISYNA1	GLYCERIN		DrugBank	10592235|17139284|17016423
KDM3A	KDM3A	Definite	KDM3A	VASOPRESSIN TANNATE	inhibitor	GuideToPharmacologyInteractions
MME	MME	Definite	MME	CANDOXATRIL	inhibitor	TdgClinicalTrial|GuideToPharmacologyInteractions|TEND|DrugBank|TTD	16025254|1386491|16449355|11752352|7511759|1315825
MME	MME	Definite	MME	PHOSPHORAMIDON	inhibitor	DrugBank	11752352
MME	MME	Definite	MME	THIORPHAN	inhibitor	GuideToPharmacologyInteractions|DrugBank	11752352
MME	MME	Definite	MME	SACUBITRIL	antagonist|inhibitor	ChemblInteractions|DrugBank
MME	MME	Definite	MME	CANDOXATRILAT	inhibitor	GuideToPharmacologyInteractions|DrugBank	2611529|16085334
MME	MME	Definite	MME	CARTEOLOL	inhibitor	GuideToPharmacologyInteractions
MME	MME	Definite	MME	DAGLUTRIL	inhibitor	GuideToPharmacologyInteractions|DrugBank|TTD
MME	MME	Definite	MME	FASIDOTRIL	inhibitor	GuideToPharmacologyInteractions
MME	MME	Definite	MME	FASIDOTRILAT	inhibitor	GuideToPharmacologyInteractions
MME	MME	Definite	MME	OMAPATRILAT	inhibitor	DrugBank|TTD	10856267|11041166|10856268|10933361|11040230
MME	MME	Definite	MME	CHEMBL3307195	inhibitor	TdgClinicalTrial|TTD
MME	MME	Definite	MME	CHEMBL3187812		TdgClinicalTrial
MME	MME	Definite	MME	SONEPIPRAZOLE		DrugBank	10592235|17139284|17016423
NTS	NTS	Definite	NTS	NORETHINDRONE		NCI	11495683
NTS	NTS	Definite	NTS	LITHIUM		NCI	7992199
NTS	NTS	Definite	NTS	RISPERIDONE		NCI	10991962
NTS	NTS	Definite	NTS	NIFEDIPINE		NCI	8770786
NTS	NTS	Definite	NTS	CHLORPROMAZINE		NCI	1980851
NTS	NTS	Definite	NTS	MAGNESIUM SULFATE		NCI	1758237
NTS	NTS	Definite	NTS	ALCOHOL		NCI	9023306|1733422|1686369
NTS	NTS	Definite	NTS	AZASERINE		NCI	1993548
PDE9A	PDE9A	Definite	PDE9A	DIPYRIDAMOLE	inhibitor	ChemblInteractions
PDE9A	PDE9A	Definite	PDE9A	ZAPRINAST	inhibitor	GuideToPharmacologyInteractions
PDE9A	PDE9A	Definite	PDE9A	PENTOXIFYLLINE	inhibitor	ChemblInteractions
PDE9A	PDE9A	Definite	PDE9A	ISOBUTYLMETHYLXANTHINE		DrugBank	10592235
SI	SI	Definite	SI	ACARBOSE	inhibitor	TdgClinicalTrial|TEND|DrugBank	16169004|15322845|12864906|6226260|2962844
SI	SI	Definite	SI	SCOPOLAMINE	inhibitor	DrugBank	20230815
SI	SI	Definite	SI	DEXAMETHASONE		NCI	2295387
SI	SI	Definite	SI	MIFEPRISTONE		NCI	3132399
SI	SI	Definite	SI	STREPTOZOTOCIN		NCI	12940455
SI	SI	Definite	SI	SODIUM beta-NICOTINAMIDE ADENINE DINUCLEOTIDE PHOSPHATE		NCI	10712262
SLC10A2	SLC10A2	Definite	SLC10A2	CHEMBL332370	inhibitor	GuideToPharmacologyInteractions
SLC10A2	SLC10A2	Definite	SLC10A2	ELOBIXIBAT	inhibitor	ChemblInteractions
SLC10A2	SLC10A2	Definite	SLC10A2	THALIDOMIDE		PharmGKB
SLC10A2	SLC10A2	Definite	SLC10A2	DOCETAXEL		PharmGKB
SLC10A2	SLC10A2	Definite	SLC10A2	TAUROCHOLIC ACID		GuideToPharmacologyInteractions
SLC12A6	SLC12A6	Definite	SLC12A6	POTASSIUM CHLORIDE		DrugBank	16949074|16943364|17418819
SLC44A4	SLC44A4	Definite	SLC44A4	ASG-5ME	antibody	TTD
SLC6A19	SLC6A19	Definite	SLC6A19	BENZTROPINE	inhibitor	GuideToPharmacologyInteractions
TRPM4	TRPM4	Definite	TRPM4	cA2	activator	GuideToPharmacologyInteractions
TRPM4	TRPM4	Definite	TRPM4	SODIUM ORTHOVANAD	activator	GuideToPharmacologyInteractions
TRPM4	TRPM4	Definite	TRPM4	CHEMBL99951	activator	GuideToPharmacologyInteractions
TRPM4	TRPM4	Definite	TRPM4	ADENOSINE TRIPHOSPHATE	channel blocker|gating inhibitor	GuideToPharmacologyInteractions
TRPM4	TRPM4	Definite	TRPM4	SPERMINE	channel blocker	GuideToPharmacologyInteractions
TRPM4	TRPM4	Definite	TRPM4	ADENOSINE	channel blocker	GuideToPharmacologyInteractions
TRPM4	TRPM4	Definite	TRPM4	ADENOSINE DIPHOSPHATE	gating inhibitor	GuideToPharmacologyInteractions
TRPM4	TRPM4	Definite	TRPM4	CLOTRIMAZOLE	gating inhibitor	GuideToPharmacologyInteractions
RORC	RORC	Definite	RORC	CHEMBL169046	agonist	GuideToPharmacologyInteractions
RORC	RORC	Definite	RORC	CHEMBL89241	antagonist	GuideToPharmacologyInteractions
RORC	RORC	Definite	RORC	JTE-151	antagonist	ChemblInteractions
NR5A1	NR5A1	Definite	NR5A1	HEPARIN		NCI	6372156
NR5A1	NR5A1	Definite	NR5A1	LIOTHYRONINE SODIUM		NCI	11145595
NR5A1	NR5A1	Definite	NR5A1	OXYTOCIN		NCI	8108428
NR5A1	NR5A1	Definite	NR5A1	DECITABINE		NCI	17519303
NR5A1	NR5A1	Definite	NR5A1	HYDROCORTISONE		NCI	16002533
NR5A1	NR5A1	Definite	NR5A1	STAUROSPORINE		NCI	12917325
NR5A1	NR5A1	Definite	NR5A1	DEXAMETHASONE		NCI	16857744
NR5A1	NR5A1	Definite	NR5A1	CORTICOTROPIN		NCI	12239114|12530657
NR5A1	NR5A1	Definite	NR5A1	CHEMBL35482		NCI	17176485
RORA	RORA	Definite	RORA	CHEMBL497834	agonist	GuideToPharmacologyInteractions
RORA	RORA	Definite	RORA	CHOLESTEROL	agonist	GuideToPharmacologyInteractions|DrugBank	10592235|17139284|17016423
RORA	RORA	Definite	RORA	CHEMBL1231592	agonist	GuideToPharmacologyInteractions|DrugBank	10592235|17139284|17016423
RORA	RORA	Definite	RORA	MELATONIN		NCI	8702678|12595746
RORB	RORB	Definite	RORB	MELATONIN	agonist	DrugBank	7961794
RORB	RORB	Definite	RORB	TRETINOIN	agonist|antagonist	GuideToPharmacologyInteractions
RORB	RORB	Definite	RORB	CHEMBL104049	antagonist	GuideToPharmacologyInteractions
RORB	RORB	Definite	RORB	CHEMBL89241	antagonist	GuideToPharmacologyInteractions

## Sheet: TableS5.Drug-set enrichment
Function	Enrichment Score	P.value
REACTOME PLATELET SENSITIZATION BY LDL	0.27	0.00313
REACTOME IL 7 SIGNALING	-0.26	0.00476
REACTOME REGULATORY RNA PATHWAYS	-0.26	0.00486
REACTOME GLYCEROPHOSPHOLIPID BIOSYNTHESIS	0.25	0.00566
REACTOME PROCESSING OF CAPPED INTRON CONTAINING PRE MRNA	-0.25	0.007
REACTOME MRNA SPLICING	-0.25	0.0072
REACTOME VIRAL MESSENGER RNA SYNTHESIS	-0.24	0.011
REACTOME COMPLEMENT CASCADE	0.23	0.0147
REACTOME IRAK1 RECRUITS IKK COMPLEX	-0.23	0.0151
REACTOME NRIF SIGNALS CELL DEATH FROM THE NUCLEUS	0.23	0.0153
REACTOME REGULATED PROTEOLYSIS OF P75NTR	0.23	0.0154
REACTOME DOWNSTREAM SIGNALING OF ACTIVATED FGFR	-0.23	0.0154
REACTOME REGULATION OF THE FANCONI ANEMIA PATHWAY	-0.23	0.0167
REACTOME MRNA CAPPING	-0.23	0.0168
REACTOME VOLTAGE GATED POTASSIUM CHANNELS	-0.23	0.018
REACTOME MRNA SPLICING MINOR PATHWAY	-0.23	0.0181
REACTOME INSULIN RECEPTOR SIGNALLING CASCADE	-0.23	0.0184
REACTOME TRYPTOPHAN CATABOLISM	0.23	0.019
REACTOME MRNA PROCESSING	-0.23	0.0193
REACTOME ACTIVATED NOTCH1 TRANSMITS SIGNAL TO THE NUCLEUS	0.22	0.0204
REACTOME FANCONI ANEMIA PATHWAY	-0.22	0.0208
REACTOME KINESINS	-0.22	0.0215
REACTOME HORMONE LIGAND BINDING RECEPTORS	0.22	0.0232
REACTOME PI3K CASCADE	-0.22	0.0244
REACTOME SOS MEDIATED SIGNALLING	-0.22	0.0265
REACTOME NFKB AND MAP KINASES ACTIVATION MEDIATED BY TLR4 SIGNALING REPERTOIRE	0.22	0.0291
REACTOME PEPTIDE LIGAND BINDING RECEPTORS	-0.22	0.0302
REACTOME SYNTHESIS OF PE	0.21	0.0333
REACTOME SHC1 EVENTS IN ERBB4 SIGNALING	-0.21	0.0338
REACTOME SIGNALING BY INSULIN RECEPTOR	-0.21	0.0342
REACTOME MICRORNA MIRNA BIOGENESIS	-0.21	0.0362
REACTOME EFFECTS OF PIP2 HYDROLYSIS	0.21	0.0368
REACTOME P75NTR RECRUITS SIGNALLING COMPLEXES	0.21	0.0378
REACTOME ENERGY DEPENDENT REGULATION OF MTOR BY LKB1 AMPK	-0.21	0.0414
REACTOME ADHERENS JUNCTIONS INTERACTIONS	-0.2	0.0463
REACTOME SIGNALING BY FGFR MUTANTS	-0.2	0.0465
REACTOME MYOGENESIS	-0.2	0.0472
REACTOME SIGNALING BY EGFR IN CANCER	-0.2	0.0504
REACTOME CLEAVAGE OF GROWING TRANSCRIPT IN THE TERMINATION REGION	-0.2	0.0506
REACTOME ERKS ARE INACTIVATED	0.2	0.0514
REACTOME SYNTHESIS SECRETION AND INACTIVATION OF GLP1	0.2	0.0523
REACTOME CYCLIN A B1 ASSOCIATED EVENTS DURING G2 M TRANSITION	-0.2	0.0549
REACTOME PLATELET HOMEOSTASIS	0.2	0.0576
REACTOME INTERFERON SIGNALING	0.2	0.058
REACTOME SIGNALLING TO P38 VIA RIT AND RIN	-0.2	0.0622
REACTOME HYALURONAN UPTAKE AND DEGRADATION	0.19	0.0639
REACTOME GAMMA CARBOXYLATION TRANSPORT AND AMINO TERMINAL CLEAVAGE OF PROTEINS	-0.19	0.0659
REACTOME PRE NOTCH EXPRESSION AND PROCESSING	-0.19	0.0671
REACTOME REGULATION OF IFNG SIGNALING	0.19	0.0701
REACTOME NFKB IS ACTIVATED AND SIGNALS SURVIVAL	0.19	0.0725
REACTOME ACTIVATION OF GENES BY ATF4	0.19	0.0733
REACTOME INTERFERON ALPHA BETA SIGNALING	0.19	0.0754
REACTOME SIGNALING BY FGFR1 MUTANTS	-0.19	0.0761
REACTOME MYD88 MAL CASCADE INITIATED ON PLASMA MEMBRANE	0.19	0.0775
REACTOME OPIOID SIGNALLING	0.19	0.0776
REACTOME ANTIGEN PRESENTATION FOLDING ASSEMBLY AND PEPTIDE LOADING OF CLASS I MHC	0.19	0.078
REACTOME SEMA4D INDUCED CELL MIGRATION AND GROWTH CONE COLLAPSE	-0.19	0.08
REACTOME TRANSPORT OF MATURE TRANSCRIPT TO CYTOPLASM	-0.19	0.0803
REACTOME POST NMDA RECEPTOR ACTIVATION EVENTS	-0.19	0.0824
REACTOME PI3K AKT ACTIVATION	-0.19	0.0826
REACTOME METABOLISM OF PORPHYRINS	0.19	0.0829
REACTOME UNWINDING OF DNA	-0.19	0.0831
REACTOME CLASS C 3 METABOTROPIC GLUTAMATE PHEROMONE RECEPTORS	0.19	0.0841
REACTOME P75NTR SIGNALS VIA NFKB	0.18	0.0908
REACTOME G ALPHA S SIGNALLING EVENTS	0.18	0.0913
REACTOME FORMATION OF TUBULIN FOLDING INTERMEDIATES BY CCT TRIC	-0.18	0.0915
REACTOME SIGNALING BY NOTCH4	0.18	0.0924

## Sheet: TableS6.PheWAS
Gene.Name	atlas ID	PMID	Year	Domain	Trait	P-value	N
AAMP-Genome wide association study ATLAS.csv	3187	31427789	2019	Skeletal	Standing height	1.1636e-14	385748
AAMP-Genome wide association study ATLAS.csv	3903	27863252	2016	Immunological	Reticulocyte fraction of red cells (three-way meta)	3.5235e-13	170690
AAMP-Genome wide association study ATLAS.csv	3271	31427789	2019	Skeletal	Comparative height size at age 10	8.5899e-13	380167
AAMP-Genome wide association study ATLAS.csv	3902	27863252	2016	Immunological	Reticulocyte count (three-way meta)	1.6209e-12	170641
AAMP-Genome wide association study ATLAS.csv	3881	27863252	2016	Immunological	High light scatter percentage of red cells (three-way meta)	5.1881e-12	170763
AAMP-Genome wide association study ATLAS.csv	3882	27863252	2016	Immunological	High light scatter reticulocyte count (three-way meta)	1.1346e-11	170761
AAMP-Genome wide association study ATLAS.csv	3889	27863252	2016	Immunological	Monocyte count (three-way meta)	2.0152e-11	170721
AAMP-Genome wide association study ATLAS.csv	3865	27863252	2016	Immunological	Red cell distribution width (two-way meta)	2.2462e-10	131520
AAMP-Genome wide association study ATLAS.csv	3892	27863252	2016	Immunological	Myeloid white cell count (three-way meta)	4.0091e-10	169219
AAMP-Genome wide association study ATLAS.csv	3872	27863252	2016	Immunological	Sum basophil neutrophil count (three-way meta)	8.5549e-10	170143
AAMP-Genome wide association study ATLAS.csv	3895	27863252	2016	Immunological	Neutrophil count (three-way meta)	1.3788e-09	170702
AAMP-Genome wide association study ATLAS.csv	3901	27863252	2016	Immunological	Red cell distribution width (three-way meta)	1.6604e-09	171529
AAMP-Genome wide association study ATLAS.csv	3412	31427789	2019	Skeletal	Sitting height	1.8904e-09	385393
AAMP-Genome wide association study ATLAS.csv	3867	27863252	2016	Immunological	Reticulocyte fraction of red cells (two-way meta)	2.1122e-09	130404
AAMP-Genome wide association study ATLAS.csv	3470	31427789	2019	Metabolic	Impedance measures - Trunk fat-free mass	2.4586e-09	379507
AAMP-Genome wide association study ATLAS.csv	3471	31427789	2019	Metabolic	Impedance measures - Trunk predicted mass	2.6925e-09	379469
AAMP-Genome wide association study ATLAS.csv	3877	27863252	2016	Immunological	Granulocyte count (three-way meta)	4.4112e-09	169822
AAMP-Genome wide association study ATLAS.csv	3845	27863252	2016	Immunological	High light scatter percentage of red cells (two-way meta)	7.0085e-09	130538
AAMP-Genome wide association study ATLAS.csv	3893	27863252	2016	Immunological	Sum neutrophil eosinophil count (three-way meta)	7.5724e-09	170384
AAMP-Genome wide association study ATLAS.csv	3866	27863252	2016	Immunological	Reticulocyte count (two-way meta)	1.0227e-08	130388
AAMP-Genome wide association study ATLAS.csv	3846	27863252	2016	Immunological	High light scatter reticulocyte count (two-way meta)	1.605e-08	130517
AAMP-Genome wide association study ATLAS.csv	3856	27863252	2016	Immunological	Myeloid white cell count (two-way meta)	1.9532e-08	130268
AAMP-Genome wide association study ATLAS.csv	3836	27863252	2016	Immunological	Sum basophil neutrophil count (two-way meta)	2.3512e-08	131031
AAMP-Genome wide association study ATLAS.csv	3380	31427789	2019	Cardiovascular	Systolic Blood Pressure (automated reading)	2.4443e-08	361402
AAMP-Genome wide association study ATLAS.csv	3853	27863252	2016	Immunological	Monocyte count (two-way meta)	2.7412e-08	131544
AAMP-Genome wide association study ATLAS.csv	3904	27863252	2016	Immunological	White blood cell count (three-way meta)	3.8962e-08	172435
AAMP-Genome wide association study ATLAS.csv	3859	27863252	2016	Immunological	Neutrophil count (two-way meta)	4.3374e-08	131564
AAMP-Genome wide association study ATLAS.csv	3841	27863252	2016	Immunological	Granulocyte count (two-way meta)	1.3071e-07	130875
AAMP-Genome wide association study ATLAS.csv	67	26192919	2015	Gastrointestinal	Inflammatory Bowel Disease	1.4093e-07	34652
AAMP-Genome wide association study ATLAS.csv	2031	28067908	2017	Gastrointestinal	Inflammatory Bowel Disease	2.0057e-07	59957
AAMP-Genome wide association study ATLAS.csv	3857	27863252	2016	Immunological	Sum neutrophil eosinophil count (two-way meta)	2.3496e-07	131409
AAMP-Genome wide association study ATLAS.csv	4129	29403010	2018	Immunological	White blood cell count	2.6951e-07	107964
AAMP-Genome wide association study ATLAS.csv	3897	27863252	2016	Immunological	Plateletcrit (three-way meta)	3.2251e-07	164339
AAMP-Genome wide association study ATLAS.csv	3444	31427789	2019	Metabolic	Impedance measures - Whole body water mass	6.2699e-07	379835
AAMP-Genome wide association study ATLAS.csv	3443	31427789	2019	Metabolic	Impedance measures - Whole body fat-free mass	9.172e-07	379804
AAMP-Genome wide association study ATLAS.csv	3899	27863252	2016	Immunological	Platelet count (three-way meta)	1.1962e-06	166066
AAMP-Genome wide association study ATLAS.csv	3868	27863252	2016	Immunological	White blood cell count (two-way meta)	1.783e-06	131969
AAMP-Genome wide association study ATLAS.csv	69	26192919	2015	Gastrointestinal	Ulcerative Colitis	2.2981e-06	27432
AAMP-Genome wide association study ATLAS.csv	3861	27863252	2016	Immunological	Plateletcrit (two-way meta)	4.3728e-06	127033
AAMP-Genome wide association study ATLAS.csv	3885	27863252	2016	Immunological	Lymphocyte percentage of white cells (three-way meta)	4.7081e-06	171748
AAMP-Genome wide association study ATLAS.csv	4175	30048462	2018	Skeletal	Heel bone mineral density	4.8535e-06	394929
AAMP-Genome wide association study ATLAS.csv	3863	27863252	2016	Immunological	Platelet count (two-way meta)	6.2146e-06	127127
AAMP-Genome wide association study ATLAS.csv	3466	31427789	2019	Metabolic	Impedance measures - Arm fat-free mass (left)	1.078e-05	379653
AAMP-Genome wide association study ATLAS.csv	3463	31427789	2019	Metabolic	Impedance measures - Arm predicted mass (right)	1.193e-05	379716
AAMP-Genome wide association study ATLAS.csv	3467	31427789	2019	Metabolic	Impedance measures - Arm predicted mass (left)	1.2481e-05	379638
AAMP-Genome wide association study ATLAS.csv	3849	27863252	2016	Immunological	Lymphocyte percentage of white cells (two-way meta)	1.292e-05	132570
AAMP-Genome wide association study ATLAS.csv	3883	27863252	2016	Immunological	Immature fraction of reticulocytes (three-way meta)	1.4462e-05	170548
AAMP-Genome wide association study ATLAS.csv	3462	31427789	2019	Metabolic	Impedance measures - Arm fat-free mass (right)	1.5117e-05	379723
AAMP-Genome wide association study ATLAS.csv	3446	31427789	2019	Metabolic	Impedance measures - Basal metabolic rate	2.6231e-05	379821
AAMP-Genome wide association study ATLAS.csv	4113	29403010	2018	Metabolic	Potassium	4.232e-05	132938
AAMP-Genome wide association study ATLAS.csv	3325	31427789	2019	Reproduction	Relative age voice broke (male)	4.988e-05	164394
AAMP-Genome wide association study ATLAS.csv	2030	28067908	2017	Gastrointestinal	Ulcerative colitis	5.8949e-05	45975
AAMP-Genome wide association study ATLAS.csv	3608	31427789	2019	Metabolic	Non-cancer illness code, self-reported: high cholesterol	6.087e-05	289307
AAMP-Genome wide association study ATLAS.csv	4077	30239722	2018	Metabolic	Waist-hip ratio	8.945e-05	697734
AAMP-Genome wide association study ATLAS.csv	3736	31427789	2019	Psychiatric	Depression - Impact of normal roles during worst period of depression	9.3139e-05	71674
AAMP-Genome wide association study ATLAS.csv	4225	31015401	2019	Environmental	HMG CoA reductase inhibitors	0.00011519	290385
AAMP-Genome wide association study ATLAS.csv	3860	27863252	2016	Immunological	Neutrophil percentage of white cells (two-way meta)	0.00014149	132352
AAMP-Genome wide association study ATLAS.csv	4378	30940143	2019	Cardiovascular	High blood pressure	0.00016792	458554
AAMP-Genome wide association study ATLAS.csv	4122	29403010	2018	Metabolic	Gamma-glutamyl transferase	0.00017057	118309
AAMP-Genome wide association study ATLAS.csv	3896	27863252	2016	Immunological	Neutrophil percentage of white cells (three-way meta)	0.00019555	171542
AAMP-Genome wide association study ATLAS.csv	3626	31427789	2019	Activities	Treatment/medication code: bendroflumethiazide	0.00022045	280443
AAMP-Genome wide association study ATLAS.csv	3613	31427789	2019	Activities	Treatment/medication code: simvastatin	0.00022824	280443
AAMP-Genome wide association study ATLAS.csv	4302	30664634	2019	Metabolic	Arms-arm fat ratio (female)	0.0002597	195068
AAMP-Genome wide association study ATLAS.csv	3862	27863252	2016	Immunological	Platelet distribution width (two-way meta)	0.00027065	127171
AAMP-Genome wide association study ATLAS.csv	4328	30598549	2018	Skeletal	Estimated bone mineral density from heel ultrasounds	0.00031029	426824
AAMP-Genome wide association study ATLAS.csv	3257	31427789	2019	Nutritional	Hot drink temperature	0.00036511	382329
AAMP-Genome wide association study ATLAS.csv	3551	31427789	2019	Cardiovascular	Vascular/heart problems diagnosed by doctor: High blood pressure	0.00038222	385699
AAMP-Genome wide association study ATLAS.csv	4130	29403010	2018	Immunological	Neutrophil count	0.00048191	62076
AAMP-Genome wide association study ATLAS.csv	4176	30718926	2019	Endocrine	Type 2 Diabetes	0.00049525	191764
AAMP-Genome wide association study ATLAS.csv	2034	27992413	2017	Gastrointestinal	Primary sclerosing cholangitis	0.00057053	14890
AAMP-Genome wide association study ATLAS.csv	3507	31427789	2019	Nutritional	Non-butter spread type details: Polyunsaturated/sunflower oil based spread (eg: Flora)	0.00060298	201144
AAMP-Genome wide association study ATLAS.csv	3251	31427789	2019	Nutritional	Cheese intake	0.00060445	377082
AAMP-Genome wide association study ATLAS.csv	3256	31427789	2019	Nutritional	Coffee intake	0.00069998	358093
AAMP-Genome wide association study ATLAS.csv	3455	31427789	2019	Metabolic	Impedance measures - Leg predicted mass (right)	0.00071683	379793
AAMP-Genome wide association study ATLAS.csv	2029	28067908	2017	Gastrointestinal	Crohn's Disease	0.00072572	40266
AAMP-Genome wide association study ATLAS.csv	3454	31427789	2019	Metabolic	Impedance measures - Leg fat-free mass (right)	0.0007417	379793
AAMP-Genome wide association study ATLAS.csv	3464	31427789	2019	Metabolic	Impedance measures - Arm fat percentage (left)	0.00075766	379699
AAMP-Genome wide association study ATLAS.csv	3379	31427789	2019	Cardiovascular	Diastolic Blood Pressure (automated reading)	0.00083005	361411
AAMP-Genome wide association study ATLAS.csv	3198	31427789	2019	Environment	Frequency of travelling from home to job workplace	0.00086553	216647
AAMP-Genome wide association study ATLAS.csv	3452	31427789	2019	Metabolic	Impedance measures - Leg fat percentage (right)	0.00093477	379806
AAMP-Genome wide association study ATLAS.csv	3898	27863252	2016	Immunological	Platelet distribution width (three-way meta)	0.0011065	164433
AAMP-Genome wide association study ATLAS.csv	3460	31427789	2019	Metabolic	Impedance measures - Arm fat percentage (right)	0.0011098	379752
AAMP-Genome wide association study ATLAS.csv	4215	31015462	2019	Metabolic	Estimated glomerular filtration rate	0.001162	350504
AAMP-Genome wide association study ATLAS.csv	4224	31015401	2019	Environmental	Agents acting on the renin-angiotensin system	0.0011954	237530
AAMP-Genome wide association study ATLAS.csv	3274	31427789	2019	Dermatological	Ease of skin tanning	0.001389	378364
AAMP-Genome wide association study ATLAS.csv	3441	31427789	2019	Metabolic	Impedance measures - Body fat percentage	0.0015663	379615
AAMP-Genome wide association study ATLAS.csv	4097	29471430	2018	Neoplasms	Colorectal cancer	0.0015893	33870
AAMP-Genome wide association study ATLAS.csv	3840	27863252	2016	Immunological	Eosinophil percentage of granulocytes (two-way meta)	0.0015932	131525
AAMP-Genome wide association study ATLAS.csv	4079	30239722	2018	Metabolic	Waist-hip ratio (female)	0.0016469	381152
AAMP-Genome wide association study ATLAS.csv	4080	30239722	2018	Metabolic	Waist-hip ratio (adjusted for BMI)	0.001693	694649
AAMP-Genome wide association study ATLAS.csv	4121	29403010	2018	Metabolic	Alkaline phosphatase	0.0017054	105030
AAMP-Genome wide association study ATLAS.csv	3890	27863252	2016	Immunological	Monocyte percentage of white cells (three-way meta)	0.0018001	170494
AAMP-Genome wide association study ATLAS.csv	4214	31049640	2019	Endocrine	Type 2 Diabetes	0.0018606	4347
AAMP-Genome wide association study ATLAS.csv	68	26192919	2015	Gastrointestinal	Crohn's Disease	0.0019362	20883
AAMP-Genome wide association study ATLAS.csv	3545	31427789	2019	Body Structures	Mouth/teeth dental problems: Painful gums	0.0021744	385026
AAMP-Genome wide association study ATLAS.csv	4135	29403010	2018	Immunological	Red blood cell count	0.0024044	108794
AAMP-Genome wide association study ATLAS.csv	3847	27863252	2016	Immunological	Immature fraction of reticulocytes (two-way meta)	0.0024177	130321
AAMP-Genome wide association study ATLAS.csv	3858	27863252	2016	Immunological	Neutrophil percentage of granulocytes (two-way meta)	0.0024602	131660
AAMP-Genome wide association study ATLAS.csv	3255	31427789	2019	Nutritional	Tea intake	0.002618	373481
AAMP-Genome wide association study ATLAS.csv	3675	31427789	2019	Gastrointestinal	Diagnoses - main ICD10: K80 Cholelithiasis	0.0028354	300791
AAMP-Genome wide association study ATLAS.csv	4193	31217584	2019	Cardiovascular	PR interval	0.0028465	17422
AAMP-Genome wide association study ATLAS.csv	3197	31427789	2019	Environment	Length of working week for main job	0.0028602	217750
AAMP-Genome wide association study ATLAS.csv	3597	31427789	2019	Cardiovascular	Non-cancer illness code, self-reported: hypertension	0.0032554	289307
AAMP-Genome wide association study ATLAS.csv	4567	31676860	2019	Neurological	Left precentral	0.0035136	21821
AAMP-Genome wide association study ATLAS.csv	4076	30239722	2018	Metabolic	Body Mass Index (female)	0.0037147	434794
AAMP-Genome wide association study ATLAS.csv	3468	31427789	2019	Metabolic	Impedance measures - Trunk fat percentage	0.0038144	379600
AAMP-Genome wide association study ATLAS.csv	2037	27723758	2016	Immunological	Immunoglobulin A deficiency	0.0039311	6487
AAMP-Genome wide association study ATLAS.csv	3458	31427789	2019	Metabolic	Impedance measures - Leg fat-free mass (left)	0.0039577	379766
AAMP-Genome wide association study ATLAS.csv	3241	31427789	2019	Nutritional	Salad / raw vegetable intake	0.0040225	363780
AAMP-Genome wide association study ATLAS.csv	4221	31015401	2019	Environmental	Diuretics	0.0041748	229086
AAMP-Genome wide association study ATLAS.csv	3459	31427789	2019	Metabolic	Impedance measures - Leg predicted mass (left)	0.0042364	379761
AAMP-Genome wide association study ATLAS.csv	4199	31217584	2019	Metabolic	Waist-hip ratio (female)	0.0044001	9066
AAMP-Genome wide association study ATLAS.csv	4230	31015401	2019	Environmental	Opioids	0.0044933	78808
AAMP-Genome wide association study ATLAS.csv	3456	31427789	2019	Metabolic	Impedance measures - Leg fat percentage (left)	0.0046946	379786
AAMP-Genome wide association study ATLAS.csv	4571	31676860	2019	Neurological	Left superior frontal	0.0047704	21821
AAMP-Genome wide association study ATLAS.csv	3876	27863252	2016	Immunological	Eosinophil percentage of granulocytes (three-way meta)	0.0051657	170536
AAMP-Genome wide association study ATLAS.csv	4050	28358823	2017	Body Structures	Anterior cruciate ligament rupture (fixed effect model)	0.00519	99342
AAMP-Genome wide association study ATLAS.csv	3692	31427789	2019	Cardiovascular	Diagnoses - secondary ICD10: I20 Angina pectoris	0.0054784	244890
AAMP-Genome wide association study ATLAS.csv	212	28604731	2017	Neurological	Insomnia (female)	0.0056074	59367
AAMP-Genome wide association study ATLAS.csv	3435	31427789	2019	Metabolic	Body Mass Index	0.0057856	385336
AAMP-Genome wide association study ATLAS.csv	3499	31427789	2019	Dermatological	Hair colour (natural, before greying): Black	0.0061826	385603
AAMP-Genome wide association study ATLAS.csv	3490	31427789	2019	Nutritional	Cereal type: Oat cereal (e.g. Ready Brek, porridge)	0.0062011	319477
AAMP-Genome wide association study ATLAS.csv	3590	31427789	2019	Activities	Medication for cholesterol, blood pressure or diabetes: Cholesterol lowering medication	0.0065073	176050
AAMP-Genome wide association study ATLAS.csv	4466	31676860	2019	Neurological	Left precentral	0.0073097	19629
AAMP-Genome wide association study ATLAS.csv	4197	31217584	2019	Metabolic	Waist-hip ratio	0.0073944	33904
AAMP-Genome wide association study ATLAS.csv	3310	31427789	2019	Activities	Age started wearing glasses or contact lenses	0.0076545	332074
AAMP-Genome wide association study ATLAS.csv	4334	30552067	2018	Respiratory	Asthma	0.0077113	30810
AAMP-Genome wide association study ATLAS.csv	3674	31427789	2019	Gastrointestinal	Diagnoses - main ICD10: K62 Other diseases of anus and rectum	0.0082469	300791
AAMP-Genome wide association study ATLAS.csv	3240	31427789	2019	Nutritional	Cooked vegetable intake	0.0085767	374858
AAMP-Genome wide association study ATLAS.csv	3894	27863252	2016	Immunological	Neutrophil percentage of granulocytes (three-way meta)	0.0090076	170672
AAMP-Genome wide association study ATLAS.csv	3436	31427789	2019	Metabolic	Weight	0.0094443	385473
AAMP-Genome wide association study ATLAS.csv	3610	31427789	2019	Activities	Treatment/medication code: multivitamins	0.0096871	280443
AAMP-Genome wide association study ATLAS.csv	4237	31015401	2019	Environmental	Antihistamines for systemic use	0.0098801	151636
AAMP-Genome wide association study ATLAS.csv	4315	30643251	2019	Psychiatric	Cigarettes per day	0.0099026	263954
AAMP-Genome wide association study ATLAS.csv	4470	31676860	2019	Neurological	Left superior frontal	0.0099163	19629
AAMP-Genome wide association study ATLAS.csv	3238	31427789	2019	Psychiatric	Exposure to tobacco smoke at home	0.010549	349624
AAMP-Genome wide association study ATLAS.csv	3694	31427789	2019	Cardiovascular	Diagnoses - secondary ICD10: I48 Atrial fibrillation and flutter	0.010748	244890
AAMP-Genome wide association study ATLAS.csv	4321	30643256	2019	Psychiatric	Neuroticism (univariate)	0.010874	523783
AAMP-Genome wide association study ATLAS.csv	3319	31427789	2019	Respiratory	Wheeze or whistling in the chest in last year	0.011155	379150
AAMP-Genome wide association study ATLAS.csv	4149	29403010	2018	Cardiovascular	Left ventricular internal dimension in systole	0.011169	19586
AAMP-Genome wide association study ATLAS.csv	3691	31427789	2019	Cardiovascular	Diagnoses - secondary ICD10: I10 Essential (primary) hypertension	0.011253	244890
AAMP-Genome wide association study ATLAS.csv	4112	29403010	2018	Metabolic	Sodium	0.01182	127304
AAMP-Genome wide association study ATLAS.csv	4200	31217584	2019	Skeletal	Height	0.012226	49796
AAMP-Genome wide association study ATLAS.csv	4704	BioRxiv: https://doi.org/10.1101/288612	2019	Neurological	Posterior limb of internal capsule mean diusivities	0.012404	17706
AAMP-Genome wide association study ATLAS.csv	1074	19729612	2009	Immunological	Serum levels of soluble E-selectin with T1D	0.012797	685
AAMP-Genome wide association study ATLAS.csv	3747	31427789	2019	Psychiatric	Happiness and subjective well-being - Belief that own life is meaningfull	0.013137	123818
AAMP-Genome wide association study ATLAS.csv	4131	29403010	2018	Immunological	Eosinophil count	0.013338	62076
AAMP-Genome wide association study ATLAS.csv	3445	31427789	2019	Metabolic	Impedance measures - Body Mass Index (BMI)	0.013593	379831
AAMP-Genome wide association study ATLAS.csv	4600	31676860	2019	Neurological	Right rostral anterior cingulate	0.013673	21821
AAMP-Genome wide association study ATLAS.csv	3360	31427789	2019	Environment	Hearing aid user	0.013897	235220
AAMP-Genome wide association study ATLAS.csv	4331	30595539	2018	Dermatological	Postburn scar height	0.014214	665
AAMP-Genome wide association study ATLAS.csv	3554	31427789	2019	Activities	Medication for cholesterol, blood pressure, diabetes, or take exogenous hormones: Cholesterol lowering medication	0.014307	207533
AAMP-Genome wide association study ATLAS.csv	3688	31427789	2019	Metabolic	Diagnoses - secondary ICD10: E78 Disorders of lipoprotein metabolism and other lipidemias	0.014605	244890
AAMP-Genome wide association study ATLAS.csv	4098	29403010	2018	Metabolic	Total cholesterol	0.015012	128305
AAMP-Genome wide association study ATLAS.csv	3887	27863252	2016	Immunological	Mean corpuscular hemoglobin (three-way meta)	0.015055	172332
AAMP-Genome wide association study ATLAS.csv	3596	31427789	2019	Activities	Mineral and other dietary supplements: Iron	0.01528	385261
AAMP-Genome wide association study ATLAS.csv	3332	31427789	2019	Activities	Taking other prescription medications	0.015345	385236
AAMP-Genome wide association study ATLAS.csv	4074	30239722	2018	Metabolic	Body Mass Index	0.015364	806834
AAMP-Genome wide association study ATLAS.csv	3628	31427789	2019	Environment	Illnesses of father: Heart disease	0.015689	355137
AAMP-Genome wide association study ATLAS.csv	3553	31427789	2019	Respiratory	Blood clot, DVT, bronchitis, emphysema, asthma, rhinitis, eczema, allergy diagnosed by doctor: Hayfever, allergic rhinitis or eczema	0.015903	385822
AAMP-Genome wide association study ATLAS.csv	210	28604731	2017	Neurological	Insomnia	0.015976	113006
AAMP-Genome wide association study ATLAS.csv	4137	29403010	2018	Immunological	Hematocrit	0.016002	108757
AAMP-Genome wide association study ATLAS.csv	15	28439101	2017	Psychiatric	Posttraumatic stress disorder	0.016211	9223
AAMP-Genome wide association study ATLAS.csv	3839	27863252	2016	Immunological	Eosinophil percentage of white cells (two-way meta)	0.016503	132052
AAMP-Genome wide association study ATLAS.csv	4296	30677029	2019	Metabolic	Thinness	0.016789	7931
AAMP-Genome wide association study ATLAS.csv	4153	29403010	2018	Cardiovascular	Fractional shortening	0.017515	19580
AAMP-Genome wide association study ATLAS.csv	3282	31427789	2019	Social Interactions	Number of full brothers	0.017707	380062
AAMP-Genome wide association study ATLAS.csv	3324	31427789	2019	Reproduction	Relative age of first facial hair (male)	0.017804	171805
AAMP-Genome wide association study ATLAS.csv	3440	31427789	2019	Metabolic	Impedance measures - Weight	0.017916	379840
AAMP-Genome wide association study ATLAS.csv	3259	31427789	2019	Nutritional	Major dietary changes in the last 5 years	0.01822	385587
AAMP-Genome wide association study ATLAS.csv	3759	31427789	2019	Psychiatric	Anxiety - Reccent feelings or nervousness or anxiety	0.018951	126325
AAMP-Genome wide association study ATLAS.csv	874	27005778	2016	Metabolic	Glycine	0.019462	18734
AAMP-Genome wide association study ATLAS.csv	3634	31427789	2019	Environment	Illnesses of father: Diabetes	0.020757	355137
AAMP-Genome wide association study ATLAS.csv	3886	27863252	2016	Immunological	Mean corpuscular hemoglobin concentration (three-way meta)	0.020821	172851
AAMP-Genome wide association study ATLAS.csv	4285	30804560	2019	Respiratory	PEF	0.021866	321047
AAMP-Genome wide association study ATLAS.csv	3548	31427789	2019	Body Structures	Mouth/teeth dental problems: Toothache	0.022084	385026
AAMP-Genome wide association study ATLAS.csv	985	27989323	2017	Immunological	Interleukin-17	0.022198	7760
AAMP-Genome wide association study ATLAS.csv	3869	27863252	2016	Immunological	Basophil count (three-way meta)	0.022448	171846
AAMP-Genome wide association study ATLAS.csv	4269	30867560	2019	Psychiatric	Neuroticism general factor	0.022557	270059
AAMP-Genome wide association study ATLAS.csv	3323	31427789	2019	Activities	Ever had prostate specific antigen (PSA) test	0.022956	168371
AAMP-Genome wide association study ATLAS.csv	3587	31427789	2019	Activities	Types of physical activity in last 4 weeks: Strenuous sports	0.023008	384450
AAMP-Genome wide association study ATLAS.csv	3627	31427789	2019	Activities	Treatment/medication code: paracetamol	0.023221	280443
AAMP-Genome wide association study ATLAS.csv	3494	31427789	2019	Nutritional	Coffee type: Ground coffee (include espresso, filter etc)	0.023225	303811
AAMP-Genome wide association study ATLAS.csv	4136	29403010	2018	Hematological	Hemoglobin	0.023778	108769
AAMP-Genome wide association study ATLAS.csv	1199	25087078	2014	Neurological	Epilepsy	0.023906	34853
AAMP-Genome wide association study ATLAS.csv	3875	27863252	2016	Immunological	Eosinophil percentage of white cells (three-way meta)	0.024047	172378
AAMP-Genome wide association study ATLAS.csv	3701	31427789	2019	Connective Tissue	Diagnoses - secondary ICD10: M19 Other and unspecified osteoarthritis	0.024048	244890
AAMP-Genome wide association study ATLAS.csv	3185	31427789	2019	Metabolic	Waist circumference	0.024142	385932
AAMP-Genome wide association study ATLAS.csv	4580	31676860	2019	Neurological	Right entorhinal	0.024553	21821
AAMP-Genome wide association study ATLAS.csv	4327	30643256	2019	Psychiatric	Well-being spectrum	0.02552	2311184
AAMP-Genome wide association study ATLAS.csv	3417	31427789	2019	Psychiatric	Neuroticism score	0.025604	312740
AAMP-Genome wide association study ATLAS.csv	4082	30239722	2018	Metabolic	Waist-hip ratio (adjusted for BMI, female)	0.026214	379501
AAMP-Genome wide association study ATLAS.csv	4231	31015401	2019	Environmental	Salicylic acid and derivatives	0.026645	112010
AAMP-Genome wide association study ATLAS.csv	4594	31676860	2019	Neurological	Right pars triangularis	0.027155	21821
AAMP-Genome wide association study ATLAS.csv	3286	31427789	2019	Psychiatric	Irritability	0.027206	369232
AAMP-Genome wide association study ATLAS.csv	4479	31676860	2019	Neurological	Right entorhinal	0.027897	19629
AAMP-Genome wide association study ATLAS.csv	3239	31427789	2019	Psychiatric	Exposure to tobacco smoke outside home	0.029377	327794
AAMP-Genome wide association study ATLAS.csv	3190	31427789	2019	Mortality	Number of self-reported non-cancer illnesses	0.029759	386581
AAMP-Genome wide association study ATLAS.csv	4499	31676860	2019	Neurological	Right rostral anterior cingulate	0.030037	19629
AAMP-Genome wide association study ATLAS.csv	3306	31427789	2019	Reproduction	Ever had same-sex intercourse	0.031426	349459
AAMP-Genome wide association study ATLAS.csv	3509	31427789	2019	Psychiatric	Reason for reducing amount of alcohol drunk: Illness or ill health	0.031523	142645
AAMP-Genome wide association study ATLAS.csv	3264	31427789	2019	Psychiatric	Average weekly beer plus cider intake	0.031729	274556
AAMP-Genome wide association study ATLAS.csv	4132	29403010	2018	Immunological	Basophil count	0.03179	62076
AAMP-Genome wide association study ATLAS.csv	4357	30220432	2018	Metabolic	Albuminuria	0.034182	382500
AAMP-Genome wide association study ATLAS.csv	4045	30054458	2018	Endocrine	Type 2 Diabetes	0.034484	659256
AAMP-Genome wide association study ATLAS.csv	3577	31427789	2019	Social Interactions	Social support - Leisure/social activities: Pub or social club	0.035166	385280
AAMP-Genome wide association study ATLAS.csv	3186	31427789	2019	Metabolic	Hip circumference	0.035188	385887
AAMP-Genome wide association study ATLAS.csv	3502	31427789	2019	Dermatological	Male-specific factors - Hair/balding pattern: Pattern 3	0.03527	176380
AAMP-Genome wide association study ATLAS.csv	3917	24105470	2014	Metabolic	Adiponectin	0.03559	7825
AAMP-Genome wide association study ATLAS.csv	4352	30573740	2018	Dermatological	Male pattern baldness (BOLT LMM non-infinitesimal mixed model)	0.03623	205327
AAMP-Genome wide association study ATLAS.csv	4388	30898391	2019	Neoplasms	Epithelial ovarian cancer (Endometrioid)	0.037048	4487
AAMP-Genome wide association study ATLAS.csv	3979	28869591	2017	Skeletal	Estimated BMD	0.037295	142487
AAMP-Genome wide association study ATLAS.csv	42	27864402	2016	Activities	Self-rated health	0.03761	111749
AAMP-Genome wide association study ATLAS.csv	3291	31427789	2019	Psychiatric	Tense / 'highly strung'	0.038635	374129
AAMP-Genome wide association study ATLAS.csv	4690	BioRxiv: https://doi.org/10.1101/288598	2019	Neurological	Uncinate fasciculus axial diusivities	0.038829	17706
AAMP-Genome wide association study ATLAS.csv	4106	29403010	2018	Metabolic	Non-albumin protein	0.039152	98538
AAMP-Genome wide association study ATLAS.csv	3851	27863252	2016	Immunological	Mean corpuscular hemoglobin (two-way meta)	0.039777	132224
AAMP-Genome wide association study ATLAS.csv	1009	27989323	2017	Immunological	Stromal cell-derived factor-1 alpha (CXCL12)	0.039801	5998
AAMP-Genome wide association study ATLAS.csv	4431	30053915	2018	Cell	Toxoplasmosis IgG levels	0.040118	559
AAMP-Genome wide association study ATLAS.csv	3831	27455348	2016	Neurological	Amyotrophic lateral sclerosis (linear mixed model)	0.040603	36052
AAMP-Genome wide association study ATLAS.csv	4218	31015401	2019	Environmental	Antithrombotic agents	0.041598	153639
AAMP-Genome wide association study ATLAS.csv	4206	31152163	2019	Metabolic	Estimated glomerular filtration rate	0.041748	567460
AAMP-Genome wide association study ATLAS.csv	4205	31152163	2019	Metabolic	Estimated glomerular filtration rate	0.041888	765348
AAMP-Genome wide association study ATLAS.csv	1201	25087078	2014	Neurological	Focal epilepsy	0.042157	31467
AAMP-Genome wide association study ATLAS.csv	3657	31427789	2019	Psychiatric	Alcohol - Alcohol drinker status: Previous vs Current	0.042233	373560
AAMP-Genome wide association study ATLAS.csv	3708	31427789	2019	Mortality	Diagnoses - secondary ICD10: Z80 Family history of primary malignant neoplasm	0.042249	244890
AAMP-Genome wide association study ATLAS.csv	3838	27863252	2016	Immunological	Eosinophil count (two-way meta)	0.042719	131999
AAMP-Genome wide association study ATLAS.csv	3469	31427789	2019	Metabolic	Impedance measures - Trunk fat mass	0.042952	379578
AAMP-Genome wide association study ATLAS.csv	3925	28714975	2017	Cardiovascular	Coronary artery disease (SOFT definition including angina)	0.043447	148815
AAMP-Genome wide association study ATLAS.csv	4686	BioRxiv: https://doi.org/10.1101/288594	2019	Neurological	Superior corona radiata axial diusivities	0.04506	17706
AAMP-Genome wide association study ATLAS.csv	3589	31427789	2019	Activities	Types of physical activity in last 4 weeks: Heavy DIY (eg: weeding, lawn mowing, carpentry, digging)	0.045309	384450
AAMP-Genome wide association study ATLAS.csv	4145	29403010	2018	Cardiovascular	Pulse pressure	0.045451	136249
AAMP-Genome wide association study ATLAS.csv	3581	31427789	2019	Activities	Types of transport used (excluding work): Car/motor vehicle	0.045908	384551
AAMP-Genome wide association study ATLAS.csv	4081	30239722	2018	Metabolic	Waist-hip ratio (adjusted for BMI, male)	0.045984	315284
AAMP-Genome wide association study ATLAS.csv	4306	30664634	2019	Metabolic	Trunk-trunk fat ratio (female)	0.04613	195068
AAMP-Genome wide association study ATLAS.csv	4361	30061737	2018	Cardiovascular	Atrial fibrillation	0.046476	1030836
AAMP-Genome wide association study ATLAS.csv	2036	28039263	2017	Ear, Nose, Throat	Cisplatin-associated ototoxicity	0.046948	511
AAMP-Genome wide association study ATLAS.csv	4291	30787307	2019	Respiratory	Asthma	0.047164	14654
AAMP-Genome wide association study ATLAS.csv	4445	31676860	2019	Neurological	Left caudal anterior cingulate	0.04735	19629
AAMP-Genome wide association study ATLAS.csv	4744	BioRxiv: https://doi.org/10.1101/288652	2019	Neurological	Fornix (cres) / Stria terminalis radial diusivities	0.047437	17706
AAMP-Genome wide association study ATLAS.csv	4493	31676860	2019	Neurological	Right pars triangularis	0.048217	19629
AAMP-Genome wide association study ATLAS.csv	4617	31676860	2019	Neurological	Optic chiasm	0.048364	21821
AAMP-Genome wide association study ATLAS.csv	864	27005778	2016	Metabolic	22:6, docosahexaenoic acid (DHA)	0.048822	13499
AAMP-Genome wide association study ATLAS.csv	4329	30598549	2018	Body Structures	Fractures	0.048982	426795
AAMP-Genome wide association study ATLAS.csv	22	25187353	2014	Immunological	Clozapine-Induced Agranulocytosis/Granulocytopenia	0.049327	1359
ACE2-Genome wide association study ATLAS.csv	11	25056061	2014	Psychiatric	Schizophrenia	0.0079727	82315
ACE2-Genome wide association study ATLAS.csv	13	24280982	2014	Psychiatric	Schizophrenia vs Bipolar disorder	0.0079727	16381
ACE2-Genome wide association study ATLAS.csv	1019	17903296	2007	Skeletal	Lumbar Spine BMD (GEE, adjusted for multivariable)	0.038962	1117
ACE2-Genome wide association study ATLAS.csv	1107	22556244	2012	Dermatological	Blond hair in Solomon Islanders	0.046277	85
ACE2-Genome wide association study ATLAS.csv	1209	26635072	2015	Respiratory	FVC	0.047447	38199
ACE2-Genome wide association study ATLAS.csv	1230	17903308	2007	Psychiatric	Usual weekday bedtime (FBAT)	0.030258	738
ACE2-Genome wide association study ATLAS.csv	1234	17903308	2007	Psychiatric	Usual weekday sleep duration (FBAT)	0.029311	736
ACE2-Genome wide association study ATLAS.csv	1239	17903307	2007	Respiratory	Rate of decline FEF25-75 (GEE, adjusted for multiple covariates)	0.036488	1059
ACE2-Genome wide association study ATLAS.csv	1322	17903298	2007	Metabolic	Fasting plasma glucose (at exam 5, FBAT, adjusted for age, sex and BMI)	0.032267	1027
ACE2-Genome wide association study ATLAS.csv	1397	17903299	2007	Metabolic	High-density lipoprotein 2 cholesterol (at exam 5, GEE, adjusted for multivariable)	0.031767	958
ACE2-Genome wide association study ATLAS.csv	1420	17903299	2007	Metabolic	Intermediate high-density lipoprotein by NMR (at exam 4, FBAT, adjusted for multivariable)	0.002091	851
ACE2-Genome wide association study ATLAS.csv	1422	17903299	2007	Metabolic	Intermediate high-density lipoprotein by NMR (at exam 4, FBAT, adjusted for age and sex)	0.00959	851
ACE2-Genome wide association study ATLAS.csv	1424	17903299	2007	Metabolic	Large high-density lipoprotein by NMR (at exam 4, FBAT, adjusted for multivariable)	0.021651	851
ACE2-Genome wide association study ATLAS.csv	1432	17903299	2007	Metabolic	High-density lipoprotein particle size by NMR (at exam 4, FBAT, adjusted for multivariable)	0.00549	851
ACE2-Genome wide association study ATLAS.csv	1485	17903299	2007	Metabolic	Mean triglycerides from exam 1-7 (GEE, adjusted for multivariable)	0.01701	1087
ACE2-Genome wide association study ATLAS.csv	1493	17903299	2007	Metabolic	Remnant lipoprotein triglycerides (at exam 4, GEE, adjusted for age and sex)	0.042163	715
ACE2-Genome wide association study ATLAS.csv	1494	17903299	2007	Metabolic	Remnant lipoprotein triglycerides (at exam 4, FBAT)	0.035189	715
ACE2-Genome wide association study ATLAS.csv	1495	17903299	2007	Metabolic	Remnant lipoprotein triglycerides (at exam 4, GEE)	0.015377	715
ACE2-Genome wide association study ATLAS.csv	1497	17903299	2007	Metabolic	Triglycerides (at exam 1, GEE, adjusted for multivariable)	0.02324	1068
ACE2-Genome wide association study ATLAS.csv	1499	17903299	2007	Metabolic	Triglycerides (at exam 1, GEE, adjusted for age and sex)	0.033986	1068
ACE2-Genome wide association study ATLAS.csv	1501	17903299	2007	Metabolic	Triglycerides (at exam 2, GEE, adjusted for age and sex)	0.0061657	1068
ACE2-Genome wide association study ATLAS.csv	1513	17903299	2007	Metabolic	Triglyceride / High-density lipoprotein cholesterol ratio (at exam 1, GEE, adjusted for multivariable)	0.018008	1060
ACE2-Genome wide association study ATLAS.csv	1515	17903299	2007	Metabolic	Triglyceride / High-density lipoprotein cholesterol ratio (at exam 2, GEE, adjusted for age and sex)	0.0086546	1060
ACE2-Genome wide association study ATLAS.csv	1517	17903299	2007	Metabolic	Triglyceride / High-density lipoprotein cholesterol ratio (at exam 3, GEE, adjusted for age and sex)	0.04834	1060
ACE2-Genome wide association study ATLAS.csv	1526	17903299	2007	Metabolic	Remnant lipoprotein cholesterol (at exam 4, FBAT, adjusted for age and sex)	0.028878	746
ACE2-Genome wide association study ATLAS.csv	1527	17903299	2007	Metabolic	Remnant lipoprotein cholesterol (at exam 4, GEE, adjusted for age and sex)	0.011551	746
ACE2-Genome wide association study ATLAS.csv	1529	17903299	2007	Metabolic	Remnant lipoprotein cholesterol (at exam 4, GEE)	0.02335	746
ACE2-Genome wide association study ATLAS.csv	1562	17903303	2007	Cardiovascular	Mean internal carotid artery IMT (at exam 6, FBAT, adjusted for age and sex)	0.020385	888
ACE2-Genome wide association study ATLAS.csv	1564	17903303	2007	Cardiovascular	Mean internal carotid artery IMT (at exam 6, FBAT, adjusted for multivariable)	0.02092	880
ACE2-Genome wide association study ATLAS.csv	1586	17903294	2007	Hematological	Factor VII (at exam 5, FBAT, adjusted for age and sex)	0.037967	886
ACE2-Genome wide association study ATLAS.csv	1588	17903294	2007	Hematological	Factor VII (at exam 5, FBAT, adjusted for multivariable)	0.035155	886
ACE2-Genome wide association study ATLAS.csv	1590	17903294	2007	Hematological	Platelet aggregation to ADP (at exam 5, FBAT, adjusted for age and sex)	0.02667	724
ACE2-Genome wide association study ATLAS.csv	1665	17903293	2007	Metabolic	Alanine transaminase (at exam 2, GEE, adjusted for multivariable)	0.042175	904
ACE2-Genome wide association study ATLAS.csv	1694	17903293	2007	Metabolic	Vitamin K percentage of undercarboxylated osteocalcin (at exam 6 or 7, FBAT, adjusted for age and sex)	0.006888	504
ACE2-Genome wide association study ATLAS.csv	1696	17903293	2007	Metabolic	Vitamin K percentage of undercarboxylated osteocalcin (at exam 6 or 7, FBAT, adjusted for multivariable)	0.007318	504
ACE2-Genome wide association study ATLAS.csv	1829	17903296	2007	Skeletal	Spine Neck BMD (GEE, male, adjusted for multivariable)	0.012421	486
ACE2-Genome wide association study ATLAS.csv	1868	17903296	2007	Skeletal	Neck-Shaft Angle (FBAT, male, adjussted for multivariable)	0.007158	474
ACE2-Genome wide association study ATLAS.csv	1869	17903296	2007	Skeletal	Neck-Shaft Angle (GEE, male, adjussted for multivariable)	0.0036735	474
ACE2-Genome wide association study ATLAS.csv	1881	17903296	2007	Skeletal	Shaft cross-sectional moment of inertia (GEE, female, adjussted for multivariable)	0.016027	599
ACE2-Genome wide association study ATLAS.csv	1895	17903296	2007	Skeletal	Shaft Section Modulus (GEE, female, adjussted for multivariable)	0.029574	599
ACE2-Genome wide association study ATLAS.csv	1916	17903297	2007	Neurological	Temporal brain volume (FBAT, adjusted for multivariable)	0.030971	705
ACE2-Genome wide association study ATLAS.csv	1956	17903297	2007	Cognitive	Wide Range Achievement Test (FBAT, adjusted for multivariable)	0.005749	694
ACE2-Genome wide association study ATLAS.csv	1962	17903295	2007	Cognitive	Mean MMSE score for exam 5 and 7 (FBAT, adjusted for age)	0.043759	1038
ACE2-Genome wide association study ATLAS.csv	1964	17903295	2007	Cognitive	MMSE score (at exam 5, FBAT, adjusted for age)	0.02918	1038
ACE2-Genome wide association study ATLAS.csv	1970	17903295	2007	Cognitive	MMSE score (at exam 7, FBAT, adjusted for age)	0.011197	1038
ACE2-Genome wide association study ATLAS.csv	1988	17903295	2007	Mortality	Age at death (FBAT, adjusted for multivariable)	0.003971	1166
ACE2-Genome wide association study ATLAS.csv	1990	17903295	2007	Mortality	Age at death (FBAT, adjusted for birth-cohort)	0.001568	1345
ACE2-Genome wide association study ATLAS.csv	3819	21833088	2011	Neurological	Multiple Sclerosis	0.011833	27148
ACE2-Genome wide association study ATLAS.csv	3977	28724990	2017	Skeletal	Lean body mass (whole body)	0.047479	38292
ACE2-Genome wide association study ATLAS.csv	3982	29483656	2018	Psychiatric	Schizophrenia	0.030136	105318
ACE2-Genome wide association study ATLAS.csv	4105	29403010	2018	Metabolic	Albumin	0.029326	102223
ACE2-Genome wide association study ATLAS.csv	4123	29403010	2018	Metabolic	Activated partial thromboplastin time	0.0078561	37767
ACE2-Genome wide association study ATLAS.csv	4126	29403010	2018	Metabolic	Creatine kinase	0.02066	106080
ACE2-Genome wide association study ATLAS.csv	4145	29403010	2018	Cardiovascular	Pulse pressure	0.046655	136249
ACE2-Genome wide association study ATLAS.csv	4189	31217584	2019	Metabolic	Fasting glucose	0.0040672	23911
ACE2-Genome wide association study ATLAS.csv	4196	31217584	2019	Cardiovascular	Hypertension	0.042149	49141
ACE2-Genome wide association study ATLAS.csv	4200	31217584	2019	Skeletal	Height	0.023601	49796
ACE2-Genome wide association study ATLAS.csv	4266	30929738	2019	Respiratory	Asthma (child-onset)	0.030659	314633
ACE2-Genome wide association study ATLAS.csv	4333	30566500	2018	Endocrine	Polycystic ovary syndrome	0.020096	24267
ACE2-Genome wide association study ATLAS.csv	4361	30061737	2018	Cardiovascular	Atrial fibrillation	0.0011156	1030836
ACE2-Genome wide association study ATLAS.csv	4369	30367059	2018	Endocrine	Thyroid-stimulating hormone	0.040182	54288
ACE2-Genome wide association study ATLAS.csv	4371	30367059	2018	Endocrine	Thyroid-stimulating hormone (female)	0.00292	30236
ACE2-Genome wide association study ATLAS.csv	4392	29855537	2018	Reproduction	Menstrual pain medicine use	0.038167	11348
ACE2-Genome wide association study ATLAS.csv	4544	31676860	2019	Neurological	White matter	0.013046	19629
ACE-Genome wide association study ATLAS.csv	835	24816252	2014	Metabolic	Peptide::Dipeptide::X-14208--phenylalanylserine	1.2396e-14	2455
ACE-Genome wide association study ATLAS.csv	833	24816252	2014	Metabolic	Peptide::Dipeptide::X-14189--leucylalanine	1.5502e-14	2745
ACE-Genome wide association study ATLAS.csv	591	24816252	2014	Metabolic	Peptide::Dipeptide::aspartylphenylalanine	2.2727e-13	3948
ACE-Genome wide association study ATLAS.csv	834	24816252	2014	Metabolic	Peptide::Dipeptide::X-14205--alpha-glutamyltyrosine	3.5095e-13	1789
ACE-Genome wide association study ATLAS.csv	836	24816252	2014	Metabolic	Peptide::Dipeptide::X-14304--leucylalanine	3.5198e-13	2434
ACE-Genome wide association study ATLAS.csv	4043	30124842	2018	Skeletal	Height	2.2158e-12	693529
ACE-Genome wide association study ATLAS.csv	3187	31427789	2019	Skeletal	Standing height	4.8886e-12	385748
ACE-Genome wide association study ATLAS.csv	4378	30940143	2019	Cardiovascular	High blood pressure	7.7006e-11	458554
ACE-Genome wide association study ATLAS.csv	3597	31427789	2019	Cardiovascular	Non-cancer illness code, self-reported: hypertension	8.1415e-11	289307
ACE-Genome wide association study ATLAS.csv	3551	31427789	2019	Cardiovascular	Vascular/heart problems diagnosed by doctor: High blood pressure	1.0868e-10	385699
ACE-Genome wide association study ATLAS.csv	4224	31015401	2019	Environmental	Agents acting on the renin-angiotensin system	2.4585e-09	237530
ACE-Genome wide association study ATLAS.csv	832	24816252	2014	Metabolic	::::X-14086	4.2023e-09	2686
ACE-Genome wide association study ATLAS.csv	4094	30617256	2018	Neurological	Proxy and clinically diagnosed Alzheimer's disease	7.2881e-09	455258
ACE-Genome wide association study ATLAS.csv	4085	30297969	2018	Endocrine	Type 2 Diabetes	2.3461e-08	898130
ACE-Genome wide association study ATLAS.csv	4223	31015401	2019	Environmental	Calcium channel blockers	3.285e-07	204378
ACE-Genome wide association study ATLAS.csv	3591	31427789	2019	Activities	Medication for cholesterol, blood pressure or diabetes: Blood pressure medication	4.3887e-07	176050
ACE-Genome wide association study ATLAS.csv	4091	29777097	2018	Neurological	Proxy and clinically diagnosed Alzheimer's disease	4.8117e-07	388324
ACE-Genome wide association study ATLAS.csv	3630	31427789	2019	Environment	Illnesses of father: Lung cancer	1.8272e-06	355137
ACE-Genome wide association study ATLAS.csv	3412	31427789	2019	Skeletal	Sitting height	2.4435e-06	385393
ACE-Genome wide association study ATLAS.csv	4080	30239722	2018	Metabolic	Waist-hip ratio (adjusted for BMI)	3.356e-06	694649
ACE-Genome wide association study ATLAS.csv	3328	31427789	2019	Endocrine	Diabetes (diagnosed by doctor)	4.4018e-06	385420
ACE-Genome wide association study ATLAS.csv	4217	31015401	2019	Environmental	Drugs used in diabetes	4.983e-06	305913
ACE-Genome wide association study ATLAS.csv	4225	31015401	2019	Environmental	HMG CoA reductase inhibitors	8.0789e-06	290385
ACE-Genome wide association study ATLAS.csv	3271	31427789	2019	Skeletal	Comparative height size at age 10	1.0676e-05	380167
ACE-Genome wide association study ATLAS.csv	4086	30297969	2018	Endocrine	Type 2 Diabetes (adjusted for BMI)	1.3919e-05	898130
ACE-Genome wide association study ATLAS.csv	4200	31217584	2019	Skeletal	Height	1.5529e-05	49796
ACE-Genome wide association study ATLAS.csv	4090	29777097	2018	Environment	Family history of Alzheimer's disease	1.6705e-05	314278
ACE-Genome wide association study ATLAS.csv	142	25282103	2014	Skeletal	Height	2.2448e-05	253288
ACE-Genome wide association study ATLAS.csv	3491	31427789	2019	Nutritional	Cereal type: Muesli	2.4253e-05	319477
ACE-Genome wide association study ATLAS.csv	3555	31427789	2019	Activities	Medication for cholesterol, blood pressure, diabetes, or take exogenous hormones: Blood pressure medication	2.9489e-05	207533
ACE-Genome wide association study ATLAS.csv	4082	30239722	2018	Metabolic	Waist-hip ratio (adjusted for BMI, female)	3.0196e-05	379501
ACE-Genome wide association study ATLAS.csv	3613	31427789	2019	Activities	Treatment/medication code: simvastatin	3.2479e-05	280443
ACE-Genome wide association study ATLAS.csv	3470	31427789	2019	Metabolic	Impedance measures - Trunk fat-free mass	3.3289e-05	379507
ACE-Genome wide association study ATLAS.csv	3452	31427789	2019	Metabolic	Impedance measures - Leg fat percentage (right)	4.4473e-05	379806
ACE-Genome wide association study ATLAS.csv	3471	31427789	2019	Metabolic	Impedance measures - Trunk predicted mass	4.743e-05	379469
ACE-Genome wide association study ATLAS.csv	3912	28073927	2017	Ophthalmological	Cup area	5.5905e-05	22484
ACE-Genome wide association study ATLAS.csv	4077	30239722	2018	Metabolic	Waist-hip ratio	6.0493e-05	697734
ACE-Genome wide association study ATLAS.csv	4215	31015462	2019	Metabolic	Estimated glomerular filtration rate	7.2472e-05	350504
ACE-Genome wide association study ATLAS.csv	3460	31427789	2019	Metabolic	Impedance measures - Arm fat percentage (right)	0.00010388	379752
ACE-Genome wide association study ATLAS.csv	4045	30054458	2018	Endocrine	Type 2 Diabetes	0.00011561	659256
ACE-Genome wide association study ATLAS.csv	3415	31427789	2019	Cognitive	Reaction time test - Mean time to correctly identify matches	0.00012066	383748
ACE-Genome wide association study ATLAS.csv	3590	31427789	2019	Activities	Medication for cholesterol, blood pressure or diabetes: Cholesterol lowering medication	0.0001283	176050
ACE-Genome wide association study ATLAS.csv	3456	31427789	2019	Metabolic	Impedance measures - Leg fat percentage (left)	0.00013554	379786
ACE-Genome wide association study ATLAS.csv	10	23974872	2013	Psychiatric	Schizophrenia	0.00013626	32143
ACE-Genome wide association study ATLAS.csv	3441	31427789	2019	Metabolic	Impedance measures - Body fat percentage	0.00015023	379615
ACE-Genome wide association study ATLAS.csv	3651	31427789	2019	Environment	Illnesses of siblings: High blood pressure	0.00015054	309116
ACE-Genome wide association study ATLAS.csv	3339	31427789	2019	Reproduction	Age when periods started (menarche) (female)	0.00016362	202636
ACE-Genome wide association study ATLAS.csv	3464	31427789	2019	Metabolic	Impedance measures - Arm fat percentage (left)	0.00027021	379699
ACE-Genome wide association study ATLAS.csv	3691	31427789	2019	Cardiovascular	Diagnoses - secondary ICD10: I10 Essential (primary) hypertension	0.00029436	244890
ACE-Genome wide association study ATLAS.csv	3923	28613276	2017	Cardiovascular	Heart rate variability (RMSSD)	0.00030922	26785
ACE-Genome wide association study ATLAS.csv	3686	31427789	2019	Endocrine	Diagnoses - secondary ICD10: E11 Type 2 diabetes mellitus	0.00031946	244890
ACE-Genome wide association study ATLAS.csv	3191	31427789	2019	Activities	Number of treatments/medications taken	0.00034169	386581
ACE-Genome wide association study ATLAS.csv	4221	31015401	2019	Environmental	Diuretics	0.00034608	229086
ACE-Genome wide association study ATLAS.csv	4166	30108127	2018	Metabolic	Body Mass Index	0.00041345	334487
ACE-Genome wide association study ATLAS.csv	3633	31427789	2019	Environment	Illnesses of father: High blood pressure	0.00044557	355137
ACE-Genome wide association study ATLAS.csv	3829	26993346	2016	Neurological	Posterior cortical atrophy	0.00044767	10840
ACE-Genome wide association study ATLAS.csv	3424	31427789	2019	Cognitive	Symbol digit substitution test - Number of symbol digit matches made correctly	0.00046755	95669
ACE-Genome wide association study ATLAS.csv	3646	31427789	2019	Environment	Illnesses of mother: Alzheimer's disease/dementia	0.00048422	367939
ACE-Genome wide association study ATLAS.csv	4358	30177863	2018	Gastrointestinal	Diverticular disease	0.00050417	409728
ACE-Genome wide association study ATLAS.csv	3608	31427789	2019	Metabolic	Non-cancer illness code, self-reported: high cholesterol	0.00051606	289307
ACE-Genome wide association study ATLAS.csv	1063	17728769	2007	Psychiatric	Schizophrenia	0.00052867	2729
ACE-Genome wide association study ATLAS.csv	3379	31427789	2019	Cardiovascular	Diastolic Blood Pressure (automated reading)	0.000616	361411
ACE-Genome wide association study ATLAS.csv	1102	19060910	2009	Metabolic	High-density lipoprotein - Birth cohorts	0.00063862	4763
ACE-Genome wide association study ATLAS.csv	4109	29403010	2018	Metabolic	Serum creatinine	0.00066592	142097
ACE-Genome wide association study ATLAS.csv	3443	31427789	2019	Metabolic	Impedance measures - Whole body fat-free mass	0.00067462	379804
ACE-Genome wide association study ATLAS.csv	3444	31427789	2019	Metabolic	Impedance measures - Whole body water mass	0.00085607	379835
ACE-Genome wide association study ATLAS.csv	4057	27920155	2017	Metabolic	Estimated glomerular filtration rate based on serum creatinine	0.00093934	111666
ACE-Genome wide association study ATLAS.csv	595	24816252	2014	Metabolic	Peptide::Dipeptide::phenylalanylphenylalanine	0.00096066	4961
ACE-Genome wide association study ATLAS.csv	4110	29403010	2018	Metabolic	Estimated glomerular filtration rate	0.0010221	143658
ACE-Genome wide association study ATLAS.csv	3911	28073927	2017	Ophthalmological	Cup area	0.0010305	29817
ACE-Genome wide association study ATLAS.csv	4074	30239722	2018	Metabolic	Body Mass Index	0.0010366	806834
ACE-Genome wide association study ATLAS.csv	4088	29777097	2018	Environment	Paternal history of Alzheimer's disease	0.0011057	269279
ACE-Genome wide association study ATLAS.csv	4194	31217584	2019	Cardiovascular	Systolic Blood Pressure	0.001169	35433
ACE-Genome wide association study ATLAS.csv	4195	31217584	2019	Cardiovascular	Diastolic Blood Pressure	0.0012258	35433
ACE-Genome wide association study ATLAS.csv	4437	30053915	2018	Cell	Herpes simplex virus 2 IgG levels	0.0013151	208
ACE-Genome wide association study ATLAS.csv	3480	31427789	2019	Nutritional	Milk type used: Full cream	0.0013265	373135
ACE-Genome wide association study ATLAS.csv	4143	29403010	2018	Cardiovascular	Diastolic Blood Pressure	0.0013427	136615
ACE-Genome wide association study ATLAS.csv	3468	31427789	2019	Metabolic	Impedance measures - Trunk fat percentage	0.001413	379600
ACE-Genome wide association study ATLAS.csv	3673	31427789	2019	Gastrointestinal	Diagnoses - main ICD10: K57 Diverticular disease of intestine	0.0014518	300791
ACE-Genome wide association study ATLAS.csv	3498	31427789	2019	Dermatological	Hair colour (natural, before greying): Dark brown	0.0014844	385603
ACE-Genome wide association study ATLAS.csv	3577	31427789	2019	Social Interactions	Social support - Leisure/social activities: Pub or social club	0.0015293	385280
ACE-Genome wide association study ATLAS.csv	4144	29403010	2018	Cardiovascular	Mean arterial pressure	0.0015853	136482
ACE-Genome wide association study ATLAS.csv	146	25673413	2015	Metabolic	Body Mass Index	0.0016019	236231
ACE-Genome wide association study ATLAS.csv	4196	31217584	2019	Cardiovascular	Hypertension	0.0016645	49141
ACE-Genome wide association study ATLAS.csv	3908	28073927	2017	Ophthalmological	Vertical cup-disc ratio	0.0017771	32272
ACE-Genome wide association study ATLAS.csv	9	21926974	2011	Psychiatric	Schizophrenia	0.0020597	21856
ACE-Genome wide association study ATLAS.csv	3282	31427789	2019	Social Interactions	Number of full brothers	0.002081	380062
ACE-Genome wide association study ATLAS.csv	1212	27398621	2016	Endocrine	Type 2 Diabetes	0.002173	44414
ACE-Genome wide association study ATLAS.csv	4597	31676860	2019	Neurological	Right posterior cingulate	0.0021895	21821
ACE-Genome wide association study ATLAS.csv	3296	31427789	2019	Psychiatric	Risk taking	0.0022849	372651
ACE-Genome wide association study ATLAS.csv	4251	30952852	2019	Psychiatric	M10 timing	0.0023585	85670
ACE-Genome wide association study ATLAS.csv	147	26426971	2015	Metabolic	Body Mass Index (male > 50 yrs)	0.0025205	74324
ACE-Genome wide association study ATLAS.csv	143	25673413	2015	Metabolic	Body Mass Index	0.0025383	234069
ACE-Genome wide association study ATLAS.csv	3982	29483656	2018	Psychiatric	Schizophrenia	0.0025542	105318
ACE-Genome wide association study ATLAS.csv	4079	30239722	2018	Metabolic	Waist-hip ratio (female)	0.0025606	381152
ACE-Genome wide association study ATLAS.csv	4368	30150663	2018	Psychiatric	Cannabis use	0.0028595	162082
ACE-Genome wide association study ATLAS.csv	3288	31427789	2019	Psychiatric	Fed-up feelings	0.0028683	378357
ACE-Genome wide association study ATLAS.csv	3922	28613276	2017	Cardiovascular	Heart rate variability (SDNN)	0.0029296	28122
ACE-Genome wide association study ATLAS.csv	4222	31015401	2019	Environmental	Beta blocking agents	0.003168	224024
ACE-Genome wide association study ATLAS.csv	3601	31427789	2019	Endocrine	Non-cancer illness code, self-reported: diabetes	0.0031874	289307
ACE-Genome wide association study ATLAS.csv	4668	BioRxiv: https://doi.org/10.1101/288576	2019	Neurological	Uncinate fasciculus fractional anisotropy	0.0032012	17706
ACE-Genome wide association study ATLAS.csv	4249	30952852	2019	Psychiatric	Diurnal inactivity duration	0.0033257	84757
ACE-Genome wide association study ATLAS.csv	611	24816252	2014	Metabolic	Peptide::Polypeptide::HWESASXX*	0.0033498	7700
ACE-Genome wide association study ATLAS.csv	4076	30239722	2018	Metabolic	Body Mass Index (female)	0.0034128	434794
ACE-Genome wide association study ATLAS.csv	3723	31427789	2019	Psychiatric	Frequency of needing morning drink of alcohol after heavy drinking session in last year	0.0035577	69300
ACE-Genome wide association study ATLAS.csv	4442	30053915	2018	Cell	Epstein Barr Virus antigen EBNA IgG levels	0.0036842	914
ACE-Genome wide association study ATLAS.csv	4588	31676860	2019	Neurological	Right medial orbitofrontal	0.0038106	21821
ACE-Genome wide association study ATLAS.csv	800	24816252	2014	Metabolic	::::X-12749	0.0038534	7178
ACE-Genome wide association study ATLAS.csv	787	24816252	2014	Metabolic	::::X-12644	0.0038694	7795
ACE-Genome wide association study ATLAS.csv	2017	24369049	2014	Psychiatric	Lithium response in Bipolar I patients - Alda Scale of 6 to 7	0.0038766	294
ACE-Genome wide association study ATLAS.csv	680	24816252	2014	Metabolic	::::X-09789	0.0041938	7805
ACE-Genome wide association study ATLAS.csv	220	25772697	2015	Immunological	T:%Vd1	0.004266	669
ACE-Genome wide association study ATLAS.csv	3924	28613276	2017	Cardiovascular	Heart rate variability (pvRSA/HF)	0.0042891	24342
ACE-Genome wide association study ATLAS.csv	3291	31427789	2019	Psychiatric	Tense / 'highly strung'	0.0045103	374129
ACE-Genome wide association study ATLAS.csv	4002	29500382	2018	Psychiatric	Guilty feelings (GUILT)	0.0045539	265139
ACE-Genome wide association study ATLAS.csv	4487	31676860	2019	Neurological	Right medial orbitofrontal	0.0049389	19629
ACE-Genome wide association study ATLAS.csv	3408	31427789	2019	Psychiatric	Average weekly intake of other alcoholic drinks	0.0049478	91288
ACE-Genome wide association study ATLAS.csv	3909	28073927	2017	Ophthalmological	Vertical cup-disc ratio	0.0050149	23899
ACE-Genome wide association study ATLAS.csv	4593	31676860	2019	Neurological	Right pars orbitalis	0.0052217	21821
ACE-Genome wide association study ATLAS.csv	4492	31676860	2019	Neurological	Right pars orbitalis	0.0053037	19629
ACE-Genome wide association study ATLAS.csv	3414	31427789	2019	Metabolic	Birth weight	0.0053345	219088
ACE-Genome wide association study ATLAS.csv	4142	29403010	2018	Cardiovascular	Systolic Blood Pressure	0.0053798	136597
ACE-Genome wide association study ATLAS.csv	3635	31427789	2019	Environment	Illnesses of father: Alzheimer's disease/dementia	0.0053871	355137
ACE-Genome wide association study ATLAS.csv	3995	29500382	2018	Psychiatric	Fed-up feelings (FED_UP)	0.0055686	266208
ACE-Genome wide association study ATLAS.csv	4496	31676860	2019	Neurological	Right posterior cingulate	0.005593	19629
ACE-Genome wide association study ATLAS.csv	3278	31427789	2019	Mortality	Father still alive	0.0056177	375841
ACE-Genome wide association study ATLAS.csv	3005	28240269	2017	Cell	EIF4A3 - Eukaryotic initiation factor 4A-III	0.0056361	1000
ACE-Genome wide association study ATLAS.csv	4556	31676860	2019	Neurological	Left lingual	0.0059447	21821
ACE-Genome wide association study ATLAS.csv	4083	28566273	2017	Endocrine	Type 2 Diabetes	0.006003	159208
ACE-Genome wide association study ATLAS.csv	2016	24369049	2014	Psychiatric	Lithium response in Bipolar I patients - Alda Scale of 5 to 6	0.0063523	294
ACE-Genome wide association study ATLAS.csv	4089	29777097	2018	Environment	Maternal history of Alzheimer's disease	0.0063751	288676
ACE-Genome wide association study ATLAS.csv	94	27680694	2016	Metabolic	Birth weight	0.0064816	143677
ACE-Genome wide association study ATLAS.csv	3554	31427789	2019	Activities	Medication for cholesterol, blood pressure, diabetes, or take exogenous hormones: Cholesterol lowering medication	0.0065903	207533
ACE-Genome wide association study ATLAS.csv	11	25056061	2014	Psychiatric	Schizophrenia	0.006627	82315
ACE-Genome wide association study ATLAS.csv	13	24280982	2014	Psychiatric	Schizophrenia vs Bipolar disorder	0.006627	16381
ACE-Genome wide association study ATLAS.csv	3958	28979981	2017	Psychiatric	Antisocial behavior (male)	0.0069676	8535
ACE-Genome wide association study ATLAS.csv	272	25772697	2015	Immunological	CD4:%RTE	0.0070963	669
ACE-Genome wide association study ATLAS.csv	4701	BioRxiv: https://doi.org/10.1101/288609	2019	Neurological	Genu of corpus callosum mean diusivities	0.0075382	17706
ACE-Genome wide association study ATLAS.csv	431	24816252	2014	Metabolic	Amino acid::Valine, leucine and isoleucine metabolism::leucine	0.007643	7799
ACE-Genome wide association study ATLAS.csv	6	26754954	2016	Psychiatric	Anxiety disorder (case/control)	0.0076607	17310
ACE-Genome wide association study ATLAS.csv	95	27680694	2016	Metabolic	Birth weight	0.007722	153781
ACE-Genome wide association study ATLAS.csv	34	24162737	2013	Neurological	Alzheimer's disease	0.0078724	54162
ACE-Genome wide association study ATLAS.csv	2375	28240269	2017	Cell	CD33 - Myeloid cell surface antigen CD33	0.0079001	1000
ACE-Genome wide association study ATLAS.csv	348	25772697	2015	Immunological	CD8:%R5+	0.0079527	669
ACE-Genome wide association study ATLAS.csv	2020	23143601	2012	Neoplasms	Adenocarcinoma (adjusted for age)	0.0080404	8881
ACE-Genome wide association study ATLAS.csv	4434	30053915	2018	Cell	Measles IgG levels	0.008516	885
ACE-Genome wide association study ATLAS.csv	4367	30003307	2018	Cardiovascular	Coronary artery disease in diabetes	0.0085422	15666
ACE-Genome wide association study ATLAS.csv	1187	22451204	2012	Neurological	Parkinson disease	0.0086338	8477
ACE-Genome wide association study ATLAS.csv	3454	31427789	2019	Metabolic	Impedance measures - Leg fat-free mass (right)	0.0086608	379793
ACE-Genome wide association study ATLAS.csv	113	20881960	2010	Skeletal	Height	0.0088526	133653
ACE-Genome wide association study ATLAS.csv	3362	31427789	2019	Mortality	Mother's age at death	0.0088549	227076
ACE-Genome wide association study ATLAS.csv	3585	31427789	2019	Activities	Types of physical activity in last 4 weeks: Walking for pleasure (not as a means of transport)	0.0089587	384450
ACE-Genome wide association study ATLAS.csv	3295	31427789	2019	Psychiatric	Guilty feelings	0.0090887	376361
ACE-Genome wide association study ATLAS.csv	3223	31427789	2019	Activities	Length of mobile phone use	0.0094883	381616
ACE-Genome wide association study ATLAS.csv	4628	31676860	2019	Neurological	Left accumbens area	0.010135	21821
ACE-Genome wide association study ATLAS.csv	257	25772697	2015	Immunological	CD8:%Senescent	0.010288	669
ACE-Genome wide association study ATLAS.csv	3455	31427789	2019	Metabolic	Impedance measures - Leg predicted mass (right)	0.010297	379793
ACE-Genome wide association study ATLAS.csv	3446	31427789	2019	Metabolic	Impedance measures - Basal metabolic rate	0.01049	379821
ACE-Genome wide association study ATLAS.csv	2018	24369049	2014	Psychiatric	Lithium response in Bipolar I patients - Alda Scale of 7 to 8	0.010599	294
ACE-Genome wide association study ATLAS.csv	2155	28240269	2017	Cell	C3 - Complement C3b, inactivated	0.010614	1000
ACE-Genome wide association study ATLAS.csv	2030	28067908	2017	Gastrointestinal	Ulcerative colitis	0.010984	45975
ACE-Genome wide association study ATLAS.csv	3432	31427789	2019	Cognitive	Symbol digit substitution test - Number of symbol digit matches attempted	0.011027	95669
ACE-Genome wide association study ATLAS.csv	3998	29500382	2018	Psychiatric	Tense / 'highly strung' (TENSE)	0.011089	263635
ACE-Genome wide association study ATLAS.csv	1125	27918534	2017	Metabolic	Subcutaneous adipose tissue attenuation (female)	0.011275	9526
ACE-Genome wide association study ATLAS.csv	3513	31427789	2019	Activities	Gas or solid-fuel cooking/heating: A gas hob or gas cooker	0.011363	385289
ACE-Genome wide association study ATLAS.csv	3192	31427789	2019	Activities	Length of time at current address	0.011485	385315
ACE-Genome wide association study ATLAS.csv	120	23563607	2013	Metabolic	Obesity class 1	0.011488	98697
ACE-Genome wide association study ATLAS.csv	3856	27863252	2016	Immunological	Myeloid white cell count (two-way meta)	0.011554	130268
ACE-Genome wide association study ATLAS.csv	4050	28358823	2017	Body Structures	Anterior cruciate ligament rupture (fixed effect model)	0.011757	99342
ACE-Genome wide association study ATLAS.csv	144	25673413	2015	Metabolic	Body Mass Index (male)	0.011993	104666
ACE-Genome wide association study ATLAS.csv	58	23722424	2013	Environment	College completion	0.012208	95427
ACE-Genome wide association study ATLAS.csv	4455	31676860	2019	Neurological	Left lingual	0.01233	19629
ACE-Genome wide association study ATLAS.csv	4044	30124842	2018	Metabolic	Body Mass Index	0.012422	681275
ACE-Genome wide association study ATLAS.csv	3462	31427789	2019	Metabolic	Impedance measures - Arm fat-free mass (right)	0.012508	379723
ACE-Genome wide association study ATLAS.csv	2722	28240269	2017	Cell	PSMD7 - 26S proteasome non-ATPase regulatory subunit 7	0.01271	1000
ACE-Genome wide association study ATLAS.csv	2083	28240269	2017	Cell	APCS - Serum amyloid P-component	0.013599	1000
ACE-Genome wide association study ATLAS.csv	1058	18057069	2007	Neurological	Amyotrophic lateral sclerosis	0.014456	432
ACE-Genome wide association study ATLAS.csv	24	27663945	2016	Psychiatric	Attention deficit hyperactivity disorder	0.014466	17666
ACE-Genome wide association study ATLAS.csv	4686	BioRxiv: https://doi.org/10.1101/288594	2019	Neurological	Superior corona radiata axial diusivities	0.014604	17706
ACE-Genome wide association study ATLAS.csv	3571	31427789	2019	Neurological	Pain type(s) experienced in last month: Neck or shoulder pain	0.014618	385698
ACE-Genome wide association study ATLAS.csv	3270	31427789	2019	Metabolic	Comparative body size at age 10	0.014642	379749
ACE-Genome wide association study ATLAS.csv	3463	31427789	2019	Metabolic	Impedance measures - Arm predicted mass (right)	0.014767	379716
ACE-Genome wide association study ATLAS.csv	4055	27920155	2017	Metabolic	Estimated glomerular filtration rate based on serum creatinine (non-diabetic)	0.014978	94677
ACE-Genome wide association study ATLAS.csv	76	23455636	2013	Ophthalmological	Neovascular disease	0.015055	54938
ACE-Genome wide association study ATLAS.csv	4719	BioRxiv: https://doi.org/10.1101/288627	2019	Neurological	Corticospinal tract mode of anisotropy	0.015146	17706
ACE-Genome wide association study ATLAS.csv	1152	24699409	2014	Metabolic	Incremental insulin 30 min	0.0152	4447
ACE-Genome wide association study ATLAS.csv	4709	BioRxiv: https://doi.org/10.1101/288617	2019	Neurological	Superior fronto-occipital fasciculus mean diusivities	0.015341	17706
ACE-Genome wide association study ATLAS.csv	388	24816252	2014	Metabolic	Amino acid::Lysine metabolism::glutaroyl carnitine	0.015346	7701
ACE-Genome wide association study ATLAS.csv	4107	29403010	2018	Metabolic	Albumin/globulin ratio	0.015369	98626
ACE-Genome wide association study ATLAS.csv	2019	23143601	2012	Neoplasms	Lung canger (adjusted for age)	0.015389	8881
ACE-Genome wide association study ATLAS.csv	3841	27863252	2016	Immunological	Granulocyte count (two-way meta)	0.015495	130875
ACE-Genome wide association study ATLAS.csv	3868	27863252	2016	Immunological	White blood cell count (two-way meta)	0.015511	131969
ACE-Genome wide association study ATLAS.csv	4746	BioRxiv: https://doi.org/10.1101/288654	2019	Neurological	Inferior fronto-occipital fasciculus radial diusivities	0.015514	17706
ACE-Genome wide association study ATLAS.csv	4259	30946739	2019	Activities	Facial attractiveness (female-coder, male samples)	0.016502	1792
ACE-Genome wide association study ATLAS.csv	4038	29906448	2018	Psychiatric	Schizophrenia	0.016567	87491
ACE-Genome wide association study ATLAS.csv	3231	31427789	2019	Psychiatric	Nap during day	0.017062	386124
ACE-Genome wide association study ATLAS.csv	4145	29403010	2018	Cardiovascular	Pulse pressure	0.017374	136249
ACE-Genome wide association study ATLAS.csv	2041	27656889	2016	Cognitive	Attention function - Hit reaction time - Child	0.017419	1655
ACE-Genome wide association study ATLAS.csv	4708	BioRxiv: https://doi.org/10.1101/288616	2019	Neurological	Superior corona radiata mean diusivities	0.017797	17706
ACE-Genome wide association study ATLAS.csv	3658	31427789	2019	Neoplasms	Cancer register - Type of cancer: ICD10: C44 Other and unspecified malignant neoplasm of skin	0.017829	54696
ACE-Genome wide association study ATLAS.csv	3445	31427789	2019	Metabolic	Impedance measures - Body Mass Index (BMI)	0.017876	379831
ACE-Genome wide association study ATLAS.csv	3857	27863252	2016	Immunological	Sum neutrophil eosinophil count (two-way meta)	0.017942	131409
ACE-Genome wide association study ATLAS.csv	3210	31427789	2019	Activities	Usual walking pace	0.018931	384081
ACE-Genome wide association study ATLAS.csv	1154	24699409	2014	Metabolic	Insulin at 30 min	0.018957	4483
ACE-Genome wide association study ATLAS.csv	4128	29403010	2018	Metabolic	C-reactive protein	0.018995	75391
ACE-Genome wide association study ATLAS.csv	4651	BioRxiv: https://doi.org/10.1101/288559	2019	Neurological	Cingulum (cingulate gyrus) fractional anisotropy	0.019004	17706
ACE-Genome wide association study ATLAS.csv	4658	BioRxiv: https://doi.org/10.1101/288566	2019	Neurological	Inferior fronto-occipital fasciculus fractional anisotropy	0.019022	17706
ACE-Genome wide association study ATLAS.csv	126	23754948	2013	Skeletal	Height (male)	0.019279	60588
ACE-Genome wide association study ATLAS.csv	2031	28067908	2017	Gastrointestinal	Inflammatory Bowel Disease	0.019451	59957
ACE-Genome wide association study ATLAS.csv	4068	BioRxiv: https://doi.org/10.1101/261081	2018	Activities	Automobile speeding propensity	0.019454	404291
ACE-Genome wide association study ATLAS.csv	610	24816252	2014	Metabolic	Peptide::Polypeptide::bradykinin, des-arg(9)	0.019681	4570
ACE-Genome wide association study ATLAS.csv	4745	BioRxiv: https://doi.org/10.1101/288653	2019	Neurological	Genu of corpus callosum radial diusivities	0.019952	17706
ACE-Genome wide association study ATLAS.csv	2015	24369049	2014	Psychiatric	Lithium response in Bipolar I patients - Alda Scale of 4 to 5	0.020018	294
ACE-Genome wide association study ATLAS.csv	826	24816252	2014	Metabolic	::::X-13658	0.020102	1412
ACE-Genome wide association study ATLAS.csv	4305	30664634	2019	Metabolic	Trunk-trunk fat ratio (male)	0.020272	167431
ACE-Genome wide association study ATLAS.csv	635	24816252	2014	Metabolic	Xenobiotics::Food component, Plant::saccharin	0.020472	2449
ACE-Genome wide association study ATLAS.csv	7	26754954	2016	Psychiatric	Anxiety disorder (factor score)	0.020536	18186
ACE-Genome wide association study ATLAS.csv	317	25772697	2015	Immunological	CD8mem:%"Th2"	0.020608	669
ACE-Genome wide association study ATLAS.csv	4331	30595539	2018	Dermatological	Postburn scar height	0.020971	665
ACE-Genome wide association study ATLAS.csv	2348	28240269	2017	Cell	IL4R - Interleukin-4 receptor subunit alpha	0.021221	1000
ACE-Genome wide association study ATLAS.csv	3466	31427789	2019	Metabolic	Impedance measures - Arm fat-free mass (left)	0.021325	379653
ACE-Genome wide association study ATLAS.csv	4505	31676860	2019	Neurological	Right transverse temporal	0.021371	19629
ACE-Genome wide association study ATLAS.csv	2024	23089632	2013	Psychiatric	Alcohol dependence	0.021405	2322
ACE-Genome wide association study ATLAS.csv	262	25772697	2015	Immunological	CD8:%Naive	0.02148	669
ACE-Genome wide association study ATLAS.csv	1228	17052657	2006	Neurological	Parkinson Disease (additive model)	0.021875	537
ACE-Genome wide association study ATLAS.csv	3372	31427789	2019	Respiratory	Age hay fever, rhinitis or eczema diagnosed	0.021883	77452
ACE-Genome wide association study ATLAS.csv	414	24816252	2014	Metabolic	Amino acid::Urea cycle; arginine-, proline-, metabolism::homocitrulline	0.022052	4135
ACE-Genome wide association study ATLAS.csv	3435	31427789	2019	Metabolic	Body Mass Index	0.0222	385336
ACE-Genome wide association study ATLAS.csv	3389	31427789	2019	Social Interactions	Friendships satisfaction	0.022679	127735
ACE-Genome wide association study ATLAS.csv	3283	31427789	2019	Social Interactions	Number of full sisters	0.023103	380122
ACE-Genome wide association study ATLAS.csv	2238	28240269	2017	Cell	SPINT2 - Kunitz-type protease inhibitor 2	0.023516	1000
ACE-Genome wide association study ATLAS.csv	4360	30102696	2018	Gastrointestinal	Biliary atresia	0.023648	2427
ACE-Genome wide association study ATLAS.csv	4527	31676860	2019	Neurological	Left accumbens area	0.023711	19629
ACE-Genome wide association study ATLAS.csv	3467	31427789	2019	Metabolic	Impedance measures - Arm predicted mass (left)	0.024405	379638
ACE-Genome wide association study ATLAS.csv	762	24816252	2014	Metabolic	::::X-12212	0.024776	4566
ACE-Genome wide association study ATLAS.csv	3684	31427789	2019	Infection	Diagnoses - main ICD10: R31 Hematuria	0.02481	300791
ACE-Genome wide association study ATLAS.csv	3836	27863252	2016	Immunological	Sum basophil neutrophil count (two-way meta)	0.025782	131031
ACE-Genome wide association study ATLAS.csv	4095	28416822	2017	Cardiovascular	Atrial Fibrillation	0.025836	36792
ACE-Genome wide association study ATLAS.csv	3512	31427789	2019	Psychiatric	Type of tobacco previously smoked: Manufactured cigarettes	0.026284	95358
ACE-Genome wide association study ATLAS.csv	18	20418890	2010	Psychiatric	Former versus current smokers	0.02631	41278
ACE-Genome wide association study ATLAS.csv	2770	28240269	2017	Cell	AKR1A1 - Alcohol dehydrogenase [NADP(+)]	0.026385	1000
ACE-Genome wide association study ATLAS.csv	2565	28240269	2017	Cell	PRTN3 - Myeloblastin	0.026813	1000
ACE-Genome wide association study ATLAS.csv	4106	29403010	2018	Metabolic	Non-albumin protein	0.026983	98538
ACE-Genome wide association study ATLAS.csv	690	24816252	2014	Metabolic	::::X-11261	0.027074	7771
ACE-Genome wide association study ATLAS.csv	3411	31427789	2019	Mortality	Interpolated Age of participant when non-cancer illness first diagnosed	0.027228	277734
ACE-Genome wide association study ATLAS.csv	2979	28240269	2017	Cell	ATP5B - ATP synthase subunit beta, mitochondrial	0.027277	1000
ACE-Genome wide association study ATLAS.csv	2921	28240269	2017	Cell	LPO - Lactoperoxidase	0.027294	1000
ACE-Genome wide association study ATLAS.csv	3410	31427789	2019	Mortality	Interpolated Year when non-cancer illness first diagnosed	0.027386	277734
ACE-Genome wide association study ATLAS.csv	4281	30804560	2019	Respiratory	PEF	0.027451	345265
ACE-Genome wide association study ATLAS.csv	2197	28240269	2017	Cell	HPX - Hemopexin	0.027673	1000
ACE-Genome wide association study ATLAS.csv	3859	27863252	2016	Immunological	Neutrophil count (two-way meta)	0.028203	131564
ACE-Genome wide association study ATLAS.csv	4084	28566273	2017	Endocrine	Type 2 Diabetes (adjusted for BMI)	0.028692	159208
ACE-Genome wide association study ATLAS.csv	4073	BioRxiv: https://doi.org/10.1101/261081	2018	Activities	General risk tolerance	0.029051	466571
ACE-Genome wide association study ATLAS.csv	3582	31427789	2019	Activities	Types of transport used (excluding work): Walk	0.029075	384551
ACE-Genome wide association study ATLAS.csv	565	24816252	2014	Metabolic	Lipid::Monoacylglycerol::1-stearoylglycerol (1-monostearin)	0.029083	6965
ACE-Genome wide association study ATLAS.csv	331	25772697	2015	Immunological	NKeff:%Act(314+)	0.029403	669
ACE-Genome wide association study ATLAS.csv	4562	31676860	2019	Neurological	Left pars orbitalis	0.029468	21821
ACE-Genome wide association study ATLAS.csv	3219	31427789	2019	Activities	Time spent watching television (TV)	0.029713	365236
ACE-Genome wide association study ATLAS.csv	4569	31676860	2019	Neurological	Left rostral anterior cingulate	0.03028	21821
ACE-Genome wide association study ATLAS.csv	3349	31427789	2019	Reproduction	Ever used hormone-replacement therapy (HRT) (female)	0.030671	208012
ACE-Genome wide association study ATLAS.csv	3902	27863252	2016	Immunological	Reticulocyte count (three-way meta)	0.030818	170641
ACE-Genome wide association study ATLAS.csv	604	24816252	2014	Metabolic	Peptide::gamma-glutamyl::gamma-glutamylleucine	0.031248	7802
ACE-Genome wide association study ATLAS.csv	263	25772697	2015	Immunological	DNT:%CD127+TEF	0.031378	669
ACE-Genome wide association study ATLAS.csv	2849	28240269	2017	Cell	SIGLEC1 - Sialoadhesin	0.0317	1000
ACE-Genome wide association study ATLAS.csv	4155	29403010	2018	Cardiovascular	E/A ratio	0.032375	8600
ACE-Genome wide association study ATLAS.csv	4734	BioRxiv: https://doi.org/10.1101/288642	2019	Neurological	Uncinate fasciculus mode of anisotropy	0.03262	17706
ACE-Genome wide association study ATLAS.csv	4293	30718901	2019	Psychiatric	Depression	0.03313	500199
ACE-Genome wide association study ATLAS.csv	4193	31217584	2019	Cardiovascular	PR interval	0.03325	17422
ACE-Genome wide association study ATLAS.csv	4247	30980028	2019	Cognitive	Ambidextrousness	0.033896	331037
ACE-Genome wide association study ATLAS.csv	3477	31427789	2019	Activities	Own or rent accommodation lived in: Own with a mortgage	0.034205	383032
ACE-Genome wide association study ATLAS.csv	4051	28358823	2017	Body Structures	Anterior cruciate ligament rupture (random effect model)	0.034688	99342
ACE-Genome wide association study ATLAS.csv	4404	29855537	2018	Reproduction	Menstrual quality of life impact: Nervousness	0.035882	11348
ACE-Genome wide association study ATLAS.csv	3700	31427789	2019	Connective Tissue	Diagnoses - secondary ICD10: M13 Other arthritis	0.03592	244890
ACE-Genome wide association study ATLAS.csv	260	25772697	2015	Immunological	CD8:%TE	0.036317	669
ACE-Genome wide association study ATLAS.csv	4092	29844566	2018	Cognitive	Reaction time	0.036574	330069
ACE-Genome wide association study ATLAS.csv	3458	31427789	2019	Metabolic	Impedance measures - Leg fat-free mass (left)	0.037	379766
ACE-Genome wide association study ATLAS.csv	3459	31427789	2019	Metabolic	Impedance measures - Leg predicted mass (left)	0.037358	379761
ACE-Genome wide association study ATLAS.csv	167	25673412	2015	Metabolic	Waist circumference	0.037647	232101
ACE-Genome wide association study ATLAS.csv	2404	28240269	2017	Cell	KLK5 - Kallikrein-5	0.038113	1000
ACE-Genome wide association study ATLAS.csv	168	25673412	2015	Metabolic	Waist circumference	0.038571	244441
ACE-Genome wide association study ATLAS.csv	4753	BioRxiv: https://doi.org/10.1101/288661	2019	Neurological	Superior fronto-occipital fasciculus radial diusivities	0.039268	17706
ACE-Genome wide association study ATLAS.csv	4315	30643251	2019	Psychiatric	Cigarettes per day	0.039281	263954
ACE-Genome wide association study ATLAS.csv	2278	28240269	2017	Cell	ESR1 - Estrogen receptor	0.039452	1000
ACE-Genome wide association study ATLAS.csv	3276	31427789	2019	Activities	Facial ageing	0.039465	354097
ACE-Genome wide association study ATLAS.csv	2993	28240269	2017	Cell	FABP5 - Fatty acid-binding protein, epidermal	0.039698	1000
ACE-Genome wide association study ATLAS.csv	4510	31676860	2019	Neurological	Left basal forebrain	0.039789	19629
ACE-Genome wide association study ATLAS.csv	1110	27918534	2017	Metabolic	Subcutaneous adipose tissue volume (female)	0.03991	9526
ACE-Genome wide association study ATLAS.csv	3600	31427789	2019	Gastrointestinal	Non-cancer illness code, self-reported: gastro-oesophageal reflux (gord) / gastric reflux	0.04003	289307
ACE-Genome wide association study ATLAS.csv	4611	31676860	2019	Neurological	Left basal forebrain	0.040827	21821
ACE-Genome wide association study ATLAS.csv	12	24280982	2014	Psychiatric	Schizophrenia/Bipolar disorder	0.041331	39202
ACE-Genome wide association study ATLAS.csv	208	20453842	2010	Connective Tissue	Rheumatoid Arthritis	0.041404	25708
ACE-Genome wide association study ATLAS.csv	3937	28878392	2017	Metabolic	Fucosylation	0.041571	2078
ACE-Genome wide association study ATLAS.csv	3822	26394269	2015	Gastrointestinal	Primary biliary cirrhosis	0.041582	13239
ACE-Genome wide association study ATLAS.csv	1071	16775037	2006	Endocrine	Diabetic Nephropathy in Type 1 Diabetes	0.041767	1889
ACE-Genome wide association study ATLAS.csv	3983	29358691	2018	Endocrine	Type 2 Diabetes	0.0422	70127
ACE-Genome wide association study ATLAS.csv	3611	31427789	2019	Activities	Treatment/medication code: lisinopril	0.04227	280443
ACE-Genome wide association study ATLAS.csv	4739	BioRxiv: https://doi.org/10.1101/288647	2019	Neurological	Cingulum (cingulate gyrus) radial diusivities	0.042339	17706
ACE-Genome wide association study ATLAS.csv	3929	28749367	2017	Cardiovascular	QT interval	0.042423	22158
ACE-Genome wide association study ATLAS.csv	4461	31676860	2019	Neurological	Left pars orbitalis	0.042547	19629
ACE-Genome wide association study ATLAS.csv	3431	31427789	2019	Cognitive	Fluid intelligence test - Fluid intelligence score	0.04296	99739
ACE-Genome wide association study ATLAS.csv	2084	28240269	2017	Cell	KIT - Mast/stem cell growth factor receptor Kit	0.043567	1000
ACE-Genome wide association study ATLAS.csv	3267	31427789	2019	Psychiatric	Alcohol usually taken with meals	0.043699	197613
ACE-Genome wide association study ATLAS.csv	4274	30846698	2019	Psychiatric	Short sleep	0.044085	411934
ACE-Genome wide association study ATLAS.csv	4056	27920155	2017	Metabolic	Estimated glomerular filtration rate based on serum creatinine (non-diabetic)	0.044637	6597
ACE-Genome wide association study ATLAS.csv	2519	28240269	2017	Cell	FN1 - Fibronectin Fragment 4	0.045415	1000
ACE-Genome wide association study ATLAS.csv	3872	27863252	2016	Immunological	Sum basophil neutrophil count (three-way meta)	0.045583	170143
ACE-Genome wide association study ATLAS.csv	3877	27863252	2016	Immunological	Granulocyte count (three-way meta)	0.045926	169822
ACE-Genome wide association study ATLAS.csv	3861	27863252	2016	Immunological	Plateletcrit (two-way meta)	0.04636	127033
ACE-Genome wide association study ATLAS.csv	3476	31427789	2019	Activities	Own or rent accommodation lived in: Own outright (by you or someone in your household)	0.046453	383032
ACE-Genome wide association study ATLAS.csv	4691	BioRxiv: https://doi.org/10.1101/288599	2019	Neurological	Anterior corona radiata mean diusivities	0.046616	17706
ACE-Genome wide association study ATLAS.csv	3380	31427789	2019	Cardiovascular	Systolic Blood Pressure (automated reading)	0.04693	361402
ACE-Genome wide association study ATLAS.csv	3660	31427789	2019	Neoplasms	Cancer register - Histology of cancer tumour: Basal cell carcinoma, NOS	0.047156	60692
ACE-Genome wide association study ATLAS.csv	349	25772697	2015	Immunological	CD8:%TM (2)	0.047188	669
ACE-Genome wide association study ATLAS.csv	368	24816252	2014	Metabolic	Amino acid::Butanoate metabolism::2-aminobutyrate	0.04748	7814
ACE-Genome wide association study ATLAS.csv	624	24816252	2014	Metabolic	Xenobiotics::Drug::hydroquinone sulfate	0.047886	451
ACE-Genome wide association study ATLAS.csv	4606	31676860	2019	Neurological	Right transverse temporal	0.048022	21821
ACE-Genome wide association study ATLAS.csv	149	26426971	2015	Metabolic	Body Mass Index (female > 50 yrs)	0.048208	88625
ACE-Genome wide association study ATLAS.csv	3792	30804565	2019	Psychiatric	Daytime napping	0.048641	386577
ACE-Genome wide association study ATLAS.csv	2188	28240269	2017	Cell	C1QA C1QB C1QC - Complement C1q subcomponent	0.049453	1000
ACE-Genome wide association study ATLAS.csv	2557	28240269	2017	Cell	IL17A - Interleukin-17A	0.049485	1000
ACE-Genome wide association study ATLAS.csv	4207	31152163	2019	Metabolic	Blood urea nitrogen	0.049553	416178
ACE-Genome wide association study ATLAS.csv	1176	27992416	2017	Psychiatric	Excessive daytime sleepness (male)	0.049647	52638
ACE-Genome wide association study ATLAS.csv	145	25673413	2015	Metabolic	Body Mass Index (female)	0.049853	132115
AGT-Genome wide association study ATLAS.csv	3597	31427789	2019	Cardiovascular	Non-cancer illness code, self-reported: hypertension	1.5586e-14	289307
AGT-Genome wide association study ATLAS.csv	3555	31427789	2019	Activities	Medication for cholesterol, blood pressure, diabetes, or take exogenous hormones: Blood pressure medication	2.8248e-14	207533
AGT-Genome wide association study ATLAS.csv	3551	31427789	2019	Cardiovascular	Vascular/heart problems diagnosed by doctor: High blood pressure	2.9847e-14	385699
AGT-Genome wide association study ATLAS.csv	4378	30940143	2019	Cardiovascular	High blood pressure	5.5234e-14	458554
AGT-Genome wide association study ATLAS.csv	3379	31427789	2019	Cardiovascular	Diastolic Blood Pressure (automated reading)	4.1547e-13	361411
AGT-Genome wide association study ATLAS.csv	3380	31427789	2019	Cardiovascular	Systolic Blood Pressure (automated reading)	6.6919e-11	361402
AGT-Genome wide association study ATLAS.csv	3644	31427789	2019	Environment	Illnesses of mother: High blood pressure	1.8483e-10	367939
AGT-Genome wide association study ATLAS.csv	3691	31427789	2019	Cardiovascular	Diagnoses - secondary ICD10: I10 Essential (primary) hypertension	2.1874e-10	244890
AGT-Genome wide association study ATLAS.csv	4224	31015401	2019	Environmental	Agents acting on the renin-angiotensin system	2.9478e-10	237530
AGT-Genome wide association study ATLAS.csv	4222	31015401	2019	Environmental	Beta blocking agents	7.6882e-10	224024
AGT-Genome wide association study ATLAS.csv	4221	31015401	2019	Environmental	Diuretics	2.6104e-07	229086
AGT-Genome wide association study ATLAS.csv	3617	31427789	2019	Activities	Treatment/medication code: atenolol	6.6465e-07	280443
AGT-Genome wide association study ATLAS.csv	2547	28240269	2017	Cell	AGT - Angiotensinogen	6.6725e-07	1000
AGT-Genome wide association study ATLAS.csv	3590	31427789	2019	Activities	Medication for cholesterol, blood pressure or diabetes: Cholesterol lowering medication	1.4724e-05	176050
AGT-Genome wide association study ATLAS.csv	3147	28240269	2017	Cell	CASP10 - Caspase-10	5.1126e-05	1000
AGT-Genome wide association study ATLAS.csv	3626	31427789	2019	Activities	Treatment/medication code: bendroflumethiazide	6.4025e-05	280443
AGT-Genome wide association study ATLAS.csv	4223	31015401	2019	Environmental	Calcium channel blockers	7.0394e-05	204378
AGT-Genome wide association study ATLAS.csv	3591	31427789	2019	Activities	Medication for cholesterol, blood pressure or diabetes: Blood pressure medication	7.7173e-05	176050
AGT-Genome wide association study ATLAS.csv	3632	31427789	2019	Environment	Illnesses of father: Chronic bronchitis/emphysema	8.3566e-05	355137
AGT-Genome wide association study ATLAS.csv	3008	28240269	2017	Cell	SCGB2A1 - Mammaglobin-B	0.0001412	1000
AGT-Genome wide association study ATLAS.csv	3359	31427789	2019	Cardiovascular	Age high blood pressure diagnosed	0.00014318	92583
AGT-Genome wide association study ATLAS.csv	4006	29559693	2018	Skeletal	Osteoarthritis (hospital diagnosed)	0.00014444	50508
AGT-Genome wide association study ATLAS.csv	2446	28240269	2017	Cell	SERPIND1 - Heparin cofactor 2	0.00017547	1000
AGT-Genome wide association study ATLAS.csv	3557	31427789	2019	Activities	Medication for pain relief, constipation, heartburn: Aspirin	0.00018246	382089
AGT-Genome wide association study ATLAS.csv	2285	28240269	2017	Cell	MMP8 - Neutrophil collagenase	0.00018503	1000
AGT-Genome wide association study ATLAS.csv	3191	31427789	2019	Activities	Number of treatments/medications taken	0.00020953	386581
AGT-Genome wide association study ATLAS.csv	2237	28240269	2017	Cell	ICAM2 - Intercellular adhesion molecule 2	0.00021928	1000
AGT-Genome wide association study ATLAS.csv	1095	21909115	2011	Cardiovascular	Diastolic Blood Pressure	0.00024235	69395
AGT-Genome wide association study ATLAS.csv	3693	31427789	2019	Cardiovascular	Diagnoses - secondary ICD10: I25 Chronic ischemic heart disease	0.00026259	244890
AGT-Genome wide association study ATLAS.csv	943	27005778	2016	Metabolic	Phospholipids in small VLDL	0.0002779	21551
AGT-Genome wide association study ATLAS.csv	3051	28240269	2017	Cell	EPHB2 - Ephrin type-B receptor 2	0.00029799	1000
AGT-Genome wide association study ATLAS.csv	941	27005778	2016	Metabolic	Total lipids in small VLDL	0.00030555	19273
AGT-Genome wide association study ATLAS.csv	942	27005778	2016	Metabolic	Concentration of small VLDL particles	0.00032072	19273
AGT-Genome wide association study ATLAS.csv	2009	23505323	2013	Metabolic	Hypertriglyceridemia	0.00039751	2240
AGT-Genome wide association study ATLAS.csv	968	27005778	2016	Metabolic	Triglycerides in very small VLDL	0.0004395	19273
AGT-Genome wide association study ATLAS.csv	4346	30525989	2018	Cardiovascular	Coronary artery disease and triglyceride (bivariate)	0.00046401	735838
AGT-Genome wide association study ATLAS.csv	1097	21909110	2011	Cardiovascular	Mean Arterial Pressure	0.00055675	69395
AGT-Genome wide association study ATLAS.csv	2453	28240269	2017	Cell	MATN2 - Matrilin-2	0.00056953	1000
AGT-Genome wide association study ATLAS.csv	4142	29403010	2018	Cardiovascular	Systolic Blood Pressure	0.00057277	136597
AGT-Genome wide association study ATLAS.csv	3651	31427789	2019	Environment	Illnesses of siblings: High blood pressure	0.00065761	309116
AGT-Genome wide association study ATLAS.csv	3023	28240269	2017	Cell	PRDX6 - Peroxiredoxin-6	0.00079743	1000
AGT-Genome wide association study ATLAS.csv	4172	29970889	2018	Social Interactions	Social support - Leisure/social activities: Pub or social club	0.00080578	452302
AGT-Genome wide association study ATLAS.csv	2940	28240269	2017	Cell	GDF2 - Growth/differentiation factor 2	0.00090247	1000
AGT-Genome wide association study ATLAS.csv	4348	30525989	2018	Cardiovascular	Coronary artery disease and high-density lipoprotein cholesterol (bivariate)	0.00090912	735838
AGT-Genome wide association study ATLAS.csv	944	27005778	2016	Metabolic	Triglycerides in small VLDL	0.001056	21558
AGT-Genome wide association study ATLAS.csv	940	27005778	2016	Metabolic	Free cholesterol in small VLDL	0.0010868	21559
AGT-Genome wide association study ATLAS.csv	3614	31427789	2019	Activities	Treatment/medication code: ventolin 100micrograms inhaler	0.0012753	280443
AGT-Genome wide association study ATLAS.csv	3633	31427789	2019	Environment	Illnesses of father: High blood pressure	0.0013592	355137
AGT-Genome wide association study ATLAS.csv	3279	31427789	2019	Mortality	Father's age at death	0.0014134	283990
AGT-Genome wide association study ATLAS.csv	4145	29403010	2018	Cardiovascular	Pulse pressure	0.0014834	136249
AGT-Genome wide association study ATLAS.csv	925	27005778	2016	Metabolic	Concentration of medium VLDL particles	0.001594	19273
AGT-Genome wide association study ATLAS.csv	891	27005778	2016	Metabolic	Phospholipids in large HDL	0.0016471	19273
AGT-Genome wide association study ATLAS.csv	2614	28240269	2017	Cell	DKKL1 - Dickkopf-like protein 1	0.0016514	1000
AGT-Genome wide association study ATLAS.csv	3242	31427789	2019	Nutritional	Fresh fruit intake	0.0016927	372901
AGT-Genome wide association study ATLAS.csv	935	27005778	2016	Metabolic	Triglycerides in small HDL	0.0017241	21558
AGT-Genome wide association study ATLAS.csv	3125	28240269	2017	Cell	PDE11A - Dual 3',5'-cyclic-AMP and -GMP phosphodiesterase 11A	0.0017581	1000
AGT-Genome wide association study ATLAS.csv	4144	29403010	2018	Cardiovascular	Mean arterial pressure	0.0019267	136482
AGT-Genome wide association study ATLAS.csv	4225	31015401	2019	Environmental	HMG CoA reductase inhibitors	0.0019909	290385
AGT-Genome wide association study ATLAS.csv	4347	30525989	2018	Cardiovascular	Coronary artery disease and low-density lipoprotein cholesterol (bivariate)	0.0020724	735838
AGT-Genome wide association study ATLAS.csv	3792	30804565	2019	Psychiatric	Daytime napping	0.0021843	386577
AGT-Genome wide association study ATLAS.csv	2143	28240269	2017	Cell	PLAUR - Urokinase plasminogen activator surface receptor	0.0023386	1000
AGT-Genome wide association study ATLAS.csv	4726	BioRxiv: https://doi.org/10.1101/288634	2019	Neurological	Posterior limb of internal capsule mode of anisotropy	0.0023464	17706
AGT-Genome wide association study ATLAS.csv	3079	28240269	2017	Cell	NRCAM - Neuronal cell adhesion molecule	0.0024191	1000
AGT-Genome wide association study ATLAS.csv	3421	31427789	2019	Cognitive	Pairs matching test - Time to complete round	0.0025184	93074
AGT-Genome wide association study ATLAS.csv	966	27005778	2016	Metabolic	Concentration of very small VLDL particles	0.0025603	19273
AGT-Genome wide association study ATLAS.csv	2651	28240269	2017	Cell	TEK - Angiopoietin-1 receptor, soluble	0.0026031	1000
AGT-Genome wide association study ATLAS.csv	965	27005778	2016	Metabolic	Total lipids in very small VLDL	0.0026263	19273
AGT-Genome wide association study ATLAS.csv	890	27005778	2016	Metabolic	Concentration of large HDL particles	0.0026592	19273
AGT-Genome wide association study ATLAS.csv	2120	28240269	2017	Cell	ERBB4 - Receptor tyrosine-protein kinase erbB-4	0.0027016	1000
AGT-Genome wide association study ATLAS.csv	889	27005778	2016	Metabolic	Total lipids in large HDL	0.0027087	19273
AGT-Genome wide association study ATLAS.csv	4345	30525989	2018	Cardiovascular	Coronary artery disease and total cholesterol (bivariate)	0.0028366	735838
AGT-Genome wide association study ATLAS.csv	2579	28240269	2017	Cell	BSG - Basigin	0.0028532	1000
AGT-Genome wide association study ATLAS.csv	3190	31427789	2019	Mortality	Number of self-reported non-cancer illnesses	0.0029222	386581
AGT-Genome wide association study ATLAS.csv	5	21926972	2011	Psychiatric	Bipolar disorder	0.0031844	16731
AGT-Genome wide association study ATLAS.csv	884	27005778	2016	Metabolic	Triglycerides in IDL	0.0033657	19273
AGT-Genome wide association study ATLAS.csv	109	21378990	2011	Cardiovascular	Coronary artery disease	0.0034428	86995
AGT-Genome wide association study ATLAS.csv	3620	31427789	2019	Activities	Treatment/medication code: amlodipine	0.0034903	280443
AGT-Genome wide association study ATLAS.csv	2211	28240269	2017	Cell	PPBP - Neutrophil-activating peptide 2	0.0035635	1000
AGT-Genome wide association study ATLAS.csv	458	24816252	2014	Metabolic	Energy::Krebs cycle::alpha-ketoglutarate	0.0035856	6130
AGT-Genome wide association study ATLAS.csv	3121	28240269	2017	Cell	PDE2A - cGMP-dependent 3',5'-cyclic phosphodiesterase	0.0036997	1000
AGT-Genome wide association study ATLAS.csv	3003	28240269	2017	Cell	HPGD - 15-hydroxyprostaglandin dehydrogenase [NAD(+)]	0.0038009	1000
AGT-Genome wide association study ATLAS.csv	2169	28240269	2017	Cell	CNTFR - Ciliary neurotrophic factor receptor subunit alpha	0.0038485	1000
AGT-Genome wide association study ATLAS.csv	1217	27911795	2016	Psychiatric	Alcohol consumption (dichotomous, male)	0.0039013	26991
AGT-Genome wide association study ATLAS.csv	3336	31427789	2019	Activities	Ever had breast cancer screening / mammogram (female)	0.0039108	208314
AGT-Genome wide association study ATLAS.csv	3153	28240269	2017	Cell	HNRNPA2B1 - Heterogeneous nuclear ribonucleoproteins A2/B1	0.0039205	1000
AGT-Genome wide association study ATLAS.csv	887	27005778	2016	Metabolic	Cholesterol esters in large HDL	0.0039335	19273
AGT-Genome wide association study ATLAS.csv	3577	31427789	2019	Social Interactions	Social support - Leisure/social activities: Pub or social club	0.0039494	385280
AGT-Genome wide association study ATLAS.csv	2694	28240269	2017	Cell	PSMA1 - Proteasome subunit alpha type-1	0.0039609	1000
AGT-Genome wide association study ATLAS.csv	3879	27863252	2016	Immunological	Hematocrit (three-way meta)	0.003963	173039
AGT-Genome wide association study ATLAS.csv	886	27005778	2016	Metabolic	Total cholesterol in large HDL	0.0040559	21558
AGT-Genome wide association study ATLAS.csv	4143	29403010	2018	Cardiovascular	Diastolic Blood Pressure	0.0041371	136615
AGT-Genome wide association study ATLAS.csv	2122	28240269	2017	Cell	IL6ST - Interleukin-6 receptor subunit beta	0.0042156	1000
AGT-Genome wide association study ATLAS.csv	239	25772697	2015	Immunological	CD24 on IgA+ B	0.0043984	669
AGT-Genome wide association study ATLAS.csv	2878	28240269	2017	Cell	PPBP - Connective tissue-activating peptide III	0.0044347	1000
AGT-Genome wide association study ATLAS.csv	939	27005778	2016	Metabolic	Total cholesterol in small VLDL	0.0044515	21557
AGT-Genome wide association study ATLAS.csv	270	25772697	2015	Immunological	CD4:%Naive	0.0044637	669
AGT-Genome wide association study ATLAS.csv	233	25772697	2015	Immunological	Lymph:%T	0.0045739	669
AGT-Genome wide association study ATLAS.csv	3479	31427789	2019	Activities	Own or rent accommodation lived in: Rent - from private landlord or letting agency	0.0046244	383032
AGT-Genome wide association study ATLAS.csv	2973	28240269	2017	Cell	AGR2 - Anterior gradient protein 2 homolog	0.0047999	1000
AGT-Genome wide association study ATLAS.csv	2222	28240269	2017	Cell	CDH5 - Cadherin-5	0.0052635	1000
AGT-Genome wide association study ATLAS.csv	2804	28240269	2017	Cell	SPON1 - Spondin-1	0.005368	1000
AGT-Genome wide association study ATLAS.csv	3271	31427789	2019	Skeletal	Comparative height size at age 10	0.005385	380167
AGT-Genome wide association study ATLAS.csv	2360	28240269	2017	Cell	IL18BP - Interleukin-18-binding protein	0.0054139	1000
AGT-Genome wide association study ATLAS.csv	2073	28240269	2017	Cell	FGFR1 - Fibroblast growth factor receptor 1	0.0054233	1000
AGT-Genome wide association study ATLAS.csv	3900	27863252	2016	Immunological	Red blood cell count (three-way meta)	0.0054599	172952
AGT-Genome wide association study ATLAS.csv	3090	28240269	2017	Cell	SIGLEC14 - Sialic acid-binding Ig-like lectin 14	0.0055725	1000
AGT-Genome wide association study ATLAS.csv	2487	28240269	2017	Cell	PRKCI - Protein kinase C iota type	0.0057807	1000
AGT-Genome wide association study ATLAS.csv	3386	31427789	2019	Activities	Work/job satisfaction	0.0058086	128621
AGT-Genome wide association study ATLAS.csv	2451	28240269	2017	Cell	LRP8 - Low-density lipoprotein receptor-related protein 8	0.005851	1000
AGT-Genome wide association study ATLAS.csv	1094	21909115	2011	Cardiovascular	Systolic Blood Pressure	0.005877	69395
AGT-Genome wide association study ATLAS.csv	946	27005778	2016	Metabolic	Serum total triglycerides	0.0058822	21545
AGT-Genome wide association study ATLAS.csv	2117	28240269	2017	Cell	EFNA5 - Ephrin-A5	0.0059288	1000
AGT-Genome wide association study ATLAS.csv	2114	28240269	2017	Cell	TYRO3 - Tyrosine-protein kinase receptor TYRO3	0.0059952	1000
AGT-Genome wide association study ATLAS.csv	3081	28240269	2017	Cell	NRXN3 - Neurexin-3-beta	0.0061005	1000
AGT-Genome wide association study ATLAS.csv	2912	28240269	2017	Cell	TFF3 - Trefoil factor 3	0.0061852	1000
AGT-Genome wide association study ATLAS.csv	855	27005778	2016	Metabolic	ApoB	0.006238	20690
AGT-Genome wide association study ATLAS.csv	2577	28240269	2017	Cell	AHSG - Alpha-2-HS-glycoprotein	0.0063371	1000
AGT-Genome wide association study ATLAS.csv	4232	31015401	2019	Environmental	Anilides	0.0063604	179810
AGT-Genome wide association study ATLAS.csv	2762	28240269	2017	Cell	MMP2 - 72 kDa type IV collagenase	0.0064694	1000
AGT-Genome wide association study ATLAS.csv	4043	30124842	2018	Skeletal	Height	0.0069193	693529
AGT-Genome wide association study ATLAS.csv	367	24816252	2014	Metabolic	Amino acid::Alanine and aspartate metabolism::N-acetylalanine	0.0076432	7720
AGT-Genome wide association study ATLAS.csv	876	27005778	2016	Metabolic	Total cholesterol in HDL	0.0077979	21555
AGT-Genome wide association study ATLAS.csv	3809	19853236	2009	Immunological	Monocyte count	0.0078178	4225
AGT-Genome wide association study ATLAS.csv	3159	28240269	2017	Cell	OMD - Osteomodulin	0.0081925	1000
AGT-Genome wide association study ATLAS.csv	3843	27863252	2016	Immunological	Hematocrit (two-way meta)	0.008422	132699
AGT-Genome wide association study ATLAS.csv	4450	31676860	2019	Neurological	Left inferior parietal	0.0085685	19629
AGT-Genome wide association study ATLAS.csv	2542	28240269	2017	Cell	THBS1 - Thrombospondin-1	0.0085882	1000
AGT-Genome wide association study ATLAS.csv	1063	17728769	2007	Psychiatric	Schizophrenia	0.008675	2729
AGT-Genome wide association study ATLAS.csv	1089	22978509	2012	Psychiatric	Alcohol dependence	0.0089829	1161
AGT-Genome wide association study ATLAS.csv	3628	31427789	2019	Environment	Illnesses of father: Heart disease	0.0090266	355137
AGT-Genome wide association study ATLAS.csv	2121	28240269	2017	Cell	TACSTD2 - Tumor-associated calcium signal transducer 2	0.0090313	1000
AGT-Genome wide association study ATLAS.csv	3150	28240269	2017	Cell	CPNE1 - Copine-1	0.0091603	1000
AGT-Genome wide association study ATLAS.csv	1103	19060910	2009	Metabolic	Insulin - Birth cohorts	0.009174	4763
AGT-Genome wide association study ATLAS.csv	888	27005778	2016	Metabolic	Free cholesterol in large HDL	0.0092145	21559
AGT-Genome wide association study ATLAS.csv	3080	28240269	2017	Cell	NRXN1 - Neurexin-1-beta	0.0092833	1000
AGT-Genome wide association study ATLAS.csv	3105	28240269	2017	Cell	PDE9A - High affinity cGMP-specific 3',5'-cyclic phosphodiesterase 9A	0.0096921	1000
AGT-Genome wide association study ATLAS.csv	4362	29899525	2018	Activities	Acceleration average	0.0098641	91084
AGT-Genome wide association study ATLAS.csv	2734	28240269	2017	Cell	FGF6 - Fibroblast growth factor 6	0.009892	1000
AGT-Genome wide association study ATLAS.csv	3046	28240269	2017	Cell	CD55 - Complement decay-accelerating factor	0.010207	1000
AGT-Genome wide association study ATLAS.csv	919	27005778	2016	Metabolic	Concentration of medium LDL particles	0.010225	19273
AGT-Genome wide association study ATLAS.csv	2227	28240269	2017	Cell	SPINT1 - Kunitz-type protease inhibitor 1	0.010416	1000
AGT-Genome wide association study ATLAS.csv	3077	28240269	2017	Cell	NOTCH1 - Neurogenic locus notch homolog protein 1	0.0108	1000
AGT-Genome wide association study ATLAS.csv	3063	28240269	2017	Cell	JAG1 - Protein jagged-1	0.010873	1000
AGT-Genome wide association study ATLAS.csv	497	24816252	2014	Metabolic	Lipid::Fatty acid, dicarboxylate::2-hydroxyglutarate	0.011363	6287
AGT-Genome wide association study ATLAS.csv	434	24816252	2014	Metabolic	Carbohydrate::Aminosugars metabolism::erythronate*	0.011383	7752
AGT-Genome wide association study ATLAS.csv	4335	30531941	2018	Activities	Overall activity	0.011576	91105
AGT-Genome wide association study ATLAS.csv	2800	28240269	2017	Cell	RAN - GTP-binding nuclear protein Ran	0.011816	1000
AGT-Genome wide association study ATLAS.csv	3299	31427789	2019	Psychiatric	Frequency of tenseness / restlessness in last 2 weeks	0.011904	371869
AGT-Genome wide association study ATLAS.csv	1091	22978509	2012	Psychiatric	Alcohol dependence	0.011919	3829
AGT-Genome wide association study ATLAS.csv	3612	31427789	2019	Activities	Treatment/medication code: ramipril	0.011919	280443
AGT-Genome wide association study ATLAS.csv	100	23449627	2013	Skeletal	Pubertal growth (male)	0.012017	5043
AGT-Genome wide association study ATLAS.csv	3844	27863252	2016	Immunological	Hemoglobin concentration (two-way meta)	0.012129	132596
AGT-Genome wide association study ATLAS.csv	918	27005778	2016	Metabolic	Total lipids in medium LDL	0.012222	19273
AGT-Genome wide association study ATLAS.csv	284	25772697	2015	Immunological	CD4:%Act(38+)	0.012278	669
AGT-Genome wide association study ATLAS.csv	2515	28240269	2017	Cell	CSNK2A1 - Casein kinase II subunit alpha	0.01248	1000
AGT-Genome wide association study ATLAS.csv	3656	31427789	2019	Psychiatric	Alcohol - Alcohol drinker status: Never	0.012565	386082
AGT-Genome wide association study ATLAS.csv	2288	28240269	2017	Cell	PROC - Vitamin K-dependent protein C	0.012647	1000
AGT-Genome wide association study ATLAS.csv	3370	31427789	2019	Activities	Duration of other exercises	0.013096	184806
AGT-Genome wide association study ATLAS.csv	3314	31427789	2019	Ear, Nose, Throat	Hearing difficulty/problems with background noise	0.013127	378722
AGT-Genome wide association study ATLAS.csv	4254	30952852	2019	Psychiatric	Sleep duration (SD)	0.013387	84441
AGT-Genome wide association study ATLAS.csv	746	24816252	2014	Metabolic	::::X-12013	0.013454	1948
AGT-Genome wide association study ATLAS.csv	3688	31427789	2019	Metabolic	Diagnoses - secondary ICD10: E78 Disorders of lipoprotein metabolism and other lipidemias	0.01349	244890
AGT-Genome wide association study ATLAS.csv	2105	28240269	2017	Cell	ROR1 - Tyrosine-protein kinase transmembrane receptor ROR1	0.01376	1000
AGT-Genome wide association study ATLAS.csv	924	27005778	2016	Metabolic	Total lipids in medium VLDL	0.013798	19273
AGT-Genome wide association study ATLAS.csv	3180	28240269	2017	Cell	STIP1 - Stress-induced-phosphoprotein 1	0.013822	1000
AGT-Genome wide association study ATLAS.csv	586	24816252	2014	Metabolic	Nucleotide::Purine metabolism, guanine containing::N2,N2-dimethylguanosine	0.013842	5228
AGT-Genome wide association study ATLAS.csv	3103	28240269	2017	Cell	KRAS - GTPase KRas	0.013846	1000
AGT-Genome wide association study ATLAS.csv	3241	31427789	2019	Nutritional	Salad / raw vegetable intake	0.014424	363780
AGT-Genome wide association study ATLAS.csv	877	27005778	2016	Metabolic	HDL diameter	0.014485	19273
AGT-Genome wide association study ATLAS.csv	3415	31427789	2019	Cognitive	Reaction time test - Mean time to correctly identify matches	0.014819	383748
AGT-Genome wide association study ATLAS.csv	1086	22523087	2012	Neoplasms	Pancreatic cancer	0.014981	7785
AGT-Genome wide association study ATLAS.csv	4336	30531941	2018	Activities	Overall activity (conditioning sex and BMI)	0.015019	91105
AGT-Genome wide association study ATLAS.csv	2517	28240269	2017	Cell	EPHA3 - Ephrin type-A receptor 3	0.015083	1000
AGT-Genome wide association study ATLAS.csv	936	27005778	2016	Metabolic	Total cholesterol in small LDL	0.015133	21556
AGT-Genome wide association study ATLAS.csv	2620	28240269	2017	Cell	PPP3R1 - Calcineurin subunit B type 1	0.015496	1000
AGT-Genome wide association study ATLAS.csv	213	25772697	2015	Immunological	Lymph:%CD4	0.015601	669
AGT-Genome wide association study ATLAS.csv	938	27005778	2016	Metabolic	Concentration of small LDL particles	0.015841	19273
AGT-Genome wide association study ATLAS.csv	2659	28240269	2017	Cell	CST5 - Cystatin-D	0.015978	1000
AGT-Genome wide association study ATLAS.csv	920	27005778	2016	Metabolic	Phospholipids in medium LDL	0.016038	21558
AGT-Genome wide association study ATLAS.csv	381	24816252	2014	Metabolic	Amino acid::Glycine, serine and threonine metabolism::N-acetylglycine	0.01604	7135
AGT-Genome wide association study ATLAS.csv	2258	28240269	2017	Cell	UBE2I - SUMO-conjugating enzyme UBC9	0.016097	1000
AGT-Genome wide association study ATLAS.csv	2221	28240269	2017	Cell	BCAM - Basal Cell Adhesion Molecule	0.016228	1000
AGT-Genome wide association study ATLAS.csv	3747	31427789	2019	Psychiatric	Happiness and subjective well-being - Belief that own life is meaningfull	0.016607	123818
AGT-Genome wide association study ATLAS.csv	3581	31427789	2019	Activities	Types of transport used (excluding work): Car/motor vehicle	0.01689	384551
AGT-Genome wide association study ATLAS.csv	917	27005778	2016	Metabolic	Cholesterol esters in medium LDL	0.016999	19273
AGT-Genome wide association study ATLAS.csv	2572	28240269	2017	Cell	CD40LG - CD40 ligand	0.017141	1000
AGT-Genome wide association study ATLAS.csv	3231	31427789	2019	Psychiatric	Nap during day	0.017224	386124
AGT-Genome wide association study ATLAS.csv	470	24816252	2014	Metabolic	Lipid::Bile acid metabolism::taurochenodeoxycholate	0.017335	5716
AGT-Genome wide association study ATLAS.csv	2242	28240269	2017	Cell	AIF1 - Allograft inflammatory factor 1	0.017443	1000
AGT-Genome wide association study ATLAS.csv	4170	29970889	2018	Psychiatric	Loneliness (MTAG)	0.017522	487647
AGT-Genome wide association study ATLAS.csv	3188	31427789	2019	Cardiovascular	Pulse rate (automated reading)	0.018006	361411
AGT-Genome wide association study ATLAS.csv	4274	30846698	2019	Psychiatric	Short sleep	0.018236	411934
AGT-Genome wide association study ATLAS.csv	2219	28240269	2017	Cell	ANGPT1 - Angiopoietin-1	0.018318	1000
AGT-Genome wide association study ATLAS.csv	4462	31676860	2019	Neurological	Left pars triangularis	0.018441	19629
AGT-Genome wide association study ATLAS.csv	4357	30220432	2018	Metabolic	Albuminuria	0.018592	382500
AGT-Genome wide association study ATLAS.csv	3044	28240269	2017	Cell	CD300C - CMRF35-like molecule 6	0.018652	1000
AGT-Genome wide association study ATLAS.csv	2592	28240269	2017	Cell	DKK3 - Dickkopf-related protein 3	0.018826	1000
AGT-Genome wide association study ATLAS.csv	3353	31427789	2019	Psychiatric	Number of cigarettes previously smoked daily	0.01888	90143
AGT-Genome wide association study ATLAS.csv	2251	28240269	2017	Cell	MAP2K1 - Dual specificity mitogen-activated protein kinase kinase 1	0.01894	1000
AGT-Genome wide association study ATLAS.csv	2163	28240269	2017	Cell	PF4 - Platelet factor 4	0.01915	1000
AGT-Genome wide association study ATLAS.csv	2305	28240269	2017	Cell	CXCL3 CXCL2 - Gro-beta/gamma	0.019178	1000
AGT-Genome wide association study ATLAS.csv	10	23974872	2013	Psychiatric	Schizophrenia	0.019375	32143
AGT-Genome wide association study ATLAS.csv	910	27005778	2016	Metabolic	Total cholesterol in medium HDL	0.019424	21558
AGT-Genome wide association study ATLAS.csv	3783	31427789	2019	Psychiatric	Depression - Waking too early	0.01955	48926
AGT-Genome wide association study ATLAS.csv	111	23202125	2013	Cardiovascular	Coronary artery disease	0.019889	194427
AGT-Genome wide association study ATLAS.csv	3285	31427789	2019	Psychiatric	Miserableness	0.019946	379907
AGT-Genome wide association study ATLAS.csv	4551	31676860	2019	Neurological	Left inferior parietal	0.020057	21821
AGT-Genome wide association study ATLAS.csv	3992	29500382	2018	Psychiatric	Miserableness (MIS)	0.020179	267050
AGT-Genome wide association study ATLAS.csv	3109	28240269	2017	Cell	CSNK2A1 CSNK2B - Casein kinase II 2-alpha:2-beta heterotetramer	0.020328	1000
AGT-Genome wide association study ATLAS.csv	3343	31427789	2019	Reproduction	Age at first live birth (female)	0.020414	141051
AGT-Genome wide association study ATLAS.csv	4474	31676860	2019	Neurological	Left transverse temporal	0.02065	19629
AGT-Genome wide association study ATLAS.csv	3635	31427789	2019	Environment	Illnesses of father: Alzheimer's disease/dementia	0.020835	355137
AGT-Genome wide association study ATLAS.csv	2751	28240269	2017	Cell	PDGFB - Platelet-derived growth factor subunit B	0.020989	1000
AGT-Genome wide association study ATLAS.csv	2337	28240269	2017	Cell	MRC2 - C-type mannose receptor 2	0.020991	1000
AGT-Genome wide association study ATLAS.csv	53	27225129	2016	Environment	Educational attainment	0.021258	328917
AGT-Genome wide association study ATLAS.csv	896	27005778	2016	Metabolic	Concentration of large LDL particles	0.021262	19273
AGT-Genome wide association study ATLAS.csv	2600	28240269	2017	Cell	LGMN - Legumain	0.021312	1000
AGT-Genome wide association study ATLAS.csv	4550	31676860	2019	Neurological	Left fusiform	0.021345	21821
AGT-Genome wide association study ATLAS.csv	848	24816252	2014	Metabolic	Xenobiotics::Food component/Plant::X-14977--vanillin	0.02142	1789
AGT-Genome wide association study ATLAS.csv	1216	27911795	2016	Psychiatric	Alcohol consumption (dichotomous)	0.021442	74711
AGT-Genome wide association study ATLAS.csv	882	27005778	2016	Metabolic	Concentration of IDL particles	0.021458	19273
AGT-Genome wide association study ATLAS.csv	2906	28240269	2017	Cell	EPB41 - Protein 4.1	0.021496	1000
AGT-Genome wide association study ATLAS.csv	3668	31427789	2019	Cardiovascular	Diagnoses - main ICD10: I25 Chronic ischemic heart disease	0.021595	300791
AGT-Genome wide association study ATLAS.csv	2810	28240269	2017	Cell	PTPN6 - Tyrosine-protein phosphatase non-receptor type 6	0.021901	1000
AGT-Genome wide association study ATLAS.csv	2595	28240269	2017	Cell	EPHB4 - Ephrin type-B receptor 4	0.022003	1000
AGT-Genome wide association study ATLAS.csv	3880	27863252	2016	Immunological	Hemoglobin concentration (three-way meta)	0.022075	172925
AGT-Genome wide association study ATLAS.csv	4228	31015401	2019	Environmental	Anti-inflammatory and antirheumatic products, non-steroids	0.022175	164520
AGT-Genome wide association study ATLAS.csv	4721	BioRxiv: https://doi.org/10.1101/288629	2019	Neurological	Fornix (column and body of fornix) mode of anisotropy	0.022198	17706
AGT-Genome wide association study ATLAS.csv	3167	28240269	2017	Cell	CDH15 - Cadherin-15	0.022381	1000
AGT-Genome wide association study ATLAS.csv	2266	28240269	2017	Cell	IL4 - Interleukin-4	0.022414	1000
AGT-Genome wide association study ATLAS.csv	4486	31676860	2019	Neurological	Right lingual	0.022613	19629
AGT-Genome wide association study ATLAS.csv	4066	30038396	2018	Environment	Educational attainment	0.023015	766345
AGT-Genome wide association study ATLAS.csv	2448	28240269	2017	Cell	IGFBP7 - Insulin-like growth factor-binding protein 7	0.023117	1000
AGT-Genome wide association study ATLAS.csv	2026	22952603	2012	Psychiatric	Baseline positive affect factor score	0.023124	381
AGT-Genome wide association study ATLAS.csv	2031	28067908	2017	Gastrointestinal	Inflammatory Bowel Disease	0.02314	59957
AGT-Genome wide association study ATLAS.csv	3676	31427789	2019	Skeletal	Diagnoses - main ICD10: M16 Osteoarthritis of hip	0.023499	300791
AGT-Genome wide association study ATLAS.csv	2646	28240269	2017	Cell	IL5 - Interleukin-5	0.023698	1000
AGT-Genome wide association study ATLAS.csv	2896	28240269	2017	Cell	SLITRK5 - SLIT and NTRK-like protein 5	0.023702	1000
AGT-Genome wide association study ATLAS.csv	3052	28240269	2017	Cell	EPHB6 - Ephrin type-B receptor 6	0.023738	1000
AGT-Genome wide association study ATLAS.csv	311	25772697	2015	Immunological	CD4nv:%R6+R4-	0.023866	669
AGT-Genome wide association study ATLAS.csv	553	24816252	2014	Metabolic	Lipid::Medium chain fatty acid::10-undecenoate (11:1n1)	0.02397	7806
AGT-Genome wide association study ATLAS.csv	3535	31427789	2019	Environment	Mental health - Illness, injury, bereavement, stress in last 2 years: Marital separation/divorce	0.024197	383913
AGT-Genome wide association study ATLAS.csv	1203	24390342	2014	Connective Tissue	Rheumatoid Arthritis	0.02454	58284
AGT-Genome wide association study ATLAS.csv	2304	28240269	2017	Cell	CXCL1 - Growth-regulated alpha protein	0.024598	1000
AGT-Genome wide association study ATLAS.csv	895	27005778	2016	Metabolic	Total lipids in large LDL	0.024703	19273
AGT-Genome wide association study ATLAS.csv	2641	28240269	2017	Cell	TNFRSF4 - Tumor necrosis factor receptor superfamily member 4	0.024703	1000
AGT-Genome wide association study ATLAS.csv	2582	28240269	2017	Cell	CDH6 - Cadherin-6	0.024719	1000
AGT-Genome wide association study ATLAS.csv	3510	31427789	2019	Psychiatric	Reason for reducing amount of alcohol drunk: Health precaution	0.024844	142645
AGT-Genome wide association study ATLAS.csv	4171	29970889	2018	Psychiatric	Loneliness	0.024911	445024
AGT-Genome wide association study ATLAS.csv	2093	28240269	2017	Cell	CCL5 - C-C motif chemokine 5	0.024967	1000
AGT-Genome wide association study ATLAS.csv	2845	28240269	2017	Cell	MFGE8 - Lactadherin	0.025313	1000
AGT-Genome wide association study ATLAS.csv	3084	28240269	2017	Cell	RELT - Tumor necrosis factor receptor superfamily member 19L	0.025914	1000
AGT-Genome wide association study ATLAS.csv	959	27005778	2016	Metabolic	Phospholipids in very large HDL	0.025982	19273
AGT-Genome wide association study ATLAS.csv	702	24816252	2014	Metabolic	::::X-11438	0.026069	7084
AGT-Genome wide association study ATLAS.csv	218	25772697	2015	Immunological	T:%NKT	0.026085	669
AGT-Genome wide association study ATLAS.csv	893	27005778	2016	Metabolic	Cholesterol esters in large LDL	0.026117	19273
AGT-Genome wide association study ATLAS.csv	881	27005778	2016	Metabolic	Total lipids in IDL	0.02638	19273
AGT-Genome wide association study ATLAS.csv	1076	19648918	2009	Neoplasms	Pancreatic cancer	0.026395	3835
AGT-Genome wide association study ATLAS.csv	3332	31427789	2019	Activities	Taking other prescription medications	0.026456	385236
AGT-Genome wide association study ATLAS.csv	3148	28240269	2017	Cell	CPE - Carboxypeptidase E	0.026736	1000
AGT-Genome wide association study ATLAS.csv	3181	28240269	2017	Cell	SPOCK1 - Testican-1	0.026834	1000
AGT-Genome wide association study ATLAS.csv	2478	28240269	2017	Cell	CSK - Tyrosine-protein kinase CSK	0.026866	1000
AGT-Genome wide association study ATLAS.csv	2802	28240269	2017	Cell	NAPA - Alpha-soluble NSF attachment protein	0.027454	1000
AGT-Genome wide association study ATLAS.csv	937	27005778	2016	Metabolic	Total lipids in small LDL	0.027523	19273
AGT-Genome wide association study ATLAS.csv	107	24770850	2014	Reproduction	Tanner scale	0.027569	9916
AGT-Genome wide association study ATLAS.csv	1199	25087078	2014	Neurological	Epilepsy	0.027686	34853
AGT-Genome wide association study ATLAS.csv	2690	28240269	2017	Cell	MDH1 - Malate dehydrogenase, cytoplasmic	0.02771	1000
AGT-Genome wide association study ATLAS.csv	967	27005778	2016	Metabolic	Phospholipids in very small VLDL	0.027739	19273
AGT-Genome wide association study ATLAS.csv	4360	30102696	2018	Gastrointestinal	Biliary atresia	0.027786	2427
AGT-Genome wide association study ATLAS.csv	3410	31427789	2019	Mortality	Interpolated Year when non-cancer illness first diagnosed	0.027987	277734
AGT-Genome wide association study ATLAS.csv	4358	30177863	2018	Gastrointestinal	Diverticular disease	0.028021	409728
AGT-Genome wide association study ATLAS.csv	1096	21909110	2011	Cardiovascular	Pulse pressure	0.028345	69395
AGT-Genome wide association study ATLAS.csv	2947	28240269	2017	Cell	PPP3CA PPP3R1 - Calcineurin	0.028372	1000
AGT-Genome wide association study ATLAS.csv	3240	31427789	2019	Nutritional	Cooked vegetable intake	0.028455	374858
AGT-Genome wide association study ATLAS.csv	2494	28240269	2017	Cell	AKT1 AKT2 AKT3 - Protein kinase B alpha/beta/gamma	0.028464	1000
AGT-Genome wide association study ATLAS.csv	4576	31676860	2019	Neurological	Left insula	0.028464	21821
AGT-Genome wide association study ATLAS.csv	3618	31427789	2019	Activities	Treatment/medication code: aspirin	0.028565	280443
AGT-Genome wide association study ATLAS.csv	2379	28240269	2017	Cell	APP - Amyloid beta A4 protein	0.028566	1000
AGT-Genome wide association study ATLAS.csv	2100	28240269	2017	Cell	LEP - Leptin	0.028853	1000
AGT-Genome wide association study ATLAS.csv	3528	31427789	2019	Nutritional	Never eat eggs, dairy, wheat, sugar: Eggs or foods containing eggs	0.029225	384986
AGT-Genome wide association study ATLAS.csv	729	24816252	2014	Metabolic	Cofactors and vitamins::Hemoglobin and porphyrin metabolism::X-11793--oxidized bilirubin*	0.029348	7611
AGT-Genome wide association study ATLAS.csv	3411	31427789	2019	Mortality	Interpolated Age of participant when non-cancer illness first diagnosed	0.029523	277734
AGT-Genome wide association study ATLAS.csv	2438	28240269	2017	Cell	CST6 - Cystatin-M	0.029748	1000
AGT-Genome wide association study ATLAS.csv	2096	28240269	2017	Cell	POMC - Beta-endorphin	0.029897	1000
AGT-Genome wide association study ATLAS.csv	4377	30940143	2019	Cardiovascular	Resting heart rate	0.03009	458969
AGT-Genome wide association study ATLAS.csv	3522	31427789	2019	Environment	Current employment status: Unable to work because of sickness or disability	0.030145	385138
AGT-Genome wide association study ATLAS.csv	2341	28240269	2017	Cell	PTN - Pleiotrophin	0.030483	1000
AGT-Genome wide association study ATLAS.csv	4418	30053915	2018	Immunological	Mumps seropositivity	0.030566	1000
AGT-Genome wide association study ATLAS.csv	2587	28240269	2017	Cell	CHL1 - Neural cell adhesion molecule L1-like protein	0.030729	1000
AGT-Genome wide association study ATLAS.csv	3175	28240269	2017	Cell	IL17RC - Interleukin-17 receptor C	0.030923	1000
AGT-Genome wide association study ATLAS.csv	2231	28240269	2017	Cell	KLK8 - Kallikrein-8	0.031192	1000
AGT-Genome wide association study ATLAS.csv	2535	28240269	2017	Cell	BCAN - Brevican core protein	0.031277	1000
AGT-Genome wide association study ATLAS.csv	3537	31427789	2019	Environment	Attendance/disability/mobility allowance: Disability living allowance	0.031406	383632
AGT-Genome wide association study ATLAS.csv	922	27005778	2016	Metabolic	Cholesterol esters in medium VLDL	0.031622	19273
AGT-Genome wide association study ATLAS.csv	3099	28240269	2017	Cell	UNC5C - Netrin receptor UNC5C	0.032211	1000
AGT-Genome wide association study ATLAS.csv	4575	31676860	2019	Neurological	Left transverse temporal	0.032342	21821
AGT-Genome wide association study ATLAS.csv	4414	30053915	2018	Cell	Total IgA levels	0.032443	1000
AGT-Genome wide association study ATLAS.csv	2808	28240269	2017	Cell	TPI1 - Triosephosphate isomerase	0.032738	1000
AGT-Genome wide association study ATLAS.csv	921	27005778	2016	Metabolic	Total cholesterol in medium VLDL	0.032775	21551
AGT-Genome wide association study ATLAS.csv	4563	31676860	2019	Neurological	Left pars triangularis	0.032948	21821
AGT-Genome wide association study ATLAS.csv	2382	28240269	2017	Cell	ADAMTS1 - A disintegrin and metalloproteinase with thrombospondin motifs 1	0.032994	1000
AGT-Genome wide association study ATLAS.csv	4632	31676860	2019	Neurological	Right inferior lateral ventricle	0.033197	21821
AGT-Genome wide association study ATLAS.csv	912	27005778	2016	Metabolic	Free cholesterol in medium HDL	0.033411	21559
AGT-Genome wide association study ATLAS.csv	2216	28240269	2017	Cell	ACE2 - Angiotensin-converting enzyme 2	0.033742	1000
AGT-Genome wide association study ATLAS.csv	417	24816252	2014	Metabolic	Amino acid::Urea cycle; arginine-, proline-, metabolism::proline	0.033793	7816
AGT-Genome wide association study ATLAS.csv	2450	28240269	2017	Cell	LRIG3 - Leucine-rich repeats and immunoglobulin-like domains protein 3	0.033821	1000
AGT-Genome wide association study ATLAS.csv	2023	24934506	2014	Endocrine	Skin fluorescence	0.033832	1082
AGT-Genome wide association study ATLAS.csv	2485	28240269	2017	Cell	IL17RD - Interleukin-17 receptor D	0.033861	1000
AGT-Genome wide association study ATLAS.csv	4202	31217584	2019	Metabolic	Chronic kidney disease	0.03396	45727
AGT-Genome wide association study ATLAS.csv	3925	28714975	2017	Cardiovascular	Coronary artery disease (SOFT definition including angina)	0.034338	148815
AGT-Genome wide association study ATLAS.csv	110	21378988	2011	Cardiovascular	Coronary artery disease	0.034498	30482
AGT-Genome wide association study ATLAS.csv	534	24816252	2014	Metabolic	Lipid::Lysolipid::1-eicosadienoylglycerophosphocholine*	0.034542	6892
AGT-Genome wide association study ATLAS.csv	2889	28240269	2017	Cell	KYNU - Kynureninase	0.034672	1000
AGT-Genome wide association study ATLAS.csv	2149	28240269	2017	Cell	CAPN1 CAPNS1 - Calpain I	0.035182	1000
AGT-Genome wide association study ATLAS.csv	461	24816252	2014	Metabolic	Energy::Krebs cycle::succinylcarnitine	0.035409	6948
AGT-Genome wide association study ATLAS.csv	2662	28240269	2017	Cell	EPHA5 - Ephrin type-A receptor 5	0.035539	1000
AGT-Genome wide association study ATLAS.csv	424	24816252	2014	Metabolic	Amino acid::Valine, leucine and isoleucine metabolism::4-methyl-2-oxopentanoate	0.035947	7776
AGT-Genome wide association study ATLAS.csv	1201	25087078	2014	Neurological	Focal epilepsy	0.035974	31467
AGT-Genome wide association study ATLAS.csv	4505	31676860	2019	Neurological	Right transverse temporal	0.035998	19629
AGT-Genome wide association study ATLAS.csv	4587	31676860	2019	Neurological	Right lingual	0.036218	21821
AGT-Genome wide association study ATLAS.csv	3124	28240269	2017	Cell	IMPDH2 - Inosine-5'-monophosphate dehydrogenase 2	0.036382	1000
AGT-Genome wide association study ATLAS.csv	405	24816252	2014	Metabolic	Amino acid::Tryptophan metabolism::indolelactate	0.036468	7378
AGT-Genome wide association study ATLAS.csv	1188	23297363	2013	Cardiovascular	Tetralogy of Fallot	0.036628	5159
AGT-Genome wide association study ATLAS.csv	2545	28240269	2017	Cell	DUSP3 - Dual specificity protein phosphatase 3	0.036822	1000
AGT-Genome wide association study ATLAS.csv	4449	31676860	2019	Neurological	Left fusiform	0.036882	19629
AGT-Genome wide association study ATLAS.csv	1193	21102463	2010	Gastrointestinal	Crohn's Disease	0.036978	21447
AGT-Genome wide association study ATLAS.csv	4749	BioRxiv: https://doi.org/10.1101/288657	2019	Neurological	Posterior thalamic radiation (include optic radiation) radial diusivities	0.037013	17706
AGT-Genome wide association study ATLAS.csv	4299	30674883	2019	Dermatological	Vitiligo (late onset)	0.037314	20623
AGT-Genome wide association study ATLAS.csv	3252	31427789	2019	Nutritional	Bread intake	0.037327	377627
AGT-Genome wide association study ATLAS.csv	2421	28240269	2017	Cell	CCDC80 - Coiled-coil domain-containing protein 80	0.037368	1000
AGT-Genome wide association study ATLAS.csv	291	25772697	2015	Immunological	CD4:%Act(DR+38+)	0.037381	669
AGT-Genome wide association study ATLAS.csv	2029	28067908	2017	Gastrointestinal	Crohn's Disease	0.037425	40266
AGT-Genome wide association study ATLAS.csv	4475	31676860	2019	Neurological	Left insula	0.037511	19629
AGT-Genome wide association study ATLAS.csv	2139	28240269	2017	Cell	PRKCA - Protein kinase C alpha type	0.03753	1000
AGT-Genome wide association study ATLAS.csv	2807	28240269	2017	Cell	TKT - Transketolase	0.037737	1000
AGT-Genome wide association study ATLAS.csv	4230	31015401	2019	Environmental	Opioids	0.037849	78808
AGT-Genome wide association study ATLAS.csv	2099	28240269	2017	Cell	IGFBP3 - Insulin-like growth factor-binding protein 3	0.038084	1000
AGT-Genome wide association study ATLAS.csv	3193	31427789	2019	Social Interactions	Number in household	0.038108	384133
AGT-Genome wide association study ATLAS.csv	3187	31427789	2019	Skeletal	Standing height	0.038913	385748
AGT-Genome wide association study ATLAS.csv	4625	31676860	2019	Neurological	Left pallidum	0.03899	21821
AGT-Genome wide association study ATLAS.csv	4050	28358823	2017	Body Structures	Anterior cruciate ligament rupture (fixed effect model)	0.039059	99342
AGT-Genome wide association study ATLAS.csv	513	24816252	2014	Metabolic	Lipid::Ketone bodies::3-hydroxybutyrate (BHBA)	0.039227	7820
AGT-Genome wide association study ATLAS.csv	3246	31427789	2019	Nutritional	Processed meat intake	0.039336	385801
AGT-Genome wide association study ATLAS.csv	2868	28240269	2017	Cell	NCAM1 - Neural cell adhesion molecule 1, 120 kDa isoform	0.039406	1000
AGT-Genome wide association study ATLAS.csv	444	24816252	2014	Metabolic	Carbohydrate::Glycolysis, gluconeogenesis, pyruvate metabolism::pyruvate	0.039417	7682
AGT-Genome wide association study ATLAS.csv	2785	28240269	2017	Cell	PKM2 - Pyruvate kinase PKM	0.039535	1000
AGT-Genome wide association study ATLAS.csv	3339	31427789	2019	Reproduction	Age when periods started (menarche) (female)	0.039689	202636
AGT-Genome wide association study ATLAS.csv	2512	28240269	2017	Cell	TNFSF8 - Tumor necrosis factor ligand superfamily member 8	0.040142	1000
AGT-Genome wide association study ATLAS.csv	757	24816252	2014	Metabolic	Amino acid::Tryptophan metabolism::X-12100--hydroxytryptophan*	0.040224	7499
AGT-Genome wide association study ATLAS.csv	2869	28240269	2017	Cell	PDGFA - Platelet-derived growth factor subunit A	0.040359	1000
AGT-Genome wide association study ATLAS.csv	2911	28240269	2017	Cell	PDIA3 - Protein disulfide-isomerase A3	0.040432	1000
AGT-Genome wide association study ATLAS.csv	2061	28240269	2017	Cell	F11 - Coagulation Factor XI	0.040479	1000
AGT-Genome wide association study ATLAS.csv	4157	30531953	2018	Neurological	Focal Epilepsy	0.040509	39348
AGT-Genome wide association study ATLAS.csv	2812	28240269	2017	Cell	CST2 - Cystatin-SA	0.041097	1000
AGT-Genome wide association study ATLAS.csv	471	24816252	2014	Metabolic	Lipid::Bile acid metabolism::taurocholate	0.041107	4032
AGT-Genome wide association study ATLAS.csv	2015	24369049	2014	Psychiatric	Lithium response in Bipolar I patients - Alda Scale of 4 to 5	0.041856	294
AGT-Genome wide association study ATLAS.csv	1007	27989323	2017	Immunological	Stem cell factor	0.042161	8290
AGT-Genome wide association study ATLAS.csv	4565	31676860	2019	Neurological	Left postcentral	0.042202	21821
AGT-Genome wide association study ATLAS.csv	4755	BioRxiv: https://doi.org/10.1101/288663	2019	Neurological	Sagittal stratum radial diusivities	0.042248	17706
AGT-Genome wide association study ATLAS.csv	810	24816252	2014	Metabolic	::::X-12850	0.042278	6251
AGT-Genome wide association study ATLAS.csv	422	24816252	2014	Metabolic	Amino acid::Valine, leucine and isoleucine metabolism::3-methyl-2-oxobutyrate	0.042973	7648
AGT-Genome wide association study ATLAS.csv	4227	31015401	2019	Environmental	Immunosuppressants	0.043173	272602
AGT-Genome wide association study ATLAS.csv	2873	28240269	2017	Cell	BST1 - ADP-ribosyl cyclase/cyclic ADP-ribose hydrolase 2	0.043595	1000
AGT-Genome wide association study ATLAS.csv	3178	28240269	2017	Cell	SLAMF7 - SLAM family member 7	0.043841	1000
AGT-Genome wide association study ATLAS.csv	2914	28240269	2017	Cell	OLFM4 - Olfactomedin-4	0.043887	1000
AGT-Genome wide association study ATLAS.csv	2044	28459102	2016	Gastrointestinal	Severe gingival inflammation	0.0442	4077
AGT-Genome wide association study ATLAS.csv	273	25772697	2015	Immunological	CD8:%SCM	0.044288	669
AGT-Genome wide association study ATLAS.csv	3144	28240269	2017	Cell	ANXA6 - Annexin A6	0.044543	1000
AGT-Genome wide association study ATLAS.csv	3395	31427789	2019	Psychiatric	Ever highly irritable/argumentative for 2 days	0.0446	126296
AGT-Genome wide association study ATLAS.csv	2841	28240269	2017	Cell	GREM1 - Gremlin-1	0.044688	1000
AGT-Genome wide association study ATLAS.csv	2126	28240269	2017	Cell	HSP90AA1 HSP90AB1 - Heat shock protein HSP 90-alpha/beta	0.04506	1000
AGT-Genome wide association study ATLAS.csv	4056	27920155	2017	Metabolic	Estimated glomerular filtration rate based on serum creatinine (non-diabetic)	0.045286	6597
AGT-Genome wide association study ATLAS.csv	2172	28240269	2017	Cell	CSF3R - Granulocyte colony-stimulating factor receptor	0.045528	1000
AGT-Genome wide association study ATLAS.csv	4539	31676860	2019	Neurological	Right amygdala	0.046029	19629
AGT-Genome wide association study ATLAS.csv	3176	28240269	2017	Cell	PRKCB - Protein kinase C beta type (splice variant beta-II)	0.046048	1000
AGT-Genome wide association study ATLAS.csv	873	27005778	2016	Metabolic	Glycerol	0.046049	20235
AGT-Genome wide association study ATLAS.csv	2508	28240269	2017	Cell	BTK - Tyrosine-protein kinase BTK	0.04613	1000
AGT-Genome wide association study ATLAS.csv	923	27005778	2016	Metabolic	Free cholesterol in medium VLDL	0.046244	21240
AGT-Genome wide association study ATLAS.csv	607	24816252	2014	Metabolic	Peptide::gamma-glutamyl::gamma-glutamylthreonine*	0.046368	4016
AGT-Genome wide association study ATLAS.csv	339	25772697	2015	Immunological	NKeff:%Kir+ (4)	0.046745	669
AGT-Genome wide association study ATLAS.csv	2792	28240269	2017	Cell	PA2G4 - Proliferation-associated protein 2G4	0.046884	1000
AGT-Genome wide association study ATLAS.csv	374	24816252	2014	Metabolic	Amino acid::Glutamate metabolism::glutamate	0.046903	7804
AGT-Genome wide association study ATLAS.csv	2846	28240269	2017	Cell	PCSK7 - Proprotein convertase subtilisin/kexin type 7	0.047103	1000
AGT-Genome wide association study ATLAS.csv	3104	28240269	2017	Cell	NMT1 - Glycylpeptide N-tetradecanoyltransferase 1	0.047111	1000
AGT-Genome wide association study ATLAS.csv	4075	30239722	2018	Metabolic	Body Mass Index (male)	0.047826	374756
AGT-Genome wide association study ATLAS.csv	3000	28240269	2017	Cell	GRN - Granulins	0.048019	1000
AGT-Genome wide association study ATLAS.csv	899	27005778	2016	Metabolic	Cholesterol esters in large VLDL	0.048253	18960
AGT-Genome wide association study ATLAS.csv	4714	BioRxiv: https://doi.org/10.1101/288622	2019	Neurological	Anterior limb of internal capsule mode of anisotropy	0.048451	17706
AGT-Genome wide association study ATLAS.csv	879	27005778	2016	Metabolic	Total cholesterol in IDL	0.048839	19273
AGT-Genome wide association study ATLAS.csv	3039	28240269	2017	Cell	TNFAIP6 - Tumor necrosis factor-inducible gene 6 protein	0.048897	1000
AGT-Genome wide association study ATLAS.csv	979	27989323	2017	Immunological	Hepatocyte growth factor	0.049229	8292
AGT-Genome wide association study ATLAS.csv	2418	28240269	2017	Cell	SFRP1 - Secreted frizzled-related protein 1	0.049353	1000
AGT-Genome wide association study ATLAS.csv	2674	28240269	2017	Cell	MAPKAPK3 - MAP kinase-activated protein kinase 3	0.049732	1000
AGTR1-Genome wide association study ATLAS.csv	3471	31427789	2019	Metabolic	Impedance measures - Trunk predicted mass	6.6602e-08	379469
AGTR1-Genome wide association study ATLAS.csv	3470	31427789	2019	Metabolic	Impedance measures - Trunk fat-free mass	8.5639e-08	379507
AGTR1-Genome wide association study ATLAS.csv	3444	31427789	2019	Metabolic	Impedance measures - Whole body water mass	1.0903e-06	379835
AGTR1-Genome wide association study ATLAS.csv	3443	31427789	2019	Metabolic	Impedance measures - Whole body fat-free mass	1.112e-06	379804
AGTR1-Genome wide association study ATLAS.csv	3446	31427789	2019	Metabolic	Impedance measures - Basal metabolic rate	3.1332e-06	379821
AGTR1-Genome wide association study ATLAS.csv	3466	31427789	2019	Metabolic	Impedance measures - Arm fat-free mass (left)	6.3244e-06	379653
AGTR1-Genome wide association study ATLAS.csv	3467	31427789	2019	Metabolic	Impedance measures - Arm predicted mass (left)	6.5087e-06	379638
AGTR1-Genome wide association study ATLAS.csv	3447	31427789	2019	Metabolic	Impedance measures - Impedance of whole body	4.2546e-05	379792
AGTR1-Genome wide association study ATLAS.csv	3275	31427789	2019	Activities	Childhood sunburn occasions	5.7498e-05	289412
AGTR1-Genome wide association study ATLAS.csv	4294	30696823	2019	Psychiatric	Chronotype	6.3044e-05	449732
AGTR1-Genome wide association study ATLAS.csv	3230	31427789	2019	Psychiatric	Morning/evening person (chronotype)	8.6701e-05	345148
AGTR1-Genome wide association study ATLAS.csv	4295	30696823	2019	Psychiatric	Morning person (binary)	9.172e-05	403195
AGTR1-Genome wide association study ATLAS.csv	3789	30804565	2019	Psychiatric	Morningness	9.519e-05	345552
AGTR1-Genome wide association study ATLAS.csv	3459	31427789	2019	Metabolic	Impedance measures - Leg predicted mass (left)	0.00010189	379761
AGTR1-Genome wide association study ATLAS.csv	3458	31427789	2019	Metabolic	Impedance measures - Leg fat-free mass (left)	0.0001081	379766
AGTR1-Genome wide association study ATLAS.csv	2880	28240269	2017	Cell	EMR2 - EGF-like module-containing mucin-like hormone receptor-like 2	0.00013002	1000
AGTR1-Genome wide association study ATLAS.csv	3449	31427789	2019	Metabolic	Impedance measures - Impedance of leg (left)	0.00020378	379807
AGTR1-Genome wide association study ATLAS.csv	3455	31427789	2019	Metabolic	Impedance measures - Leg predicted mass (right)	0.00021694	379793
AGTR1-Genome wide association study ATLAS.csv	3454	31427789	2019	Metabolic	Impedance measures - Leg fat-free mass (right)	0.00022233	379793
AGTR1-Genome wide association study ATLAS.csv	3462	31427789	2019	Metabolic	Impedance measures - Arm fat-free mass (right)	0.00022386	379723
AGTR1-Genome wide association study ATLAS.csv	3463	31427789	2019	Metabolic	Impedance measures - Arm predicted mass (right)	0.00029992	379716
AGTR1-Genome wide association study ATLAS.csv	3246	31427789	2019	Nutritional	Processed meat intake	0.00032489	385801
AGTR1-Genome wide association study ATLAS.csv	3939	28892062	2017	Metabolic	Body Mass Index	0.00039464	158284
AGTR1-Genome wide association study ATLAS.csv	4289	30804560	2019	Respiratory	PEF	0.00042568	24218
AGTR1-Genome wide association study ATLAS.csv	2017	24369049	2014	Psychiatric	Lithium response in Bipolar I patients - Alda Scale of 6 to 7	0.00060188	294
AGTR1-Genome wide association study ATLAS.csv	1215	27911795	2016	Psychiatric	Alcohol consumption (female)	0.00060764	42900
AGTR1-Genome wide association study ATLAS.csv	4678	BioRxiv: https://doi.org/10.1101/288586	2019	Neurological	Fornix (cres) / Stria terminalis axial diusivities	0.00066343	17706
AGTR1-Genome wide association study ATLAS.csv	3436	31427789	2019	Metabolic	Weight	0.00067973	385473
AGTR1-Genome wide association study ATLAS.csv	3440	31427789	2019	Metabolic	Impedance measures - Weight	0.00085971	379840
AGTR1-Genome wide association study ATLAS.csv	1295	17903298	2007	Endocrine	Diabetes incidence (GEE, adjusted for age, sex and BMI)	0.00093932	1174
AGTR1-Genome wide association study ATLAS.csv	3451	31427789	2019	Metabolic	Impedance measures - Impedance of arm (left)	0.0013586	379803
AGTR1-Genome wide association study ATLAS.csv	4393	29855537	2018	Reproduction	Menstrual fever	0.001491	11348
AGTR1-Genome wide association study ATLAS.csv	2593	28240269	2017	Cell	DPP7 - Dipeptidyl peptidase 2	0.0017306	1000
AGTR1-Genome wide association study ATLAS.csv	4700	BioRxiv: https://doi.org/10.1101/288608	2019	Neurological	Fornix (cres) / Stria terminalis mean diusivities	0.0018285	17706
AGTR1-Genome wide association study ATLAS.csv	3207	31427789	2019	Activities	Duration of moderate activity	0.00212	287789
AGTR1-Genome wide association study ATLAS.csv	744	24816252	2014	Metabolic	::::X-11905	0.002205	4761
AGTR1-Genome wide association study ATLAS.csv	2733	28240269	2017	Cell	CFB - Complement factor B	0.0022148	1000
AGTR1-Genome wide association study ATLAS.csv	314	25772697	2015	Immunological	CD4nv:%TFH (2)	0.0025874	669
AGTR1-Genome wide association study ATLAS.csv	324	25772697	2015	Immunological	CD8mem:%"TFH" (1)	0.0027257	669
AGTR1-Genome wide association study ATLAS.csv	2013	22907730	2013	Psychiatric	Response following treatment of MDD subjects	0.0027494	499
AGTR1-Genome wide association study ATLAS.csv	1222	25607358	2015	Neurological	Mean Hippocampus	0.0028649	13171
AGTR1-Genome wide association study ATLAS.csv	4433	30053915	2018	Cell	Mumps IgG levels	0.0030109	921
AGTR1-Genome wide association study ATLAS.csv	721	24816252	2014	Metabolic	::::X-11540	0.0030122	2688
AGTR1-Genome wide association study ATLAS.csv	3834	27863252	2016	Immunological	Basophil percentage of white cells (two-way meta)	0.0030887	131863
AGTR1-Genome wide association study ATLAS.csv	3984	29497042	2018	Cardiovascular	Heart rate increase	0.0030975	58818
AGTR1-Genome wide association study ATLAS.csv	2	30478444	2019	Psychiatric	Attention deficit hyperactivity disorder	0.0031296	53293
AGTR1-Genome wide association study ATLAS.csv	3638	31427789	2019	Environment	Illnesses of mother: Heart disease	0.0031418	367939
AGTR1-Genome wide association study ATLAS.csv	306	25772697	2015	Immunological	CD4mem:%cFTH (2)	0.0032903	669
AGTR1-Genome wide association study ATLAS.csv	2744	28240269	2017	Cell	IL7 - Interleukin-7	0.0034516	1000
AGTR1-Genome wide association study ATLAS.csv	94	27680694	2016	Metabolic	Birth weight	0.0034619	143677
AGTR1-Genome wide association study ATLAS.csv	261	25772697	2015	Immunological	CD8:%SCM	0.0038497	669
AGTR1-Genome wide association study ATLAS.csv	1904	17903297	2007	Neurological	Hippocampal volume (FBAT, adjusted for multivariable)	0.004294	327
AGTR1-Genome wide association study ATLAS.csv	462	24816252	2014	Metabolic	Energy::Oxidative phosphorylation::acetylphosphate	0.0048952	7789
AGTR1-Genome wide association study ATLAS.csv	1062	19680446	2009	Dermatological	Psoriasis	0.0050461	2716
AGTR1-Genome wide association study ATLAS.csv	1922	17903297	2007	Neurological	Hippocampal volume (FBAT, adjusted for age and sex)	0.005048	327
AGTR1-Genome wide association study ATLAS.csv	2018	24369049	2014	Psychiatric	Lithium response in Bipolar I patients - Alda Scale of 7 to 8	0.0050602	294
AGTR1-Genome wide association study ATLAS.csv	2350	28240269	2017	Cell	WISP1 - WNT1-inducible-signaling pathway protein 1	0.005066	1000
AGTR1-Genome wide association study ATLAS.csv	4044	30124842	2018	Metabolic	Body Mass Index	0.005306	681275
AGTR1-Genome wide association study ATLAS.csv	4479	31676860	2019	Neurological	Right entorhinal	0.005412	19629
AGTR1-Genome wide association study ATLAS.csv	3232	31427789	2019	Neurological	Sleeplessness / insomnia	0.0054275	386078
AGTR1-Genome wide association study ATLAS.csv	3280	31427789	2019	Mortality	Mother still alive	0.0054927	379747
AGTR1-Genome wide association study ATLAS.csv	1906	17903297	2007	Neurological	Hippocampal volume (FBAT, adjusted for multivariable)	0.005799	327
AGTR1-Genome wide association study ATLAS.csv	1938	17903297	2007	Neurological	Hippocampal volume (FBAT, adjusted for multivariable with APOE)	0.006041	327
AGTR1-Genome wide association study ATLAS.csv	531	24816252	2014	Metabolic	Lipid::Lysolipid::1-arachidonoylglycerophosphoethanolamine*	0.0060667	7798
AGTR1-Genome wide association study ATLAS.csv	1067	19430480	2009	Endocrine	Type 1 Diabetes	0.0063315	7982
AGTR1-Genome wide association study ATLAS.csv	611	24816252	2014	Metabolic	Peptide::Polypeptide::HWESASXX*	0.0065403	7700
AGTR1-Genome wide association study ATLAS.csv	207	23263486	2013	Skeletal	Gout	0.0065551	69374
AGTR1-Genome wide association study ATLAS.csv	3380	31427789	2019	Cardiovascular	Systolic Blood Pressure (automated reading)	0.0065833	361402
AGTR1-Genome wide association study ATLAS.csv	3203	31427789	2019	Environment	Age completed full time education	0.0066213	253580
AGTR1-Genome wide association study ATLAS.csv	1924	17903297	2007	Neurological	Hippocampal volume (FBAT, adjusted for age and sex)	0.006832	327
AGTR1-Genome wide association study ATLAS.csv	3652	31427789	2019	Environment	Illnesses of siblings: Diabetes	0.0071177	309116
AGTR1-Genome wide association study ATLAS.csv	981	27989323	2017	Immunological	Interleukin-10	0.0071508	7681
AGTR1-Genome wide association study ATLAS.csv	1240	17903307	2007	Respiratory	Rate of decline of FEV1 (FBAT, adjusted for multiple covariates)	0.007324	1097
AGTR1-Genome wide association study ATLAS.csv	4414	30053915	2018	Cell	Total IgA levels	0.00735	1000
AGTR1-Genome wide association study ATLAS.csv	4290	30804566	2019	Neurological	Frequent insomnia symptoms	0.0074244	237627
AGTR1-Genome wide association study ATLAS.csv	809	24816252	2014	Metabolic	::::X-12847	0.0074994	4036
AGTR1-Genome wide association study ATLAS.csv	2349	28240269	2017	Cell	KLRK1 - NKG2-D type II integral membrane protein	0.0074995	1000
AGTR1-Genome wide association study ATLAS.csv	3798	29942085	2018	Psychiatric	Worry subcluster	0.0075301	348219
AGTR1-Genome wide association study ATLAS.csv	4193	31217584	2019	Cardiovascular	PR interval	0.0075339	17422
AGTR1-Genome wide association study ATLAS.csv	542	24816252	2014	Metabolic	Lipid::Lysolipid::1-palmitoleoylglycerophosphocholine*	0.0075544	7812
AGTR1-Genome wide association study ATLAS.csv	2392	28240269	2017	Cell	CRISP3 - Cysteine-rich secretory protein 3	0.007566	1000
AGTR1-Genome wide association study ATLAS.csv	1293	17903298	2007	Endocrine	Diabetes incidence (GEE, adjusted for age and sex)	0.0076233	1174
AGTR1-Genome wide association study ATLAS.csv	535	24816252	2014	Metabolic	Lipid::Lysolipid::1-eicosatrienoylglycerophosphocholine*	0.0076814	7809
AGTR1-Genome wide association study ATLAS.csv	1940	17903297	2007	Neurological	Hippocampal volume (FBAT, adjusted for multivariable with APOE)	0.007757	327
AGTR1-Genome wide association study ATLAS.csv	258	25772697	2015	Immunological	CD8mem:%CD31+	0.0079049	669
AGTR1-Genome wide association study ATLAS.csv	607	24816252	2014	Metabolic	Peptide::gamma-glutamyl::gamma-glutamylthreonine*	0.0080273	4016
AGTR1-Genome wide association study ATLAS.csv	2091	28240269	2017	Cell	GFRA2 - GDNF family receptor alpha-2	0.008136	1000
AGTR1-Genome wide association study ATLAS.csv	323	25772697	2015	Immunological	CD8mem:%"Th1*"	0.0083662	669
AGTR1-Genome wide association study ATLAS.csv	3835	27863252	2016	Immunological	Basophil percentage of granulocytes (two-way meta)	0.0084104	131536
AGTR1-Genome wide association study ATLAS.csv	1841	17903296	2007	Skeletal	Neck width (GEE, male, adjusted for age)	0.008461	477
AGTR1-Genome wide association study ATLAS.csv	3206	31427789	2019	Activities	Number of days/week of moderate physical activity 10+ minutes	0.0084924	367908
AGTR1-Genome wide association study ATLAS.csv	3902	27863252	2016	Immunological	Reticulocyte count (three-way meta)	0.0086639	170641
AGTR1-Genome wide association study ATLAS.csv	3253	31427789	2019	Nutritional	Cereal intake	0.0087251	368775
AGTR1-Genome wide association study ATLAS.csv	3551	31427789	2019	Cardiovascular	Vascular/heart problems diagnosed by doctor: High blood pressure	0.0088707	385699
AGTR1-Genome wide association study ATLAS.csv	3555	31427789	2019	Activities	Medication for cholesterol, blood pressure, diabetes, or take exogenous hormones: Blood pressure medication	0.0088979	207533
AGTR1-Genome wide association study ATLAS.csv	3515	31427789	2019	Activities	Gas or solid-fuel cooking/heating: An open solid fuel fire that you use regularly in winter time	0.008909	385289
AGTR1-Genome wide association study ATLAS.csv	4301	30664634	2019	Metabolic	Arms-arm fat ratio (male)	0.0089663	167431
AGTR1-Genome wide association study ATLAS.csv	1141	27494321	2016	Psychiatric	Chronotype	0.0090251	128266
AGTR1-Genome wide association study ATLAS.csv	3492	31427789	2019	Nutritional	Coffee type: Decaffeinated coffee (any type)	0.0091615	303811
AGTR1-Genome wide association study ATLAS.csv	787	24816252	2014	Metabolic	::::X-12644	0.0092129	7795
AGTR1-Genome wide association study ATLAS.csv	2039	27656889	2016	Cognitive	Attention function - Orienting - Child	0.0093896	1655
AGTR1-Genome wide association study ATLAS.csv	4064	28452372	2017	Metabolic	Estimated glomerular filtration rate based on cystain C	0.0094405	24061
AGTR1-Genome wide association study ATLAS.csv	2383	28240269	2017	Cell	ADAMTS13 - A disintegrin and metalloproteinase with thrombospondin motifs 13	0.0095192	1000
AGTR1-Genome wide association study ATLAS.csv	4272	30846698	2019	Psychiatric	Sleep duration	0.0098354	446118
AGTR1-Genome wide association study ATLAS.csv	264	25772697	2015	Immunological	CD4:%SCM	0.010148	669
AGTR1-Genome wide association study ATLAS.csv	4037	BioRxiv: https://doi.org/10.1101/224774	2017	Psychiatric	Autism spectrum disorder	0.010263	46350
AGTR1-Genome wide association study ATLAS.csv	3235	31427789	2019	Psychiatric	Current tobacco smoking	0.010293	386150
AGTR1-Genome wide association study ATLAS.csv	3412	31427789	2019	Skeletal	Sitting height	0.010378	385393
AGTR1-Genome wide association study ATLAS.csv	3205	31427789	2019	Activities	Duration of walks	0.010426	330974
AGTR1-Genome wide association study ATLAS.csv	3540	31427789	2019	Activities	Reason for glasses/contact lenses: For long-sightedness, i.e. for distance and near, but particularly for near tasks like reading (called 'hypermetropia')	0.010488	78647
AGTR1-Genome wide association study ATLAS.csv	14	28439101	2017	Psychiatric	Posttraumatic stress disorder	0.010634	9537
AGTR1-Genome wide association study ATLAS.csv	278	25772697	2015	Immunological	CD8:%Act(25+38+)	0.010731	669
AGTR1-Genome wide association study ATLAS.csv	316	25772697	2015	Immunological	CD8mem:%"Th17"	0.011133	669
AGTR1-Genome wide association study ATLAS.csv	268	25772697	2015	Immunological	CD4:%TM (1)	0.01123	669
AGTR1-Genome wide association study ATLAS.csv	4557	31676860	2019	Neurological	Left medial orbitofrontal	0.011531	21821
AGTR1-Genome wide association study ATLAS.csv	1597	17903294	2007	Hematological	Platelet aggregation to collagen (at exam 5, GEE, adjusted for multivariable)	0.011564	702
AGTR1-Genome wide association study ATLAS.csv	530	24816252	2014	Metabolic	Lipid::Lysolipid::1-arachidonoylglycerophosphocholine*	0.011602	7507
AGTR1-Genome wide association study ATLAS.csv	3941	28892062	2017	Metabolic	Body Mass Index (female)	0.01184	72390
AGTR1-Genome wide association study ATLAS.csv	3062	28240269	2017	Cell	LILRB2 - Leukocyte immunoglobulin-like receptor subfamily B member 2	0.011856	1000
AGTR1-Genome wide association study ATLAS.csv	4682	BioRxiv: https://doi.org/10.1101/288590	2019	Neurological	Posterior limb of internal capsule axial diusivities	0.012399	17706
AGTR1-Genome wide association study ATLAS.csv	2634	28240269	2017	Cell	CDKN1B - Cyclin-dependent kinase inhibitor 1B	0.01244	1000
AGTR1-Genome wide association study ATLAS.csv	199	26631737	2016	Metabolic	Urinary albumin-to-creatinine ratio (non-diabetic)	0.012504	46061
AGTR1-Genome wide association study ATLAS.csv	3204	31427789	2019	Activities	Number of days/week walked 10+ minutes	0.012651	379927
AGTR1-Genome wide association study ATLAS.csv	3448	31427789	2019	Metabolic	Impedance measures - Impedance of leg (right)	0.01271	379813
AGTR1-Genome wide association study ATLAS.csv	3833	27863252	2016	Immunological	Basophil count (two-way meta)	0.012788	131860
AGTR1-Genome wide association study ATLAS.csv	4330	30595539	2018	Dermatological	Postburn scar pliability	0.012822	665
AGTR1-Genome wide association study ATLAS.csv	4312	30659137	2019	Neurological	White matter hyperintensities	0.012824	11226
AGTR1-Genome wide association study ATLAS.csv	3903	27863252	2016	Immunological	Reticulocyte fraction of red cells (three-way meta)	0.012852	170690
AGTR1-Genome wide association study ATLAS.csv	2764	28240269	2017	Cell	H2AFZ - Histone H2A.z	0.013185	1000
AGTR1-Genome wide association study ATLAS.csv	3989	29497042	2018	Cardiovascular	Heart rate recovery at 50 secnds	0.013482	58818
AGTR1-Genome wide association study ATLAS.csv	3655	31427789	2019	Psychiatric	Smoking status: Previous vs Current	0.013853	177025
AGTR1-Genome wide association study ATLAS.csv	4704	BioRxiv: https://doi.org/10.1101/288612	2019	Neurological	Posterior limb of internal capsule mean diusivities	0.014384	17706
AGTR1-Genome wide association study ATLAS.csv	3009	28240269	2017	Cell	MMP14 - Matrix metalloproteinase-14	0.014429	1000
AGTR1-Genome wide association study ATLAS.csv	824	24816252	2014	Metabolic	::::X-13553	0.014464	3085
AGTR1-Genome wide association study ATLAS.csv	2026	22952603	2012	Psychiatric	Baseline positive affect factor score	0.014686	381
AGTR1-Genome wide association study ATLAS.csv	676	24816252	2014	Metabolic	::::X-08988	0.014709	7776
AGTR1-Genome wide association study ATLAS.csv	2022	23583980	2013	Respiratory	Fibrotic idiopathic interstitial pneumonias	0.014742	6299
AGTR1-Genome wide association study ATLAS.csv	1208	26635072	2015	Respiratory	FEV1	0.015083	38199
AGTR1-Genome wide association study ATLAS.csv	95	27680694	2016	Metabolic	Birth weight	0.015493	153781
AGTR1-Genome wide association study ATLAS.csv	3192	31427789	2019	Activities	Length of time at current address	0.015747	385315
AGTR1-Genome wide association study ATLAS.csv	656	24816252	2014	Metabolic	::::X-03088	0.015948	7474
AGTR1-Genome wide association study ATLAS.csv	2219	28240269	2017	Cell	ANGPT1 - Angiopoietin-1	0.016087	1000
AGTR1-Genome wide association study ATLAS.csv	3998	29500382	2018	Psychiatric	Tense / 'highly strung' (TENSE)	0.016315	263635
AGTR1-Genome wide association study ATLAS.csv	2696	28240269	2017	Cell	RPS7 - 40S ribosomal protein S7	0.01664	1000
AGTR1-Genome wide association study ATLAS.csv	1973	17903295	2007	Mortality	Morbidity-free survival (at age 65, GEE, adjusted for multivariable)	0.016767	558
AGTR1-Genome wide association study ATLAS.csv	197	26631737	2016	Metabolic	Urinary albumin-to-creatinine ratio	0.016815	54450
AGTR1-Genome wide association study ATLAS.csv	550	24816252	2014	Metabolic	Lipid::Lysolipid::2-oleoylglycerophosphocholine*	0.016852	7524
AGTR1-Genome wide association study ATLAS.csv	1247	17903307	2007	Respiratory	Mean FEV1/FVC from exam 3 and 5 (GEE, adjusted for multiple covariates)	0.016893	1222
AGTR1-Genome wide association study ATLAS.csv	4249	30952852	2019	Psychiatric	Diurnal inactivity duration	0.017358	84757
AGTR1-Genome wide association study ATLAS.csv	1643	17903293	2007	Immunological	Osteoprotegerin (at exam 7, GEE, adjusted for age and sex)	0.01753	1005
AGTR1-Genome wide association study ATLAS.csv	3988	29497042	2018	Cardiovascular	Heart rate recovery at 40 secnds	0.018085	58818
AGTR1-Genome wide association study ATLAS.csv	4580	31676860	2019	Neurological	Right entorhinal	0.018476	21821
AGTR1-Genome wide association study ATLAS.csv	1799	17903306	2007	Cardiovascular	High frequency power HRV (cohort exam 18 offsprint exam 3, GEE, adjusted for age and HR)	0.018544	747
AGTR1-Genome wide association study ATLAS.csv	1808	17903306	2007	Cardiovascular	Total power HRV (cohort exam 18 offsprint exam 3, FBAT, adjusted for age and HR)	0.018606	747
AGTR1-Genome wide association study ATLAS.csv	4050	28358823	2017	Body Structures	Anterior cruciate ligament rupture (fixed effect model)	0.018638	99342
AGTR1-Genome wide association study ATLAS.csv	2438	28240269	2017	Cell	CST6 - Cystatin-M	0.01902	1000
AGTR1-Genome wide association study ATLAS.csv	3243	31427789	2019	Nutritional	Dried fruit intake	0.019043	351952
AGTR1-Genome wide association study ATLAS.csv	3274	31427789	2019	Dermatological	Ease of skin tanning	0.019154	378364
AGTR1-Genome wide association study ATLAS.csv	1837	17903296	2007	Skeletal	Neck width (GEE, male, adjusted for multivariable)	0.019267	477
AGTR1-Genome wide association study ATLAS.csv	1455	17903299	2007	Metabolic	Low-density lipoprotein cholesterol (at exam 7, GEE, adjusted for age and sex)	0.01931	1056
AGTR1-Genome wide association study ATLAS.csv	4043	30124842	2018	Skeletal	Height	0.020096	693529
AGTR1-Genome wide association study ATLAS.csv	563	24816252	2014	Metabolic	Lipid::Monoacylglycerol::1-oleoylglycerol (1-monoolein)	0.020282	5717
AGTR1-Genome wide association study ATLAS.csv	3291	31427789	2019	Psychiatric	Tense / 'highly strung'	0.021032	374129
AGTR1-Genome wide association study ATLAS.csv	4074	30239722	2018	Metabolic	Body Mass Index	0.021082	806834
AGTR1-Genome wide association study ATLAS.csv	4590	31676860	2019	Neurological	Right parahippocampal	0.021206	21821
AGTR1-Genome wide association study ATLAS.csv	4118	29403010	2018	Metabolic	Zinc sulfate turbidity test	0.021279	12303
AGTR1-Genome wide association study ATLAS.csv	2470	28240269	2017	Cell	CA6 - Carbonic anhydrase 6	0.021419	1000
AGTR1-Genome wide association study ATLAS.csv	552	24816252	2014	Metabolic	Lipid::Lysolipid::2-stearoylglycerophosphocholine*	0.021611	7730
AGTR1-Genome wide association study ATLAS.csv	661	24816252	2014	Metabolic	::::X-04498	0.021731	7160
AGTR1-Genome wide association study ATLAS.csv	194	26831199	2016	Metabolic	Estimated glomerular filtration rate based on cystain C	0.021784	33152
AGTR1-Genome wide association study ATLAS.csv	1755	17903305	2007	Neoplasms	Cancer (GEE, adjusted for age and sex)	0.021926	1335
AGTR1-Genome wide association study ATLAS.csv	2816	28240269	2017	Cell	SAA1 - Serum amyloid A-1 protein	0.022056	1000
AGTR1-Genome wide association study ATLAS.csv	227	25772697	2015	Immunological	mDC:%CD1c-	0.022101	669
AGTR1-Genome wide association study ATLAS.csv	3209	31427789	2019	Activities	Duration of vigorous activity	0.022181	210896
AGTR1-Genome wide association study ATLAS.csv	3188	31427789	2019	Cardiovascular	Pulse rate (automated reading)	0.022352	361411
AGTR1-Genome wide association study ATLAS.csv	1596	17903294	2007	Hematological	Platelet aggregation to collagen (at exam 5, FBAT, adjusted for multivariable)	0.022369	702
AGTR1-Genome wide association study ATLAS.csv	3453	31427789	2019	Metabolic	Impedance measures - Leg fat mass (right)	0.022582	379802
AGTR1-Genome wide association study ATLAS.csv	4051	28358823	2017	Body Structures	Anterior cruciate ligament rupture (random effect model)	0.022864	99342
AGTR1-Genome wide association study ATLAS.csv	2735	28240269	2017	Cell	FN1 - Fibronectin	0.022994	1000
AGTR1-Genome wide association study ATLAS.csv	3622	31427789	2019	Activities	Treatment/medication code: cod liver oil capsule	0.023074	280443
AGTR1-Genome wide association study ATLAS.csv	188	25673412	2015	Metabolic	Waist-hip ratio (male, adjusted for BMI)	0.023257	99078
AGTR1-Genome wide association study ATLAS.csv	719	24816252	2014	Metabolic	::::X-11537	0.023355	2719
AGTR1-Genome wide association study ATLAS.csv	2633	28240269	2017	Cell	IFNGR1 - Interferon gamma receptor 1	0.023454	1000
AGTR1-Genome wide association study ATLAS.csv	187	25673412	2015	Metabolic	Waist-hip ratio (male, adjusted for BMI)	0.023491	93480
AGTR1-Genome wide association study ATLAS.csv	4009	29559693	2018	Skeletal	Osteoarthritis of hip or knee (hospital diagnosed)	0.023528	32970
AGTR1-Genome wide association study ATLAS.csv	3163	28240269	2017	Cell	TNFRSF13C - Tumor necrosis factor receptor superfamily member 13C	0.024044	1000
AGTR1-Genome wide association study ATLAS.csv	4027	30482948	2018	Psychiatric	Alcohol dependency (full discovery samples)	0.024234	52848
AGTR1-Genome wide association study ATLAS.csv	137	23754948	2013	Metabolic	Weight (female)	0.024339	72378
AGTR1-Genome wide association study ATLAS.csv	2015	24369049	2014	Psychiatric	Lithium response in Bipolar I patients - Alda Scale of 4 to 5	0.024377	294
AGTR1-Genome wide association study ATLAS.csv	4316	30643251	2019	Psychiatric	Smoking cessation	0.024526	312821
AGTR1-Genome wide association study ATLAS.csv	4168	29891935	2018	Ophthalmological	Open-angle glaucoma (fixed-effect model)	0.025216	176890
AGTR1-Genome wide association study ATLAS.csv	630	24816252	2014	Metabolic	Xenobiotics::Food component, Plant::ergothioneine	0.025293	4453
AGTR1-Genome wide association study ATLAS.csv	4456	31676860	2019	Neurological	Left medial orbitofrontal	0.025503	19629
AGTR1-Genome wide association study ATLAS.csv	271	25772697	2015	Immunological	CD4:%CD244+ NaÃ¯ve	0.025575	669
AGTR1-Genome wide association study ATLAS.csv	272	25772697	2015	Immunological	CD4:%RTE	0.025676	669
AGTR1-Genome wide association study ATLAS.csv	536	24816252	2014	Metabolic	Lipid::Lysolipid::1-heptadecanoylglycerophosphocholine	0.025902	7422
AGTR1-Genome wide association study ATLAS.csv	4334	30552067	2018	Respiratory	Asthma	0.02605	30810
AGTR1-Genome wide association study ATLAS.csv	612	24816252	2014	Metabolic	Xenobiotics::Benzoate metabolism::2-hydroxyhippurate (salicylurate)	0.026074	2592
AGTR1-Genome wide association study ATLAS.csv	3690	31427789	2019	Psychiatric	Diagnoses - secondary ICD10: F32 Major depressive disorder, single episode	0.026172	244890
AGTR1-Genome wide association study ATLAS.csv	1810	17903306	2007	Cardiovascular	Very low frequency power HRV (cohort exam 18 offsprint exam 3, FBAT, adjusted for age and HR)	0.026328	747
AGTR1-Genome wide association study ATLAS.csv	1798	17903306	2007	Cardiovascular	High frequency power HRV (cohort exam 18 offsprint exam 3, FBAT, adjusted for age and HR)	0.026374	747
AGTR1-Genome wide association study ATLAS.csv	301	25772697	2015	Immunological	CD4mem:%PD1-R6+	0.026403	669
AGTR1-Genome wide association study ATLAS.csv	4480	31676860	2019	Neurological	Right fusiform	0.026474	19629
AGTR1-Genome wide association study ATLAS.csv	4008	29559693	2018	Skeletal	Osteoarthritis of knee (hospital diagnosed)	0.026536	22347
AGTR1-Genome wide association study ATLAS.csv	3233	31427789	2019	Psychiatric	Snoring	0.026778	359498
AGTR1-Genome wide association study ATLAS.csv	3465	31427789	2019	Metabolic	Impedance measures - Arm fat mass (left)	0.027087	379663
AGTR1-Genome wide association study ATLAS.csv	1049	16252231	2005	Neurological	Parkinson disease of sibling pairs (tier 1)	0.027137	886
AGTR1-Genome wide association study ATLAS.csv	3685	31427789	2019	Endocrine	Diagnoses - secondary ICD10: E03 Other hypothyroidism	0.027204	244890
AGTR1-Genome wide association study ATLAS.csv	4258	30946739	2019	Activities	Facial attractiveness (male-coder, male samples)	0.027375	1792
AGTR1-Genome wide association study ATLAS.csv	2016	24369049	2014	Psychiatric	Lithium response in Bipolar I patients - Alda Scale of 5 to 6	0.027387	294
AGTR1-Genome wide association study ATLAS.csv	1635	17903293	2007	Immunological	Monocyte chemoattractant protein 1 (at exam 7, GEE, adjusted for age and sex)	0.027686	989
AGTR1-Genome wide association study ATLAS.csv	3645	31427789	2019	Environment	Illnesses of mother: Diabetes	0.027899	367939
AGTR1-Genome wide association study ATLAS.csv	335	25772697	2015	Immunological	NKeff:%314-158a+	0.027972	669
AGTR1-Genome wide association study ATLAS.csv	4494	31676860	2019	Neurological	Right pericalcarine	0.028271	19629
AGTR1-Genome wide association study ATLAS.csv	4127	29403010	2018	Metabolic	Lactate dehydrogenase	0.028372	126319
AGTR1-Genome wide association study ATLAS.csv	1975	17903295	2007	Mortality	Morbidity-free survival (at age 65, GEE, adjusted for birth-cohort)	0.028403	558
AGTR1-Genome wide association study ATLAS.csv	1766	17903304	2007	Cardiovascular	Heart failure (free of MI, FBAT, adjusted for multivariable)	0.028411	1345
AGTR1-Genome wide association study ATLAS.csv	1668	17903293	2007	Metabolic	Aspartate aminotransferase (at exam 2, FBAT, adjusted for multivariable)	0.028697	904
AGTR1-Genome wide association study ATLAS.csv	2538	28240269	2017	Cell	SELE - E-Selectin	0.028749	1000
AGTR1-Genome wide association study ATLAS.csv	3223	31427789	2019	Activities	Length of mobile phone use	0.02879	381616
AGTR1-Genome wide association study ATLAS.csv	2177	28240269	2017	Cell	NANOG - Homeobox protein NANOG	0.028854	1000
AGTR1-Genome wide association study ATLAS.csv	2179	28240269	2017	Cell	NOV - Protein NOV homolog	0.029129	1000
AGTR1-Genome wide association study ATLAS.csv	346	25772697	2015	Immunological	NKearly:%337+335+2-	0.029137	669
AGTR1-Genome wide association study ATLAS.csv	229	25772697	2015	Immunological	mDC:%CD1c+	0.029267	669
AGTR1-Genome wide association study ATLAS.csv	3940	28892062	2017	Metabolic	Body Mass Index (male)	0.02929	85894
AGTR1-Genome wide association study ATLAS.csv	1645	17903293	2007	Immunological	Osteoprotegerin (at exam 7, GEE, adjusted for multivariable	0.029376	1005
AGTR1-Genome wide association study ATLAS.csv	580	24816252	2014	Metabolic	Nucleotide::Purine metabolism, (hypo)xanthine, inosine containing::hypoxanthine	0.029475	7287
AGTR1-Genome wide association study ATLAS.csv	4378	30940143	2019	Cardiovascular	High blood pressure	0.029582	458554
AGTR1-Genome wide association study ATLAS.csv	1990	17903295	2007	Mortality	Age at death (FBAT, adjusted for birth-cohort)	0.02963	1345
AGTR1-Genome wide association study ATLAS.csv	1666	17903293	2007	Metabolic	Aspartate aminotransferase (at exam 2, FBAT, adjusted for age and sex)	0.029686	904
AGTR1-Genome wide association study ATLAS.csv	4189	31217584	2019	Metabolic	Fasting glucose	0.029688	23911
AGTR1-Genome wide association study ATLAS.csv	3272	31427789	2019	Cognitive	Handedness (chirality/laterality)	0.029816	386276
AGTR1-Genome wide association study ATLAS.csv	3177	28240269	2017	Cell	PRKCG - Protein kinase C gamma type	0.030065	1000
AGTR1-Genome wide association study ATLAS.csv	3461	31427789	2019	Metabolic	Impedance measures - Arm fat mass (right)	0.030382	379725
AGTR1-Genome wide association study ATLAS.csv	847	24816252	2014	Metabolic	::::X-14745	0.030426	5602
AGTR1-Genome wide association study ATLAS.csv	3216	31427789	2019	Social Interactions	Frequency of friend/family visits	0.030548	383941
AGTR1-Genome wide association study ATLAS.csv	3450	31427789	2019	Metabolic	Impedance measures - Impedance of arm (right)	0.031095	379786
AGTR1-Genome wide association study ATLAS.csv	2412	28240269	2017	Cell	NID1 - Nidogen-1	0.031159	1000
AGTR1-Genome wide association study ATLAS.csv	4208	31152163	2019	Metabolic	Blood urea nitrogen	0.031291	243031
AGTR1-Genome wide association study ATLAS.csv	1626	17903293	2007	Immunological	Interleukin 6 (at exam 7, FBAT, adjusted for age and sex)	0.031352	1006
AGTR1-Genome wide association study ATLAS.csv	1360	17903299	2007	Metabolic	Total cholesterol (at exam 2, FBAT, adjusted for age and sex)	0.031388	1069
AGTR1-Genome wide association study ATLAS.csv	3	30478444	2019	Psychiatric	Attention deficit hyperactivity disorder	0.031422	55374
AGTR1-Genome wide association study ATLAS.csv	2084	28240269	2017	Cell	KIT - Mast/stem cell growth factor receptor Kit	0.031656	1000
AGTR1-Genome wide association study ATLAS.csv	533	24816252	2014	Metabolic	Lipid::Lysolipid::1-docosahexaenoylglycerophosphocholine*	0.031852	7798
AGTR1-Genome wide association study ATLAS.csv	4493	31676860	2019	Neurological	Right pars triangularis	0.032178	19629
AGTR1-Genome wide association study ATLAS.csv	1109	27918534	2017	Metabolic	Subcutaneous adipose tissue volume (male)	0.032699	8685
AGTR1-Genome wide association study ATLAS.csv	4665	BioRxiv: https://doi.org/10.1101/288573	2019	Neurological	Superior fronto-occipital fasciculus fractional anisotropy	0.033725	17706
AGTR1-Genome wide association study ATLAS.csv	3987	29497042	2018	Cardiovascular	Heart rate recovery at 30 secnds	0.033754	58818
AGTR1-Genome wide association study ATLAS.csv	2014	22907730	2013	Psychiatric	Response following 8-week treatment of MDD subjects	0.034115	398
AGTR1-Genome wide association study ATLAS.csv	4431	30053915	2018	Cell	Toxoplasmosis IgG levels	0.034367	559
AGTR1-Genome wide association study ATLAS.csv	972	27005778	2016	Metabolic	Triglycerides in chylomicrons and extremely large VLDL	0.034387	21540
AGTR1-Genome wide association study ATLAS.csv	3435	31427789	2019	Metabolic	Body Mass Index	0.0345	385336
AGTR1-Genome wide association study ATLAS.csv	3475	31427789	2019	Activities	Type of accommodation lived in: A flat, maisonette or apartment	0.034652	386168
AGTR1-Genome wide association study ATLAS.csv	1804	17903306	2007	Cardiovascular	PNN50 HRV (cohort exam 18 offsprint exam 3, FBAT, adjusted for age and HR)	0.034768	747
AGTR1-Genome wide association study ATLAS.csv	3293	31427789	2019	Psychiatric	Suffer from 'nerves'	0.035004	372273
AGTR1-Genome wide association study ATLAS.csv	2023	24934506	2014	Endocrine	Skin fluorescence	0.03509	1082
AGTR1-Genome wide association study ATLAS.csv	497	24816252	2014	Metabolic	Lipid::Fatty acid, dicarboxylate::2-hydroxyglutarate	0.035154	6287
AGTR1-Genome wide association study ATLAS.csv	3101	28240269	2017	Cell	PDE7A - High affinity cAMP-specific 3',5'-cyclic phosphodiesterase 7A	0.035443	1000
AGTR1-Genome wide association study ATLAS.csv	3186	31427789	2019	Metabolic	Hip circumference	0.035608	385887
AGTR1-Genome wide association study ATLAS.csv	1595	17903294	2007	Hematological	Platelet aggregation to collagen (at exam 5, GEE, adjusted for age and sex)	0.035793	702
AGTR1-Genome wide association study ATLAS.csv	2011	22907730	2013	Psychiatric	Remission following treatment of MDD subjects	0.036268	499
AGTR1-Genome wide association study ATLAS.csv	3680	31427789	2019	Endocrine	Diagnoses - main ICD10: N39 Other disorders of urinary system	0.036315	300791
AGTR1-Genome wide association study ATLAS.csv	3499	31427789	2019	Dermatological	Hair colour (natural, before greying): Black	0.036375	385603
AGTR1-Genome wide association study ATLAS.csv	4427	30053915	2018	Immunological	Epstein Barr Virus antigen EBNA seropositivity	0.036424	1000
AGTR1-Genome wide association study ATLAS.csv	1619	17903293	2007	Immunological	CD40 Ligand serum (at exam 7, GEE, adjusted for age and sex)	0.036576	998
AGTR1-Genome wide association study ATLAS.csv	1213	27911795	2016	Psychiatric	Alcohol consumption	0.036663	70460
AGTR1-Genome wide association study ATLAS.csv	1029	17903296	2007	Skeletal	Neck Width (GEE, adjusted for age and sex)	0.036828	1095
AGTR1-Genome wide association study ATLAS.csv	2973	28240269	2017	Cell	AGR2 - Anterior gradient protein 2 homolog	0.036837	1000
AGTR1-Genome wide association study ATLAS.csv	1637	17903293	2007	Immunological	Monocyte chemoattractant protein 1 (at exam 7, GEE, adjusted for multivariable)	0.036982	989
AGTR1-Genome wide association study ATLAS.csv	1757	17903305	2007	Neoplasms	Cancer (GEE, adjusted for multivariable)	0.03723	1335
AGTR1-Genome wide association study ATLAS.csv	458	24816252	2014	Metabolic	Energy::Krebs cycle::alpha-ketoglutarate	0.037425	6130
AGTR1-Genome wide association study ATLAS.csv	2430	28240269	2017	Cell	FCER2 - Low affinity immunoglobulin epsilon Fc receptor	0.037514	1000
AGTR1-Genome wide association study ATLAS.csv	231	25772697	2015	Immunological	mDC (2):%CD1c-	0.037713	669
AGTR1-Genome wide association study ATLAS.csv	1371	17903299	2007	Metabolic	Total cholesterol (at exam 7, GEE, adjusted for age and sex)	0.038379	1069
AGTR1-Genome wide association study ATLAS.csv	326	25772697	2015	Immunological	CD8mem:%"TFH" (3)	0.03845	669
AGTR1-Genome wide association study ATLAS.csv	1998	17658951	2007	Metabolic	Body Mass Index	0.038551	1410
AGTR1-Genome wide association study ATLAS.csv	3829	26993346	2016	Neurological	Posterior cortical atrophy	0.038673	10840
AGTR1-Genome wide association study ATLAS.csv	1688	17903293	2007	Metabolic	Vitamin D plasma 25(OH)-D (at exam 6 or 7, FBAT, adjusted for multivariable)	0.038723	517
AGTR1-Genome wide association study ATLAS.csv	3936	28878392	2017	Metabolic	Sialylation	0.038751	2078
AGTR1-Genome wide association study ATLAS.csv	2093	28240269	2017	Cell	CCL5 - C-C motif chemokine 5	0.039227	1000
AGTR1-Genome wide association study ATLAS.csv	200	26631737	2016	Metabolic	Microalbuminuria	0.039343	54116
AGTR1-Genome wide association study ATLAS.csv	4721	BioRxiv: https://doi.org/10.1101/288629	2019	Neurological	Fornix (column and body of fornix) mode of anisotropy	0.039897	17706
AGTR1-Genome wide association study ATLAS.csv	1363	17903299	2007	Metabolic	Total cholesterol (at exam 3, GEE, adjusted for age and sex)	0.039941	1069
AGTR1-Genome wide association study ATLAS.csv	3263	31427789	2019	Psychiatric	Average weekly champagne plus white wine intake	0.039985	273869
AGTR1-Genome wide association study ATLAS.csv	3020	28240269	2017	Cell	PLA2G7 - Platelet-activating factor acetylhydrolase	0.040085	1000
AGTR1-Genome wide association study ATLAS.csv	3445	31427789	2019	Metabolic	Impedance measures - Body Mass Index (BMI)	0.040098	379831
AGTR1-Genome wide association study ATLAS.csv	3648	31427789	2019	Environment	Illnesses of siblings: Heart disease	0.04019	309116
AGTR1-Genome wide association study ATLAS.csv	4145	29403010	2018	Cardiovascular	Pulse pressure	0.040423	136249
AGTR1-Genome wide association study ATLAS.csv	993	27989323	2017	Immunological	Interleukin-6	0.040424	8189
AGTR1-Genome wide association study ATLAS.csv	1621	17903293	2007	Immunological	CD40 Ligand serum (at exam 7, GEE, adjusted for multivariable)	0.040509	998
AGTR1-Genome wide association study ATLAS.csv	3752	31427789	2019	Psychiatric	Traumatic events - Felt distant from other people in past month	0.040591	57017
AGTR1-Genome wide association study ATLAS.csv	2821	28240269	2017	Cell	NGF - beta-nerve growth factor	0.04088	1000
AGTR1-Genome wide association study ATLAS.csv	474	24816252	2014	Metabolic	Lipid::Bile acid metabolism::ursodeoxycholate	0.041016	5477
AGTR1-Genome wide association study ATLAS.csv	4489	31676860	2019	Neurological	Right parahippocampal	0.041115	19629
AGTR1-Genome wide association study ATLAS.csv	3378	31427789	2019	Reproduction	Number of pregnancy terminations (female)	0.041138	65225
AGTR1-Genome wide association study ATLAS.csv	3270	31427789	2019	Metabolic	Comparative body size at age 10	0.041378	379749
AGTR1-Genome wide association study ATLAS.csv	2339	28240269	2017	Cell	SPARC - SPARC	0.041446	1000
AGTR1-Genome wide association study ATLAS.csv	1806	17903306	2007	Cardiovascular	SDNN HRV (cohort exam 18 offsprint exam 3, FBAT, adjusted for age and HR)	0.041509	747
AGTR1-Genome wide association study ATLAS.csv	3794	30804565	2019	Psychiatric	Snoring	0.041591	359916
AGTR1-Genome wide association study ATLAS.csv	1802	17903306	2007	Cardiovascular	Low frequency power HRV (cohort exam 18 offsprint exam 3, FBAT, adjusted for age and HR)	0.04175	747
AGTR1-Genome wide association study ATLAS.csv	302	25772697	2015	Immunological	CD4mem:R6+	0.041905	669
AGTR1-Genome wide association study ATLAS.csv	4743	BioRxiv: https://doi.org/10.1101/288651	2019	Neurological	Fornix (column and body of fornix) radial diusivities	0.041962	17706
AGTR1-Genome wide association study ATLAS.csv	561	24816252	2014	Metabolic	Lipid::Medium chain fatty acid::undecanoate (11:0)	0.042446	7500
AGTR1-Genome wide association study ATLAS.csv	2824	28240269	2017	Cell	FGF12 - Fibroblast growth factor 12	0.042453	1000
AGTR1-Genome wide association study ATLAS.csv	4594	31676860	2019	Neurological	Right pars triangularis	0.042455	21821
AGTR1-Genome wide association study ATLAS.csv	3323	31427789	2019	Activities	Ever had prostate specific antigen (PSA) test	0.042594	168371
AGTR1-Genome wide association study ATLAS.csv	2056	18668548	2008	Connective Tissue	Rheumatoid Arthritis	0.042991	800
AGTR1-Genome wide association study ATLAS.csv	3477	31427789	2019	Activities	Own or rent accommodation lived in: Own with a mortgage	0.043014	383032
AGTR1-Genome wide association study ATLAS.csv	566	24816252	2014	Metabolic	Lipid::Short chain fatty acid::valerate	0.043354	4102
AGTR1-Genome wide association study ATLAS.csv	1002	27989323	2017	Immunological	Monokine induced by interferon-gamma (CXCL9)	0.043623	3685
AGTR1-Genome wide association study ATLAS.csv	2064	28240269	2017	Cell	TIMP1 - Metalloproteinase inhibitor 1	0.043725	1000
AGTR1-Genome wide association study ATLAS.csv	2893	28240269	2017	Cell	PLXNC1 - Plexin-C1	0.044173	1000
AGTR1-Genome wide association study ATLAS.csv	1764	17903304	2007	Cardiovascular	Heart failure (free of MI, FBAT, adjusted for age and sex)	0.044269	1345
AGTR1-Genome wide association study ATLAS.csv	2739	28240269	2017	Cell	IGHE IGK@ IGL@ - Immunoglobulin E	0.044269	1000
AGTR1-Genome wide association study ATLAS.csv	3689	31427789	2019	Psychiatric	Diagnoses - secondary ICD10: F17 Nicotine dependence	0.044309	244890
AGTR1-Genome wide association study ATLAS.csv	4114	29403010	2018	Metabolic	Chloride	0.044651	126402
AGTR1-Genome wide association study ATLAS.csv	263	25772697	2015	Immunological	DNT:%CD127+TEF	0.044659	669
AGTR1-Genome wide association study ATLAS.csv	281	25772697	2015	Immunological	CD8:%Act(25+38+RO+)	0.045432	669
AGTR1-Genome wide association study ATLAS.csv	1958	17903295	2007	Cognitive	MMSE score (at exam 5, FBAT, adjusted for multivariable)	0.045679	913
AGTR1-Genome wide association study ATLAS.csv	3095	28240269	2017	Cell	IL27RA - Interleukin-27 receptor subunit alpha	0.045719	1000
AGTR1-Genome wide association study ATLAS.csv	4586	31676860	2019	Neurological	Right lateral orbitofrontal	0.045773	21821
AGTR1-Genome wide association study ATLAS.csv	36	27629369	2017	Psychiatric	Loneliness (multivariate)	0.04585	7556
AGTR1-Genome wide association study ATLAS.csv	3193	31427789	2019	Social Interactions	Number in household	0.045987	384133
AGTR1-Genome wide association study ATLAS.csv	4438	30053915	2018	Cell	Helicobacter pylori IgG levels	0.046109	175
AGTR1-Genome wide association study ATLAS.csv	3286	31427789	2019	Psychiatric	Irritability	0.046171	369232
AGTR1-Genome wide association study ATLAS.csv	2596	28240269	2017	Cell	FCN1 - Ficolin-1	0.046406	1000
AGTR1-Genome wide association study ATLAS.csv	3845	27863252	2016	Immunological	High light scatter percentage of red cells (two-way meta)	0.04676	130538
AGTR1-Genome wide association study ATLAS.csv	3543	31427789	2019	Ophthalmological	Eye problems/disorders: Cataract	0.046766	127603
AGTR1-Genome wide association study ATLAS.csv	3867	27863252	2016	Immunological	Reticulocyte fraction of red cells (two-way meta)	0.046775	130404
AGTR1-Genome wide association study ATLAS.csv	330	25772697	2015	Immunological	CD4mem:%R6+	0.046874	669
AGTR1-Genome wide association study ATLAS.csv	4559	31676860	2019	Neurological	Left parahippocampal	0.047451	21821
AGTR1-Genome wide association study ATLAS.csv	1167	20081858	2010	Metabolic	HOMA-B	0.047485	36466
AGTR1-Genome wide association study ATLAS.csv	2305	28240269	2017	Cell	CXCL3 CXCL2 - Gro-beta/gamma	0.047647	1000
AGTR1-Genome wide association study ATLAS.csv	1651	17903293	2007	Immunological	Tumor necrosis factor alpha (at exam 7, GEE, adjusted for age and sex)	0.047719	753
AGTR1-Genome wide association study ATLAS.csv	1444	17903299	2007	Metabolic	Low-density lipoprotein cholesterol (at exam 2, FBAT, adjusted for age and sex)	0.047752	1056
AGTR1-Genome wide association study ATLAS.csv	232	25772697	2015	Immunological	mDC (2):%CD1c+	0.047791	669
AGTR1-Genome wide association study ATLAS.csv	1361	17903299	2007	Metabolic	Total cholesterol (at exam 2, GEE, adjusted for age and sex)	0.047927	1069
AGTR1-Genome wide association study ATLAS.csv	1624	17903293	2007	Immunological	Intercellular adhesion molecule-1 (at exam 7, FBAT, adjusted for multivariable)	0.04806	1006
AGTR1-Genome wide association study ATLAS.csv	4605	31676860	2019	Neurological	Right supramarginal	0.048168	21821
AGTR1-Genome wide association study ATLAS.csv	4076	30239722	2018	Metabolic	Body Mass Index (female)	0.048461	434794
AGTR1-Genome wide association study ATLAS.csv	4454	31676860	2019	Neurological	Left lateral orbitofrontal	0.048534	19629
AGTR1-Genome wide association study ATLAS.csv	4108	29403010	2018	Metabolic	Blood urea nitrogen	0.048765	139818
AGTR1-Genome wide association study ATLAS.csv	2610	28240269	2017	Cell	OLR1 - Oxidized low-density lipoprotein receptor 1	0.048773	1000
AGTR1-Genome wide association study ATLAS.csv	1662	17903293	2007	Metabolic	Alanine transaminase (at exam 2, FBAT, adjusted for age and sex)	0.048876	904
AGTR1-Genome wide association study ATLAS.csv	90	26604143	2016	Metabolic	Body Mass Index - Child	0.049383	35668
AGTR1-Genome wide association study ATLAS.csv	325	25772697	2015	Immunological	CD8mem:%"TFH" (2)	0.049512	669
AGTR1-Genome wide association study ATLAS.csv	540	24816252	2014	Metabolic	Lipid::Lysolipid::1-oleoylglycerophosphocholine	0.049555	7812
AGTR1-Genome wide association study ATLAS.csv	3229	31427789	2019	Psychiatric	Getting up in morning	0.049576	385494
AGTR1-Genome wide association study ATLAS.csv	3255	31427789	2019	Nutritional	Tea intake	0.049643	373481
ALDOB-Genome wide association study ATLAS.csv	4121	29403010	2018	Metabolic	Alkaline phosphatase	2.2618e-09	105030
ALDOB-Genome wide association study ATLAS.csv	3845	27863252	2016	Immunological	High light scatter percentage of red cells (two-way meta)	0.00010287	130538
ALDOB-Genome wide association study ATLAS.csv	3846	27863252	2016	Immunological	High light scatter reticulocyte count (two-way meta)	0.0001131	130517
ALDOB-Genome wide association study ATLAS.csv	2097	28240269	2017	Cell	CFI - Complement factor I	0.00030137	1000
ALDOB-Genome wide association study ATLAS.csv	63	28436984	2017	Reproduction	Age at menarche	0.00040297	252514
ALDOB-Genome wide association study ATLAS.csv	3495	31427789	2019	Dermatological	Hair colour (natural, before greying): Blonde	0.00040443	385603
ALDOB-Genome wide association study ATLAS.csv	4282	30804560	2019	Respiratory	FEV1	0.00047389	321047
ALDOB-Genome wide association study ATLAS.csv	3608	31427789	2019	Metabolic	Non-cancer illness code, self-reported: high cholesterol	0.00051517	289307
ALDOB-Genome wide association study ATLAS.csv	3916	28073927	2017	Ophthalmological	Disc area	0.00083442	7307
ALDOB-Genome wide association study ATLAS.csv	3589	31427789	2019	Activities	Types of physical activity in last 4 weeks: Heavy DIY (eg: weeding, lawn mowing, carpentry, digging)	0.00088668	384450
ALDOB-Genome wide association study ATLAS.csv	4278	30804560	2019	Respiratory	FEV1	0.00094524	400102
ALDOB-Genome wide association study ATLAS.csv	1062	19680446	2009	Dermatological	Psoriasis	0.00097333	2716
ALDOB-Genome wide association study ATLAS.csv	4120	29403010	2018	Metabolic	Alanine aminotransferase	0.0010729	134182
ALDOB-Genome wide association study ATLAS.csv	4081	30239722	2018	Metabolic	Waist-hip ratio (adjusted for BMI, male)	0.0011867	315284
ALDOB-Genome wide association study ATLAS.csv	3867	27863252	2016	Immunological	Reticulocyte fraction of red cells (two-way meta)	0.0012797	130404
ALDOB-Genome wide association study ATLAS.csv	3379	31427789	2019	Cardiovascular	Diastolic Blood Pressure (automated reading)	0.0012843	361411
ALDOB-Genome wide association study ATLAS.csv	3187	31427789	2019	Skeletal	Standing height	0.0014688	385748
ALDOB-Genome wide association study ATLAS.csv	3283	31427789	2019	Social Interactions	Number of full sisters	0.0016458	380122
ALDOB-Genome wide association study ATLAS.csv	3866	27863252	2016	Immunological	Reticulocyte count (two-way meta)	0.0019493	130388
ALDOB-Genome wide association study ATLAS.csv	4408	29855537	2018	Reproduction	Vaginal discharge: Itching	0.0020414	11348
ALDOB-Genome wide association study ATLAS.csv	656	24816252	2014	Metabolic	::::X-03088	0.0021696	7474
ALDOB-Genome wide association study ATLAS.csv	3448	31427789	2019	Metabolic	Impedance measures - Impedance of leg (right)	0.0023075	379813
ALDOB-Genome wide association study ATLAS.csv	135	23754948	2013	Metabolic	Waist circumference (female, adjusted for BMI)	0.0024102	45192
ALDOB-Genome wide association study ATLAS.csv	3527	31427789	2019	Environment	Transport type for commuting to job workplace: Cycle	0.0024193	205217
ALDOB-Genome wide association study ATLAS.csv	3698	31427789	2019	Gastrointestinal	Diagnoses - secondary ICD10: K44 Diaphragmatic hernia	0.002672	244890
ALDOB-Genome wide association study ATLAS.csv	3847	27863252	2016	Immunological	Immature fraction of reticulocytes (two-way meta)	0.0029226	130321
ALDOB-Genome wide association study ATLAS.csv	3634	31427789	2019	Environment	Illnesses of father: Diabetes	0.0033009	355137
ALDOB-Genome wide association study ATLAS.csv	3449	31427789	2019	Metabolic	Impedance measures - Impedance of leg (left)	0.0033607	379807
ALDOB-Genome wide association study ATLAS.csv	2037	27723758	2016	Immunological	Immunoglobulin A deficiency	0.0038812	6487
ALDOB-Genome wide association study ATLAS.csv	4281	30804560	2019	Respiratory	PEF	0.0039368	345265
ALDOB-Genome wide association study ATLAS.csv	3242	31427789	2019	Nutritional	Fresh fruit intake	0.0042431	372901
ALDOB-Genome wide association study ATLAS.csv	231	25772697	2015	Immunological	mDC (2):%CD1c-	0.0043857	669
ALDOB-Genome wide association study ATLAS.csv	3403	31427789	2019	Cognitive	Fluid intelligence test - FI5 : family relationship calculation	0.0045043	99934
ALDOB-Genome wide association study ATLAS.csv	232	25772697	2015	Immunological	mDC (2):%CD1c+	0.0046296	669
ALDOB-Genome wide association study ATLAS.csv	1141	27494321	2016	Psychiatric	Chronotype	0.0047021	128266
ALDOB-Genome wide association study ATLAS.csv	3310	31427789	2019	Activities	Age started wearing glasses or contact lenses	0.0047401	332074
ALDOB-Genome wide association study ATLAS.csv	4104	29403010	2018	Metabolic	Total protein	0.0050603	113509
ALDOB-Genome wide association study ATLAS.csv	2744	28240269	2017	Cell	IL7 - Interleukin-7	0.0055333	1000
ALDOB-Genome wide association study ATLAS.csv	3354	31427789	2019	Psychiatric	Age stopped smoking	0.0058995	94873
ALDOB-Genome wide association study ATLAS.csv	133	23754948	2013	Metabolic	Waist circumference (female)	0.0067428	45192
ALDOB-Genome wide association study ATLAS.csv	3280	31427789	2019	Mortality	Mother still alive	0.0074859	379747
ALDOB-Genome wide association study ATLAS.csv	4459	31676860	2019	Neurological	Left paracentral	0.0075722	19629
ALDOB-Genome wide association study ATLAS.csv	322	25772697	2015	Immunological	CD8mem:%"Th1"	0.0075907	669
ALDOB-Genome wide association study ATLAS.csv	4631	31676860	2019	Neurological	Right lateral ventricle	0.0076593	21821
ALDOB-Genome wide association study ATLAS.csv	3881	27863252	2016	Immunological	High light scatter percentage of red cells (three-way meta)	0.0078357	170763
ALDOB-Genome wide association study ATLAS.csv	3568	31427789	2019	Psychiatric	Why stopped smoking: Health precaution	0.0078405	94509
ALDOB-Genome wide association study ATLAS.csv	3365	31427789	2019	Neurological	Back pain for 3+ months	0.0083189	97524
ALDOB-Genome wide association study ATLAS.csv	3430	31427789	2019	Cognitive	Fluid intelligence test - FI8 : chained arithmetic	0.0085968	65220
ALDOB-Genome wide association study ATLAS.csv	4560	31676860	2019	Neurological	Left paracentral	0.0087773	21821
ALDOB-Genome wide association study ATLAS.csv	3501	31427789	2019	Dermatological	Male-specific factors - Hair/balding pattern: Pattern 2	0.0088757	176380
ALDOB-Genome wide association study ATLAS.csv	469	24816252	2014	Metabolic	Lipid::Bile acid metabolism::hyodeoxycholate	0.0090757	6025
ALDOB-Genome wide association study ATLAS.csv	1187	22451204	2012	Neurological	Parkinson disease	0.0090917	8477
ALDOB-Genome wide association study ATLAS.csv	4608	31676860	2019	Neurological	Cerebellar vermal lobules I V	0.0092209	21821
ALDOB-Genome wide association study ATLAS.csv	2311	28240269	2017	Cell	IL1RL2 - Interleukin-1 receptor-like 2	0.0092415	1000
ALDOB-Genome wide association study ATLAS.csv	3758	31427789	2019	Psychiatric	Anxiety - Recent easy annoyance or irritability	0.0096519	126198
ALDOB-Genome wide association study ATLAS.csv	4537	31676860	2019	Neurological	Right pallidum	0.0097234	19629
ALDOB-Genome wide association study ATLAS.csv	2750	28240269	2017	Cell	PAPPA - Pappalysin-1	0.00986	1000
ALDOB-Genome wide association study ATLAS.csv	4285	30804560	2019	Respiratory	PEF	0.0099178	321047
ALDOB-Genome wide association study ATLAS.csv	3678	31427789	2019	Skeletal	Diagnoses - main ICD10: M23 Internal derangement of knee	0.01087	300791
ALDOB-Genome wide association study ATLAS.csv	4304	30664634	2019	Metabolic	Legs-leg fat ratio (female)	0.011194	195068
ALDOB-Genome wide association study ATLAS.csv	3412	31427789	2019	Skeletal	Sitting height	0.011317	385393
ALDOB-Genome wide association study ATLAS.csv	3950	28931804	2017	Neurological	Amyotrophic lateral sclerosis (logistic)	0.011349	4084
ALDOB-Genome wide association study ATLAS.csv	3882	27863252	2016	Immunological	High light scatter reticulocyte count (three-way meta)	0.011613	170761
ALDOB-Genome wide association study ATLAS.csv	2008	24152261	2013	Reproduction	Dapsone hypersensitivity syndrome	0.011785	872
ALDOB-Genome wide association study ATLAS.csv	214	25772697	2015	Immunological	NK:%Term	0.011851	669
ALDOB-Genome wide association study ATLAS.csv	3240	31427789	2019	Nutritional	Cooked vegetable intake	0.011955	374858
ALDOB-Genome wide association study ATLAS.csv	3951	28931804	2017	Neurological	Amyotrophic lateral sclerosis (LMM)	0.012011	4084
ALDOB-Genome wide association study ATLAS.csv	3735	31427789	2019	Psychiatric	Depression - Frequency of depressed days during worst episode of depression	0.012497	69606
ALDOB-Genome wide association study ATLAS.csv	4507	31676860	2019	Neurological	Cerebellar vermal lobules I V	0.012637	19629
ALDOB-Genome wide association study ATLAS.csv	2938	28240269	2017	Cell	F9 - Coagulation factor IX	0.012709	1000
ALDOB-Genome wide association study ATLAS.csv	762	24816252	2014	Metabolic	::::X-12212	0.012818	4566
ALDOB-Genome wide association study ATLAS.csv	2939	28240269	2017	Cell	F10 - Coagulation Factor X	0.012945	1000
ALDOB-Genome wide association study ATLAS.csv	2197	28240269	2017	Cell	HPX - Hemopexin	0.01316	1000
ALDOB-Genome wide association study ATLAS.csv	1004	27989323	2017	Immunological	Macrophage inflammatory protein-1 (CCL4)	0.013466	8243
ALDOB-Genome wide association study ATLAS.csv	3029	28240269	2017	Cell	RB1 - Retinoblastoma-associated protein	0.013507	1000
ALDOB-Genome wide association study ATLAS.csv	50	27798627	2016	Reproduction	Number of children ever born	0.013764	343072
ALDOB-Genome wide association study ATLAS.csv	2860	28240269	2017	Cell	C5 C6 - Complement C5b-C6 complex	0.013899	1000
ALDOB-Genome wide association study ATLAS.csv	4592	31676860	2019	Neurological	Right pars opercularis	0.013977	21821
ALDOB-Genome wide association study ATLAS.csv	308	25772697	2015	Immunological	CD4nv:%Th0	0.014182	669
ALDOB-Genome wide association study ATLAS.csv	494	24816252	2014	Metabolic	Lipid::Fatty acid metabolism (also BCAA metabolism)::butyrylcarnitine	0.014184	7796
ALDOB-Genome wide association study ATLAS.csv	4638	31676860	2019	Neurological	Right pallidum	0.014347	21821
ALDOB-Genome wide association study ATLAS.csv	39	27046643	2016	Cognitive	Memory	0.014441	112067
ALDOB-Genome wide association study ATLAS.csv	676	24816252	2014	Metabolic	::::X-08988	0.014652	7776
ALDOB-Genome wide association study ATLAS.csv	452	24816252	2014	Metabolic	Cofactors and vitamins::Hemoglobin and porphyrin metabolism::heme*	0.014818	6380
ALDOB-Genome wide association study ATLAS.csv	2526	28240269	2017	Cell	IL18R1 - Interleukin-18 receptor 1	0.015207	1000
ALDOB-Genome wide association study ATLAS.csv	3160	28240269	2017	Cell	PIM1 - Serine/threonine-protein kinase pim-1	0.015257	1000
ALDOB-Genome wide association study ATLAS.csv	394	24816252	2014	Metabolic	Amino acid::Phenylalanine & tyrosine metabolism::3-phenylpropionate (hydrocinnamate)	0.01526	6182
ALDOB-Genome wide association study ATLAS.csv	3750	31427789	2019	Psychiatric	Traumatic events - Felt irritable or had angry outbursts in past month	0.015472	57010
ALDOB-Genome wide association study ATLAS.csv	139	23754948	2013	Metabolic	Waist-hip ratio (female)	0.015533	42969
ALDOB-Genome wide association study ATLAS.csv	327	25772697	2015	Immunological	CD4mem:%Th9	0.015582	669
ALDOB-Genome wide association study ATLAS.csv	4588	31676860	2019	Neurological	Right medial orbitofrontal	0.01645	21821
ALDOB-Genome wide association study ATLAS.csv	916	27005778	2016	Metabolic	Total cholesterol in medium LDL	0.016583	21559
ALDOB-Genome wide association study ATLAS.csv	3546	31427789	2019	Body Structures	Mouth/teeth dental problems: Bleeding gums	0.016921	385026
ALDOB-Genome wide association study ATLAS.csv	52	27798627	2016	Reproduction	Number of children ever born (male)	0.017271	103909
ALDOB-Genome wide association study ATLAS.csv	35	27629369	2017	Psychiatric	Loneliness (linear)	0.017276	7556
ALDOB-Genome wide association study ATLAS.csv	3511	31427789	2019	Psychiatric	Reason for reducing amount of alcohol drunk: Other reason	0.017578	142645
ALDOB-Genome wide association study ATLAS.csv	4129	29403010	2018	Immunological	White blood cell count	0.017906	107964
ALDOB-Genome wide association study ATLAS.csv	2015	24369049	2014	Psychiatric	Lithium response in Bipolar I patients - Alda Scale of 4 to 5	0.01837	294
ALDOB-Genome wide association study ATLAS.csv	3868	27863252	2016	Immunological	White blood cell count (two-way meta)	0.018402	131969
ALDOB-Genome wide association study ATLAS.csv	3592	31427789	2019	Activities	Mineral and other dietary supplements: Fish oil (including cod liver oil)	0.018764	385261
ALDOB-Genome wide association study ATLAS.csv	602	24816252	2014	Metabolic	Peptide::gamma-glutamyl::gamma-glutamylglutamine	0.018979	7662
ALDOB-Genome wide association study ATLAS.csv	3195	31427789	2019	Environment	Average total household income before tax	0.019234	332594
ALDOB-Genome wide association study ATLAS.csv	2359	28240269	2017	Cell	IL13 - Interleukin-13	0.019635	1000
ALDOB-Genome wide association study ATLAS.csv	3883	27863252	2016	Immunological	Immature fraction of reticulocytes (three-way meta)	0.019793	170548
ALDOB-Genome wide association study ATLAS.csv	297	25772697	2015	Immunological	CD4mem:%Th22	0.020654	669
ALDOB-Genome wide association study ATLAS.csv	2900	28240269	2017	Cell	ADCYAP1 - Pituitary adenylate cyclase-activating polypeptide 38	0.021279	1000
ALDOB-Genome wide association study ATLAS.csv	2076	28240269	2017	Cell	CXCL16 - C-X-C motif chemokine 16	0.021687	1000
ALDOB-Genome wide association study ATLAS.csv	256	25772697	2015	Immunological	CD32 on 11c+123+DC	0.021882	669
ALDOB-Genome wide association study ATLAS.csv	4410	29855537	2018	Reproduction	Vaginal discharge: Smell	0.02304	11348
ALDOB-Genome wide association study ATLAS.csv	3760	31427789	2019	Psychiatric	Depression - Recent feelings of inadequacy	0.023341	126203
ALDOB-Genome wide association study ATLAS.csv	37	27629369	2017	Psychiatric	Loneliness (case/control)	0.023387	5228
ALDOB-Genome wide association study ATLAS.csv	43	27818178	2016	Environment	Social deprivation	0.02359	112151
ALDOB-Genome wide association study ATLAS.csv	4067	30038396	2018	Cognitive	Cognitive performance	0.024213	257828
ALDOB-Genome wide association study ATLAS.csv	4310	30664745	2019	Skeletal	Osteoarthritis of knee	0.02428	403124
ALDOB-Genome wide association study ATLAS.csv	3686	31427789	2019	Endocrine	Diagnoses - secondary ICD10: E11 Type 2 diabetes mellitus	0.024369	244890
ALDOB-Genome wide association study ATLAS.csv	409	24816252	2014	Metabolic	Amino acid::Tryptophan metabolism::tryptophan	0.024444	7804
ALDOB-Genome wide association study ATLAS.csv	4193	31217584	2019	Cardiovascular	PR interval	0.024599	17422
ALDOB-Genome wide association study ATLAS.csv	4202	31217584	2019	Metabolic	Chronic kidney disease	0.024719	45727
ALDOB-Genome wide association study ATLAS.csv	62	26414677	2015	Reproduction	Age at menopause	0.024972	69360
ALDOB-Genome wide association study ATLAS.csv	2581	28240269	2017	Cell	C1S - Complement C1s subcomponent	0.025068	1000
ALDOB-Genome wide association study ATLAS.csv	125	23754948	2013	Metabolic	Body Mass Index (female)	0.025181	72397
ALDOB-Genome wide association study ATLAS.csv	3848	27863252	2016	Immunological	Lymphocyte count (two-way meta)	0.025426	132452
ALDOB-Genome wide association study ATLAS.csv	2351	28240269	2017	Cell	TNFSF13B - Tumor necrosis factor ligand superfamily member 13B	0.025877	1000
ALDOB-Genome wide association study ATLAS.csv	2873	28240269	2017	Cell	BST1 - ADP-ribosyl cyclase/cyclic ADP-ribose hydrolase 2	0.026434	1000
ALDOB-Genome wide association study ATLAS.csv	4487	31676860	2019	Neurological	Right medial orbitofrontal	0.026617	19629
ALDOB-Genome wide association study ATLAS.csv	3126	28240269	2017	Cell	PDE3A - cGMP-inhibited 3',5'-cyclic phosphodiesterase A	0.028035	1000
ALDOB-Genome wide association study ATLAS.csv	4655	BioRxiv: https://doi.org/10.1101/288563	2019	Neurological	Fornix (column and body of fornix) fractional anisotropy	0.028136	17706
ALDOB-Genome wide association study ATLAS.csv	2017	24369049	2014	Psychiatric	Lithium response in Bipolar I patients - Alda Scale of 6 to 7	0.028509	294
ALDOB-Genome wide association study ATLAS.csv	4642	31676860	2019	Neurological	Right ventral DC	0.02872	21821
ALDOB-Genome wide association study ATLAS.csv	3139	28240269	2017	Cell	F9 - Coagulation factor IXab	0.028929	1000
ALDOB-Genome wide association study ATLAS.csv	3893	27863252	2016	Immunological	Sum neutrophil eosinophil count (three-way meta)	0.029035	170384
ALDOB-Genome wide association study ATLAS.csv	617	24816252	2014	Metabolic	Xenobiotics::Benzoate metabolism::catechol sulfate	0.029111	7807
ALDOB-Genome wide association study ATLAS.csv	3146	28240269	2017	Cell	S100A9 - Protein S100-A9	0.029435	1000
ALDOB-Genome wide association study ATLAS.csv	227	25772697	2015	Immunological	mDC:%CD1c-	0.02958	669
ALDOB-Genome wide association study ATLAS.csv	347	25772697	2015	Immunological	CD8:%TM (1)	0.029955	669
ALDOB-Genome wide association study ATLAS.csv	3069	28240269	2017	Cell	KLRF1 - Killer cell lectin-like receptor subfamily F member 1	0.029992	1000
ALDOB-Genome wide association study ATLAS.csv	4591	31676860	2019	Neurological	Right paracentral	0.03002	21821
ALDOB-Genome wide association study ATLAS.csv	4283	30804560	2019	Respiratory	FVC	0.030635	321047
ALDOB-Genome wide association study ATLAS.csv	3669	31427789	2019	Gastrointestinal	Diagnoses - main ICD10: K21 Gastro-esophageal reflux disease	0.030705	300791
ALDOB-Genome wide association study ATLAS.csv	462	24816252	2014	Metabolic	Energy::Oxidative phosphorylation::acetylphosphate	0.030758	7789
ALDOB-Genome wide association study ATLAS.csv	4753	BioRxiv: https://doi.org/10.1101/288661	2019	Neurological	Superior fronto-occipital fasciculus radial diusivities	0.030905	17706
ALDOB-Genome wide association study ATLAS.csv	4106	29403010	2018	Metabolic	Non-albumin protein	0.031167	98538
ALDOB-Genome wide association study ATLAS.csv	517	24816252	2014	Metabolic	Lipid::Long chain fatty acid::arachidonate (20:4n6)	0.031207	7816
ALDOB-Genome wide association study ATLAS.csv	4279	30804560	2019	Respiratory	FVC	0.031236	400102
ALDOB-Genome wide association study ATLAS.csv	4497	31676860	2019	Neurological	Right precentral	0.031463	19629
ALDOB-Genome wide association study ATLAS.csv	2925	28240269	2017	Cell	SFN - 14-3-3 protein sigma	0.031482	1000
ALDOB-Genome wide association study ATLAS.csv	3821	20190752	2010	Gastrointestinal	Celiac disease	0.031673	15283
ALDOB-Genome wide association study ATLAS.csv	3716	31427789	2019	Mortality	Diagnoses - secondary ICD10: Z95 Presence of cardiac and vascular implants and grafts	0.031831	244890
ALDOB-Genome wide association study ATLAS.csv	587	24816252	2014	Metabolic	Nucleotide::Purine metabolism, urate metabolism::allantoin	0.032113	5705
ALDOB-Genome wide association study ATLAS.csv	3290	31427789	2019	Psychiatric	Worrier / anxious feelings	0.032134	376411
ALDOB-Genome wide association study ATLAS.csv	1147	24699409	2014	Metabolic	Ratio of AUC insulin to AUC glucose	0.032171	4213
ALDOB-Genome wide association study ATLAS.csv	4673	BioRxiv: https://doi.org/10.1101/288581	2019	Neurological	Cingulum (cingulate gyrus) axial diusivities	0.032244	17706
ALDOB-Genome wide association study ATLAS.csv	894	27005778	2016	Metabolic	Free cholesterol in large LDL	0.032433	21555
ALDOB-Genome wide association study ATLAS.csv	229	25772697	2015	Immunological	mDC:%CD1c+	0.032632	669
ALDOB-Genome wide association study ATLAS.csv	3239	31427789	2019	Psychiatric	Exposure to tobacco smoke outside home	0.033184	327794
ALDOB-Genome wide association study ATLAS.csv	892	27005778	2016	Metabolic	Total cholesterol in large LDL	0.033388	21552
ALDOB-Genome wide association study ATLAS.csv	885	27005778	2016	Metabolic	Isoleucine	0.033535	24776
ALDOB-Genome wide association study ATLAS.csv	897	27005778	2016	Metabolic	Phospholipids in large LDL	0.033752	21550
ALDOB-Genome wide association study ATLAS.csv	4048	29534260	2018	Skeletal	Plantar fasciitis	0.033771	102503
ALDOB-Genome wide association study ATLAS.csv	3165	28240269	2017	Cell	LEPR - Leptin receptor	0.034236	1000
ALDOB-Genome wide association study ATLAS.csv	895	27005778	2016	Metabolic	Total lipids in large LDL	0.034265	19273
ALDOB-Genome wide association study ATLAS.csv	4521	31676860	2019	Neurological	Left thalamus proper	0.034272	19629
ALDOB-Genome wide association study ATLAS.csv	2244	28240269	2017	Cell	C5 - C5a anaphylatoxin	0.034445	1000
ALDOB-Genome wide association study ATLAS.csv	2422	28240269	2017	Cell	WFIKKN2 - WAP, Kazal, immunoglobulin, Kunitz and NTR domain-containing protein 2	0.034596	1000
ALDOB-Genome wide association study ATLAS.csv	4474	31676860	2019	Neurological	Left transverse temporal	0.034762	19629
ALDOB-Genome wide association study ATLAS.csv	4222	31015401	2019	Environmental	Beta blocking agents	0.034878	224024
ALDOB-Genome wide association study ATLAS.csv	896	27005778	2016	Metabolic	Concentration of large LDL particles	0.034968	19273
ALDOB-Genome wide association study ATLAS.csv	3997	29500382	2018	Psychiatric	Worrier / anxious feelings (WORRY)	0.035218	264646
ALDOB-Genome wide association study ATLAS.csv	510	24816252	2014	Metabolic	Lipid::Inositol metabolism::chiro-inositol	0.03557	2729
ALDOB-Genome wide association study ATLAS.csv	1000	27989323	2017	Immunological	Macrophage colony-stimulating factor	0.036048	840
ALDOB-Genome wide association study ATLAS.csv	2373	28240269	2017	Cell	IL2RA - Interleukin-2 receptor subunit alpha	0.036063	1000
ALDOB-Genome wide association study ATLAS.csv	908	27005778	2016	Metabolic	LDL diameter	0.036144	19273
ALDOB-Genome wide association study ATLAS.csv	2143	28240269	2017	Cell	PLAUR - Urokinase plasminogen activator surface receptor	0.036538	1000
ALDOB-Genome wide association study ATLAS.csv	918	27005778	2016	Metabolic	Total lipids in medium LDL	0.036793	19273
ALDOB-Genome wide association study ATLAS.csv	377	24816252	2014	Metabolic	Amino acid::Glutathione metabolism::5-oxoproline	0.036816	7802
ALDOB-Genome wide association study ATLAS.csv	114	20935629	2010	Metabolic	Waist-hip ratio (adjusted for BMI)	0.037247	77167
ALDOB-Genome wide association study ATLAS.csv	530	24816252	2014	Metabolic	Lipid::Lysolipid::1-arachidonoylglycerophosphocholine*	0.03746	7507
ALDOB-Genome wide association study ATLAS.csv	258	25772697	2015	Immunological	CD8mem:%CD31+	0.038384	669
ALDOB-Genome wide association study ATLAS.csv	2118	28240269	2017	Cell	ERBB2 - Receptor tyrosine-protein kinase erbB-2	0.038526	1000
ALDOB-Genome wide association study ATLAS.csv	834	24816252	2014	Metabolic	Peptide::Dipeptide::X-14205--alpha-glutamyltyrosine	0.038601	1789
ALDOB-Genome wide association study ATLAS.csv	3744	31427789	2019	Psychiatric	Cannabis use - Ever taken cannabis	0.038973	126632
ALDOB-Genome wide association study ATLAS.csv	2882	28240269	2017	Cell	FUT3 - Galactoside 3(4)-L-fucosyltransferase	0.039342	1000
ALDOB-Genome wide association study ATLAS.csv	2613	28240269	2017	Cell	CD84 - SLAM family member 5	0.039423	1000
ALDOB-Genome wide association study ATLAS.csv	4541	31676860	2019	Neurological	Right ventral DC	0.039621	19629
ALDOB-Genome wide association study ATLAS.csv	917	27005778	2016	Metabolic	Cholesterol esters in medium LDL	0.03982	19273
ALDOB-Genome wide association study ATLAS.csv	3727	31427789	2019	Psychiatric	Anxiety - Ever felt worried, tense, or anxious for most of a month or longer	0.039845	118397
ALDOB-Genome wide association study ATLAS.csv	4622	31676860	2019	Neurological	Left thalamus proper	0.039975	21821
ALDOB-Genome wide association study ATLAS.csv	919	27005778	2016	Metabolic	Concentration of medium LDL particles	0.040124	19273
ALDOB-Genome wide association study ATLAS.csv	4176	30718926	2019	Endocrine	Type 2 Diabetes	0.040573	191764
ALDOB-Genome wide association study ATLAS.csv	4603	31676860	2019	Neurological	Right superior parietal	0.040576	21821
ALDOB-Genome wide association study ATLAS.csv	486	24816252	2014	Metabolic	Lipid::Carnitine metabolism::stearoylcarnitine	0.040646	7183
ALDOB-Genome wide association study ATLAS.csv	248	25772697	2015	Immunological	CD337 on NK early	0.040839	669
ALDOB-Genome wide association study ATLAS.csv	406	24816252	2014	Metabolic	Amino acid::Tryptophan metabolism::indolepropionate	0.040903	7803
ALDOB-Genome wide association study ATLAS.csv	920	27005778	2016	Metabolic	Phospholipids in medium LDL	0.040954	21558
ALDOB-Genome wide association study ATLAS.csv	2983	28240269	2017	Cell	CA2 - Carbonic anhydrase 2	0.041293	1000
ALDOB-Genome wide association study ATLAS.csv	173	25673412	2015	Metabolic	Waist circumference (adjusted for BMI)	0.041331	231355
ALDOB-Genome wide association study ATLAS.csv	174	25673412	2015	Metabolic	Waist circumference (adjusted for BMI)	0.041331	245749
ALDOB-Genome wide association study ATLAS.csv	3300	31427789	2019	Psychiatric	Frequency of tiredness / lethargy in last 2 weeks	0.041466	375053
ALDOB-Genome wide association study ATLAS.csv	3268	31427789	2019	Psychiatric	Alcohol intake versus 10 years previously	0.04152	357907
ALDOB-Genome wide association study ATLAS.csv	893	27005778	2016	Metabolic	Cholesterol esters in large LDL	0.041719	19273
ALDOB-Genome wide association study ATLAS.csv	4665	BioRxiv: https://doi.org/10.1101/288573	2019	Neurological	Superior fronto-occipital fasciculus fractional anisotropy	0.042166	17706
ALDOB-Genome wide association study ATLAS.csv	3232	31427789	2019	Neurological	Sleeplessness / insomnia	0.042487	386078
ALDOB-Genome wide association study ATLAS.csv	4059	27920155	2017	Metabolic	Estimated glomerular filtration rate based on cystain C	0.042609	32861
ALDOB-Genome wide association study ATLAS.csv	779	24816252	2014	Metabolic	::::X-12450	0.042614	6432
ALDOB-Genome wide association study ATLAS.csv	2481	28240269	2017	Cell	ECM1 - Extracellular matrix protein 1	0.04281	1000
ALDOB-Genome wide association study ATLAS.csv	4382	30898391	2019	Neoplasms	Epithelial ovarian cancer (high -grade and low-grade serous)	0.042918	5734
ALDOB-Genome wide association study ATLAS.csv	3472	31427789	2019	Neoplasms	Age at cancer diagnosis	0.042953	61875
ALDOB-Genome wide association study ATLAS.csv	36	27629369	2017	Psychiatric	Loneliness (multivariate)	0.043037	7556
ALDOB-Genome wide association study ATLAS.csv	4280	30804560	2019	Respiratory	FEV1/FVC ratio	0.043191	400102
ALDOB-Genome wide association study ATLAS.csv	2201	28240269	2017	Cell	IL10 - Interleukin-10	0.043466	1000
ALDOB-Genome wide association study ATLAS.csv	141	23754948	2013	Metabolic	Waist-hip ratio (female, adjusted for BMI)	0.044095	42969
ALDOB-Genome wide association study ATLAS.csv	2867	28240269	2017	Cell	MMP12 - Macrophage metalloelastase	0.044301	1000
ALDOB-Genome wide association study ATLAS.csv	2839	28240269	2017	Cell	ENTPD5 - Ectonucleoside triphosphate diphosphohydrolase 5	0.044381	1000
ALDOB-Genome wide association study ATLAS.csv	2633	28240269	2017	Cell	IFNGR1 - Interferon gamma receptor 1	0.044711	1000
ALDOB-Genome wide association study ATLAS.csv	2016	24369049	2014	Psychiatric	Lithium response in Bipolar I patients - Alda Scale of 5 to 6	0.044849	294
ALDOB-Genome wide association study ATLAS.csv	2106	28240269	2017	Cell	VEGFA - Vascular endothelial growth factor A	0.045106	1000
ALDOB-Genome wide association study ATLAS.csv	4166	30108127	2018	Metabolic	Body Mass Index	0.045169	334487
ALDOB-Genome wide association study ATLAS.csv	3519	31427789	2019	Environment	Current employment status: In paid employment or self-employed	0.045344	385138
ALDOB-Genome wide association study ATLAS.csv	2218	28240269	2017	Cell	ADAMTS4 - A disintegrin and metalloproteinase with thrombospondin motifs 4	0.045802	1000
ALDOB-Genome wide association study ATLAS.csv	1148	24699409	2014	Metabolic	AUC insulin	0.045832	4324
ALDOB-Genome wide association study ATLAS.csv	4055	27920155	2017	Metabolic	Estimated glomerular filtration rate based on serum creatinine (non-diabetic)	0.045856	94677
ALDOB-Genome wide association study ATLAS.csv	4050	28358823	2017	Body Structures	Anterior cruciate ligament rupture (fixed effect model)	0.046262	99342
ALDOB-Genome wide association study ATLAS.csv	2755	28240269	2017	Cell	SERPINA3 - alpha-1-antichymotrypsin complex	0.04668	1000
ALDOB-Genome wide association study ATLAS.csv	2325	28240269	2017	Cell	CAST - Calpastatin	0.047045	1000
ALDOB-Genome wide association study ATLAS.csv	4491	31676860	2019	Neurological	Right pars opercularis	0.047047	19629
ALDOB-Genome wide association study ATLAS.csv	3090	28240269	2017	Cell	SIGLEC14 - Sialic acid-binding Ig-like lectin 14	0.047226	1000
ALDOB-Genome wide association study ATLAS.csv	2651	28240269	2017	Cell	TEK - Angiopoietin-1 receptor, soluble	0.047252	1000
ALDOB-Genome wide association study ATLAS.csv	4561	31676860	2019	Neurological	Left pars opercularis	0.047438	21821
ALDOB-Genome wide association study ATLAS.csv	3798	29942085	2018	Psychiatric	Worry subcluster	0.047508	348219
ALDOB-Genome wide association study ATLAS.csv	3471	31427789	2019	Metabolic	Impedance measures - Trunk predicted mass	0.047667	379469
ALDOB-Genome wide association study ATLAS.csv	4530	31676860	2019	Neurological	Right lateral ventricle	0.047723	19629
ALDOB-Genome wide association study ATLAS.csv	3470	31427789	2019	Metabolic	Impedance measures - Trunk fat-free mass	0.047785	379507
ALDOB-Genome wide association study ATLAS.csv	4743	BioRxiv: https://doi.org/10.1101/288651	2019	Neurological	Fornix (column and body of fornix) radial diusivities	0.047793	17706
ALDOB-Genome wide association study ATLAS.csv	3895	27863252	2016	Immunological	Neutrophil count (three-way meta)	0.047845	170702
ALDOB-Genome wide association study ATLAS.csv	4284	30804560	2019	Respiratory	FEV1/FVC ratio	0.047928	321047
ALDOB-Genome wide association study ATLAS.csv	3115	28240269	2017	Cell	PCSK9 - Proprotein convertase subtilisin/kexin type 9	0.048448	1000
ALDOB-Genome wide association study ATLAS.csv	3554	31427789	2019	Activities	Medication for cholesterol, blood pressure, diabetes, or take exogenous hormones: Cholesterol lowering medication	0.048521	207533
ALDOB-Genome wide association study ATLAS.csv	2295	28240269	2017	Cell	BMP7 - Bone morphogenetic protein 7	0.049389	1000
ALDOB-Genome wide association study ATLAS.csv	614	24816252	2014	Metabolic	Xenobiotics::Benzoate metabolism::4-hydroxyhippurate	0.049498	4368
ALDOB-Genome wide association study ATLAS.csv	3166	28240269	2017	Cell	TNFRSF21 - Tumor necrosis factor receptor superfamily member 21	0.049593	1000
APOA1-Genome wide association study ATLAS.csv	4101	29403010	2018	Metabolic	Triglyceride	9.7478e-69	105597
APOA1-Genome wide association study ATLAS.csv	4183	31217584	2019	Metabolic	Triglyceride	1.9193e-36	33096
APOA1-Genome wide association study ATLAS.csv	3608	31427789	2019	Metabolic	Non-cancer illness code, self-reported: high cholesterol	3.1034e-19	289307
APOA1-Genome wide association study ATLAS.csv	4225	31015401	2019	Environmental	HMG CoA reductase inhibitors	3.06e-17	290385
APOA1-Genome wide association study ATLAS.csv	944	27005778	2016	Metabolic	Triglycerides in small VLDL	1.0035e-13	21558
APOA1-Genome wide association study ATLAS.csv	942	27005778	2016	Metabolic	Concentration of small VLDL particles	1.2612e-13	19273
APOA1-Genome wide association study ATLAS.csv	925	27005778	2016	Metabolic	Concentration of medium VLDL particles	1.5701e-13	19273
APOA1-Genome wide association study ATLAS.csv	968	27005778	2016	Metabolic	Triglycerides in very small VLDL	1.6425e-13	19273
APOA1-Genome wide association study ATLAS.csv	943	27005778	2016	Metabolic	Phospholipids in small VLDL	1.7494e-13	21551
APOA1-Genome wide association study ATLAS.csv	4099	29403010	2018	Metabolic	High-density-lipoprotein cholesterol	1.882e-13	70657
APOA1-Genome wide association study ATLAS.csv	941	27005778	2016	Metabolic	Total lipids in small VLDL	2.1757e-13	19273
APOA1-Genome wide association study ATLAS.csv	946	27005778	2016	Metabolic	Serum total triglycerides	2.5651e-13	21545
APOA1-Genome wide association study ATLAS.csv	3554	31427789	2019	Activities	Medication for cholesterol, blood pressure, diabetes, or take exogenous hormones: Cholesterol lowering medication	3.3019e-13	207533
APOA1-Genome wide association study ATLAS.csv	4098	29403010	2018	Metabolic	Total cholesterol	3.6868e-13	128305
APOA1-Genome wide association study ATLAS.csv	935	27005778	2016	Metabolic	Triglycerides in small HDL	5.7085e-13	21558
APOA1-Genome wide association study ATLAS.csv	940	27005778	2016	Metabolic	Free cholesterol in small VLDL	6.1044e-13	21559
APOA1-Genome wide association study ATLAS.csv	924	27005778	2016	Metabolic	Total lipids in medium VLDL	1.0253e-12	19273
APOA1-Genome wide association study ATLAS.csv	926	27005778	2016	Metabolic	Phospholipids in medium VLDL	1.1572e-12	21240
APOA1-Genome wide association study ATLAS.csv	3590	31427789	2019	Activities	Medication for cholesterol, blood pressure or diabetes: Cholesterol lowering medication	1.244e-12	176050
APOA1-Genome wide association study ATLAS.csv	3898	27863252	2016	Immunological	Platelet distribution width (three-way meta)	1.3398e-12	164433
APOA1-Genome wide association study ATLAS.csv	922	27005778	2016	Metabolic	Cholesterol esters in medium VLDL	1.602e-12	19273
APOA1-Genome wide association study ATLAS.csv	905	27005778	2016	Metabolic	18:2, linoleic acid (LA)	1.6456e-12	13527
APOA1-Genome wide association study ATLAS.csv	921	27005778	2016	Metabolic	Total cholesterol in medium VLDL	1.7249e-12	21551
APOA1-Genome wide association study ATLAS.csv	3899	27863252	2016	Immunological	Platelet count (three-way meta)	2.0925e-12	166066
APOA1-Genome wide association study ATLAS.csv	3862	27863252	2016	Immunological	Platelet distribution width (two-way meta)	2.2875e-12	127171
APOA1-Genome wide association study ATLAS.csv	927	27005778	2016	Metabolic	Triglycerides in medium VLDL	2.3831e-12	21241
APOA1-Genome wide association study ATLAS.csv	923	27005778	2016	Metabolic	Free cholesterol in medium VLDL	3.247e-12	21240
APOA1-Genome wide association study ATLAS.csv	902	27005778	2016	Metabolic	Concentration of large VLDL particles	1.5735e-11	18960
APOA1-Genome wide association study ATLAS.csv	4184	31217584	2019	Metabolic	Total cholesterol	1.6168e-11	33185
APOA1-Genome wide association study ATLAS.csv	3921	28334899	2017	Metabolic	Triglycerides cholesterol	3.0183e-11	33566
APOA1-Genome wide association study ATLAS.csv	899	27005778	2016	Metabolic	Cholesterol esters in large VLDL	4.8867e-11	18960
APOA1-Genome wide association study ATLAS.csv	903	27005778	2016	Metabolic	Phospholipids in large VLDL	5.4129e-11	21239
APOA1-Genome wide association study ATLAS.csv	868	27005778	2016	Metabolic	OmegaL6 fatty acids	5.8554e-11	13506
APOA1-Genome wide association study ATLAS.csv	939	27005778	2016	Metabolic	Total cholesterol in small VLDL	7.5143e-11	21557
APOA1-Genome wide association study ATLAS.csv	3863	27863252	2016	Immunological	Platelet count (two-way meta)	8.8871e-11	127127
APOA1-Genome wide association study ATLAS.csv	901	27005778	2016	Metabolic	Total lipids in large VLDL	1.4045e-10	18960
APOA1-Genome wide association study ATLAS.csv	960	27005778	2016	Metabolic	Triglycerides in very large HDL	2.4317e-10	21536
APOA1-Genome wide association study ATLAS.csv	904	27005778	2016	Metabolic	Triglycerides in large VLDL	2.8405e-10	21239
APOA1-Genome wide association study ATLAS.csv	966	27005778	2016	Metabolic	Concentration of very small VLDL particles	3.1708e-10	19273
APOA1-Genome wide association study ATLAS.csv	898	27005778	2016	Metabolic	Total cholesterol in large VLDL	4.6958e-10	21235
APOA1-Genome wide association study ATLAS.csv	855	27005778	2016	Metabolic	ApoB	5.5789e-10	20690
APOA1-Genome wide association study ATLAS.csv	3623	31427789	2019	Activities	Treatment/medication code: atorvastatin	7.3051e-10	280443
APOA1-Genome wide association study ATLAS.csv	884	27005778	2016	Metabolic	Triglycerides in IDL	1.1596e-09	19273
APOA1-Genome wide association study ATLAS.csv	948	27005778	2016	Metabolic	Total fatty acids	1.1855e-09	13505
APOA1-Genome wide association study ATLAS.csv	900	27005778	2016	Metabolic	Free cholesterol in large VLDL	1.226e-09	21238
APOA1-Genome wide association study ATLAS.csv	953	27005778	2016	Metabolic	VLDL diameter	1.3615e-09	19273
APOA1-Genome wide association study ATLAS.csv	965	27005778	2016	Metabolic	Total lipids in very small VLDL	2.0883e-09	19273
APOA1-Genome wide association study ATLAS.csv	4223	31015401	2019	Environmental	Calcium channel blockers	2.4964e-09	204378
APOA1-Genome wide association study ATLAS.csv	3874	27863252	2016	Immunological	Eosinophil count (three-way meta)	5.1854e-09	172275
APOA1-Genome wide association study ATLAS.csv	928	27005778	2016	Metabolic	MonoLunsaturated fatty acids	6.8059e-09	13535
APOA1-Genome wide association study ATLAS.csv	3891	27863252	2016	Immunological	Mean platelet volume (three-way meta)	7.4727e-09	164454
APOA1-Genome wide association study ATLAS.csv	3688	31427789	2019	Metabolic	Diagnoses - secondary ICD10: E78 Disorders of lipoprotein metabolism and other lipidemias	7.6675e-09	244890
APOA1-Genome wide association study ATLAS.csv	4181	31217584	2019	Metabolic	High cholesterol lipoprotein	8.551e-09	33063
APOA1-Genome wide association study ATLAS.csv	3452	31427789	2019	Metabolic	Impedance measures - Leg fat percentage (right)	1.0101e-08	379806
APOA1-Genome wide association study ATLAS.csv	4351	30573740	2018	Dermatological	Male pattern baldness (BOLT LMM infinitesimal mixed model)	1.3024e-08	205327
APOA1-Genome wide association study ATLAS.csv	938	27005778	2016	Metabolic	Concentration of small LDL particles	2.3188e-08	19273
APOA1-Genome wide association study ATLAS.csv	4352	30573740	2018	Dermatological	Male pattern baldness (BOLT LMM non-infinitesimal mixed model)	2.3754e-08	205327
APOA1-Genome wide association study ATLAS.csv	4224	31015401	2019	Environmental	Agents acting on the renin-angiotensin system	2.8151e-08	237530
APOA1-Genome wide association study ATLAS.csv	869	27005778	2016	Metabolic	OmegaL7 and L9 and saturated fatty acids	3.0917e-08	13506
APOA1-Genome wide association study ATLAS.csv	3456	31427789	2019	Metabolic	Impedance measures - Leg fat percentage (left)	3.2891e-08	379786
APOA1-Genome wide association study ATLAS.csv	3873	27863252	2016	Immunological	Sum eosinophil basophil count (three-way meta)	3.6168e-08	171771
APOA1-Genome wide association study ATLAS.csv	3875	27863252	2016	Immunological	Eosinophil percentage of white cells (three-way meta)	6.8444e-08	172378
APOA1-Genome wide association study ATLAS.csv	962	27005778	2016	Metabolic	Concentration of very large VLDL particles	7.9755e-08	18960
APOA1-Genome wide association study ATLAS.csv	4354	30281099	2018	Gastrointestinal	Infantile hypertrophic pyloric stenosis	1.2388e-07	5833
APOA1-Genome wide association study ATLAS.csv	3897	27863252	2016	Immunological	Plateletcrit (three-way meta)	1.3061e-07	164339
APOA1-Genome wide association study ATLAS.csv	3855	27863252	2016	Immunological	Mean platelet volume (two-way meta)	1.6294e-07	127230
APOA1-Genome wide association study ATLAS.csv	945	27005778	2016	Metabolic	Serum total cholesterol	1.6418e-07	21491
APOA1-Genome wide association study ATLAS.csv	3886	27863252	2016	Immunological	Mean corpuscular hemoglobin concentration (three-way meta)	1.8343e-07	172851
APOA1-Genome wide association study ATLAS.csv	3850	27863252	2016	Immunological	Mean corpuscular hemoglobin concentration (two-way meta)	2.7951e-07	132586
APOA1-Genome wide association study ATLAS.csv	3453	31427789	2019	Metabolic	Impedance measures - Leg fat mass (right)	3.247e-07	379802
APOA1-Genome wide association study ATLAS.csv	3876	27863252	2016	Immunological	Eosinophil percentage of granulocytes (three-way meta)	3.8695e-07	170536
APOA1-Genome wide association study ATLAS.csv	937	27005778	2016	Metabolic	Total lipids in small LDL	6.0253e-07	19273
APOA1-Genome wide association study ATLAS.csv	3457	31427789	2019	Metabolic	Impedance measures - Leg fat mass (left)	6.4782e-07	379783
APOA1-Genome wide association study ATLAS.csv	3441	31427789	2019	Metabolic	Impedance measures - Body fat percentage	8.2786e-07	379615
APOA1-Genome wide association study ATLAS.csv	961	27005778	2016	Metabolic	Total lipids in very large VLDL	8.3449e-07	19273
APOA1-Genome wide association study ATLAS.csv	972	27005778	2016	Metabolic	Triglycerides in chylomicrons and extremely large VLDL	8.5431e-07	21540
APOA1-Genome wide association study ATLAS.csv	963	27005778	2016	Metabolic	Phospholipids in very large VLDL	8.6761e-07	21237
APOA1-Genome wide association study ATLAS.csv	3861	27863252	2016	Immunological	Plateletcrit (two-way meta)	1.1937e-06	127033
APOA1-Genome wide association study ATLAS.csv	3838	27863252	2016	Immunological	Eosinophil count (two-way meta)	1.3124e-06	131999
APOA1-Genome wide association study ATLAS.csv	4328	30598549	2018	Skeletal	Estimated bone mineral density from heel ultrasounds	1.4216e-06	426824
APOA1-Genome wide association study ATLAS.csv	964	27005778	2016	Metabolic	Triglycerides in very large VLDL	1.5536e-06	21548
APOA1-Genome wide association study ATLAS.csv	920	27005778	2016	Metabolic	Phospholipids in medium LDL	1.6526e-06	21558
APOA1-Genome wide association study ATLAS.csv	3865	27863252	2016	Immunological	Red cell distribution width (two-way meta)	2.0216e-06	131520
APOA1-Genome wide association study ATLAS.csv	919	27005778	2016	Metabolic	Concentration of medium LDL particles	2.186e-06	19273
APOA1-Genome wide association study ATLAS.csv	3901	27863252	2016	Immunological	Red cell distribution width (three-way meta)	2.2033e-06	171529
APOA1-Genome wide association study ATLAS.csv	936	27005778	2016	Metabolic	Total cholesterol in small LDL	2.3513e-06	21556
APOA1-Genome wide association study ATLAS.csv	3852	27863252	2016	Immunological	Mean corpuscular volume (two-way meta)	2.5964e-06	132353
APOA1-Genome wide association study ATLAS.csv	4283	30804560	2019	Respiratory	FVC	2.8273e-06	321047
APOA1-Genome wide association study ATLAS.csv	4140	29403010	2018	Immunological	Mean corpuscular hemoglobin concentration	2.8538e-06	108728
APOA1-Genome wide association study ATLAS.csv	3613	31427789	2019	Activities	Treatment/medication code: simvastatin	3.0926e-06	280443
APOA1-Genome wide association study ATLAS.csv	949	27005778	2016	Metabolic	Total phosphoglycerides	3.2307e-06	13519
APOA1-Genome wide association study ATLAS.csv	970	27005778	2016	Metabolic	Concentration of chylomicrons and extremely large VLDL particles	3.3913e-06	18960
APOA1-Genome wide association study ATLAS.csv	850	27005778	2016	Metabolic	Acetoacetate	3.4185e-06	19262
APOA1-Genome wide association study ATLAS.csv	4303	30664634	2019	Metabolic	Legs-leg fat ratio (male)	3.812e-06	167431
APOA1-Genome wide association study ATLAS.csv	3442	31427789	2019	Metabolic	Impedance measures - Whole body fat mass	4.4482e-06	379203
APOA1-Genome wide association study ATLAS.csv	3185	31427789	2019	Metabolic	Waist circumference	4.7611e-06	385932
APOA1-Genome wide association study ATLAS.csv	3894	27863252	2016	Immunological	Neutrophil percentage of granulocytes (three-way meta)	5.2768e-06	170672
APOA1-Genome wide association study ATLAS.csv	3464	31427789	2019	Metabolic	Impedance measures - Arm fat percentage (left)	5.2936e-06	379699
APOA1-Genome wide association study ATLAS.csv	967	27005778	2016	Metabolic	Phospholipids in very small VLDL	5.5014e-06	19273
APOA1-Genome wide association study ATLAS.csv	3468	31427789	2019	Metabolic	Impedance measures - Trunk fat percentage	5.6557e-06	379600
APOA1-Genome wide association study ATLAS.csv	3839	27863252	2016	Immunological	Eosinophil percentage of white cells (two-way meta)	7.0533e-06	132052
APOA1-Genome wide association study ATLAS.csv	918	27005778	2016	Metabolic	Total lipids in medium LDL	7.3133e-06	19273
APOA1-Genome wide association study ATLAS.csv	3888	27863252	2016	Immunological	Mean corpuscular volume (three-way meta)	7.5164e-06	172433
APOA1-Genome wide association study ATLAS.csv	3435	31427789	2019	Metabolic	Body Mass Index	8.5292e-06	385336
APOA1-Genome wide association study ATLAS.csv	969	27005778	2016	Metabolic	Total lipids in chylomicrons and extremely large VLDL	9.8395e-06	18960
APOA1-Genome wide association study ATLAS.csv	3900	27863252	2016	Immunological	Red blood cell count (three-way meta)	1.0596e-05	172952
APOA1-Genome wide association study ATLAS.csv	3881	27863252	2016	Immunological	High light scatter percentage of red cells (three-way meta)	1.0688e-05	170763
APOA1-Genome wide association study ATLAS.csv	3460	31427789	2019	Metabolic	Impedance measures - Arm fat percentage (right)	1.0969e-05	379752
APOA1-Genome wide association study ATLAS.csv	3837	27863252	2016	Immunological	Sum eosinophil basophil count (two-way meta)	1.1067e-05	131557
APOA1-Genome wide association study ATLAS.csv	3469	31427789	2019	Metabolic	Impedance measures - Trunk fat mass	1.2176e-05	379578
APOA1-Genome wide association study ATLAS.csv	971	27005778	2016	Metabolic	Phospholipids in chylomicrons and extremely large VLDL	1.5083e-05	21542
APOA1-Genome wide association study ATLAS.csv	4279	30804560	2019	Respiratory	FVC	1.6194e-05	400102
APOA1-Genome wide association study ATLAS.csv	3882	27863252	2016	Immunological	High light scatter reticulocyte count (three-way meta)	1.7345e-05	170761
APOA1-Genome wide association study ATLAS.csv	930	27005778	2016	Metabolic	Phosphatidylcholine and other cholines	1.7435e-05	13542
APOA1-Genome wide association study ATLAS.csv	3867	27863252	2016	Immunological	Reticulocyte fraction of red cells (two-way meta)	1.7831e-05	130404
APOA1-Genome wide association study ATLAS.csv	3445	31427789	2019	Metabolic	Impedance measures - Body Mass Index (BMI)	2.0556e-05	379831
APOA1-Genome wide association study ATLAS.csv	917	27005778	2016	Metabolic	Cholesterol esters in medium LDL	2.0871e-05	19273
APOA1-Genome wide association study ATLAS.csv	3465	31427789	2019	Metabolic	Impedance measures - Arm fat mass (left)	2.4232e-05	379663
APOA1-Genome wide association study ATLAS.csv	4215	31015462	2019	Metabolic	Estimated glomerular filtration rate	2.5925e-05	350504
APOA1-Genome wide association study ATLAS.csv	4175	30048462	2018	Skeletal	Heel bone mineral density	2.9414e-05	394929
APOA1-Genome wide association study ATLAS.csv	3461	31427789	2019	Metabolic	Impedance measures - Arm fat mass (right)	3.2123e-05	379725
APOA1-Genome wide association study ATLAS.csv	882	27005778	2016	Metabolic	Concentration of IDL particles	3.4958e-05	19273
APOA1-Genome wide association study ATLAS.csv	3384	31427789	2019	Environment	Non-accidental death in close genetic family	5.6539e-05	122322
APOA1-Genome wide association study ATLAS.csv	896	27005778	2016	Metabolic	Concentration of large LDL particles	5.7285e-05	19273
APOA1-Genome wide association study ATLAS.csv	4137	29403010	2018	Immunological	Hematocrit	6.0868e-05	108757
APOA1-Genome wide association study ATLAS.csv	854	27005778	2016	Metabolic	ApoA1	6.3788e-05	20687
APOA1-Genome wide association study ATLAS.csv	867	27005778	2016	Metabolic	OmegaL3 fatty acids	7.0143e-05	13544
APOA1-Genome wide association study ATLAS.csv	3866	27863252	2016	Immunological	Reticulocyte count (two-way meta)	8.1203e-05	130388
APOA1-Genome wide association study ATLAS.csv	3845	27863252	2016	Immunological	High light scatter percentage of red cells (two-way meta)	8.3242e-05	130538
APOA1-Genome wide association study ATLAS.csv	3840	27863252	2016	Immunological	Eosinophil percentage of granulocytes (two-way meta)	8.6394e-05	131525
APOA1-Genome wide association study ATLAS.csv	4226	31015401	2019	Environmental	Thyroid preparations	8.9323e-05	305582
APOA1-Genome wide association study ATLAS.csv	3903	27863252	2016	Immunological	Reticulocyte fraction of red cells (three-way meta)	9.5526e-05	170690
APOA1-Genome wide association study ATLAS.csv	95	27680694	2016	Metabolic	Birth weight	0.00010146	153781
APOA1-Genome wide association study ATLAS.csv	4311	30661054	2019	Gastrointestinal	Diverticular disease	0.00012807	451099
APOA1-Genome wide association study ATLAS.csv	881	27005778	2016	Metabolic	Total lipids in IDL	0.000139	19273
APOA1-Genome wide association study ATLAS.csv	3503	31427789	2019	Dermatological	Male-specific factors - Hair/balding pattern: Pattern 4	0.00013968	176380
APOA1-Genome wide association study ATLAS.csv	4074	30239722	2018	Metabolic	Body Mass Index	0.00015646	806834
APOA1-Genome wide association study ATLAS.csv	870	27005778	2016	Metabolic	Free cholesterol	0.00016652	13497
APOA1-Genome wide association study ATLAS.csv	895	27005778	2016	Metabolic	Total lipids in large LDL	0.00017195	19273
APOA1-Genome wide association study ATLAS.csv	3436	31427789	2019	Metabolic	Weight	0.00017229	385473
APOA1-Genome wide association study ATLAS.csv	4305	30664634	2019	Metabolic	Trunk-trunk fat ratio (male)	0.00017315	167431
APOA1-Genome wide association study ATLAS.csv	856	27005778	2016	Metabolic	Ratio of bisLallylic bonds to double bonds in lipids	0.00018658	13524
APOA1-Genome wide association study ATLAS.csv	897	27005778	2016	Metabolic	Phospholipids in large LDL	0.00019242	21550
APOA1-Genome wide association study ATLAS.csv	893	27005778	2016	Metabolic	Cholesterol esters in large LDL	0.00019372	19273
APOA1-Genome wide association study ATLAS.csv	3846	27863252	2016	Immunological	High light scatter reticulocyte count (two-way meta)	0.00019496	130517
APOA1-Genome wide association study ATLAS.csv	908	27005778	2016	Metabolic	LDL diameter	0.00019804	19273
APOA1-Genome wide association study ATLAS.csv	4281	30804560	2019	Respiratory	PEF	0.00020607	345265
APOA1-Genome wide association study ATLAS.csv	3310	31427789	2019	Activities	Age started wearing glasses or contact lenses	0.00021904	332074
APOA1-Genome wide association study ATLAS.csv	916	27005778	2016	Metabolic	Total cholesterol in medium LDL	0.00022588	21559
APOA1-Genome wide association study ATLAS.csv	907	27005778	2016	Metabolic	Total cholesterol in LDL	0.00024944	21559
APOA1-Genome wide association study ATLAS.csv	3902	27863252	2016	Immunological	Reticulocyte count (three-way meta)	0.00028575	170641
APOA1-Genome wide association study ATLAS.csv	3440	31427789	2019	Metabolic	Impedance measures - Weight	0.00029255	379840
APOA1-Genome wide association study ATLAS.csv	4077	30239722	2018	Metabolic	Waist-hip ratio	0.00031122	697734
APOA1-Genome wide association study ATLAS.csv	4285	30804560	2019	Respiratory	PEF	0.00032299	321047
APOA1-Genome wide association study ATLAS.csv	3864	27863252	2016	Immunological	Red blood cell count (two-way meta)	0.00032654	132690
APOA1-Genome wide association study ATLAS.csv	1102	19060910	2009	Metabolic	High-density lipoprotein - Birth cohorts	0.0003305	4763
APOA1-Genome wide association study ATLAS.csv	4282	30804560	2019	Respiratory	FEV1	0.00033279	321047
APOA1-Genome wide association study ATLAS.csv	864	27005778	2016	Metabolic	22:6, docosahexaenoic acid (DHA)	0.00034742	13499
APOA1-Genome wide association study ATLAS.csv	94	27680694	2016	Metabolic	Birth weight	0.00036717	143677
APOA1-Genome wide association study ATLAS.csv	929	27005778	2016	Metabolic	Other polyunsaturated fatty acids than 18:2	0.00037359	13549
APOA1-Genome wide association study ATLAS.csv	883	27005778	2016	Metabolic	Phospholipids in IDL	0.00037665	21559
APOA1-Genome wide association study ATLAS.csv	934	27005778	2016	Metabolic	Concentration of small HDL particles	0.00048233	19273
APOA1-Genome wide association study ATLAS.csv	3577	31427789	2019	Social Interactions	Social support - Leisure/social activities: Pub or social club	0.00048304	385280
APOA1-Genome wide association study ATLAS.csv	3504	31427789	2019	Nutritional	Non-butter spread type details: Flora Pro-Active or Benecol	0.00063215	201144
APOA1-Genome wide association study ATLAS.csv	4201	31217584	2019	Metabolic	Body Mass Index	0.0007328	49335
APOA1-Genome wide association study ATLAS.csv	3187	31427789	2019	Skeletal	Standing height	0.00075169	385748
APOA1-Genome wide association study ATLAS.csv	4066	30038396	2018	Environment	Educational attainment	0.00079296	766345
APOA1-Genome wide association study ATLAS.csv	906	27005778	2016	Metabolic	Lactate	0.00081212	24871
APOA1-Genome wide association study ATLAS.csv	3186	31427789	2019	Metabolic	Hip circumference	0.00086951	385887
APOA1-Genome wide association study ATLAS.csv	3858	27863252	2016	Immunological	Neutrophil percentage of granulocytes (two-way meta)	0.00092741	131660
APOA1-Genome wide association study ATLAS.csv	3691	31427789	2019	Cardiovascular	Diagnoses - secondary ICD10: I10 Essential (primary) hypertension	0.00094404	244890
APOA1-Genome wide association study ATLAS.csv	3879	27863252	2016	Immunological	Hematocrit (three-way meta)	0.00096328	173039
APOA1-Genome wide association study ATLAS.csv	3500	31427789	2019	Dermatological	Male-specific factors - Hair/balding pattern: Pattern 1	0.00096546	176380
APOA1-Genome wide association study ATLAS.csv	4075	30239722	2018	Metabolic	Body Mass Index (male)	0.00111	374756
APOA1-Genome wide association study ATLAS.csv	3843	27863252	2016	Immunological	Hematocrit (two-way meta)	0.0011683	132699
APOA1-Genome wide association study ATLAS.csv	3313	31427789	2019	Ear, Nose, Throat	Hearing difficulty/problems	0.0011818	370713
APOA1-Genome wide association study ATLAS.csv	865	27005778	2016	Metabolic	Esterified cholesterol	0.0011869	13497
APOA1-Genome wide association study ATLAS.csv	879	27005778	2016	Metabolic	Total cholesterol in IDL	0.001199	19273
APOA1-Genome wide association study ATLAS.csv	3253	31427789	2019	Nutritional	Cereal intake	0.0012433	368775
APOA1-Genome wide association study ATLAS.csv	892	27005778	2016	Metabolic	Total cholesterol in large LDL	0.0013324	21552
APOA1-Genome wide association study ATLAS.csv	4121	29403010	2018	Metabolic	Alkaline phosphatase	0.0014365	105030
APOA1-Genome wide association study ATLAS.csv	4495	31676860	2019	Neurological	Right postcentral	0.0015342	19629
APOA1-Genome wide association study ATLAS.csv	2009	23505323	2013	Metabolic	Hypertriglyceridemia	0.001586	2240
APOA1-Genome wide association study ATLAS.csv	4302	30664634	2019	Metabolic	Arms-arm fat ratio (female)	0.0016928	195068
APOA1-Genome wide association study ATLAS.csv	4221	31015401	2019	Environmental	Diuretics	0.0017807	229086
APOA1-Genome wide association study ATLAS.csv	952	27005778	2016	Metabolic	Valine	0.0017951	24900
APOA1-Genome wide association study ATLAS.csv	4513	31676860	2019	Neurological	CSF	0.001803	19629
APOA1-Genome wide association study ATLAS.csv	933	27005778	2016	Metabolic	Total lipids in small HDL	0.0019652	19273
APOA1-Genome wide association study ATLAS.csv	4109	29403010	2018	Metabolic	Serum creatinine	0.0019889	142097
APOA1-Genome wide association study ATLAS.csv	3673	31427789	2019	Gastrointestinal	Diagnoses - main ICD10: K57 Diverticular disease of intestine	0.0019901	300791
APOA1-Genome wide association study ATLAS.csv	3883	27863252	2016	Immunological	Immature fraction of reticulocytes (three-way meta)	0.0020414	170548
APOA1-Genome wide association study ATLAS.csv	3380	31427789	2019	Cardiovascular	Systolic Blood Pressure (automated reading)	0.0020747	361402
APOA1-Genome wide association study ATLAS.csv	3602	31427789	2019	Endocrine	Non-cancer illness code, self-reported: hypothyroidism/myxoedema	0.0022458	289307
APOA1-Genome wide association study ATLAS.csv	4182	31217584	2019	Metabolic	Low cholesterol lipoprotein	0.0022806	32221
APOA1-Genome wide association study ATLAS.csv	4320	30643256	2019	Activities	Positive affect (univariate)	0.0022863	410603
APOA1-Genome wide association study ATLAS.csv	4596	31676860	2019	Neurological	Right postcentral	0.0025213	21821
APOA1-Genome wide association study ATLAS.csv	4278	30804560	2019	Respiratory	FEV1	0.0026975	400102
APOA1-Genome wide association study ATLAS.csv	4358	30177863	2018	Gastrointestinal	Diverticular disease	0.0027769	409728
APOA1-Genome wide association study ATLAS.csv	4722	BioRxiv: https://doi.org/10.1101/288630	2019	Neurological	Fornix (cres) / Stria terminalis mode of anisotropy	0.0027772	17706
APOA1-Genome wide association study ATLAS.csv	4531	31676860	2019	Neurological	Right inferior lateral ventricle	0.0028443	19629
APOA1-Genome wide association study ATLAS.csv	4085	30297969	2018	Endocrine	Type 2 Diabetes	0.0028991	898130
APOA1-Genome wide association study ATLAS.csv	4266	30929738	2019	Respiratory	Asthma (child-onset)	0.0029635	314633
APOA1-Genome wide association study ATLAS.csv	857	27005778	2016	Metabolic	Ratio of bisLallylic bonds to total fatty acids in lipids	0.0031484	13171
APOA1-Genome wide association study ATLAS.csv	4083	28566273	2017	Endocrine	Type 2 Diabetes	0.003197	159208
APOA1-Genome wide association study ATLAS.csv	3648	31427789	2019	Environment	Illnesses of siblings: Heart disease	0.0032214	309116
APOA1-Genome wide association study ATLAS.csv	875	27005778	2016	Metabolic	Glycoprotein acetyls, mainly a1Lacid glycoprotein	0.0032709	19270
APOA1-Genome wide association study ATLAS.csv	3675	31427789	2019	Gastrointestinal	Diagnoses - main ICD10: K80 Cholelithiasis	0.0034185	300791
APOA1-Genome wide association study ATLAS.csv	4084	28566273	2017	Endocrine	Type 2 Diabetes (adjusted for BMI)	0.0034398	159208
APOA1-Genome wide association study ATLAS.csv	4714	BioRxiv: https://doi.org/10.1101/288622	2019	Neurological	Anterior limb of internal capsule mode of anisotropy	0.0035637	17706
APOA1-Genome wide association study ATLAS.csv	3587	31427789	2019	Activities	Types of physical activity in last 4 weeks: Strenuous sports	0.0038685	384450
APOA1-Genome wide association study ATLAS.csv	3887	27863252	2016	Immunological	Mean corpuscular hemoglobin (three-way meta)	0.0039413	172332
APOA1-Genome wide association study ATLAS.csv	3853	27863252	2016	Immunological	Monocyte count (two-way meta)	0.0040497	131544
APOA1-Genome wide association study ATLAS.csv	3404	31427789	2019	Cognitive	Fluid intelligence test - FI6 : conditional arithmetic	0.0043282	96994
APOA1-Genome wide association study ATLAS.csv	1194	21297633	2011	Gastrointestinal	Ulcerative colitis	0.0046516	27994
APOA1-Genome wide association study ATLAS.csv	860	27005778	2016	Metabolic	CH2 groups to double bonds ratio	0.0046652	13532
APOA1-Genome wide association study ATLAS.csv	954	27005778	2016	Metabolic	Total cholesterol in very large HDL	0.0047516	21540
APOA1-Genome wide association study ATLAS.csv	4078	30239722	2018	Metabolic	Waist-hip ratio (male)	0.0048071	316772
APOA1-Genome wide association study ATLAS.csv	876	27005778	2016	Metabolic	Total cholesterol in HDL	0.0048572	21555
APOA1-Genome wide association study ATLAS.csv	3851	27863252	2016	Immunological	Mean corpuscular hemoglobin (two-way meta)	0.0050364	132224
APOA1-Genome wide association study ATLAS.csv	891	27005778	2016	Metabolic	Phospholipids in large HDL	0.0051938	19273
APOA1-Genome wide association study ATLAS.csv	3979	28869591	2017	Skeletal	Estimated BMD	0.0052779	142487
APOA1-Genome wide association study ATLAS.csv	3270	31427789	2019	Metabolic	Comparative body size at age 10	0.0055839	379749
APOA1-Genome wide association study ATLAS.csv	3230	31427789	2019	Psychiatric	Morning/evening person (chronotype)	0.0056217	345148
APOA1-Genome wide association study ATLAS.csv	4660	BioRxiv: https://doi.org/10.1101/288568	2019	Neurological	Posterior limb of internal capsule fractional anisotropy	0.0056291	17706
APOA1-Genome wide association study ATLAS.csv	4632	31676860	2019	Neurological	Right inferior lateral ventricle	0.0057284	21821
APOA1-Genome wide association study ATLAS.csv	3889	27863252	2016	Immunological	Monocyte count (three-way meta)	0.0059472	170721
APOA1-Genome wide association study ATLAS.csv	3789	30804565	2019	Psychiatric	Morningness	0.0066221	345552
APOA1-Genome wide association study ATLAS.csv	888	27005778	2016	Metabolic	Free cholesterol in large HDL	0.0066473	21559
APOA1-Genome wide association study ATLAS.csv	3693	31427789	2019	Cardiovascular	Diagnoses - secondary ICD10: I25 Chronic ischemic heart disease	0.0067826	244890
APOA1-Genome wide association study ATLAS.csv	4662	BioRxiv: https://doi.org/10.1101/288570	2019	Neurological	Retrolenticular part of internal capsule fractional anisotropy	0.0069825	17706
APOA1-Genome wide association study ATLAS.csv	3228	31427789	2019	Psychiatric	Sleep duration	0.0071223	384225
APOA1-Genome wide association study ATLAS.csv	889	27005778	2016	Metabolic	Total lipids in large HDL	0.0071839	19273
APOA1-Genome wide association study ATLAS.csv	3854	27863252	2016	Immunological	Monocyte percentage of white cells (two-way meta)	0.0072237	131305
APOA1-Genome wide association study ATLAS.csv	4006	29559693	2018	Skeletal	Osteoarthritis (hospital diagnosed)	0.0072786	50508
APOA1-Genome wide association study ATLAS.csv	3459	31427789	2019	Metabolic	Impedance measures - Leg predicted mass (left)	0.007435	379761
APOA1-Genome wide association study ATLAS.csv	2030	28067908	2017	Gastrointestinal	Ulcerative colitis	0.0075563	45975
APOA1-Genome wide association study ATLAS.csv	2037	27723758	2016	Immunological	Immunoglobulin A deficiency	0.0075752	6487
APOA1-Genome wide association study ATLAS.csv	3793	30804565	2019	Psychiatric	Sleep duration	0.007625	384317
APOA1-Genome wide association study ATLAS.csv	3458	31427789	2019	Metabolic	Impedance measures - Leg fat-free mass (left)	0.0077071	379766
APOA1-Genome wide association study ATLAS.csv	3198	31427789	2019	Environment	Frequency of travelling from home to job workplace	0.0079633	216647
APOA1-Genome wide association study ATLAS.csv	886	27005778	2016	Metabolic	Total cholesterol in large HDL	0.0080583	21558
APOA1-Genome wide association study ATLAS.csv	3412	31427789	2019	Skeletal	Sitting height	0.0083267	385393
APOA1-Genome wide association study ATLAS.csv	4135	29403010	2018	Immunological	Red blood cell count	0.0084879	108794
APOA1-Genome wide association study ATLAS.csv	3533	31427789	2019	Environment	Mental health - Illness, injury, bereavement, stress in last 2 years: Serious illness, injury or assault of a close relative	0.0085564	383913
APOA1-Genome wide association study ATLAS.csv	4274	30846698	2019	Psychiatric	Short sleep	0.0086235	411934
APOA1-Genome wide association study ATLAS.csv	4110	29403010	2018	Metabolic	Estimated glomerular filtration rate	0.0088568	143658
APOA1-Genome wide association study ATLAS.csv	4316	30643251	2019	Psychiatric	Smoking cessation	0.0089499	312821
APOA1-Genome wide association study ATLAS.csv	4614	31676860	2019	Neurological	CSF	0.0089658	21821
APOA1-Genome wide association study ATLAS.csv	3920	28334899	2017	Metabolic	Total cholesterol	0.0092322	27657
APOA1-Genome wide association study ATLAS.csv	4086	30297969	2018	Endocrine	Type 2 Diabetes (adjusted for BMI)	0.0092638	898130
APOA1-Genome wide association study ATLAS.csv	887	27005778	2016	Metabolic	Cholesterol esters in large HDL	0.0093529	19273
APOA1-Genome wide association study ATLAS.csv	911	27005778	2016	Metabolic	Cholesterol esters in medium HDL	0.0093784	19273
APOA1-Genome wide association study ATLAS.csv	4138	29403010	2018	Immunological	Mean corpuscular volume	0.0094251	108256
APOA1-Genome wide association study ATLAS.csv	3890	27863252	2016	Immunological	Monocyte percentage of white cells (three-way meta)	0.0099998	170494
APOA1-Genome wide association study ATLAS.csv	890	27005778	2016	Metabolic	Concentration of large HDL particles	0.010002	19273
APOA1-Genome wide association study ATLAS.csv	4114	29403010	2018	Metabolic	Chloride	0.010045	126402
APOA1-Genome wide association study ATLAS.csv	3622	31427789	2019	Activities	Treatment/medication code: cod liver oil capsule	0.010167	280443
APOA1-Genome wide association study ATLAS.csv	4309	30664745	2019	Skeletal	Osteoarthritis of hip	0.010219	393873
APOA1-Genome wide association study ATLAS.csv	3553	31427789	2019	Respiratory	Blood clot, DVT, bronchitis, emphysema, asthma, rhinitis, eczema, allergy diagnosed by doctor: Hayfever, allergic rhinitis or eczema	0.010522	385822
APOA1-Genome wide association study ATLAS.csv	880	27005778	2016	Metabolic	Free cholesterol in IDL	0.011178	21559
APOA1-Genome wide association study ATLAS.csv	4272	30846698	2019	Psychiatric	Sleep duration	0.011394	446118
APOA1-Genome wide association study ATLAS.csv	3268	31427789	2019	Psychiatric	Alcohol intake versus 10 years previously	0.011443	357907
APOA1-Genome wide association study ATLAS.csv	3685	31427789	2019	Endocrine	Diagnoses - secondary ICD10: E03 Other hypothyroidism	0.011891	244890
APOA1-Genome wide association study ATLAS.csv	4129	29403010	2018	Immunological	White blood cell count	0.012783	107964
APOA1-Genome wide association study ATLAS.csv	3880	27863252	2016	Immunological	Hemoglobin concentration (three-way meta)	0.012918	172925
APOA1-Genome wide association study ATLAS.csv	4216	31015401	2019	Environmental	Drugs for peptic ulcer and gastro-oesophageal reflux disease (GORD)	0.013277	132367
APOA1-Genome wide association study ATLAS.csv	3878	27863252	2016	Immunological	Granulocyte percentage of myeloid white cells (three-way meta)	0.013613	169545
APOA1-Genome wide association study ATLAS.csv	3276	31427789	2019	Activities	Facial ageing	0.013697	354097
APOA1-Genome wide association study ATLAS.csv	4050	28358823	2017	Body Structures	Anterior cruciate ligament rupture (fixed effect model)	0.013784	99342
APOA1-Genome wide association study ATLAS.csv	3788	30804565	2019	Neurological	Insomnia (female)	0.013847	177817
APOA1-Genome wide association study ATLAS.csv	1064	19488044	2009	Psychiatric	Bipolar disorder	0.01385	2035
APOA1-Genome wide association study ATLAS.csv	3551	31427789	2019	Cardiovascular	Vascular/heart problems diagnosed by doctor: High blood pressure	0.014166	385699
APOA1-Genome wide association study ATLAS.csv	4314	30643251	2019	Psychiatric	Ever smoked regulary	0.014589	262990
APOA1-Genome wide association study ATLAS.csv	859	27005778	2016	Metabolic	CH2 groups in fatty acids	0.014951	19021
APOA1-Genome wide association study ATLAS.csv	3539	31427789	2019	Activities	Reason for glasses/contact lenses: For short-sightedness, i.e. only or mainly for distance viewing such as driving, cinema etc (called 'myopia')	0.014967	78647
APOA1-Genome wide association study ATLAS.csv	3446	31427789	2019	Metabolic	Impedance measures - Basal metabolic rate	0.015151	379821
APOA1-Genome wide association study ATLAS.csv	4177	31217584	2019	Immunological	C-reactive protein	0.015186	28520
APOA1-Genome wide association study ATLAS.csv	3676	31427789	2019	Skeletal	Diagnoses - main ICD10: M16 Osteoarthritis of hip	0.015293	300791
APOA1-Genome wide association study ATLAS.csv	863	27005778	2016	Metabolic	Double bonds in fatty acids	0.015527	15728
APOA1-Genome wide association study ATLAS.csv	4600	31676860	2019	Neurological	Right rostral anterior cingulate	0.015622	21821
APOA1-Genome wide association study ATLAS.csv	4187	31217584	2019	Immunological	HbA1c	0.01585	11178
APOA1-Genome wide association study ATLAS.csv	4218	31015401	2019	Environmental	Antithrombotic agents	0.016397	153639
APOA1-Genome wide association study ATLAS.csv	4728	BioRxiv: https://doi.org/10.1101/288636	2019	Neurological	Retrolenticular part of internal capsule mode of anisotropy	0.01653	17706
APOA1-Genome wide association study ATLAS.csv	3190	31427789	2019	Mortality	Number of self-reported non-cancer illnesses	0.016664	386581
APOA1-Genome wide association study ATLAS.csv	3498	31427789	2019	Dermatological	Hair colour (natural, before greying): Dark brown	0.017013	385603
APOA1-Genome wide association study ATLAS.csv	3379	31427789	2019	Cardiovascular	Diastolic Blood Pressure (automated reading)	0.01708	361411
APOA1-Genome wide association study ATLAS.csv	3665	31427789	2019	Neoplasms	Diagnoses - main ICD10: C44 Other and unspecified malignant neoplasm of skin	0.017768	300791
APOA1-Genome wide association study ATLAS.csv	2052	26691988	2016	Ophthalmological	Age-related Macular Degeneration	0.017772	33976
APOA1-Genome wide association study ATLAS.csv	3786	30804565	2019	Neurological	Insomnia	0.017777	386533
APOA1-Genome wide association study ATLAS.csv	3454	31427789	2019	Metabolic	Impedance measures - Leg fat-free mass (right)	0.018153	379793
APOA1-Genome wide association study ATLAS.csv	4369	30367059	2018	Endocrine	Thyroid-stimulating hormone	0.018474	54288
APOA1-Genome wide association study ATLAS.csv	3455	31427789	2019	Metabolic	Impedance measures - Leg predicted mass (right)	0.018575	379793
APOA1-Genome wide association study ATLAS.csv	3620	31427789	2019	Activities	Treatment/medication code: amlodipine	0.018726	280443
APOA1-Genome wide association study ATLAS.csv	3257	31427789	2019	Nutritional	Hot drink temperature	0.019002	382329
APOA1-Genome wide association study ATLAS.csv	3396	31427789	2019	Activities	Other sociodemographic factors - Private healthcare	0.019035	128472
APOA1-Genome wide association study ATLAS.csv	3451	31427789	2019	Metabolic	Impedance measures - Impedance of arm (left)	0.01914	379803
APOA1-Genome wide association study ATLAS.csv	4014	29700475	2018	Psychiatric	Major depressive disorder	0.019219	173005
APOA1-Genome wide association study ATLAS.csv	4382	30898391	2019	Neoplasms	Epithelial ovarian cancer (high -grade and low-grade serous)	0.019416	5734
APOA1-Genome wide association study ATLAS.csv	4290	30804566	2019	Neurological	Frequent insomnia symptoms	0.019677	237627
APOA1-Genome wide association study ATLAS.csv	894	27005778	2016	Metabolic	Free cholesterol in large LDL	0.020015	21555
APOA1-Genome wide association study ATLAS.csv	3191	31427789	2019	Activities	Number of treatments/medications taken	0.020468	386581
APOA1-Genome wide association study ATLAS.csv	4112	29403010	2018	Metabolic	Sodium	0.020496	127304
APOA1-Genome wide association study ATLAS.csv	3681	31427789	2019	Respiratory	Diagnoses - main ICD10: R07 Pain in throat and chest	0.02081	300791
APOA1-Genome wide association study ATLAS.csv	4499	31676860	2019	Neurological	Right rostral anterior cingulate	0.020845	19629
APOA1-Genome wide association study ATLAS.csv	4136	29403010	2018	Hematological	Hemoglobin	0.020852	108769
APOA1-Genome wide association study ATLAS.csv	4079	30239722	2018	Metabolic	Waist-hip ratio (female)	0.020878	381152
APOA1-Genome wide association study ATLAS.csv	3437	31427789	2019	Respiratory	Doctor diagnosed hayfever or allergic rhinitis	0.021496	97640
APOA1-Genome wide association study ATLAS.csv	4694	BioRxiv: https://doi.org/10.1101/288602	2019	Neurological	Body of corpus callosum mean diusivities	0.021625	17706
APOA1-Genome wide association study ATLAS.csv	4496	31676860	2019	Neurological	Right posterior cingulate	0.021905	19629
APOA1-Genome wide association study ATLAS.csv	3304	31427789	2019	Reproduction	Age first had sexual intercourse	0.021941	339614
APOA1-Genome wide association study ATLAS.csv	4220	31015401	2019	Environmental	Antihypertensives	0.022069	152380
APOA1-Genome wide association study ATLAS.csv	3410	31427789	2019	Mortality	Interpolated Year when non-cancer illness first diagnosed	0.022094	277734
APOA1-Genome wide association study ATLAS.csv	3411	31427789	2019	Mortality	Interpolated Age of participant when non-cancer illness first diagnosed	0.02215	277734
APOA1-Genome wide association study ATLAS.csv	3624	31427789	2019	Activities	Treatment/medication code: glucosamine product	0.022237	280443
APOA1-Genome wide association study ATLAS.csv	910	27005778	2016	Metabolic	Total cholesterol in medium HDL	0.022372	21558
APOA1-Genome wide association study ATLAS.csv	3492	31427789	2019	Nutritional	Coffee type: Decaffeinated coffee (any type)	0.022939	303811
APOA1-Genome wide association study ATLAS.csv	3376	31427789	2019	Reproduction	Number of stillbirths (female)	0.022972	65639
APOA1-Genome wide association study ATLAS.csv	3197	31427789	2019	Environment	Length of working week for main job	0.022977	217750
APOA1-Genome wide association study ATLAS.csv	4267	30929738	2019	Respiratory	Asthma (adult-onset)	0.023371	327253
APOA1-Genome wide association study ATLAS.csv	4411	30053915	2018	Cell	Total IgG levels	0.023737	1000
APOA1-Genome wide association study ATLAS.csv	4128	29403010	2018	Metabolic	C-reactive protein	0.023911	75391
APOA1-Genome wide association study ATLAS.csv	4063	28452372	2017	Metabolic	Estimated glomerular filtration rate based on serum creatinine	0.023973	110527
APOA1-Genome wide association study ATLAS.csv	4231	31015401	2019	Environmental	Salicylic acid and derivatives	0.024011	112010
APOA1-Genome wide association study ATLAS.csv	2023	24934506	2014	Endocrine	Skin fluorescence	0.024286	1082
APOA1-Genome wide association study ATLAS.csv	3591	31427789	2019	Activities	Medication for cholesterol, blood pressure or diabetes: Blood pressure medication	0.024368	176050
APOA1-Genome wide association study ATLAS.csv	852	27005778	2016	Metabolic	Alanine	0.024403	24796
APOA1-Genome wide association study ATLAS.csv	4205	31152163	2019	Metabolic	Estimated glomerular filtration rate	0.024741	765348
APOA1-Genome wide association study ATLAS.csv	956	27005778	2016	Metabolic	Free cholesterol in very large HDL	0.025099	21542
APOA1-Genome wide association study ATLAS.csv	4730	BioRxiv: https://doi.org/10.1101/288638	2019	Neurological	Superior corona radiata mode of anisotropy	0.025297	17706
APOA1-Genome wide association study ATLAS.csv	4597	31676860	2019	Neurological	Right posterior cingulate	0.025336	21821
APOA1-Genome wide association study ATLAS.csv	3638	31427789	2019	Environment	Illnesses of mother: Heart disease	0.025435	367939
APOA1-Genome wide association study ATLAS.csv	4313	30643251	2019	Psychiatric	Age of initiation of regular smoking	0.025493	632802
APOA1-Genome wide association study ATLAS.csv	15	28439101	2017	Psychiatric	Posttraumatic stress disorder	0.025952	9223
APOA1-Genome wide association study ATLAS.csv	3603	31427789	2019	Neurological	Non-cancer illness code, self-reported: migraine	0.026014	289307
APOA1-Genome wide association study ATLAS.csv	4376	30367059	2018	Endocrine	Hypothyroidism	0.026049	53423
APOA1-Genome wide association study ATLAS.csv	3337	31427789	2019	Activities	Years since last breast cancer screening / mammogram (female)	0.026599	162926
APOA1-Genome wide association study ATLAS.csv	4377	30940143	2019	Cardiovascular	Resting heart rate	0.026649	458969
APOA1-Genome wide association study ATLAS.csv	4131	29403010	2018	Immunological	Eosinophil count	0.026919	62076
APOA1-Genome wide association study ATLAS.csv	4111	29403010	2018	Metabolic	Uric acid	0.027377	109029
APOA1-Genome wide association study ATLAS.csv	4081	30239722	2018	Metabolic	Waist-hip ratio (adjusted for BMI, male)	0.027698	315284
APOA1-Genome wide association study ATLAS.csv	69	26192919	2015	Gastrointestinal	Ulcerative Colitis	0.027851	27432
APOA1-Genome wide association study ATLAS.csv	3188	31427789	2019	Cardiovascular	Pulse rate (automated reading)	0.027962	361411
APOA1-Genome wide association study ATLAS.csv	4682	BioRxiv: https://doi.org/10.1101/288590	2019	Neurological	Posterior limb of internal capsule axial diusivities	0.027969	17706
APOA1-Genome wide association study ATLAS.csv	955	27005778	2016	Metabolic	Cholesterol esters in very large HDL	0.02884	19273
APOA1-Genome wide association study ATLAS.csv	3842	27863252	2016	Immunological	Granulocyte percentage of myeloid white cells (two-way meta)	0.029499	130543
APOA1-Genome wide association study ATLAS.csv	4383	30898391	2019	Neoplasms	Epithelial ovarian cancer (high-grade serous)	0.029627	5698
APOA1-Genome wide association study ATLAS.csv	5	21926972	2011	Psychiatric	Bipolar disorder	0.029676	16731
APOA1-Genome wide association study ATLAS.csv	3945	28898252	2017	Metabolic	HbA1c	0.02968	8874
APOA1-Genome wide association study ATLAS.csv	4280	30804560	2019	Respiratory	FEV1/FVC ratio	0.030468	400102
APOA1-Genome wide association study ATLAS.csv	3746	31427789	2019	Psychiatric	Happiness and subjective well-being - General happiness with own health	0.03065	126477
APOA1-Genome wide association study ATLAS.csv	3481	31427789	2019	Nutritional	Milk type used: Semi-skimmed	0.030688	373135
APOA1-Genome wide association study ATLAS.csv	4627	31676860	2019	Neurological	Left amygdala	0.030962	21821
APOA1-Genome wide association study ATLAS.csv	3222	31427789	2019	Activities	Drive faster than motorway speed limit	0.031203	349848
APOA1-Genome wide association study ATLAS.csv	4656	BioRxiv: https://doi.org/10.1101/288564	2019	Neurological	Fornix (cres) / Stria terminalis fractional anisotropy	0.031276	17706
APOA1-Genome wide association study ATLAS.csv	4051	28358823	2017	Body Structures	Anterior cruciate ligament rupture (random effect model)	0.03173	99342
APOA1-Genome wide association study ATLAS.csv	3217	31427789	2019	Activities	Time spend outdoors in summer	0.031794	350364
APOA1-Genome wide association study ATLAS.csv	3844	27863252	2016	Immunological	Hemoglobin concentration (two-way meta)	0.033628	132596
APOA1-Genome wide association study ATLAS.csv	3560	31427789	2019	Activities	Medication for pain relief, constipation, heartburn: Omeprazole (e.g. Zanprol)	0.033803	382089
APOA1-Genome wide association study ATLAS.csv	3444	31427789	2019	Metabolic	Impedance measures - Whole body water mass	0.033969	379835
APOA1-Genome wide association study ATLAS.csv	4100	29403010	2018	Metabolic	Low-density-lipoprotein cholesterol	0.034876	72866
APOA1-Genome wide association study ATLAS.csv	3204	31427789	2019	Activities	Number of days/week walked 10+ minutes	0.035224	379927
APOA1-Genome wide association study ATLAS.csv	4731	BioRxiv: https://doi.org/10.1101/288639	2019	Neurological	Superior fronto-occipital fasciculus mode of anisotropy	0.03602	17706
APOA1-Genome wide association study ATLAS.csv	3232	31427789	2019	Neurological	Sleeplessness / insomnia	0.03644	386078
APOA1-Genome wide association study ATLAS.csv	4252	30952852	2019	Psychiatric	Number of sleep episodes	0.036463	84810
APOA1-Genome wide association study ATLAS.csv	3287	31427789	2019	Psychiatric	Sensitivity / hurt feelings	0.036676	375272
APOA1-Genome wide association study ATLAS.csv	4663	BioRxiv: https://doi.org/10.1101/288571	2019	Neurological	Splenium of corpus callosum fractional anisotropy	0.037005	17706
APOA1-Genome wide association study ATLAS.csv	3382	31427789	2019	Cognitive	Prospective memory test - Duration screen displayed	0.03709	128912
APOA1-Genome wide association study ATLAS.csv	3314	31427789	2019	Ear, Nose, Throat	Hearing difficulty/problems with background noise	0.037263	378722
APOA1-Genome wide association study ATLAS.csv	3443	31427789	2019	Metabolic	Impedance measures - Whole body fat-free mass	0.037339	379804
APOA1-Genome wide association study ATLAS.csv	3407	31427789	2019	Social Interactions	Number of older siblings	0.037587	111284
APOA1-Genome wide association study ATLAS.csv	4269	30867560	2019	Psychiatric	Neuroticism general factor	0.038375	270059
APOA1-Genome wide association study ATLAS.csv	3993	29500382	2018	Psychiatric	Irritability (IRR)	0.040394	260369
APOA1-Genome wide association study ATLAS.csv	3593	31427789	2019	Activities	Mineral and other dietary supplements: Glucosamine	0.040866	385261
APOA1-Genome wide association study ATLAS.csv	1108	27918534	2017	Metabolic	Subcutaneous adipose tissue volume	0.041	18247
APOA1-Genome wide association study ATLAS.csv	3450	31427789	2019	Metabolic	Impedance measures - Impedance of arm (right)	0.041233	379786
APOA1-Genome wide association study ATLAS.csv	108	26343387	2015	Cardiovascular	Coronary artery disease	0.041261	184305
APOA1-Genome wide association study ATLAS.csv	3918	28334899	2017	Metabolic	High-density lipoprotein cholesterol	0.041469	34374
APOA1-Genome wide association study ATLAS.csv	2058	26743605	2015	Dermatological	Psoriasis	0.0418	2821
APOA1-Genome wide association study ATLAS.csv	3223	31427789	2019	Activities	Length of mobile phone use	0.041863	381616
APOA1-Genome wide association study ATLAS.csv	3283	31427789	2019	Social Interactions	Number of full sisters	0.04194	380122
APOA1-Genome wide association study ATLAS.csv	3439	31427789	2019	Psychiatric	Tobacco smoking	0.042864	97172
APOA1-Genome wide association study ATLAS.csv	4677	BioRxiv: https://doi.org/10.1101/288585	2019	Neurological	Fornix (column and body of fornix) axial diusivities	0.043299	17706
APOA1-Genome wide association study ATLAS.csv	3470	31427789	2019	Metabolic	Impedance measures - Trunk fat-free mass	0.043329	379507
APOA1-Genome wide association study ATLAS.csv	981	27989323	2017	Immunological	Interleukin-10	0.044087	7681
APOA1-Genome wide association study ATLAS.csv	3597	31427789	2019	Cardiovascular	Non-cancer illness code, self-reported: hypertension	0.045015	289307
[truncated: 15,178 more rows]

## Sheet: TableS7.Significant Traits
atlas.ID	PMID	Year	Domain	Trait	P.value	N	Sig	Gene
3187	31427789	2019	Skeletal	Standing height	1.1636e-14	385748	Signi	AAMP
3903	27863252	2016	Immunological	Reticulocyte fraction of red cells (three-way meta)	3.5235e-13	170690	Signi	AAMP
3271	31427789	2019	Skeletal	Comparative height size at age 10	8.5899e-13	380167	Signi	AAMP
3902	27863252	2016	Immunological	Reticulocyte count (three-way meta)	1.6209e-12	170641	Signi	AAMP			atlas.ID	ID in the GWAS Atlas
3881	27863252	2016	Immunological	High light scatter percentage of red cells (three-way meta)	5.1881e-12	170763	Signi	AAMP			PMID	PubMed ID of the publication
3882	27863252	2016	Immunological	High light scatter reticulocyte count (three-way meta)	1.1346e-11	170761	Signi	AAMP			Year	Year of the publication
3889	27863252	2016	Immunological	Monocyte count (three-way meta)	2.0152e-11	170721	Signi	AAMP			Domain	Broader phenotypic category used in GWASAtlas
3865	27863252	2016	Immunological	Red cell distribution width (two-way meta)	2.2462e-10	131520	Signi	AAMP			Trait	Phenotype
3892	27863252	2016	Immunological	Myeloid white cell count (three-way meta)	4.0091e-10	169219	Signi	AAMP			P.value	P-value of the gene for the trait
3872	27863252	2016	Immunological	Sum basophil neutrophil count (three-way meta)	8.5549e-10	170143	Signi	AAMP			N	Sample Size of the study
3895	27863252	2016	Immunological	Neutrophil count (three-way meta)	1.3788e-09	170702	Signi	AAMP			Sig	Bonferroni significant trait for the respective gene (p<1e-5)
3901	27863252	2016	Immunological	Red cell distribution width (three-way meta)	1.6604e-09	171529	Signi	AAMP			Gene	Gene tested
3412	31427789	2019	Skeletal	Sitting height	1.8904e-09	385393	Signi	AAMP
3867	27863252	2016	Immunological	Reticulocyte fraction of red cells (two-way meta)	2.1122e-09	130404	Signi	AAMP
3470	31427789	2019	Metabolic	Impedance measures - Trunk fat-free mass	2.4586e-09	379507	Signi	AAMP
3471	31427789	2019	Metabolic	Impedance measures - Trunk predicted mass	2.6925e-09	379469	Signi	AAMP
3877	27863252	2016	Immunological	Granulocyte count (three-way meta)	4.4112e-09	169822	Signi	AAMP
3845	27863252	2016	Immunological	High light scatter percentage of red cells (two-way meta)	7.0085e-09	130538	Signi	AAMP
3893	27863252	2016	Immunological	Sum neutrophil eosinophil count (three-way meta)	7.5724e-09	170384	Signi	AAMP
3866	27863252	2016	Immunological	Reticulocyte count (two-way meta)	1.0227e-08	130388	Signi	AAMP
3846	27863252	2016	Immunological	High light scatter reticulocyte count (two-way meta)	1.605e-08	130517	Signi	AAMP
3856	27863252	2016	Immunological	Myeloid white cell count (two-way meta)	1.9532e-08	130268	Signi	AAMP
3836	27863252	2016	Immunological	Sum basophil neutrophil count (two-way meta)	2.3512e-08	131031	Signi	AAMP
3380	31427789	2019	Cardiovascular	Systolic Blood Pressure (automated reading)	2.4443e-08	361402	Signi	AAMP
3853	27863252	2016	Immunological	Monocyte count (two-way meta)	2.7412e-08	131544	Signi	AAMP
3904	27863252	2016	Immunological	White blood cell count (three-way meta)	3.8962e-08	172435	Signi	AAMP
3859	27863252	2016	Immunological	Neutrophil count (two-way meta)	4.3374e-08	131564	Signi	AAMP
3841	27863252	2016	Immunological	Granulocyte count (two-way meta)	1.3071e-07	130875	Signi	AAMP
67	26192919	2015	Gastrointestinal	Inflammatory Bowel Disease	1.4093e-07	34652	Signi	AAMP
2031	28067908	2017	Gastrointestinal	Inflammatory Bowel Disease	2.0057e-07	59957	Signi	AAMP
3857	27863252	2016	Immunological	Sum neutrophil eosinophil count (two-way meta)	2.3496e-07	131409	Signi	AAMP
4129	29403010	2018	Immunological	White blood cell count	2.6951e-07	107964	Signi	AAMP
3897	27863252	2016	Immunological	Plateletcrit (three-way meta)	3.2251e-07	164339	Signi	AAMP
3444	31427789	2019	Metabolic	Impedance measures - Whole body water mass	6.2699e-07	379835	Signi	AAMP
3443	31427789	2019	Metabolic	Impedance measures - Whole body fat-free mass	9.172e-07	379804	Signi	AAMP
3899	27863252	2016	Immunological	Platelet count (three-way meta)	1.1962e-06	166066	Signi	AAMP
3868	27863252	2016	Immunological	White blood cell count (two-way meta)	1.783e-06	131969	Signi	AAMP
69	26192919	2015	Gastrointestinal	Ulcerative Colitis	2.2981e-06	27432	Signi	AAMP
3861	27863252	2016	Immunological	Plateletcrit (two-way meta)	4.3728e-06	127033	Signi	AAMP
3885	27863252	2016	Immunological	Lymphocyte percentage of white cells (three-way meta)	4.7081e-06	171748	Signi	AAMP
4175	30048462	2018	Skeletal	Heel bone mineral density	4.8535e-06	394929	Signi	AAMP
3863	27863252	2016	Immunological	Platelet count (two-way meta)	6.2146e-06	127127	Signi	AAMP
835	24816252	2014	Metabolic	Peptide::Dipeptide::X-14208--phenylalanylserine	1.2396e-14	2455	Signi	ACE
833	24816252	2014	Metabolic	Peptide::Dipeptide::X-14189--leucylalanine	1.5502e-14	2745	Signi	ACE
591	24816252	2014	Metabolic	Peptide::Dipeptide::aspartylphenylalanine	2.2727e-13	3948	Signi	ACE
834	24816252	2014	Metabolic	Peptide::Dipeptide::X-14205--alpha-glutamyltyrosine	3.5095e-13	1789	Signi	ACE
836	24816252	2014	Metabolic	Peptide::Dipeptide::X-14304--leucylalanine	3.5198e-13	2434	Signi	ACE
4043	30124842	2018	Skeletal	Height	2.2158e-12	693529	Signi	ACE
3187	31427789	2019	Skeletal	Standing height	4.8886e-12	385748	Signi	ACE
4378	30940143	2019	Cardiovascular	High blood pressure	7.7006e-11	458554	Signi	ACE
3597	31427789	2019	Cardiovascular	Non-cancer illness code, self-reported: hypertension	8.1415e-11	289307	Signi	ACE
3551	31427789	2019	Cardiovascular	Vascular/heart problems diagnosed by doctor: High blood pressure	1.0868e-10	385699	Signi	ACE
4224	31015401	2019	Environmental	Agents acting on the renin-angiotensin system	2.4585e-09	237530	Signi	ACE
832	24816252	2014	Metabolic	::::X-14086	4.2023e-09	2686	Signi	ACE
4094	30617256	2018	Neurological	Proxy and clinically diagnosed Alzheimer's disease	7.2881e-09	455258	Signi	ACE
4085	30297969	2018	Endocrine	Type 2 Diabetes	2.3461e-08	898130	Signi	ACE
4223	31015401	2019	Environmental	Calcium channel blockers	3.285e-07	204378	Signi	ACE
3591	31427789	2019	Activities	Medication for cholesterol, blood pressure or diabetes: Blood pressure medication	4.3887e-07	176050	Signi	ACE
4091	29777097	2018	Neurological	Proxy and clinically diagnosed Alzheimer's disease	4.8117e-07	388324	Signi	ACE
3630	31427789	2019	Environment	Illnesses of father: Lung cancer	1.8272e-06	355137	Signi	ACE
3412	31427789	2019	Skeletal	Sitting height	2.4435e-06	385393	Signi	ACE
4080	30239722	2018	Metabolic	Waist-hip ratio (adjusted for BMI)	3.356e-06	694649	Signi	ACE
3328	31427789	2019	Endocrine	Diabetes (diagnosed by doctor)	4.4018e-06	385420	Signi	ACE
4217	31015401	2019	Environmental	Drugs used in diabetes	4.983e-06	305913	Signi	ACE
4225	31015401	2019	Environmental	HMG CoA reductase inhibitors	8.0789e-06	290385	Signi	ACE
3597	31427789	2019	Cardiovascular	Non-cancer illness code, self-reported: hypertension	1.5586e-14	289307	Signi	AGT
3555	31427789	2019	Activities	Medication for cholesterol, blood pressure, diabetes, or take exogenous hormones: Blood pressure medication	2.8248e-14	207533	Signi	AGT
3551	31427789	2019	Cardiovascular	Vascular/heart problems diagnosed by doctor: High blood pressure	2.9847e-14	385699	Signi	AGT
4378	30940143	2019	Cardiovascular	High blood pressure	5.5234e-14	458554	Signi	AGT
3379	31427789	2019	Cardiovascular	Diastolic Blood Pressure (automated reading)	4.1547e-13	361411	Signi	AGT
3380	31427789	2019	Cardiovascular	Systolic Blood Pressure (automated reading)	6.6919e-11	361402	Signi	AGT
3644	31427789	2019	Environment	Illnesses of mother: High blood pressure	1.8483e-10	367939	Signi	AGT
3691	31427789	2019	Cardiovascular	Diagnoses - secondary ICD10: I10 Essential (primary) hypertension	2.1874e-10	244890	Signi	AGT
4224	31015401	2019	Environmental	Agents acting on the renin-angiotensin system	2.9478e-10	237530	Signi	AGT
4222	31015401	2019	Environmental	Beta blocking agents	7.6882e-10	224024	Signi	AGT
4221	31015401	2019	Environmental	Diuretics	2.6104e-07	229086	Signi	AGT
3617	31427789	2019	Activities	Treatment/medication code: atenolol	6.6465e-07	280443	Signi	AGT
2547	28240269	2017	Cell	AGT - Angiotensinogen	6.6725e-07	1000	Signi	AGT
4121	29403010	2018	Metabolic	Alkaline phosphatase	2.2618e-09	105030	Signi	ALDOB
4101	29403010	2018	Metabolic	Triglyceride	9.7478e-69	105597	Signi	APOA1
4183	31217584	2019	Metabolic	Triglyceride	1.9193e-36	33096	Signi	APOA1
3608	31427789	2019	Metabolic	Non-cancer illness code, self-reported: high cholesterol	3.1034e-19	289307	Signi	APOA1
4225	31015401	2019	Environmental	HMG CoA reductase inhibitors	3.06e-17	290385	Signi	APOA1
944	27005778	2016	Metabolic	Triglycerides in small VLDL	1.0035e-13	21558	Signi	APOA1
942	27005778	2016	Metabolic	Concentration of small VLDL particles	1.2612e-13	19273	Signi	APOA1
925	27005778	2016	Metabolic	Concentration of medium VLDL particles	1.5701e-13	19273	Signi	APOA1
968	27005778	2016	Metabolic	Triglycerides in very small VLDL	1.6425e-13	19273	Signi	APOA1
943	27005778	2016	Metabolic	Phospholipids in small VLDL	1.7494e-13	21551	Signi	APOA1
4099	29403010	2018	Metabolic	High-density-lipoprotein cholesterol	1.882e-13	70657	Signi	APOA1
941	27005778	2016	Metabolic	Total lipids in small VLDL	2.1757e-13	19273	Signi	APOA1
946	27005778	2016	Metabolic	Serum total triglycerides	2.5651e-13	21545	Signi	APOA1
3554	31427789	2019	Activities	Medication for cholesterol, blood pressure, diabetes, or take exogenous hormones: Cholesterol lowering medication	3.3019e-13	207533	Signi	APOA1
4098	29403010	2018	Metabolic	Total cholesterol	3.6868e-13	128305	Signi	APOA1
935	27005778	2016	Metabolic	Triglycerides in small HDL	5.7085e-13	21558	Signi	APOA1
940	27005778	2016	Metabolic	Free cholesterol in small VLDL	6.1044e-13	21559	Signi	APOA1
924	27005778	2016	Metabolic	Total lipids in medium VLDL	1.0253e-12	19273	Signi	APOA1
926	27005778	2016	Metabolic	Phospholipids in medium VLDL	1.1572e-12	21240	Signi	APOA1
3590	31427789	2019	Activities	Medication for cholesterol, blood pressure or diabetes: Cholesterol lowering medication	1.244e-12	176050	Signi	APOA1
3898	27863252	2016	Immunological	Platelet distribution width (three-way meta)	1.3398e-12	164433	Signi	APOA1
922	27005778	2016	Metabolic	Cholesterol esters in medium VLDL	1.602e-12	19273	Signi	APOA1
905	27005778	2016	Metabolic	18:2, linoleic acid (LA)	1.6456e-12	13527	Signi	APOA1
921	27005778	2016	Metabolic	Total cholesterol in medium VLDL	1.7249e-12	21551	Signi	APOA1
3899	27863252	2016	Immunological	Platelet count (three-way meta)	2.0925e-12	166066	Signi	APOA1
3862	27863252	2016	Immunological	Platelet distribution width (two-way meta)	2.2875e-12	127171	Signi	APOA1
927	27005778	2016	Metabolic	Triglycerides in medium VLDL	2.3831e-12	21241	Signi	APOA1
923	27005778	2016	Metabolic	Free cholesterol in medium VLDL	3.247e-12	21240	Signi	APOA1
902	27005778	2016	Metabolic	Concentration of large VLDL particles	1.5735e-11	18960	Signi	APOA1
4184	31217584	2019	Metabolic	Total cholesterol	1.6168e-11	33185	Signi	APOA1
3921	28334899	2017	Metabolic	Triglycerides cholesterol	3.0183e-11	33566	Signi	APOA1
899	27005778	2016	Metabolic	Cholesterol esters in large VLDL	4.8867e-11	18960	Signi	APOA1
903	27005778	2016	Metabolic	Phospholipids in large VLDL	5.4129e-11	21239	Signi	APOA1
868	27005778	2016	Metabolic	OmegaL6 fatty acids	5.8554e-11	13506	Signi	APOA1
939	27005778	2016	Metabolic	Total cholesterol in small VLDL	7.5143e-11	21557	Signi	APOA1
3863	27863252	2016	Immunological	Platelet count (two-way meta)	8.8871e-11	127127	Signi	APOA1
901	27005778	2016	Metabolic	Total lipids in large VLDL	1.4045e-10	18960	Signi	APOA1
960	27005778	2016	Metabolic	Triglycerides in very large HDL	2.4317e-10	21536	Signi	APOA1
904	27005778	2016	Metabolic	Triglycerides in large VLDL	2.8405e-10	21239	Signi	APOA1
966	27005778	2016	Metabolic	Concentration of very small VLDL particles	3.1708e-10	19273	Signi	APOA1
898	27005778	2016	Metabolic	Total cholesterol in large VLDL	4.6958e-10	21235	Signi	APOA1
855	27005778	2016	Metabolic	ApoB	5.5789e-10	20690	Signi	APOA1
3623	31427789	2019	Activities	Treatment/medication code: atorvastatin	7.3051e-10	280443	Signi	APOA1
884	27005778	2016	Metabolic	Triglycerides in IDL	1.1596e-09	19273	Signi	APOA1
948	27005778	2016	Metabolic	Total fatty acids	1.1855e-09	13505	Signi	APOA1
900	27005778	2016	Metabolic	Free cholesterol in large VLDL	1.226e-09	21238	Signi	APOA1
953	27005778	2016	Metabolic	VLDL diameter	1.3615e-09	19273	Signi	APOA1
965	27005778	2016	Metabolic	Total lipids in very small VLDL	2.0883e-09	19273	Signi	APOA1
4223	31015401	2019	Environmental	Calcium channel blockers	2.4964e-09	204378	Signi	APOA1
3874	27863252	2016	Immunological	Eosinophil count (three-way meta)	5.1854e-09	172275	Signi	APOA1
928	27005778	2016	Metabolic	MonoLunsaturated fatty acids	6.8059e-09	13535	Signi	APOA1
3891	27863252	2016	Immunological	Mean platelet volume (three-way meta)	7.4727e-09	164454	Signi	APOA1
3688	31427789	2019	Metabolic	Diagnoses - secondary ICD10: E78 Disorders of lipoprotein metabolism and other lipidemias	7.6675e-09	244890	Signi	APOA1
4181	31217584	2019	Metabolic	High cholesterol lipoprotein	8.551e-09	33063	Signi	APOA1
3452	31427789	2019	Metabolic	Impedance measures - Leg fat percentage (right)	1.0101e-08	379806	Signi	APOA1
4351	30573740	2018	Dermatological	Male pattern baldness (BOLT LMM infinitesimal mixed model)	1.3024e-08	205327	Signi	APOA1
938	27005778	2016	Metabolic	Concentration of small LDL particles	2.3188e-08	19273	Signi	APOA1
4352	30573740	2018	Dermatological	Male pattern baldness (BOLT LMM non-infinitesimal mixed model)	2.3754e-08	205327	Signi	APOA1
4224	31015401	2019	Environmental	Agents acting on the renin-angiotensin system	2.8151e-08	237530	Signi	APOA1
869	27005778	2016	Metabolic	OmegaL7 and L9 and saturated fatty acids	3.0917e-08	13506	Signi	APOA1
3456	31427789	2019	Metabolic	Impedance measures - Leg fat percentage (left)	3.2891e-08	379786	Signi	APOA1
3873	27863252	2016	Immunological	Sum eosinophil basophil count (three-way meta)	3.6168e-08	171771	Signi	APOA1
3875	27863252	2016	Immunological	Eosinophil percentage of white cells (three-way meta)	6.8444e-08	172378	Signi	APOA1
962	27005778	2016	Metabolic	Concentration of very large VLDL particles	7.9755e-08	18960	Signi	APOA1
4354	30281099	2018	Gastrointestinal	Infantile hypertrophic pyloric stenosis	1.2388e-07	5833	Signi	APOA1
3897	27863252	2016	Immunological	Plateletcrit (three-way meta)	1.3061e-07	164339	Signi	APOA1
3855	27863252	2016	Immunological	Mean platelet volume (two-way meta)	1.6294e-07	127230	Signi	APOA1
945	27005778	2016	Metabolic	Serum total cholesterol	1.6418e-07	21491	Signi	APOA1
3886	27863252	2016	Immunological	Mean corpuscular hemoglobin concentration (three-way meta)	1.8343e-07	172851	Signi	APOA1
3850	27863252	2016	Immunological	Mean corpuscular hemoglobin concentration (two-way meta)	2.7951e-07	132586	Signi	APOA1
3453	31427789	2019	Metabolic	Impedance measures - Leg fat mass (right)	3.247e-07	379802	Signi	APOA1
3876	27863252	2016	Immunological	Eosinophil percentage of granulocytes (three-way meta)	3.8695e-07	170536	Signi	APOA1
937	27005778	2016	Metabolic	Total lipids in small LDL	6.0253e-07	19273	Signi	APOA1
3457	31427789	2019	Metabolic	Impedance measures - Leg fat mass (left)	6.4782e-07	379783	Signi	APOA1
3441	31427789	2019	Metabolic	Impedance measures - Body fat percentage	8.2786e-07	379615	Signi	APOA1
961	27005778	2016	Metabolic	Total lipids in very large VLDL	8.3449e-07	19273	Signi	APOA1
972	27005778	2016	Metabolic	Triglycerides in chylomicrons and extremely large VLDL	8.5431e-07	21540	Signi	APOA1
963	27005778	2016	Metabolic	Phospholipids in very large VLDL	8.6761e-07	21237	Signi	APOA1
3861	27863252	2016	Immunological	Plateletcrit (two-way meta)	1.1937e-06	127033	Signi	APOA1
3838	27863252	2016	Immunological	Eosinophil count (two-way meta)	1.3124e-06	131999	Signi	APOA1
4328	30598549	2018	Skeletal	Estimated bone mineral density from heel ultrasounds	1.4216e-06	426824	Signi	APOA1
964	27005778	2016	Metabolic	Triglycerides in very large VLDL	1.5536e-06	21548	Signi	APOA1
920	27005778	2016	Metabolic	Phospholipids in medium LDL	1.6526e-06	21558	Signi	APOA1
3865	27863252	2016	Immunological	Red cell distribution width (two-way meta)	2.0216e-06	131520	Signi	APOA1
919	27005778	2016	Metabolic	Concentration of medium LDL particles	2.186e-06	19273	Signi	APOA1
3901	27863252	2016	Immunological	Red cell distribution width (three-way meta)	2.2033e-06	171529	Signi	APOA1
936	27005778	2016	Metabolic	Total cholesterol in small LDL	2.3513e-06	21556	Signi	APOA1
3852	27863252	2016	Immunological	Mean corpuscular volume (two-way meta)	2.5964e-06	132353	Signi	APOA1
4283	30804560	2019	Respiratory	FVC	2.8273e-06	321047	Signi	APOA1
4140	29403010	2018	Immunological	Mean corpuscular hemoglobin concentration	2.8538e-06	108728	Signi	APOA1
3613	31427789	2019	Activities	Treatment/medication code: simvastatin	3.0926e-06	280443	Signi	APOA1
949	27005778	2016	Metabolic	Total phosphoglycerides	3.2307e-06	13519	Signi	APOA1
970	27005778	2016	Metabolic	Concentration of chylomicrons and extremely large VLDL particles	3.3913e-06	18960	Signi	APOA1
850	27005778	2016	Metabolic	Acetoacetate	3.4185e-06	19262	Signi	APOA1
4303	30664634	2019	Metabolic	Legs-leg fat ratio (male)	3.812e-06	167431	Signi	APOA1
3442	31427789	2019	Metabolic	Impedance measures - Whole body fat mass	4.4482e-06	379203	Signi	APOA1
3185	31427789	2019	Metabolic	Waist circumference	4.7611e-06	385932	Signi	APOA1
3894	27863252	2016	Immunological	Neutrophil percentage of granulocytes (three-way meta)	5.2768e-06	170672	Signi	APOA1
3464	31427789	2019	Metabolic	Impedance measures - Arm fat percentage (left)	5.2936e-06	379699	Signi	APOA1
967	27005778	2016	Metabolic	Phospholipids in very small VLDL	5.5014e-06	19273	Signi	APOA1
3468	31427789	2019	Metabolic	Impedance measures - Trunk fat percentage	5.6557e-06	379600	Signi	APOA1
3839	27863252	2016	Immunological	Eosinophil percentage of white cells (two-way meta)	7.0533e-06	132052	Signi	APOA1
918	27005778	2016	Metabolic	Total lipids in medium LDL	7.3133e-06	19273	Signi	APOA1
3888	27863252	2016	Immunological	Mean corpuscular volume (three-way meta)	7.5164e-06	172433	Signi	APOA1
3435	31427789	2019	Metabolic	Body Mass Index	8.5292e-06	385336	Signi	APOA1
969	27005778	2016	Metabolic	Total lipids in chylomicrons and extremely large VLDL	9.8395e-06	18960	Signi	APOA1
4127	29403010	2018	Metabolic	Lactate dehydrogenase	1.9173e-12	126319	Signi	APOBEC1
4126	29403010	2018	Metabolic	Creatine kinase	3.1406e-12	106080	Signi	APOBEC1
4043	30124842	2018	Skeletal	Height	3.9937e-10	693529	Signi	CALM2
3187	31427789	2019	Skeletal	Standing height	7.1946e-10	385748	Signi	CALM2
3471	31427789	2019	Metabolic	Impedance measures - Trunk predicted mass	5.1313e-07	379469	Signi	CALM2
3470	31427789	2019	Metabolic	Impedance measures - Trunk fat-free mass	5.7913e-07	379507	Signi	CALM2
3412	31427789	2019	Skeletal	Sitting height	1.9758e-06	385393	Signi	CALM2
3271	31427789	2019	Skeletal	Comparative height size at age 10	3.314e-06	380167	Signi	CALM2
3443	31427789	2019	Metabolic	Impedance measures - Whole body fat-free mass	4.0301e-06	379804	Signi	CALM2
3444	31427789	2019	Metabolic	Impedance measures - Whole body water mass	5.8276e-06	379835	Signi	CALM2
3466	31427789	2019	Metabolic	Impedance measures - Arm fat-free mass (left)	6.7889e-06	379653	Signi	CALM2
3467	31427789	2019	Metabolic	Impedance measures - Arm predicted mass (left)	8.1135e-06	379638	Signi	CALM2
2551	28240269	2017	Cell	CAT - Catalase	6.2392e-17	1000	Signi	CAT
4508	31676860	2019	Neurological	Cerebellar vermal lobules VI VII	6.2781e-06	19629	Signi	CAT
2018	24369049	2014	Psychiatric	Lithium response in Bipolar I patients - Alda Scale of 7 to 8	4.3129e-06	294	Signi	CLCA1
2017	24369049	2014	Psychiatric	Lithium response in Bipolar I patients - Alda Scale of 6 to 7	1.0398e-05	294	Signi	CLCA1
3854	27863252	2016	Immunological	Monocyte percentage of white cells (two-way meta)	2.1086e-12	131305	Signi	DEFA5
3842	27863252	2016	Immunological	Granulocyte percentage of myeloid white cells (two-way meta)	3.0754e-12	130543	Signi	DEFA5
3833	27863252	2016	Immunological	Basophil count (two-way meta)	3.2646e-12	131860	Signi	DEFA5
3890	27863252	2016	Immunological	Monocyte percentage of white cells (three-way meta)	1.1705e-11	170494	Signi	DEFA5
3878	27863252	2016	Immunological	Granulocyte percentage of myeloid white cells (three-way meta)	1.3242e-11	169545	Signi	DEFA5
3834	27863252	2016	Immunological	Basophil percentage of white cells (two-way meta)	7.3252e-11	131863	Signi	DEFA5
3869	27863252	2016	Immunological	Basophil count (three-way meta)	2.6142e-09	171846	Signi	DEFA5
3835	27863252	2016	Immunological	Basophil percentage of granulocytes (two-way meta)	4.8125e-09	131536	Signi	DEFA5
3870	27863252	2016	Immunological	Basophil percentage of white cells (three-way meta)	1.651e-07	171996	Signi	DEFA5
3853	27863252	2016	Immunological	Monocyte count (two-way meta)	1.5194e-06	131544	Signi	DEFA5
3871	27863252	2016	Immunological	Basophil percentage of granulocytes (three-way meta)	6.3496e-06	170223	Signi	DEFA5
3273	31427789	2019	Dermatological	Skin colour	8.6395e-99	381433	Signi	DPEP1
3498	31427789	2019	Dermatological	Hair colour (natural, before greying): Dark brown	1.8593e-95	385603	Signi	DPEP1
3274	31427789	2019	Dermatological	Ease of skin tanning	1.8758e-87	378364	Signi	DPEP1
3496	31427789	2019	Dermatological	Hair colour (natural, before greying): Red	9.9138e-76	385603	Signi	DPEP1
3499	31427789	2019	Dermatological	Hair colour (natural, before greying): Black	2.7021e-67	385603	Signi	DPEP1
3315	31427789	2019	Activities	Use of sun/uv protection	2.2496e-59	383659	Signi	DPEP1
3495	31427789	2019	Dermatological	Hair colour (natural, before greying): Blonde	1.5803e-58	385603	Signi	DPEP1
3275	31427789	2019	Activities	Childhood sunburn occasions	2.2106e-42	289412	Signi	DPEP1
3658	31427789	2019	Neoplasms	Cancer register - Type of cancer: ICD10: C44 Other and unspecified malignant neoplasm of skin	1.3457e-22	54696	Signi	DPEP1
3497	31427789	2019	Dermatological	Hair colour (natural, before greying): Light brown	7.4531e-19	385603	Signi	DPEP1
3187	31427789	2019	Skeletal	Standing height	2.8745e-17	385748	Signi	DPEP1
4206	31152163	2019	Metabolic	Estimated glomerular filtration rate	5.787e-15	567460	Signi	DPEP1
3597	31427789	2019	Cardiovascular	Non-cancer illness code, self-reported: hypertension	1.332e-14	289307	Signi	DPEP1
3665	31427789	2019	Neoplasms	Diagnoses - main ICD10: C44 Other and unspecified malignant neoplasm of skin	1.6809e-14	300791	Signi	DPEP1
4378	30940143	2019	Cardiovascular	High blood pressure	2.3303e-14	458554	Signi	DPEP1
3832	27723757	2016	Dermatological	Vitiligo	3.9502e-14	44266	Signi	DPEP1
3551	31427789	2019	Cardiovascular	Vascular/heart problems diagnosed by doctor: High blood pressure	5.6941e-14	385699	Signi	DPEP1
3660	31427789	2019	Neoplasms	Cancer register - Histology of cancer tumour: Basal cell carcinoma, NOS	7.4295e-14	60692	Signi	DPEP1
4224	31015401	2019	Environmental	Agents acting on the renin-angiotensin system	1.1938e-13	237530	Signi	DPEP1
4223	31015401	2019	Environmental	Calcium channel blockers	2.6813e-13	204378	Signi	DPEP1
4205	31152163	2019	Metabolic	Estimated glomerular filtration rate	3.7821e-13	765348	Signi	DPEP1
4043	30124842	2018	Skeletal	Height	6.0517e-13	693529	Signi	DPEP1
4352	30573740	2018	Dermatological	Male pattern baldness (BOLT LMM non-infinitesimal mixed model)	1.178e-12	205327	Signi	DPEP1
3555	31427789	2019	Activities	Medication for cholesterol, blood pressure, diabetes, or take exogenous hormones: Blood pressure medication	1.2805e-12	207533	Signi	DPEP1
4351	30573740	2018	Dermatological	Male pattern baldness (BOLT LMM infinitesimal mixed model)	7.6679e-12	205327	Signi	DPEP1
3271	31427789	2019	Skeletal	Comparative height size at age 10	3.2373e-11	380167	Signi	DPEP1
4222	31015401	2019	Environmental	Beta blocking agents	6.4698e-11	224024	Signi	DPEP1
3324	31427789	2019	Reproduction	Relative age of first facial hair (male)	8.0405e-11	171805	Signi	DPEP1
4221	31015401	2019	Environmental	Diuretics	2.6056e-10	229086	Signi	DPEP1
3189	31427789	2019	Neoplasms	Number of self-reported cancers	2.6104e-09	386581	Signi	DPEP1
3888	27863252	2016	Immunological	Mean corpuscular volume (three-way meta)	2.7005e-09	172433	Signi	DPEP1
3843	27863252	2016	Immunological	Hematocrit (two-way meta)	3.1703e-09	132699	Signi	DPEP1
3500	31427789	2019	Dermatological	Male-specific factors - Hair/balding pattern: Pattern 1	3.4967e-09	176380	Signi	DPEP1
4300	30674883	2019	Dermatological	Vitiligo (early onset)	6.001e-09	9735	Signi	DPEP1
193	26831199	2016	Metabolic	Estimated glomerular filtration rate based on serum creatinine (non-diabetic)	1.1944e-08	118460	Signi	DPEP1
4315	30643251	2019	Psychiatric	Cigarettes per day	1.6102e-08	263954	Signi	DPEP1
3879	27863252	2016	Immunological	Hematocrit (three-way meta)	4.1242e-08	173039	Signi	DPEP1
3379	31427789	2019	Cardiovascular	Diastolic Blood Pressure (automated reading)	4.6239e-08	361411	Signi	DPEP1
3852	27863252	2016	Immunological	Mean corpuscular volume (two-way meta)	7.2167e-08	132353	Signi	DPEP1
191	26831199	2016	Metabolic	Estimated glomerular filtration rate based on serum creatinine	9.0217e-08	113814	Signi	DPEP1
3880	27863252	2016	Immunological	Hemoglobin concentration (three-way meta)	1.1293e-07	172925	Signi	DPEP1
3661	31427789	2019	Neoplasms	Cancer register - Histology of cancer tumour: Adenocarcinoma, NOS	2.1912e-07	60655	Signi	DPEP1
2043	27329760	2016	Psychiatric	Bipolar disorder	4.0308e-07	34950	Signi	DPEP1
4299	30674883	2019	Dermatological	Vitiligo (late onset)	4.586e-07	20623	Signi	DPEP1
3844	27863252	2016	Immunological	Hemoglobin concentration (two-way meta)	4.8864e-07	132596	Signi	DPEP1
4176	30718926	2019	Endocrine	Type 2 Diabetes	5.2003e-07	191764	Signi	DPEP1
4306	30664634	2019	Metabolic	Trunk-trunk fat ratio (female)	6.0769e-07	195068	Signi	DPEP1
3887	27863252	2016	Immunological	Mean corpuscular hemoglobin (three-way meta)	6.7877e-07	172332	Signi	DPEP1
4040	29906448	2018	Psychiatric	Schizophrenia/Bipolar disorder	8.2883e-07	107620	Signi	DPEP1
3329	31427789	2019	Neoplasms	Cancer (diagnosed by doctor)	9.2559e-07	385231	Signi	DPEP1
4304	30664634	2019	Metabolic	Legs-leg fat ratio (female)	1.0141e-06	195068	Signi	DPEP1
3449	31427789	2019	Metabolic	Impedance measures - Impedance of leg (left)	1.2531e-06	379807	Signi	DPEP1
4063	28452372	2017	Metabolic	Estimated glomerular filtration rate based on serum creatinine	1.4061e-06	110527	Signi	DPEP1
3468	31427789	2019	Metabolic	Impedance measures - Trunk fat percentage	1.5437e-06	379600	Signi	DPEP1
3448	31427789	2019	Metabolic	Impedance measures - Impedance of leg (right)	1.5714e-06	379813	Signi	DPEP1
11	25056061	2014	Psychiatric	Schizophrenia	2.9922e-06	82315	Signi	DPEP1
13	24280982	2014	Psychiatric	Schizophrenia vs Bipolar disorder	2.9922e-06	16381	Signi	DPEP1
4216	31015401	2019	Environmental	Drugs for peptic ulcer and gastro-oesophageal reflux disease (GORD)	3.125e-06	132367	Signi	DPEP1
3659	31427789	2019	Neoplasms	Cancer register - Type of cancer: ICD10: C50 Malignant neoplasm of breast	3.132e-06	54778	Signi	DPEP1
3276	31427789	2019	Activities	Facial ageing	3.1532e-06	354097	Signi	DPEP1
3253	31427789	2019	Nutritional	Cereal intake	3.2573e-06	368775	Signi	DPEP1
4738	BioRxiv: https://doi.org/10.1101/288646	2019	Neurological	Body of corpus callosum radial diusivities	3.3972e-06	17706	Signi	DPEP1
4650	BioRxiv: https://doi.org/10.1101/288558	2019	Neurological	Body of corpus callosum fractional anisotropy	3.5978e-06	17706	Signi	DPEP1
4145	29403010	2018	Cardiovascular	Pulse pressure	4.201e-06	136249	Signi	DPEP1
4307	30664745	2019	Skeletal	Osteoarthritis	6.5517e-06	455221	Signi	DPEP1
4253	30952852	2019	Psychiatric	Sleep duration (mean)	7.8902e-06	85449	Signi	DPEP1
4066	30038396	2018	Environment	Educational attainment	2.2045e-12	766345	Signi	DPP4
3785	29942086	2018	Cognitive	Intelligence	5.8321e-11	269867	Signi	DPP4
53	27225129	2016	Environment	Educational attainment	7.4987e-10	328917	Signi	DPP4
4077	30239722	2018	Metabolic	Waist-hip ratio	8.6226e-10	697734	Signi	DPP4
4067	30038396	2018	Cognitive	Cognitive performance	1.2894e-09	257828	Signi	DPP4
3463	31427789	2019	Metabolic	Impedance measures - Arm predicted mass (right)	1.9464e-09	379716	Signi	DPP4
3462	31427789	2019	Metabolic	Impedance measures - Arm fat-free mass (right)	2.2695e-09	379723	Signi	DPP4
3415	31427789	2019	Cognitive	Reaction time test - Mean time to correctly identify matches	3.6601e-09	383748	Signi	DPP4
3446	31427789	2019	Metabolic	Impedance measures - Basal metabolic rate	4.6064e-09	379821	Signi	DPP4
3466	31427789	2019	Metabolic	Impedance measures - Arm fat-free mass (left)	4.6933e-09	379653	Signi	DPP4
3436	31427789	2019	Metabolic	Weight	7.7911e-09	385473	Signi	DPP4
3467	31427789	2019	Metabolic	Impedance measures - Arm predicted mass (left)	7.8976e-09	379638	Signi	DPP4
3443	31427789	2019	Metabolic	Impedance measures - Whole body fat-free mass	1.1995e-08	379804	Signi	DPP4
3444	31427789	2019	Metabolic	Impedance measures - Whole body water mass	1.6863e-08	379835	Signi	DPP4
3470	31427789	2019	Metabolic	Impedance measures - Trunk fat-free mass	1.7503e-08	379507	Signi	DPP4
3440	31427789	2019	Metabolic	Impedance measures - Weight	1.852e-08	379840	Signi	DPP4
3471	31427789	2019	Metabolic	Impedance measures - Trunk predicted mass	2.4482e-08	379469	Signi	DPP4
4078	30239722	2018	Metabolic	Waist-hip ratio (male)	3.1634e-08	316772	Signi	DPP4
4070	BioRxiv: https://doi.org/10.1101/261081	2018	Psychiatric	Ever smoker	3.4299e-08	518633	Signi	DPP4
4038	29906448	2018	Psychiatric	Schizophrenia	6.3065e-08	87491	Signi	DPP4
4074	30239722	2018	Metabolic	Body Mass Index	7.3901e-08	806834	Signi	DPP4
3458	31427789	2019	Metabolic	Impedance measures - Leg fat-free mass (left)	1.0392e-07	379766	Signi	DPP4
4075	30239722	2018	Metabolic	Body Mass Index (male)	1.0672e-07	374756	Signi	DPP4
3459	31427789	2019	Metabolic	Impedance measures - Leg predicted mass (left)	1.0808e-07	379761	Signi	DPP4
4093	29844566	2018	Cognitive	Verbal-numerical reasoning	1.126e-07	168033	Signi	DPP4
4314	30643251	2019	Psychiatric	Ever smoked regulary	1.3599e-07	262990	Signi	DPP4
3185	31427789	2019	Metabolic	Waist circumference	1.5569e-07	385932	Signi	DPP4
3251	31427789	2019	Nutritional	Cheese intake	2.3546e-07	377082	Signi	DPP4
1227	28748955	2017	Mortality	Life span	5.6906e-07	116279	Signi	DPP4
4294	30696823	2019	Psychiatric	Chronotype	6.7887e-07	449732	Signi	DPP4
4295	30696823	2019	Psychiatric	Morning person (binary)	7.5875e-07	403195	Signi	DPP4
3453	31427789	2019	Metabolic	Impedance measures - Leg fat mass (right)	7.626e-07	379802	Signi	DPP4
60	25201988	2014	Environment	Educational attainment	8.9581e-07	106736	Signi	DPP4
3442	31427789	2019	Metabolic	Impedance measures - Whole body fat mass	9.9138e-07	379203	Signi	DPP4
3469	31427789	2019	Metabolic	Impedance measures - Trunk fat mass	1.6855e-06	379578	Signi	DPP4
3455	31427789	2019	Metabolic	Impedance measures - Leg predicted mass (right)	1.7256e-06	379793	Signi	DPP4
3454	31427789	2019	Metabolic	Impedance measures - Leg fat-free mass (right)	1.7745e-06	379793	Signi	DPP4
57	23722424	2013	Environment	Educational attainment	1.985e-06	101069	Signi	DPP4
3654	31427789	2019	Psychiatric	Smoking status: Never	2.4372e-06	384964	Signi	DPP4
3435	31427789	2019	Metabolic	Body Mass Index	3.9802e-06	385336	Signi	DPP4
3457	31427789	2019	Metabolic	Impedance measures - Leg fat mass (left)	4.0976e-06	379783	Signi	DPP4
3320	31427789	2019	Respiratory	Chest pain or discomfort	5.5912e-06	382525	Signi	DPP4
4092	29844566	2018	Cognitive	Reaction time	8.552e-06	330069	Signi	DPP4
3445	31427789	2019	Metabolic	Impedance measures - Body Mass Index (BMI)	9.2894e-06	379831	Signi	DPP4
3892	27863252	2016	Immunological	Myeloid white cell count (three-way meta)	9.4223e-06	169219	Signi	DPP4
3577	31427789	2019	Social Interactions	Social support - Leisure/social activities: Pub or social club	1.0467e-05	385280	Signi	DPP4
4658	BioRxiv: https://doi.org/10.1101/288566	2019	Neurological	Inferior fronto-occipital fasciculus fractional anisotropy	5.6232e-06	17706	Signi	FABP1
482	24816252	2014	Metabolic	Lipid::Carnitine metabolism::laurylcarnitine	5.7127e-06	5170	Signi	FABP1
3448	31427789	2019	Metabolic	Impedance measures - Impedance of leg (right)	2.7473e-26	379813	Signi	FABP2
3449	31427789	2019	Metabolic	Impedance measures - Impedance of leg (left)	8.565e-22	379807	Signi	FABP2
3447	31427789	2019	Metabolic	Impedance measures - Impedance of whole body	8.228e-19	379792	Signi	FABP2
3450	31427789	2019	Metabolic	Impedance measures - Impedance of arm (right)	1.3157e-13	379786	Signi	FABP2
3451	31427789	2019	Metabolic	Impedance measures - Impedance of arm (left)	3.0586e-13	379803	Signi	FABP2
3128	28240269	2017	Cell	PDE5A - cGMP-specific 3',5'-cyclic phosphodiesterase	8.3593e-13	1000	Signi	FABP2
4043	30124842	2018	Skeletal	Height	2.1029e-11	693529	Signi	FABP2
3455	31427789	2019	Metabolic	Impedance measures - Leg predicted mass (right)	3.486e-09	379793	Signi	FABP2
4074	30239722	2018	Metabolic	Body Mass Index	3.9434e-09	806834	Signi	FABP2
3454	31427789	2019	Metabolic	Impedance measures - Leg fat-free mass (right)	4.4376e-09	379793	Signi	FABP2
4306	30664634	2019	Metabolic	Trunk-trunk fat ratio (female)	5.7759e-09	195068	Signi	FABP2
4302	30664634	2019	Metabolic	Arms-arm fat ratio (female)	1.7707e-08	195068	Signi	FABP2
3897	27863252	2016	Immunological	Plateletcrit (three-way meta)	2.8371e-07	164339	Signi	FABP2
3187	31427789	2019	Skeletal	Standing height	2.8565e-07	385748	Signi	FABP2
3868	27863252	2016	Immunological	White blood cell count (two-way meta)	3.2383e-07	131969	Signi	FABP2
3861	27863252	2016	Immunological	Plateletcrit (two-way meta)	3.7475e-07	127033	Signi	FABP2
3458	31427789	2019	Metabolic	Impedance measures - Leg fat-free mass (left)	4.4054e-07	379766	Signi	FABP2
3459	31427789	2019	Metabolic	Impedance measures - Leg predicted mass (left)	5.2686e-07	379761	Signi	FABP2
3856	27863252	2016	Immunological	Myeloid white cell count (two-way meta)	5.7068e-07	130268	Signi	FABP2
3841	27863252	2016	Immunological	Granulocyte count (two-way meta)	7.2865e-07	130875	Signi	FABP2
4075	30239722	2018	Metabolic	Body Mass Index (male)	8.3064e-07	374756	Signi	FABP2
3857	27863252	2016	Immunological	Sum neutrophil eosinophil count (two-way meta)	1.1642e-06	131409	Signi	FABP2
3899	27863252	2016	Immunological	Platelet count (three-way meta)	1.1688e-06	166066	Signi	FABP2
4346	30525989	2018	Cardiovascular	Coronary artery disease and triglyceride (bivariate)	1.176e-06	735838	Signi	FABP2
3444	31427789	2019	Metabolic	Impedance measures - Whole body water mass	1.1829e-06	379835	Signi	FABP2
3882	27863252	2016	Immunological	High light scatter reticulocyte count (three-way meta)	1.3453e-06	170761	Signi	FABP2
3836	27863252	2016	Immunological	Sum basophil neutrophil count (two-way meta)	1.3586e-06	131031	Signi	FABP2
3881	27863252	2016	Immunological	High light scatter percentage of red cells (three-way meta)	1.6951e-06	170763	Signi	FABP2
4348	30525989	2018	Cardiovascular	Coronary artery disease and high-density lipoprotein cholesterol (bivariate)	1.701e-06	735838	Signi	FABP2
3443	31427789	2019	Metabolic	Impedance measures - Whole body fat-free mass	2.2003e-06	379804	Signi	FABP2
3859	27863252	2016	Immunological	Neutrophil count (two-way meta)	2.5678e-06	131564	Signi	FABP2
3904	27863252	2016	Immunological	White blood cell count (three-way meta)	2.7929e-06	172435	Signi	FABP2
3846	27863252	2016	Immunological	High light scatter reticulocyte count (two-way meta)	3.3773e-06	130517	Signi	FABP2
3892	27863252	2016	Immunological	Myeloid white cell count (three-way meta)	3.7171e-06	169219	Signi	FABP2
3845	27863252	2016	Immunological	High light scatter percentage of red cells (two-way meta)	4.753e-06	130538	Signi	FABP2
3445	31427789	2019	Metabolic	Impedance measures - Body Mass Index (BMI)	5.524e-06	379831	Signi	FABP2
3877	27863252	2016	Immunological	Granulocyte count (three-way meta)	6.8933e-06	169822	Signi	FABP2
3435	31427789	2019	Metabolic	Body Mass Index	7.3203e-06	385336	Signi	FABP2
4347	30525989	2018	Cardiovascular	Coronary artery disease and low-density lipoprotein cholesterol (bivariate)	8.7287e-06	735838	Signi	FABP2
4345	30525989	2018	Cardiovascular	Coronary artery disease and total cholesterol (bivariate)	9.4957e-06	735838	Signi	FABP2
4043	30124842	2018	Skeletal	Height	5.9218e-07	693529	Signi	GHRL
4066	30038396	2018	Environment	Educational attainment	7.1985e-06	766345	Signi	GHRL
3187	31427789	2019	Skeletal	Standing height	7.6086e-06	385748	Signi	GHRL
4018	29848360	2018	Skeletal	Systemic Lupus Erythematosus	1.492e-07	10995	Signi	HRAS
3823	26502338	2015	Skeletal	Systemic Lupus Erythematosus	4.9229e-06	14267	Signi	HRAS
3878	27863252	2016	Immunological	Granulocyte percentage of myeloid white cells (three-way meta)	6.8516e-16	169545	Signi	ISYNA1
3842	27863252	2016	Immunological	Granulocyte percentage of myeloid white cells (two-way meta)	1.6287e-14	130543	Signi	ISYNA1
3890	27863252	2016	Immunological	Monocyte percentage of white cells (three-way meta)	2.0504e-14	170494	Signi	ISYNA1
3854	27863252	2016	Immunological	Monocyte percentage of white cells (two-way meta)	3.3274e-14	131305	Signi	ISYNA1
4043	30124842	2018	Skeletal	Height	8.2143e-14	693529	Signi	ISYNA1
3853	27863252	2016	Immunological	Monocyte count (two-way meta)	8.6582e-12	131544	Signi	ISYNA1
4328	30598549	2018	Skeletal	Estimated bone mineral density from heel ultrasounds	1.104e-11	426824	Signi	ISYNA1
3187	31427789	2019	Skeletal	Standing height	3.4898e-11	385748	Signi	ISYNA1
3889	27863252	2016	Immunological	Monocyte count (three-way meta)	3.6298e-10	170721	Signi	ISYNA1
3896	27863252	2016	Immunological	Neutrophil percentage of white cells (three-way meta)	1.4821e-09	171542	Signi	ISYNA1
3879	27863252	2016	Immunological	Hematocrit (three-way meta)	8.4436e-09	173039	Signi	ISYNA1
4175	30048462	2018	Skeletal	Heel bone mineral density	9.5456e-09	394929	Signi	ISYNA1
511	24816252	2014	Metabolic	Lipid::Inositol metabolism::myo-inositol	1.0194e-08	7803	Signi	ISYNA1
3843	27863252	2016	Immunological	Hematocrit (two-way meta)	2.4698e-08	132699	Signi	ISYNA1
3412	31427789	2019	Skeletal	Sitting height	5.9163e-08	385393	Signi	ISYNA1
3219	31427789	2019	Activities	Time spent watching television (TV)	7.584e-08	365236	Signi	ISYNA1
4647	BioRxiv: https://doi.org/10.1101/288555	2019	Neurological	Anterior corona radiata fractional anisotropy	9.9102e-08	17706	Signi	ISYNA1
3860	27863252	2016	Immunological	Neutrophil percentage of white cells (two-way meta)	1.9075e-07	132352	Signi	ISYNA1
3530	31427789	2019	Nutritional	Never eat eggs, dairy, wheat, sugar: Sugar or foods/drinks containing sugar	2.0407e-07	384986	Signi	ISYNA1
3229	31427789	2019	Psychiatric	Getting up in morning	2.4241e-07	385494	Signi	ISYNA1
3791	30804565	2019	Psychiatric	Ease of getting up in the morning	4.8855e-07	385949	Signi	ISYNA1
3531	31427789	2019	Nutritional	Never eat eggs, dairy, wheat, sugar: I eat all of the above	5.1232e-07	384986	Signi	ISYNA1
3880	27863252	2016	Immunological	Hemoglobin concentration (three-way meta)	6.2393e-07	172925	Signi	ISYNA1
3304	31427789	2019	Reproduction	Age first had sexual intercourse	8.3548e-07	339614	Signi	ISYNA1
3864	27863252	2016	Immunological	Red blood cell count (two-way meta)	1.572e-06	132690	Signi	ISYNA1
3844	27863252	2016	Immunological	Hemoglobin concentration (two-way meta)	2.2599e-06	132596	Signi	ISYNA1
3300	31427789	2019	Psychiatric	Frequency of tiredness / lethargy in last 2 weeks	2.5596e-06	375053	Signi	ISYNA1
4080	30239722	2018	Metabolic	Waist-hip ratio (adjusted for BMI)	3.3967e-06	694649	Signi	ISYNA1
3437	31427789	2019	Respiratory	Doctor diagnosed hayfever or allergic rhinitis	4.9179e-06	97640	Signi	ISYNA1
3872	27863252	2016	Immunological	Sum basophil neutrophil count (three-way meta)	4.9268e-06	170143	Signi	ISYNA1
4071	BioRxiv: https://doi.org/10.1101/261081	2018	Reproduction	Number of sexual partners	6.393e-06	370711	Signi	ISYNA1
4639	31676860	2019	Neurological	Right hippocampus	1.0337e-05	21821	Signi	ISYNA1
4361	30061737	2018	Cardiovascular	Atrial fibrillation	4.4724e-11	1030836	Signi	KDM3A
4044	30124842	2018	Metabolic	Body Mass Index	1.1182e-10	681275	Signi	KDM3A
4268	29892015	2018	Cardiovascular	Atrial Fibrillation	8.4185e-10	588190	Signi	KDM3A
4074	30239722	2018	Metabolic	Body Mass Index	8.7738e-10	806834	Signi	KDM3A
3417	31427789	2019	Psychiatric	Neuroticism score	1.0653e-09	312740	Signi	KDM3A
3798	29942085	2018	Psychiatric	Worry subcluster	3.0126e-09	348219	Signi	KDM3A
3990	29500382	2018	Psychiatric	Neuroticism sum score	1.105e-08	380506	Signi	KDM3A
4043	30124842	2018	Skeletal	Height	1.2498e-08	693529	Signi	KDM3A
3291	31427789	2019	Psychiatric	Tense / 'highly strung'	2.2598e-08	374129	Signi	KDM3A
3998	29500382	2018	Psychiatric	Tense / 'highly strung' (TENSE)	2.7764e-08	263635	Signi	KDM3A
3795	29942085	2018	Psychiatric	Neuroticism	3.2183e-08	390278	Signi	KDM3A
3186	31427789	2019	Metabolic	Hip circumference	3.8358e-08	385887	Signi	KDM3A
3435	31427789	2019	Metabolic	Body Mass Index	4.0741e-08	385336	Signi	KDM3A
3445	31427789	2019	Metabolic	Impedance measures - Body Mass Index (BMI)	6.6088e-08	379831	Signi	KDM3A
4327	30643256	2019	Psychiatric	Well-being spectrum	7.5972e-08	2311184	Signi	KDM3A
3449	31427789	2019	Metabolic	Impedance measures - Impedance of leg (left)	3.8512e-07	379807	Signi	KDM3A
4270	30867560	2019	Psychiatric	Anxiety/tension factors	4.6549e-07	270059	Signi	KDM3A
4271	30867560	2019	Psychiatric	Worry/vulnerability factors	4.6549e-07	270059	Signi	KDM3A
3436	31427789	2019	Metabolic	Weight	4.8034e-07	385473	Signi	KDM3A
3256	31427789	2019	Nutritional	Coffee intake	5.5914e-07	358093	Signi	KDM3A
3993	29500382	2018	Psychiatric	Irritability (IRR)	6.0072e-07	260369	Signi	KDM3A
3459	31427789	2019	Metabolic	Impedance measures - Leg predicted mass (left)	6.3179e-07	379761	Signi	KDM3A
3286	31427789	2019	Psychiatric	Irritability	7.2094e-07	369232	Signi	KDM3A
3458	31427789	2019	Metabolic	Impedance measures - Leg fat-free mass (left)	7.7419e-07	379766	Signi	KDM3A
3289	31427789	2019	Psychiatric	Nervous feelings	1.1361e-06	376368	Signi	KDM3A
3446	31427789	2019	Metabolic	Impedance measures - Basal metabolic rate	1.3012e-06	379821	Signi	KDM3A
3440	31427789	2019	Metabolic	Impedance measures - Weight	1.3074e-06	379840	Signi	KDM3A
4325	30643256	2019	Psychiatric	Neuroticism (MA GWAMA)	1.7516e-06	523783	Signi	KDM3A
3443	31427789	2019	Metabolic	Impedance measures - Whole body fat-free mass	1.7576e-06	379804	Signi	KDM3A
4326	30643256	2019	Psychiatric	Depressive symptoms (MA GWAMA)	1.8144e-06	1067913	Signi	KDM3A
4322	30643256	2019	Psychiatric	Depressive symptoms (univariate)	1.9835e-06	1067913	Signi	KDM3A
4293	30718901	2019	Psychiatric	Depression	2.0132e-06	500199	Signi	KDM3A
3444	31427789	2019	Metabolic	Impedance measures - Whole body water mass	2.2659e-06	379835	Signi	KDM3A
3460	31427789	2019	Metabolic	Impedance measures - Arm fat percentage (right)	2.3578e-06	379752	Signi	KDM3A
3996	29500382	2018	Psychiatric	Nervous feelings (NERV-FEEL)	2.529e-06	264858	Signi	KDM3A
3447	31427789	2019	Metabolic	Impedance measures - Impedance of whole body	2.5432e-06	379792	Signi	KDM3A
3694	31427789	2019	Cardiovascular	Diagnoses - secondary ICD10: I48 Atrial fibrillation and flutter	2.5881e-06	244890	Signi	KDM3A
4321	30643256	2019	Psychiatric	Neuroticism (univariate)	2.8591e-06	523783	Signi	KDM3A
3471	31427789	2019	Metabolic	Impedance measures - Trunk predicted mass	3.1547e-06	379469	Signi	KDM3A
3461	31427789	2019	Metabolic	Impedance measures - Arm fat mass (right)	3.5306e-06	379725	Signi	KDM3A
3467	31427789	2019	Metabolic	Impedance measures - Arm predicted mass (left)	4.437e-06	379638	Signi	KDM3A
3301	31427789	2019	Psychiatric	Seen doctor (GP) for nerves, anxiety, tension or depression	4.7054e-06	383771	Signi	KDM3A
3466	31427789	2019	Metabolic	Impedance measures - Arm fat-free mass (left)	5.1474e-06	379653	Signi	KDM3A
3470	31427789	2019	Metabolic	Impedance measures - Trunk fat-free mass	7.4661e-06	379507	Signi	KDM3A
3455	31427789	2019	Metabolic	Impedance measures - Leg predicted mass (right)	7.8376e-06	379793	Signi	KDM3A
4087	29255261	2018	Psychiatric	Neuroticism	7.9259e-06	329821	Signi	KDM3A
3454	31427789	2019	Metabolic	Impedance measures - Leg fat-free mass (right)	8.406e-06	379793	Signi	KDM3A
3290	31427789	2019	Psychiatric	Worrier / anxious feelings	8.4883e-06	376411	Signi	KDM3A
3453	31427789	2019	Metabolic	Impedance measures - Leg fat mass (right)	8.568e-06	379802	Signi	KDM3A
4076	30239722	2018	Metabolic	Body Mass Index (female)	9.5099e-06	434794	Signi	KDM3A
4175	30048462	2018	Skeletal	Heel bone mineral density	2.5353e-39	394929	Signi	LACTB2
4328	30598549	2018	Skeletal	Estimated bone mineral density from heel ultrasounds	1.0784e-35	426824	Signi	LACTB2
3979	28869591	2017	Skeletal	Estimated BMD	3.0495e-14	142487	Signi	LACTB2
3794	30804565	2019	Psychiatric	Snoring	1.6456e-12	359916	Signi	LACTB2
3233	31427789	2019	Psychiatric	Snoring	4.4657e-12	359498	Signi	LACTB2
4080	30239722	2018	Metabolic	Waist-hip ratio (adjusted for BMI)	7.6937e-11	694649	Signi	LACTB2
4082	30239722	2018	Metabolic	Waist-hip ratio (adjusted for BMI, female)	5.63e-09	379501	Signi	LACTB2
4352	30573740	2018	Dermatological	Male pattern baldness (BOLT LMM non-infinitesimal mixed model)	6.3606e-08	205327	Signi	LACTB2
79	22504420	2012	Skeletal	Femoral Neck BMD (females)	1.3804e-07	32961	Signi	LACTB2
4077	30239722	2018	Metabolic	Waist-hip ratio	2.2965e-07	697734	Signi	LACTB2
4278	30804560	2019	Respiratory	FEV1	3.4626e-07	400102	Signi	LACTB2
4351	30573740	2018	Dermatological	Male pattern baldness (BOLT LMM infinitesimal mixed model)	3.5247e-07	205327	Signi	LACTB2
3254	31427789	2019	Nutritional	Salt added to food	6.7728e-07	386322	Signi	LACTB2
4093	29844566	2018	Cognitive	Verbal-numerical reasoning	1.5629e-06	168033	Signi	LACTB2
4079	30239722	2018	Metabolic	Waist-hip ratio (female)	2.0939e-06	381152	Signi	LACTB2
80	22504420	2012	Skeletal	Femoral Neck BMD	2.3777e-06	32961	Signi	LACTB2
4279	30804560	2019	Respiratory	FVC	3.6667e-06	400102	Signi	LACTB2
4280	30804560	2019	Respiratory	FEV1/FVC ratio	3.6722e-06	400102	Signi	LACTB2
4067	30038396	2018	Cognitive	Cognitive performance	9.0002e-06	257828	Signi	LACTB2
4043	30124842	2018	Skeletal	Height	4.0742e-09	693529	Signi	LRRC15
3283	31427789	2019	Social Interactions	Number of full sisters	7.5176e-07	380122	Signi	LRRC19
3499	31427789	2019	Dermatological	Hair colour (natural, before greying): Black	1.2636e-06	385603	Signi	LRRC19
3187	31427789	2019	Skeletal	Standing height	3.8295e-06	385748	Signi	LRRC19
1012	27989323	2017	Immunological	TNF-related apoptosis inducing ligand	4.4033e-13	8186	Signi	MEP1B
222	25772697	2015	Immunological	B:%Mature	1.1311e-07	669	Signi	MME
3187	31427789	2019	Skeletal	Standing height	3.3067e-06	385748	Signi	MME
63	28436984	2017	Reproduction	Age at menarche	1.3108e-12	252514	Signi	NR5A1
3339	31427789	2019	Reproduction	Age when periods started (menarche) (female)	1.5596e-12	202636	Signi	NR5A1
4317	30643251	2019	Psychiatric	Drinks per day	5.2035e-09	537349	Signi	NR5A1
4303	30664634	2019	Metabolic	Legs-leg fat ratio (male)	3.8067e-08	167431	Signi	NR5A1
4172	29970889	2018	Social Interactions	Social support - Leisure/social activities: Pub or social club	4.9984e-07	452302	Signi	NR5A1
4043	30124842	2018	Skeletal	Height	1.2296e-06	693529	Signi	NR5A1
4305	30664634	2019	Metabolic	Trunk-trunk fat ratio (male)	2.9503e-06	167431	Signi	NR5A1
4069	BioRxiv: https://doi.org/10.1101/261081	2018	Psychiatric	Drinks per week	3.1911e-06	414343	Signi	NR5A1
4050	28358823	2017	Body Structures	Anterior cruciate ligament rupture (fixed effect model)	3.21e-06	99342	Signi	NR5A1
4051	28358823	2017	Body Structures	Anterior cruciate ligament rupture (random effect model)	3.21e-06	99342	Signi	NR5A1
3221	31427789	2019	Activities	Time spent driving	5.3058e-06	258336	Signi	NR5A1
4294	30696823	2019	Psychiatric	Chronotype	5.9127e-06	449732	Signi	NR5A1
3264	31427789	2019	Psychiatric	Average weekly beer plus cider intake	9.6679e-06	274556	Signi	NR5A1
3577	31427789	2019	Social Interactions	Social support - Leisure/social activities: Pub or social club	9.6691e-06	385280	Signi	NR5A1
4279	30804560	2019	Respiratory	FVC	1.7404e-14	400102	Signi	NR5A2
4283	30804560	2019	Respiratory	FVC	1.4549e-12	321047	Signi	NR5A2
4043	30124842	2018	Skeletal	Height	4.1888e-12	693529	Signi	NR5A2
4080	30239722	2018	Metabolic	Waist-hip ratio (adjusted for BMI)	7.4093e-12	694649	Signi	NR5A2
4278	30804560	2019	Respiratory	FEV1	5.6614e-11	400102	Signi	NR5A2
3187	31427789	2019	Skeletal	Standing height	9.8646e-11	385748	Signi	NR5A2
3412	31427789	2019	Skeletal	Sitting height	1.3989e-09	385393	Signi	NR5A2
4282	30804560	2019	Respiratory	FEV1	1.4084e-09	321047	Signi	NR5A2
2030	28067908	2017	Gastrointestinal	Ulcerative colitis	2.8199e-09	45975	Signi	NR5A2
4077	30239722	2018	Metabolic	Waist-hip ratio	2.4699e-08	697734	Signi	NR5A2
1046	17903296	2007	Skeletal	Trochanter BMD (FBAT, adjusted for multivariable)	4.5478e-07	1141	Signi	NR5A2
3310	31427789	2019	Activities	Age started wearing glasses or contact lenses	7.1158e-07	332074	Signi	NR5A2
3539	31427789	2019	Activities	Reason for glasses/contact lenses: For short-sightedness, i.e. only or mainly for distance viewing such as driving, cinema etc (called 'myopia')	1.035e-06	78647	Signi	NR5A2
4082	30239722	2018	Metabolic	Waist-hip ratio (adjusted for BMI, female)	1.1625e-06	379501	Signi	NR5A2
1209	26635072	2015	Respiratory	FVC	5.6712e-06	38199	Signi	NR5A2
3339	31427789	2019	Reproduction	Age when periods started (menarche) (female)	7.5559e-06	202636	Signi	NR5A2
3218	31427789	2019	Activities	Time spent outdoors in winter	7.8582e-06	304316	Signi	NR5A2
3305	31427789	2019	Reproduction	Lifetime number of sexual partners	8.7774e-06	316569	Signi	NR5A2
4081	30239722	2018	Metabolic	Waist-hip ratio (adjusted for BMI, male)	9.075e-06	315284	Signi	NR5A2
3271	31427789	2019	Skeletal	Comparative height size at age 10	6.4089e-07	380167	Signi	NTS
3274	31427789	2019	Dermatological	Ease of skin tanning	1.796e-08	378364	Signi	PDE9A
4043	30124842	2018	Skeletal	Height	2.7336e-08	693529	Signi	PDE9A
4215	31015462	2019	Metabolic	Estimated glomerular filtration rate	4.7478e-07	350504	Signi	PDE9A
3843	27863252	2016	Immunological	Hematocrit (two-way meta)	7.4801e-07	132699	Signi	PDE9A
3187	31427789	2019	Skeletal	Standing height	6.6786e-06	385748	Signi	PDE9A
407	24816252	2014	Metabolic	Amino acid::Tryptophan metabolism::kynurenine	1.0098e-05	7816	Signi	PDE9A
4100	29403010	2018	Metabolic	Low-density-lipoprotein cholesterol	6.8545e-11	72866	Signi	PLA2G12B
899	27005778	2016	Metabolic	Cholesterol esters in large VLDL	1.1319e-06	18960	Signi	PLA2G12B
953	27005778	2016	Metabolic	VLDL diameter	1.161e-06	19273	Signi	PLA2G12B
961	27005778	2016	Metabolic	Total lipids in very large VLDL	2.5626e-06	19273	Signi	PLA2G12B
4137	29403010	2018	Immunological	Hematocrit	9.9769e-06	108757	Signi	PLA2G12B
4178	31217584	2019	Immunological	White blood cells	6.4951e-16	28608	Signi	POU2F1
3447	31427789	2019	Metabolic	Impedance measures - Impedance of whole body	5.6531e-07	379792	Signi	POU2F1
3448	31427789	2019	Metabolic	Impedance measures - Impedance of leg (right)	7.2918e-07	379813	Signi	POU2F1
3449	31427789	2019	Metabolic	Impedance measures - Impedance of leg (left)	1.742e-06	379807	Signi	POU2F1
3552	31427789	2019	Respiratory	Blood clot, DVT, bronchitis, emphysema, asthma, rhinitis, eczema, allergy diagnosed by doctor: Asthma	4.1612e-06	385822	Signi	POU2F1
3450	31427789	2019	Metabolic	Impedance measures - Impedance of arm (right)	6.7944e-06	379786	Signi	POU2F1
3451	31427789	2019	Metabolic	Impedance measures - Impedance of arm (left)	9.4496e-06	379803	Signi	POU2F1
3261	31427789	2019	Psychiatric	Alcohol intake frequency	6.9005e-09	386082	Signi	PRCP
3885	27863252	2016	Immunological	Lymphocyte percentage of white cells (three-way meta)	1.3793e-06	171748	Signi	PRCP
4066	30038396	2018	Environment	Educational attainment	2.2956e-06	766345	Signi	PRCP
3896	27863252	2016	Immunological	Neutrophil percentage of white cells (three-way meta)	3.0448e-06	171542	Signi	PRCP
3211	31427789	2019	Activities	Frequency of stair climbing in last 4 weeks	1.0399e-05	382731	Signi	PRCP
3290	31427789	2019	Psychiatric	Worrier / anxious feelings	2.5052e-08	376411	Signi	RASEF
3997	29500382	2018	Psychiatric	Worrier / anxious feelings (WORRY)	4.5671e-08	264646	Signi	RASEF
3990	29500382	2018	Psychiatric	Neuroticism sum score	7.3049e-06	380506	Signi	RASEF
4043	30124842	2018	Skeletal	Height	1.2596e-30	693529	Signi	RORA
4352	30573740	2018	Dermatological	Male pattern baldness (BOLT LMM non-infinitesimal mixed model)	1.1839e-26	205327	Signi	RORA
3187	31427789	2019	Skeletal	Standing height	1.5855e-24	385748	Signi	RORA
4351	30573740	2018	Dermatological	Male pattern baldness (BOLT LMM infinitesimal mixed model)	3.8046e-23	205327	Signi	RORA
4074	30239722	2018	Metabolic	Body Mass Index	3.4528e-21	806834	Signi	RORA
2975	28240269	2017	Cell	ANXA2 - Annexin A2	5.6345e-16	1000	Signi	RORA
4076	30239722	2018	Metabolic	Body Mass Index (female)	1.231e-15	434794	Signi	RORA
4266	30929738	2019	Respiratory	Asthma (child-onset)	3.2978e-15	314633	Signi	RORA
3599	31427789	2019	Respiratory	Non-cancer illness code, self-reported: asthma	2.263e-14	289307	Signi	RORA
4044	30124842	2018	Metabolic	Body Mass Index	1.0364e-13	681275	Signi	RORA
3469	31427789	2019	Metabolic	Impedance measures - Trunk fat mass	1.4326e-13	379578	Signi	RORA
3436	31427789	2019	Metabolic	Weight	1.7493e-13	385473	Signi	RORA
3552	31427789	2019	Respiratory	Blood clot, DVT, bronchitis, emphysema, asthma, rhinitis, eczema, allergy diagnosed by doctor: Asthma	1.9745e-13	385822	Signi	RORA
3440	31427789	2019	Metabolic	Impedance measures - Weight	2.9397e-13	379840	Signi	RORA
3500	31427789	2019	Dermatological	Male-specific factors - Hair/balding pattern: Pattern 1	7.0231e-13	176380	Signi	RORA
3468	31427789	2019	Metabolic	Impedance measures - Trunk fat percentage	1.4369e-12	379600	Signi	RORA
3471	31427789	2019	Metabolic	Impedance measures - Trunk predicted mass	2.9041e-12	379469	Signi	RORA
3470	31427789	2019	Metabolic	Impedance measures - Trunk fat-free mass	3.889e-12	379507	Signi	RORA
3442	31427789	2019	Metabolic	Impedance measures - Whole body fat mass	4.8396e-12	379203	Signi	RORA
3441	31427789	2019	Metabolic	Impedance measures - Body fat percentage	7.3617e-12	379615	Signi	RORA
3553	31427789	2019	Respiratory	Blood clot, DVT, bronchitis, emphysema, asthma, rhinitis, eczema, allergy diagnosed by doctor: Hayfever, allergic rhinitis or eczema	1.0917e-11	385822	Signi	RORA
3446	31427789	2019	Metabolic	Impedance measures - Basal metabolic rate	1.2485e-11	379821	Signi	RORA
3443	31427789	2019	Metabolic	Impedance measures - Whole body fat-free mass	1.854e-11	379804	Signi	RORA
4235	31015401	2019	Environmental	Adrenergics, inhalants	2.7357e-11	176445	Signi	RORA
3444	31427789	2019	Metabolic	Impedance measures - Whole body water mass	4.0355e-11	379835	Signi	RORA
3271	31427789	2019	Skeletal	Comparative height size at age 10	4.7791e-11	380167	Signi	RORA
3186	31427789	2019	Metabolic	Hip circumference	8.2266e-11	385887	Signi	RORA
3464	31427789	2019	Metabolic	Impedance measures - Arm fat percentage (left)	2.4322e-10	379699	Signi	RORA
3459	31427789	2019	Metabolic	Impedance measures - Leg predicted mass (left)	2.9009e-10	379761	Signi	RORA
3458	31427789	2019	Metabolic	Impedance measures - Leg fat-free mass (left)	3.1752e-10	379766	Signi	RORA
3452	31427789	2019	Metabolic	Impedance measures - Leg fat percentage (right)	6.3729e-10	379806	Signi	RORA
3460	31427789	2019	Metabolic	Impedance measures - Arm fat percentage (right)	1.2117e-09	379752	Signi	RORA
3453	31427789	2019	Metabolic	Impedance measures - Leg fat mass (right)	1.3809e-09	379802	Signi	RORA
3463	31427789	2019	Metabolic	Impedance measures - Arm predicted mass (right)	1.5029e-09	379716	Signi	RORA
3467	31427789	2019	Metabolic	Impedance measures - Arm predicted mass (left)	1.862e-09	379638	Signi	RORA
3185	31427789	2019	Metabolic	Waist circumference	2.0121e-09	385932	Signi	RORA
3466	31427789	2019	Metabolic	Impedance measures - Arm fat-free mass (left)	2.0494e-09	379653	Signi	RORA
3605	31427789	2019	Respiratory	Non-cancer illness code, self-reported: hayfever/allergic rhinitis	2.3848e-09	289307	Signi	RORA
3462	31427789	2019	Metabolic	Impedance measures - Arm fat-free mass (right)	2.4566e-09	379723	Signi	RORA
3457	31427789	2019	Metabolic	Impedance measures - Leg fat mass (left)	2.7846e-09	379783	Signi	RORA
142	25282103	2014	Skeletal	Height	6.0509e-09	253288	Signi	RORA
3966	29273806	2018	Respiratory	Asthma (fixed effect model)	6.5408e-09	142486	Signi	RORA
3839	27863252	2016	Immunological	Eosinophil percentage of white cells (two-way meta)	6.9029e-09	132052	Signi	RORA
3838	27863252	2016	Immunological	Eosinophil count (two-way meta)	7.6915e-09	131999	Signi	RORA
4082	30239722	2018	Metabolic	Waist-hip ratio (adjusted for BMI, female)	8.8299e-09	379501	Signi	RORA
3339	31427789	2019	Reproduction	Age when periods started (menarche) (female)	8.9505e-09	202636	Signi	RORA
3456	31427789	2019	Metabolic	Impedance measures - Leg fat percentage (left)	1.1291e-08	379786	Signi	RORA
4302	30664634	2019	Metabolic	Arms-arm fat ratio (female)	1.1861e-08	195068	Signi	RORA
3503	31427789	2019	Dermatological	Male-specific factors - Hair/balding pattern: Pattern 4	1.2079e-08	176380	Signi	RORA
2024	23089632	2013	Psychiatric	Alcohol dependence	1.3694e-08	2322	Signi	RORA
4236	31015401	2019	Environmental	Glucocorticoids	1.9567e-08	205700	Signi	RORA
3840	27863252	2016	Immunological	Eosinophil percentage of granulocytes (two-way meta)	2.3018e-08	131525	Signi	RORA
3412	31427789	2019	Skeletal	Sitting height	3.3379e-08	385393	Signi	RORA
3236	31427789	2019	Psychiatric	Past tobacco smoking	3.5529e-08	355594	Signi	RORA
3455	31427789	2019	Metabolic	Impedance measures - Leg predicted mass (right)	4.8561e-08	379793	Signi	RORA
4080	30239722	2018	Metabolic	Waist-hip ratio (adjusted for BMI)	4.8945e-08	694649	Signi	RORA
3454	31427789	2019	Metabolic	Impedance measures - Leg fat-free mass (right)	5.0886e-08	379793	Signi	RORA
2022	23583980	2013	Respiratory	Fibrotic idiopathic interstitial pneumonias	5.8882e-08	6299	Signi	RORA
3414	31427789	2019	Metabolic	Birth weight	5.8907e-08	219088	Signi	RORA
3874	27863252	2016	Immunological	Eosinophil count (three-way meta)	8.4739e-08	172275	Signi	RORA
3372	31427789	2019	Respiratory	Age hay fever, rhinitis or eczema diagnosed	9.5045e-08	77452	Signi	RORA
4267	30929738	2019	Respiratory	Asthma (adult-onset)	1.0323e-07	327253	Signi	RORA
3968	29273806	2018	Respiratory	Asthma (fixed effect model)	1.1225e-07	127669	Signi	RORA
4077	30239722	2018	Metabolic	Waist-hip ratio	1.1436e-07	697734	Signi	RORA
3465	31427789	2019	Metabolic	Impedance measures - Arm fat mass (left)	1.1567e-07	379663	Signi	RORA
3461	31427789	2019	Metabolic	Impedance measures - Arm fat mass (right)	1.1884e-07	379725	Signi	RORA
3437	31427789	2019	Respiratory	Doctor diagnosed hayfever or allergic rhinitis	1.4466e-07	97640	Signi	RORA
2007	22377632	2012	Reproduction	Parental transmission distortion	1.7488e-07	4728	Signi	RORA
2021	23143601	2012	Neoplasms	Squamous cell (adjusted for age)	1.7711e-07	8881	Signi	RORA
4378	30940143	2019	Cardiovascular	High blood pressure	2.0826e-07	458554	Signi	RORA
2005	22377632	2012	Reproduction	Maternal transmission distortion	2.6495e-07	4728	Signi	RORA
2006	22377632	2012	Reproduction	Paternal transmission distortion	2.6495e-07	4728	Signi	RORA
63	28436984	2017	Reproduction	Age at menarche	2.8983e-07	252514	Signi	RORA
4079	30239722	2018	Metabolic	Waist-hip ratio (female)	3.3701e-07	381152	Signi	RORA
4066	30038396	2018	Environment	Educational attainment	4.028e-07	766345	Signi	RORA
3875	27863252	2016	Immunological	Eosinophil percentage of white cells (three-way meta)	4.3515e-07	172378	Signi	RORA
3282	31427789	2019	Social Interactions	Number of full brothers	5.3357e-07	380062	Signi	RORA
4278	30804560	2019	Respiratory	FEV1	6.6093e-07	400102	Signi	RORA
3241	31427789	2019	Nutritional	Salad / raw vegetable intake	6.9738e-07	363780	Signi	RORA
3876	27863252	2016	Immunological	Eosinophil percentage of granulocytes (three-way meta)	9.3155e-07	170536	Signi	RORA
4067	30038396	2018	Cognitive	Cognitive performance	1.0313e-06	257828	Signi	RORA
3967	29273806	2018	Respiratory	Asthma (random effect model)	1.0664e-06	142486	Signi	RORA
3219	31427789	2019	Activities	Time spent watching television (TV)	1.0674e-06	365236	Signi	RORA
2025	22952603	2012	Psychiatric	10 mg response to amphetamine	1.0747e-06	381	Signi	RORA
4050	28358823	2017	Body Structures	Anterior cruciate ligament rupture (fixed effect model)	1.1524e-06	99342	Signi	RORA
3785	29942086	2018	Cognitive	Intelligence	1.3875e-06	269867	Signi	RORA
2019	23143601	2012	Neoplasms	Lung canger (adjusted for age)	1.7785e-06	8881	Signi	RORA
2016	24369049	2014	Psychiatric	Lithium response in Bipolar I patients - Alda Scale of 5 to 6	3.1252e-06	294	Signi	RORA
3435	31427789	2019	Metabolic	Body Mass Index	3.2613e-06	385336	Signi	RORA
4307	30664745	2019	Skeletal	Osteoarthritis	3.8089e-06	455221	Signi	RORA
4131	29403010	2018	Immunological	Eosinophil count	5.1958e-06	62076	Signi	RORA
3969	29273806	2018	Respiratory	Asthma (random effect model)	5.2706e-06	127669	Signi	RORA
2026	22952603	2012	Psychiatric	Baseline positive affect factor score	5.4437e-06	381	Signi	RORA
3818	29083406	2017	Respiratory	Asthma, hay fever or eczema	5.6137e-06	242569	Signi	RORA
3614	31427789	2019	Activities	Treatment/medication code: ventolin 100micrograms inhaler	5.7219e-06	280443	Signi	RORA
3858	27863252	2016	Immunological	Neutrophil percentage of granulocytes (two-way meta)	6.055e-06	131660	Signi	RORA
3837	27863252	2016	Immunological	Sum eosinophil basophil count (two-way meta)	6.6847e-06	131557	Signi	RORA
1529	17903299	2007	Metabolic	Remnant lipoprotein cholesterol (at exam 4, GEE)	6.8591e-06	746	Signi	RORA
2015	24369049	2014	Psychiatric	Lithium response in Bipolar I patients - Alda Scale of 4 to 5	7.065e-06	294	Signi	RORA
3873	27863252	2016	Immunological	Sum eosinophil basophil count (three-way meta)	7.4737e-06	171771	Signi	RORA
2023	24934506	2014	Endocrine	Skin fluorescence	9.1343e-06	1082	Signi	RORA
2020	23143601	2012	Neoplasms	Adenocarcinoma (adjusted for age)	9.5232e-06	8881	Signi	RORA
3445	31427789	2019	Metabolic	Impedance measures - Body Mass Index (BMI)	9.6145e-06	379831	Signi	RORA
3450	31427789	2019	Metabolic	Impedance measures - Impedance of arm (right)	1.475e-11	379786	Signi	RORB
3451	31427789	2019	Metabolic	Impedance measures - Impedance of arm (left)	4.0993e-10	379803	Signi	RORB
3468	31427789	2019	Metabolic	Impedance measures - Trunk fat percentage	3.7798e-08	379600	Signi	RORB
3447	31427789	2019	Metabolic	Impedance measures - Impedance of whole body	4.0802e-08	379792	Signi	RORB
4043	30124842	2018	Skeletal	Height	7.1415e-08	693529	Signi	RORB
4175	30048462	2018	Skeletal	Heel bone mineral density	3.5913e-07	394929	Signi	RORB
3997	29500382	2018	Psychiatric	Worrier / anxious feelings (WORRY)	4.5907e-07	264646	Signi	RORB
3881	27863252	2016	Immunological	High light scatter percentage of red cells (three-way meta)	5.2339e-07	170763	Signi	RORB
4352	30573740	2018	Dermatological	Male pattern baldness (BOLT LMM non-infinitesimal mixed model)	7.6457e-07	205327	Signi	RORB
3325	31427789	2019	Reproduction	Relative age voice broke (male)	1.9294e-06	164394	Signi	RORB
3903	27863252	2016	Immunological	Reticulocyte fraction of red cells (three-way meta)	2.3943e-06	170690	Signi	RORB
3441	31427789	2019	Metabolic	Impedance measures - Body fat percentage	2.5139e-06	379615	Signi	RORB
2021	23143601	2012	Neoplasms	Squamous cell (adjusted for age)	2.8736e-06	8881	Signi	RORB
3798	29942085	2018	Psychiatric	Worry subcluster	3.1847e-06	348219	Signi	RORB
3290	31427789	2019	Psychiatric	Worrier / anxious feelings	3.7897e-06	376411	Signi	RORB
3380	31427789	2019	Cardiovascular	Systolic Blood Pressure (automated reading)	4.1503e-06	361402	Signi	RORB
3469	31427789	2019	Metabolic	Impedance measures - Trunk fat mass	4.1906e-06	379578	Signi	RORB
3882	27863252	2016	Immunological	High light scatter reticulocyte count (three-way meta)	4.8561e-06	170761	Signi	RORB
3292	31427789	2019	Psychiatric	Worry too long after embarrassment	5.3518e-06	370660	Signi	RORB
3883	27863252	2016	Immunological	Immature fraction of reticulocytes (three-way meta)	6.5388e-06	170548	Signi	RORB
3191	31427789	2019	Activities	Number of treatments/medications taken	7.3992e-06	386581	Signi	RORB
3187	31427789	2019	Skeletal	Standing height	7.7558e-06	385748	Signi	RORB
3999	29500382	2018	Psychiatric	Worry too long after embarrassment (WORR-EMB)	9.1331e-06	261094	Signi	RORB
96	23449627	2013	Skeletal	Height SDS (female at age 10)	9.2948e-06	6974	Signi	RORB
4178	31217584	2019	Immunological	White blood cells	1.2462e-15	28608	Signi	RORC
4266	30929738	2019	Respiratory	Asthma (child-onset)	2.2015e-14	314633	Signi	RORC
4043	30124842	2018	Skeletal	Height	3.3144e-11	693529	Signi	RORC
3553	31427789	2019	Respiratory	Blood clot, DVT, bronchitis, emphysema, asthma, rhinitis, eczema, allergy diagnosed by doctor: Hayfever, allergic rhinitis or eczema	4.4012e-11	385822	Signi	RORC
2031	28067908	2017	Gastrointestinal	Inflammatory Bowel Disease	1.2444e-10	59957	Signi	RORC
3606	31427789	2019	Dermatological	Non-cancer illness code, self-reported: eczema/dermatitis	2.1185e-10	289307	Signi	RORC
3879	27863252	2016	Immunological	Hematocrit (three-way meta)	4.7533e-09	173039	Signi	RORC
3552	31427789	2019	Respiratory	Blood clot, DVT, bronchitis, emphysema, asthma, rhinitis, eczema, allergy diagnosed by doctor: Asthma	1.0735e-08	385822	Signi	RORC
3843	27863252	2016	Immunological	Hematocrit (two-way meta)	2.1852e-08	132699	Signi	RORC
3599	31427789	2019	Respiratory	Non-cancer illness code, self-reported: asthma	2.2158e-08	289307	Signi	RORC
2030	28067908	2017	Gastrointestinal	Ulcerative colitis	2.6206e-08	45975	Signi	RORC
3844	27863252	2016	Immunological	Hemoglobin concentration (two-way meta)	4.8193e-08	132596	Signi	RORC
3880	27863252	2016	Immunological	Hemoglobin concentration (three-way meta)	5.6477e-08	172925	Signi	RORC
2029	28067908	2017	Gastrointestinal	Crohn's Disease	1.5469e-07	40266	Signi	RORC
3372	31427789	2019	Respiratory	Age hay fever, rhinitis or eczema diagnosed	2.1647e-07	77452	Signi	RORC
3818	29083406	2017	Respiratory	Asthma, hay fever or eczema	4.7593e-07	242569	Signi	RORC
3187	31427789	2019	Skeletal	Standing height	5.8422e-07	385748	Signi	RORC
3602	31427789	2019	Endocrine	Non-cancer illness code, self-reported: hypothyroidism/myxoedema	5.9749e-07	289307	Signi	RORC
4365	29899525	2018	Activities	Moderate to vigorous physical activity levels	1.0574e-06	377234	Signi	RORC
4352	30573740	2018	Dermatological	Male pattern baldness (BOLT LMM non-infinitesimal mixed model)	1.3936e-06	205327	Signi	RORC
4351	30573740	2018	Dermatological	Male pattern baldness (BOLT LMM infinitesimal mixed model)	2.4647e-06	205327	Signi	RORC
4346	30525989	2018	Cardiovascular	Coronary artery disease and triglyceride (bivariate)	2.7629e-06	735838	Signi	RORC
3900	27863252	2016	Immunological	Red blood cell count (three-way meta)	3.9169e-06	172952	Signi	RORC
4122	29403010	2018	Metabolic	Gamma-glutamyl transferase	7.7333e-06	118309	Signi	RORC
439	24816252	2014	Metabolic	Carbohydrate::Glycolysis, gluconeogenesis, pyruvate metabolism::1,5-anhydroglucitol (1,5-AG)	9.272e-08	7746	Signi	SI
810	24816252	2014	Metabolic	::::X-12850	2.6415e-07	6251	Signi	SLC10A2
4050	28358823	2017	Body Structures	Anterior cruciate ligament rupture (fixed effect model)	7.6277e-06	99342	Signi	SLC10A2
3891	27863252	2016	Immunological	Mean platelet volume (three-way meta)	6.0395e-07	164454	Signi	SLC12A6
3274	31427789	2019	Dermatological	Ease of skin tanning	6.6103e-08	378364	Signi	SLC37A1
4043	30124842	2018	Skeletal	Height	9.8011e-19	693529	Signi	SLC3A1
3187	31427789	2019	Skeletal	Standing height	1.4289e-14	385748	Signi	SLC3A1
3229	31427789	2019	Psychiatric	Getting up in morning	1.5537e-14	385494	Signi	SLC3A1
3791	30804565	2019	Psychiatric	Ease of getting up in the morning	5.6523e-14	385949	Signi	SLC3A1
3230	31427789	2019	Psychiatric	Morning/evening person (chronotype)	9.6399e-14	345148	Signi	SLC3A1
3789	30804565	2019	Psychiatric	Morningness	2.5946e-13	345552	Signi	SLC3A1
4294	30696823	2019	Psychiatric	Chronotype	6.3209e-13	449732	Signi	SLC3A1
3271	31427789	2019	Skeletal	Comparative height size at age 10	3.5004e-10	380167	Signi	SLC3A1
142	25282103	2014	Skeletal	Height	1.5554e-09	253288	Signi	SLC3A1
4295	30696823	2019	Psychiatric	Morning person (binary)	1.1013e-08	403195	Signi	SLC3A1
4074	30239722	2018	Metabolic	Body Mass Index	1.5447e-08	806834	Signi	SLC3A1
3231	31427789	2019	Psychiatric	Nap during day	1.7268e-08	386124	Signi	SLC3A1
3456	31427789	2019	Metabolic	Impedance measures - Leg fat percentage (left)	2.6796e-08	379786	Signi	SLC3A1
3412	31427789	2019	Skeletal	Sitting height	9.9847e-08	385393	Signi	SLC3A1
4205	31152163	2019	Metabolic	Estimated glomerular filtration rate	1.5378e-07	765348	Signi	SLC3A1
3452	31427789	2019	Metabolic	Impedance measures - Leg fat percentage (right)	1.6115e-07	379806	Signi	SLC3A1
4044	30124842	2018	Metabolic	Body Mass Index	1.756e-07	681275	Signi	SLC3A1
3274	31427789	2019	Dermatological	Ease of skin tanning	4.3634e-07	378364	Signi	SLC3A1
7	26754954	2016	Psychiatric	Anxiety disorder (factor score)	4.9844e-07	18186	Signi	SLC3A1
3464	31427789	2019	Metabolic	Impedance measures - Arm fat percentage (left)	1.0512e-06	379699	Signi	SLC3A1
3441	31427789	2019	Metabolic	Impedance measures - Body fat percentage	1.0907e-06	379615	Signi	SLC3A1
3460	31427789	2019	Metabolic	Impedance measures - Arm fat percentage (right)	2.4625e-06	379752	Signi	SLC3A1
4092	29844566	2018	Cognitive	Reaction time	6.247e-06	330069	Signi	SLC3A1
3445	31427789	2019	Metabolic	Impedance measures - Body Mass Index (BMI)	6.8395e-06	379831	Signi	SLC3A1
1204	24390342	2014	Connective Tissue	Rheumatoid Arthritis	1.5059e-105	103638	Signi	SLC44A4
3904	27863252	2016	Immunological	White blood cell count (three-way meta)	6.1615e-105	172435	Signi	SLC44A4
1203	24390342	2014	Connective Tissue	Rheumatoid Arthritis	4.2657e-101	58284	Signi	SLC44A4
3187	31427789	2019	Skeletal	Standing height	1.135e-88	385748	Signi	SLC44A4
3868	27863252	2016	Immunological	White blood cell count (two-way meta)	1.9961e-86	131969	Signi	SLC44A4
3824	22057235	2011	Gastrointestinal	Celiac disease	7.5387e-80	24269	Signi	SLC44A4
3892	27863252	2016	Immunological	Myeloid white cell count (three-way meta)	3.1075e-76	169219	Signi	SLC44A4
3412	31427789	2019	Skeletal	Sitting height	1.0542e-75	385393	Signi	SLC44A4
3884	27863252	2016	Immunological	Lymphocyte count (three-way meta)	4.3696e-72	171643	Signi	SLC44A4
3877	27863252	2016	Immunological	Granulocyte count (three-way meta)	2.8834e-71	169822	Signi	SLC44A4
3893	27863252	2016	Immunological	Sum neutrophil eosinophil count (three-way meta)	2.2909e-70	170384	Signi	SLC44A4
3872	27863252	2016	Immunological	Sum basophil neutrophil count (three-way meta)	3.552e-63	170143	Signi	SLC44A4
3895	27863252	2016	Immunological	Neutrophil count (three-way meta)	4.9468e-63	170702	Signi	SLC44A4
3848	27863252	2016	Immunological	Lymphocyte count (two-way meta)	4.6869e-61	132452	Signi	SLC44A4
3856	27863252	2016	Immunological	Myeloid white cell count (two-way meta)	8.0975e-61	130268	Signi	SLC44A4
3470	31427789	2019	Metabolic	Impedance measures - Trunk fat-free mass	7.3769e-58	379507	Signi	SLC44A4
3471	31427789	2019	Metabolic	Impedance measures - Trunk predicted mass	1.6076e-57	379469	Signi	SLC44A4
4080	30239722	2018	Metabolic	Waist-hip ratio (adjusted for BMI)	4.1464e-57	694649	Signi	SLC44A4
3841	27863252	2016	Immunological	Granulocyte count (two-way meta)	5.1968e-57	130875	Signi	SLC44A4
3857	27863252	2016	Immunological	Sum neutrophil eosinophil count (two-way meta)	1.3003e-56	131409	Signi	SLC44A4
3873	27863252	2016	Immunological	Sum eosinophil basophil count (three-way meta)	4.7196e-56	171771	Signi	SLC44A4
4043	30124842	2018	Skeletal	Height	2.4893e-55	693529	Signi	SLC44A4
2034	27992413	2017	Gastrointestinal	Primary sclerosing cholangitis	4.09e-54	14890	Signi	SLC44A4
3444	31427789	2019	Metabolic	Impedance measures - Whole body water mass	5.7075e-53	379835	Signi	SLC44A4
3443	31427789	2019	Metabolic	Impedance measures - Whole body fat-free mass	9.1247e-53	379804	Signi	SLC44A4
3874	27863252	2016	Immunological	Eosinophil count (three-way meta)	3.7676e-52	172275	Signi	SLC44A4
3859	27863252	2016	Immunological	Neutrophil count (two-way meta)	7.2733e-50	131564	Signi	SLC44A4
3836	27863252	2016	Immunological	Sum basophil neutrophil count (two-way meta)	1.1009e-49	131031	Signi	SLC44A4
4018	29848360	2018	Skeletal	Systemic Lupus Erythematosus	7.3267e-49	10995	Signi	SLC44A4
3837	27863252	2016	Immunological	Sum eosinophil basophil count (two-way meta)	1.3516e-45	131557	Signi	SLC44A4
3838	27863252	2016	Immunological	Eosinophil count (two-way meta)	2.9485e-45	131999	Signi	SLC44A4
3446	31427789	2019	Metabolic	Impedance measures - Basal metabolic rate	1.3768e-44	379821	Signi	SLC44A4
3889	27863252	2016	Immunological	Monocyte count (three-way meta)	8.6348e-44	170721	Signi	SLC44A4
3454	31427789	2019	Metabolic	Impedance measures - Leg fat-free mass (right)	9.0054e-42	379793	Signi	SLC44A4
3455	31427789	2019	Metabolic	Impedance measures - Leg predicted mass (right)	1.4305e-41	379793	Signi	SLC44A4
3466	31427789	2019	Metabolic	Impedance measures - Arm fat-free mass (left)	3.6005e-41	379653	Signi	SLC44A4
3467	31427789	2019	Metabolic	Impedance measures - Arm predicted mass (left)	3.705e-41	379638	Signi	SLC44A4
3823	26502338	2015	Skeletal	Systemic Lupus Erythematosus	1.0074e-40	14267	Signi	SLC44A4
3462	31427789	2019	Metabolic	Impedance measures - Arm fat-free mass (right)	1.5721e-40	379723	Signi	SLC44A4
3463	31427789	2019	Metabolic	Impedance measures - Arm predicted mass (right)	5.8393e-40	379716	Signi	SLC44A4
3271	31427789	2019	Skeletal	Comparative height size at age 10	6.0153e-38	380167	Signi	SLC44A4
3458	31427789	2019	Metabolic	Impedance measures - Leg fat-free mass (left)	7.9356e-38	379766	Signi	SLC44A4
3459	31427789	2019	Metabolic	Impedance measures - Leg predicted mass (left)	1.2559e-37	379761	Signi	SLC44A4
4077	30239722	2018	Metabolic	Waist-hip ratio	6.2445e-33	697734	Signi	SLC44A4
4082	30239722	2018	Metabolic	Waist-hip ratio (adjusted for BMI, female)	1.2045e-32	379501	Signi	SLC44A4
3853	27863252	2016	Immunological	Monocyte count (two-way meta)	1.3445e-32	131544	Signi	SLC44A4
4280	30804560	2019	Respiratory	FEV1/FVC ratio	5.1629e-31	400102	Signi	SLC44A4
2037	27723758	2016	Immunological	Immunoglobulin A deficiency	3.7879e-30	6487	Signi	SLC44A4
208	20453842	2010	Connective Tissue	Rheumatoid Arthritis	8.9625e-29	25708	Signi	SLC44A4
3832	27723757	2016	Dermatological	Vitiligo	8.9337e-27	44266	Signi	SLC44A4
3436	31427789	2019	Metabolic	Weight	5.27e-26	385473	Signi	SLC44A4
2052	26691988	2016	Ophthalmological	Age-related Macular Degeneration	9.9377e-26	33976	Signi	SLC44A4
4284	30804560	2019	Respiratory	FEV1/FVC ratio	3.8946e-25	321047	Signi	SLC44A4
3602	31427789	2019	Endocrine	Non-cancer illness code, self-reported: hypothyroidism/myxoedema	1.1353e-24	289307	Signi	SLC44A4
3440	31427789	2019	Metabolic	Impedance measures - Weight	1.0762e-23	379840	Signi	SLC44A4
4281	30804560	2019	Respiratory	PEF	2.2454e-22	345265	Signi	SLC44A4
4081	30239722	2018	Metabolic	Waist-hip ratio (adjusted for BMI, male)	3.1395e-22	315284	Signi	SLC44A4
4285	30804560	2019	Respiratory	PEF	8.2799e-21	321047	Signi	SLC44A4
4226	31015401	2019	Environmental	Thyroid preparations	7.9168e-20	305582	Signi	SLC44A4
4079	30239722	2018	Metabolic	Waist-hip ratio (female)	1.503e-19	381152	Signi	SLC44A4
3529	31427789	2019	Nutritional	Never eat eggs, dairy, wheat, sugar: Wheat products	2.3938e-19	384986	Signi	SLC44A4
3186	31427789	2019	Metabolic	Hip circumference	3.4097e-19	385887	Signi	SLC44A4
3191	31427789	2019	Activities	Number of treatments/medications taken	4.0993e-18	386581	Signi	SLC44A4
3902	27863252	2016	Immunological	Reticulocyte count (three-way meta)	2.1897e-17	170641	Signi	SLC44A4
3875	27863252	2016	Immunological	Eosinophil percentage of white cells (three-way meta)	3.8093e-15	172378	Signi	SLC44A4
3552	31427789	2019	Respiratory	Blood clot, DVT, bronchitis, emphysema, asthma, rhinitis, eczema, allergy diagnosed by doctor: Asthma	4.6552e-15	385822	Signi	SLC44A4
3866	27863252	2016	Immunological	Reticulocyte count (two-way meta)	1.3972e-14	130388	Signi	SLC44A4
3625	31427789	2019	Activities	Treatment/medication code: levothyroxine sodium	1.6943e-14	280443	Signi	SLC44A4
3551	31427789	2019	Cardiovascular	Vascular/heart problems diagnosed by doctor: High blood pressure	1.7188e-14	385699	Signi	SLC44A4
3982	29483656	2018	Psychiatric	Schizophrenia	2.0758e-14	105318	Signi	SLC44A4
3839	27863252	2016	Immunological	Eosinophil percentage of white cells (two-way meta)	2.0854e-14	132052	Signi	SLC44A4
3900	27863252	2016	Immunological	Red blood cell count (three-way meta)	2.143e-14	172952	Signi	SLC44A4
3876	27863252	2016	Immunological	Eosinophil percentage of granulocytes (three-way meta)	3.324e-14	170536	Signi	SLC44A4
3447	31427789	2019	Metabolic	Impedance measures - Impedance of whole body	4.107e-14	379792	Signi	SLC44A4
4078	30239722	2018	Metabolic	Waist-hip ratio (male)	7.2939e-14	316772	Signi	SLC44A4
4300	30674883	2019	Dermatological	Vitiligo (early onset)	7.6963e-14	9735	Signi	SLC44A4
3608	31427789	2019	Metabolic	Non-cancer illness code, self-reported: high cholesterol	1.0248e-13	289307	Signi	SLC44A4
3887	27863252	2016	Immunological	Mean corpuscular hemoglobin (three-way meta)	1.0914e-13	172332	Signi	SLC44A4
142	25282103	2014	Skeletal	Height	1.1332e-13	253288	Signi	SLC44A4
3869	27863252	2016	Immunological	Basophil count (three-way meta)	1.2449e-13	171846	Signi	SLC44A4
3190	31427789	2019	Mortality	Number of self-reported non-cancer illnesses	1.2833e-13	386581	Signi	SLC44A4
3903	27863252	2016	Immunological	Reticulocyte fraction of red cells (three-way meta)	1.4792e-13	170690	Signi	SLC44A4
3840	27863252	2016	Immunological	Eosinophil percentage of granulocytes (two-way meta)	1.9732e-13	131525	Signi	SLC44A4
3449	31427789	2019	Metabolic	Impedance measures - Impedance of leg (left)	2.6885e-13	379807	Signi	SLC44A4
3894	27863252	2016	Immunological	Neutrophil percentage of granulocytes (three-way meta)	3.2468e-13	170672	Signi	SLC44A4
3599	31427789	2019	Respiratory	Non-cancer illness code, self-reported: asthma	3.6314e-13	289307	Signi	SLC44A4
3685	31427789	2019	Endocrine	Diagnoses - secondary ICD10: E03 Other hypothyroidism	4.4427e-13	244890	Signi	SLC44A4
1067	19430480	2009	Endocrine	Type 1 Diabetes	4.8778e-13	7982	Signi	SLC44A4
3891	27863252	2016	Immunological	Mean platelet volume (three-way meta)	4.9361e-13	164454	Signi	SLC44A4
3864	27863252	2016	Immunological	Red blood cell count (two-way meta)	6.3677e-13	132690	Signi	SLC44A4
3590	31427789	2019	Activities	Medication for cholesterol, blood pressure or diabetes: Cholesterol lowering medication	6.9775e-13	176050	Signi	SLC44A4
3899	27863252	2016	Immunological	Platelet count (three-way meta)	7.4274e-13	166066	Signi	SLC44A4
3448	31427789	2019	Metabolic	Impedance measures - Impedance of leg (right)	9.5741e-13	379813	Signi	SLC44A4
3380	31427789	2019	Cardiovascular	Systolic Blood Pressure (automated reading)	9.632e-13	361402	Signi	SLC44A4
3332	31427789	2019	Activities	Taking other prescription medications	1.0718e-12	385236	Signi	SLC44A4
3815	20045101	2010	Immunological	CD4:CD8 lymphocyte ratio	1.1779e-12	2538	Signi	SLC44A4
4299	30674883	2019	Dermatological	Vitiligo (late onset)	1.2135e-12	20623	Signi	SLC44A4
3328	31427789	2019	Endocrine	Diabetes (diagnosed by doctor)	1.2962e-12	385420	Signi	SLC44A4
3855	27863252	2016	Immunological	Mean platelet volume (two-way meta)	1.3562e-12	127230	Signi	SLC44A4
3276	31427789	2019	Activities	Facial ageing	1.6887e-12	354097	Signi	SLC44A4
3684	31427789	2019	Infection	Diagnoses - main ICD10: R31 Hematuria	2.0594e-12	300791	Signi	SLC44A4
3597	31427789	2019	Cardiovascular	Non-cancer illness code, self-reported: hypertension	2.3277e-12	289307	Signi	SLC44A4
4017	29848360	2018	Skeletal	Systemic Lupus Erythematosus	2.4793e-12	2431	Signi	SLC44A4
4278	30804560	2019	Respiratory	FEV1	2.707e-12	400102	Signi	SLC44A4
3867	27863252	2016	Immunological	Reticulocyte fraction of red cells (two-way meta)	2.8031e-12	130404	Signi	SLC44A4
4040	29906448	2018	Psychiatric	Schizophrenia/Bipolar disorder	3.2401e-12	107620	Signi	SLC44A4
3451	31427789	2019	Metabolic	Impedance measures - Impedance of arm (left)	3.8173e-12	379803	Signi	SLC44A4
3897	27863252	2016	Immunological	Plateletcrit (three-way meta)	4.1096e-12	164339	Signi	SLC44A4
11	25056061	2014	Psychiatric	Schizophrenia	4.5708e-12	82315	Signi	SLC44A4
13	24280982	2014	Psychiatric	Schizophrenia vs Bipolar disorder	4.5708e-12	16381	Signi	SLC44A4
4279	30804560	2019	Respiratory	FVC	5.2023e-12	400102	Signi	SLC44A4
2060	28240269	2017	Cell	C4A C4B - Complement C4b	5.7835e-12	1000	Signi	SLC44A4
3852	27863252	2016	Immunological	Mean corpuscular volume (two-way meta)	6.3967e-12	132353	Signi	SLC44A4
3858	27863252	2016	Immunological	Neutrophil percentage of granulocytes (two-way meta)	7.482e-12	131660	Signi	SLC44A4
4086	30297969	2018	Endocrine	Type 2 Diabetes (adjusted for BMI)	8.6986e-12	898130	Signi	SLC44A4
3851	27863252	2016	Immunological	Mean corpuscular hemoglobin (two-way meta)	8.7057e-12	132224	Signi	SLC44A4
3450	31427789	2019	Metabolic	Impedance measures - Impedance of arm (right)	1.0921e-11	379786	Signi	SLC44A4
3882	27863252	2016	Immunological	High light scatter reticulocyte count (three-way meta)	1.3497e-11	170761	Signi	SLC44A4
4282	30804560	2019	Respiratory	FEV1	1.3682e-11	321047	Signi	SLC44A4
4346	30525989	2018	Cardiovascular	Coronary artery disease and triglyceride (bivariate)	1.7218e-11	735838	Signi	SLC44A4
1202	24390342	2014	Connective Tissue	Rheumatoid Arthritis	1.8976e-11	22515	Signi	SLC44A4
4085	30297969	2018	Endocrine	Type 2 Diabetes	2.1696e-11	898130	Signi	SLC44A4
4038	29906448	2018	Psychiatric	Schizophrenia	2.1958e-11	87491	Signi	SLC44A4
4068	BioRxiv: https://doi.org/10.1101/261081	2018	Activities	Automobile speeding propensity	2.2778e-11	404291	Signi	SLC44A4
3846	27863252	2016	Immunological	High light scatter reticulocyte count (two-way meta)	3.447e-11	130517	Signi	SLC44A4
4283	30804560	2019	Respiratory	FVC	4.2255e-11	321047	Signi	SLC44A4
3438	31427789	2019	Respiratory	Doctor diagnosed asthma	5.5113e-11	97640	Signi	SLC44A4
3888	27863252	2016	Immunological	Mean corpuscular volume (three-way meta)	5.8885e-11	172433	Signi	SLC44A4
3469	31427789	2019	Metabolic	Impedance measures - Trunk fat mass	6.0153e-11	379578	Signi	SLC44A4
4223	31015401	2019	Environmental	Calcium channel blockers	6.577e-11	204378	Signi	SLC44A4
[truncated: 154 more rows]

## Sheet: TableS8.Domain Enrichment
Domain	P	Sig
[truncated: 25 more rows]

[truncated: 8 more sheets: TableS8.miRNAEnrichment, TableS9.COVID-19HGI A2_V2, TableS10.COVID-19HGI B1_V2, TableS11.COVID-19HGI B2_V2, TableS12.COVID-19HGI C1_V2, TableS13.COVID-19HGI C2_V2, TableS14.COVID-19HGI D1_V2, Sheet4]
